# Supplementary material for: Histone Variant H2A.J Is Enriched in Luminal Epithelial Gland Cells
Source: MDPI journal article supplement (doi:10.3390/genes12111665), 2021-10-22
Supplement: s1 [file s1]

**Supplementary Table S1.** Number of patient samples for each tissue type obtained from the TGEx v.8 database.

| <b>Tissue</b>   | <b>Number of samples</b> |
|-----------------|--------------------------|
| Adipose Tissue  | 1204                     |
| Adrenal Gland   | 258                      |
| Bladder         | 21                       |
| Blood           | 929                      |
| Brain           | 2642                     |
| Breast          | 459                      |
| Colon           | 779                      |
| Esophagus       | 1445                     |
| Fallopian Tube  | 9                        |
| Heart           | 861                      |
| Kidney          | 89                       |
| Liver           | 226                      |
| Lung            | 578                      |
| Muscle          | 803                      |
| Ovary           | 180                      |
| Pancreas        | 328                      |
| Pituitary       | 283                      |
| Prostate        | 245                      |
| Salivary Gland  | 162                      |
| Skin            | 1809                     |
| Small Intestine | 187                      |
| Spleen          | 241                      |
| Stomach         | 359                      |
| Testis          | 361                      |
| Thyroid         | 653                      |
| Uterus          | 142                      |
| Vagina          | 156                      |
