# Supplementary material for: Histone Variant H2A.J Is Enriched in Luminal Epithelial Gland Cells
Source: Genes (Basel). 2021 Oct 22;12(11):1665. doi: 10.3390/genes12111665 (PMC8619693; doi:10.3390/genes12111665)
Supplement: Supplementary file 1 [file genes-12-01665-s001.zip › SupplementaryTableS2_T47DandH2A.J-KO_TrancriptomeAnalysis.xlsx]

## Sheet: TPM
	T47D_1	T47D_2	T47D_3	T47DSen_1	T47DSen_2	T47DSen_3	KO1_1	KO1_2	KO1_3	KO1Sen_1	KO1Sen_2	KO1Sen_3	KO18_1	KO18_2	KO18_3	KO18Sen_1	KO18Sen_2	KO18Sen_3	Gene	GeneFun
ENSG00000121410	36.2898	35.3223	33.0804	41.2028	46.8506	47.4325	31.4202	30.0476	34.6374	37.9885	36.7607	41.4405	43.1692	35.1331	28.3951	40.3613	43.2018	43.5959	A1BG	alpha-1-B glycoprotein
ENSG00000268895	5.55148	4.47048	5.83659	8.52215	9.40822	9.64443	5.51841	5.24643	5.99666	10.0667	8.25735	7.64742	4.6197	5.30432	5.58544	9.49855	9.39318	8.6528	A1BG-AS1	A1BG antisense RNA 1
ENSG00000245105	0.101207	0.10208	0.204976	0.181062	0.240422	0.197421	0.291007	0.194565	0.118581	0.225067	0.147891	0.347049	0.021936	0.122361	0.159729	0.193398	0.115483	0.155401	A2M-AS1	A2M antisense RNA 1
ENSG00000128274	7.76469	6.83599	8.99945	1.78575	1.92291	2.36009	4.11179	4.02152	5.47944	2.15238	1.86463	1.49779	4.10946	4.25515	4.0336	1.76643	3.07612	1.94377	A4GALT	alpha 1,4-galactosyltransferase (P blood group)
ENSG00000094914	59.0039	56.277	59.4891	52.8756	55.4789	55.0389	61.7737	61.9563	68.2978	47.8647	51.0197	45.4526	58.9523	56.335	53.49	44.4215	46.6856	44.7666	AAAS	aladin WD repeat nucleoporin
ENSG00000081760	31.3134	29.1569	30.4709	26.1046	27.4377	26.9217	30.9961	31.9718	34.2237	26.0287	26.8697	26.9672	28.2025	29.2012	30.0773	24.7331	26.0561	25.8615	AACS	acetoacetyl-CoA synthetase
ENSG00000250420	0.051988	0.05164	0.05097	0.092268	0.153176	0.066857	0.046229	0.098324	0.011971	0.090805	0.153202	0.099826	0.952776	0.636525	0.838939	1.20045	1.34407	1.43484	AACSP1	acetoacetyl-CoA synthetase pseudogene 1
ENSG00000109576	0.346016	0.213631	0.29039	0.033446	0.134679	0.034155	0.271817	0.406398	0.138375	0	0.036558	0.181684	0.091364	0.064875	0.129229	0.106024	0.075031	0.038996	AADAT	aminoadipate aminotransferase
ENSG00000103591	76.7078	79.4353	80.9076	82.9409	77.6326	78.3962	80.0677	76.2638	77.1826	80.9194	77.9763	75.6516	70.3346	66.6725	67.3759	83.4399	84.8801	80.0628	AAGAB	alpha and gamma adaptin binding protein
ENSG00000115977	7.22344	5.89996	8.57175	6.14898	6.56076	7.5672	6.35069	7.33732	5.92212	8.76977	8.45936	4.56864	3.39507	4.76365	7.20246	6.79941	8.23286	7.59356	AAK1	AP2 associated kinase 1
ENSG00000087884	38.2985	41.666	37.1549	58.9086	56.2047	52.4494	35.0012	36.507	41.5057	50.5961	51.2115	56.0344	52.2228	49.8541	45.6098	49.5389	53.5364	50.2082	AAMDC	adipogenesis associated Mth938 domain containing
ENSG00000127837	113.253	114.18	118.4	116.824	118.663	114.858	113.75	118.462	128.405	104.166	103.803	114.623	115.522	114.009	104.196	98.8528	104.394	107.284	AAMP	angio associated migratory cell protein
ENSG00000131043	53.3257	51.8664	51.8876	61.6307	66.7928	67.3142	54.8885	53.3461	57.2013	63.6468	61.6254	61.0731	49.8188	56.9728	54.6874	59.8076	65.2858	61.6058	AAR2	AAR2 splicing factor
ENSG00000205002	1.73602	1.95324	2.01602	2.32276	2.94306	2.51368	2.75667	2.68243	2.79881	4.28627	5.19953	5.39568	1.89484	2.02243	1.65202	3.33156	3.08073	3.10094	AARD	alanine and arginine rich domain containing protein
ENSG00000090861	146.477	141.519	156.659	166.536	166.238	167.173	140.56	147.081	154.798	168.08	164.531	162.925	156.106	167.667	165.908	192.045	187.126	196.859	AARS1	alanyl-tRNA synthetase 1
ENSG00000124608	7.96617	7.61316	8.27735	8.76128	8.89803	8.88128	8.06169	7.88533	9.47915	8.88544	8.46509	7.69875	7.93828	8.94269	8.55617	9.01882	8.29293	8.86708	AARS2	alanyl-tRNA synthetase 2, mitochondrial
ENSG00000266967	53.7922	54.2578	52.7026	52.1876	49.1715	49.3638	57.8399	56.1879	55.2392	49.3343	47.892	47.6302	59.5671	50.9986	49.9419	45.4335	43.7137	47.7437	AARSD1	alanyl-tRNA synthetase domain containing 1
ENSG00000157426	8.58639	8.40473	7.87293	11.1399	10.4946	11.6112	8.16374	8.08543	5.37197	10.4813	11.0533	9.45746	6.77815	7.25571	7.78337	11.6283	11.1653	10.5868	AASDH	aminoadipate-semialdehyde dehydrogenase
ENSG00000149313	48.856	62.8733	64.606	58.6359	55.993	51.2002	57.5966	59.4833	46.3699	51.2278	50.6971	48.0381	51.0184	55.0382	57.2531	53.9514	52.6975	49.8458	AASDHPPT	aminoadipate-semialdehyde dehydrogenase-phosphopantetheinyl transferase
ENSG00000008311	1.144	1.40277	1.28043	2.80208	2.80212	2.64595	1.60904	1.35161	1.41452	3.95549	4.24562	3.5502	1.66847	1.53286	2.104	4.0616	4.31474	4.5173	AASS	aminoadipate-semialdehyde synthase
ENSG00000275700	59.2884	59.7226	64.2827	54.9363	53.3442	55.0642	63.4886	64.1807	63.7376	55.158	53.7477	58.9789	59.4845	61.1409	57.9317	49.054	48.8685	49.9806	AATF	apoptosis antagonizing transcription factor
ENSG00000181409	1.2065	1.60543	1.78049	0.636395	0.832994	1.19273	1.22841	1.60115	1.12614	1.02355	0.843511	1.07946	1.66089	1.38629	1.30211	0.545506	1.19552	0.627757	AATK	apoptosis associated tyrosine kinase
ENSG00000281376	0.72779	1.05866	1.80573	0.91016	1.76436	1.83171	0.655534	1.10517	0.880553	1.04179	0.78136	1.18714	1.09568	0.922723	1.03662	0.725663	1.2799	1.10856	ABALON	apoptotic BCL2L1-antisense long non-coding RNA
ENSG00000183044	24.751	26.265	28.9276	30.7107	31.2164	31.5878	19.7481	18.2394	17.3192	27.385	26.8439	23.6855	16.3399	19.3531	21.5089	31.4709	33.8533	30.417	ABAT	4-aminobutyrate aminotransferase
ENSG00000165029	0.226053	0.244951	0.195429	1.22641	1.11464	1.27082	0.308838	0.194385	0.158935	0.593723	0.771261	0.526849	0.175053	0.227235	0.285715	0.836138	0.77713	0.884876	ABCA1	ATP binding cassette subfamily A member 1
ENSG00000251595	4.56845	6.89942	8.46715	6.46423	4.43071	5.17521	9.02465	7.97768	3.29583	6.17276	6.66639	4.68381	5.90665	5.44028	4.7529	6.05085	4.86751	5.17643	ABCA11P	ATP binding cassette subfamily A member 11, pseudogene
ENSG00000144452	10.7595	10.7531	12.3673	32.1531	31.2888	31.9898	10.5951	10.5258	8.54233	34.4718	31.3856	24.709	3.75932	5.46494	7.1525	22.2617	22.9645	20.5632	ABCA12	ATP binding cassette subfamily A member 12
ENSG00000179869	0.321172	0.390792	0.33771	0.462068	0.68762	0.820714	0.282379	0.21912	0.297391	0.787653	0.874991	0.798237	1.59316	2.09126	2.22436	3.25385	4.45338	2.59956	ABCA13	ATP binding cassette subfamily A member 13
ENSG00000238098	0.187102	0.178987	0.045751	0.060908	0.149318	0.113064	0	0.103906	0.032039	0.053709	0.066511	0.104132	0.215041	0.08293	0.374773	0.401418	0.152204	0.22166	ABCA17P	ATP binding cassette subfamily A member 17, pseudogene
ENSG00000107331	65.4345	55.0773	59.9236	61.3184	63.1352	63.8406	64.6974	62.4169	66.6248	52.7465	56.9023	58.626	60.3361	51.2139	56.9444	47.4249	54.5731	54.2097	ABCA2	ATP binding cassette subfamily A member 2
ENSG00000167972	38.8814	35.4072	40.1366	39.9634	39.6377	41.0097	25.6239	26.2485	30.25	26.944	26.3234	23.1038	30.3704	36.609	38.2025	33.2772	36.6404	34.233	ABCA3	ATP binding cassette subfamily A member 3
ENSG00000198691	0.181025	0.200863	0.310102	0.305369	0.389936	0.354422	0.098448	0.095483	0.143099	0.323864	0.320775	0.23332	0.107549	0.132464	0.258493	0.778546	0.449178	0.213824	ABCA4	ATP binding cassette subfamily A member 4
ENSG00000154265	7.82524	10.7579	10.4228	24.6506	22.3866	23.5082	10.5459	9.624	5.61078	19.626	21.3149	21.0369	8.88712	7.45161	10.3341	26.7685	25.2545	24.2074	ABCA5	ATP binding cassette subfamily A member 5
ENSG00000064687	9.76601	10.8781	13.1007	12.3307	11.0079	13.1766	8.49424	7.38158	7.42889	10.0232	11.5678	9.82902	10.9858	10.5594	10.1769	12.8835	11.2993	11.8973	ABCA7	ATP binding cassette subfamily A member 7
ENSG00000135776	15.202	16.7748	17.0208	16.9419	15.6037	15.8589	15.1951	15.1908	13.1891	16.665	15.3845	14.8895	14.6333	15.5231	14.6272	18.0014	16.3871	16.0028	ABCB10	ATP binding cassette subfamily B member 10
ENSG00000073734	0.358549	0	0.357351	0.48564	0.694212	1.17495	0.485103	0.290555	0.340648	0.391087	0.461599	0.399385	0.186168	0	0.152789	0.900577	0.589172	0.76238	ABCB11	ATP binding cassette subfamily B member 11
ENSG00000005471	0.29663	0.232191	0.492158	0.435892	0.316766	0.566702	0.389327	0.281786	0.214568	0.36405	0.457506	0.718782	0.273027	0.263153	0.247761	0.448323	0.473689	0.324317	ABCB4	ATP binding cassette subfamily B member 4
ENSG00000115657	20.6734	21.1005	21.1875	11.5691	11.1934	10.5622	22.0625	22.6021	22.8556	12.2383	13.0591	13.2651	25.8908	24.336	26.0136	12.2286	11.92	11.8528	ABCB6	ATP binding cassette subfamily B member 6 (Langereis blood group)
ENSG00000131269	10.9509	12.5421	12.4909	10.852	10.0523	10.5041	11.3664	12.3441	11.3543	10.8541	10.0719	8.88513	10.6956	9.96262	10.4545	10.54	10.5186	10.2837	ABCB7	ATP binding cassette subfamily B member 7
ENSG00000197150	20.197	18.0203	18.1281	17.1278	18.6128	17.6883	17.2991	16.1509	19.6037	17.3031	17.011	15.6545	16.5002	16.3119	16.147	16.6949	18.0163	17.6255	ABCB8	ATP binding cassette subfamily B member 8
ENSG00000150967	8.72478	6.91269	7.52066	12.065	13.5181	13.2255	8.27508	8.43864	8.82083	10.8323	10.6732	11.75	6.9603	6.70635	6.95997	10.6027	10.1657	10.9427	ABCB9	ATP binding cassette subfamily B member 9
ENSG00000103222	11.7771	10.6127	12.3396	18.9512	19.0579	20.4467	13.3163	13.0848	14.1994	21.4914	21.7871	19.7777	10.114	12.172	13.8445	19.9543	24.8124	20.6906	ABCC1	ATP binding cassette subfamily C member 1
ENSG00000124574	8.79585	7.37734	7.56156	7.01929	8.39495	7.90653	8.68967	7.74092	9.27282	8.47107	7.74396	5.52416	7.06862	6.08958	7.11694	5.89295	8.51317	8.17702	ABCC10	ATP binding cassette subfamily C member 10
ENSG00000121270	88.8692	89.4484	94.6279	49.9823	50.0155	51.1364	80.2271	82.0797	79.1221	46.1775	40.724	36.3439	38.9667	42.9783	57.8545	38.3682	40.4706	37.3556	ABCC11	ATP binding cassette subfamily C member 11
ENSG00000140798	9.62731	8.54881	8.69815	7.67563	5.75974	7.44271	8.69826	6.78072	5.24023	3.98967	6.79412	4.99589	1.35235	1.61009	3.17084	4.90306	4.81488	4.62621	ABCC12	ATP binding cassette subfamily C member 12
ENSG00000243064	13.5478	16.5849	13.7306	6.10446	4.64679	6.58379	11.6207	13.3832	7.06086	4.3044	4.36163	6.02773	7.92108	7.06623	7.9155	4.2351	5.13156	3.64483	ABCC13	ATP binding cassette subfamily C member 13 (pseudogene)
ENSG00000023839	0.135229	0.21363	0.145722	0.347242	0.391385	0.438167	0.270449	0.147453	0.305336	0.654059	0.57369	0.794649	0.095319	0.097043	0.20998	0.393804	0.737025	0.495087	ABCC2	ATP binding cassette subfamily C member 2
ENSG00000108846	9.05488	7.4452	8.41177	9.8168	11.2024	9.82087	8.38429	6.27972	6.67118	10.4561	11.6625	7.30205	3.2646	3.28947	4.14673	10.3011	8.95909	8.34591	ABCC3	ATP binding cassette subfamily C member 3
ENSG00000125257	0.015011	0.184915	0.284114	0	0.060093	0.025385	0.183853	0.115889	0.354305	0.090484	0.07435	0.177037	0.075244	0.122743	0.274338	0.020198	0.252088	0.279705	ABCC4	ATP binding cassette subfamily C member 4
ENSG00000114770	34.8999	36.9829	34.8662	61.613	62.1282	62.6865	41.6456	35.9889	33.9632	60.7648	62.8833	56.8953	24.0826	26.2643	28.8798	65.9143	65.8166	64.9777	ABCC5	ATP binding cassette subfamily C member 5
ENSG00000091262	15.434	15.0733	16.3808	27.0823	27.5615	26.5838	18.305	15.6916	14.1441	20.8521	25.544	21.9457	16.2837	14.1673	15.4454	25.5038	26.0447	27.7173	ABCC6	ATP binding cassette subfamily C member 6
ENSG00000256340	11.7203	10.6384	12.5501	16.0143	15.8237	16.2035	12.0464	9.90187	10.2925	14.2829	14.3495	14.1313	12.068	10.4173	10.4475	16.7482	18.6167	14.9496	ABCC6P1	ATP binding cassette subfamily C member 6 pseudogene 1
ENSG00000255277	8.75019	8.2955	7.28916	10.9564	9.60301	10.3595	7.25702	8.43393	6.33542	7.71387	9.73011	8.72147	7.2596	8.58618	6.15882	9.62346	11.7102	11.4089	ABCC6P2	ATP binding cassette subfamily C member 6 pseudogene 2
ENSG00000006071	0.516493	0.450248	0.289578	0.630458	0.530108	0.309322	0.226407	0.325371	0.217307	0.772148	0.129033	0.16443	0.128878	0.160769	0.138212	0.264749	0.183287	0.171253	ABCC8	ATP binding cassette subfamily C member 8
ENSG00000101986	9.09551	7.73425	9.02691	11.3797	12.2431	12.3487	10.3849	10.7793	11.7513	12.9561	13.2765	11.8883	9.50108	10.8591	11.0883	11.7342	12.2073	12.6538	ABCD1	ATP binding cassette subfamily D member 1
ENSG00000117528	24.8975	30.532	33.3003	33.0327	31.3685	32.1074	27.2535	27.7656	20.4069	30.1912	29.3371	28.8678	24.6853	24.8371	25.845	31.2312	32.4629	29.6408	ABCD3	ATP binding cassette subfamily D member 3
ENSG00000119688	39.7533	38.075	33.1882	45.2007	50.7259	48.7934	38.2343	37.451	35.986	42.7312	45.9927	40.6271	29.0485	26.329	31.4561	44.8963	52.2509	43.3814	ABCD4	ATP binding cassette subfamily D member 4
ENSG00000164163	69.6561	71.068	80.9907	44.9399	41.4189	45.6367	72.5001	70.545	80.4185	45.854	46.3273	42.6242	53.2963	57.8375	57.0402	42.109	49.0632	41.7193	ABCE1	ATP binding cassette subfamily E member 1
ENSG00000204574	62.3772	63.5188	67.8819	68.8037	68.1459	69.4641	70.1603	69.1419	69.8336	77.2737	73.2324	75.1534	58.8544	65.4084	67.003	73.8243	67.2432	70.2482	ABCF1	ATP binding cassette subfamily F member 1
ENSG00000285292	18.6322	18.9172	18.4163	16.8875	17.2253	16.5207	20.0504	18.7439	16.1791	17.1815	17.4801	13.6173	13.5006	17.5713	20.0528	16.5368	16.255	17.373	ABCF2	ATP binding cassette subfamily F member 2
ENSG00000033050	16.3159	15.1721	15.8367	11.8819	14.6303	14.1569	16.2705	17.084	19.667	12.9102	11.8311	13.6153	13.298	15.1009	14.3747	10.8184	13.8085	12.5469	ABCF2	ATP binding cassette subfamily F member 2
ENSG00000161204	91.7351	85.1352	86.1531	103.149	107.534	105.277	92.4147	88.2334	102.787	103.925	105.064	108.206	87.3129	87.6681	86.0019	100.017	106.088	101.525	ABCF3	ATP binding cassette subfamily F member 3
ENSG00000160179	11.9846	11.5779	12.0257	21.5355	23.1803	23.1608	8.12547	8.72782	9.26655	13.1907	14.105	12.5989	10.1334	10.1515	12.1771	16.8035	20.5895	16.7388	ABCG1	ATP binding cassette subfamily G member 1
ENSG00000118777	0.381306	0.156891	0.355363	0.169899	0.09462	0.032388	0.428125	0.35812	0.342035	0.112687	0.066725	0.353606	0.13384	0.147808	0.184791	0.181208	0.081152	0.136976	ABCG2	ATP binding cassette subfamily G member 2 (Junior blood group)
ENSG00000172350	0.179526	0.168045	0.231457	0.125116	0.104043	0.042678	0.218171	0.190411	0.803611	0.058544	0.091204	0.382934	0.153718	0.084592	0.164454	0.050639	0.127833	0.088297	ABCG4	ATP binding cassette subfamily G member 4
ENSG00000143994	6.07957	5.87042	5.02074	5.87932	5.8642	6.02922	6.01028	4.52486	6.39338	6.13466	4.98142	4.81928	6.39347	6.33723	4.7456	7.28128	5.15269	6.2858	ABHD1	abhydrolase domain containing 1
ENSG00000144827	31.7972	35.893	36.1287	33.7639	30.3929	33.6447	35.2482	35.2356	33.9854	33.9944	31.1908	31.2982	29.5231	31.7093	30.5725	36.0355	32.213	34.2717	ABHD10	abhydrolase domain containing 10
ENSG00000106077	82.1549	81.1499	83.2363	108.329	120.159	119.733	82.7346	85.3138	94.6196	113.374	120.222	109.74	79.2575	79.4765	82.4003	114.834	117.929	116.019	ABHD11	abhydrolase domain containing 11
ENSG00000100997	64.6038	68.601	67.7069	114.548	122.578	118.86	70.5089	73.5954	74.6546	118.523	118.117	117.663	81.1956	82.4432	85.006	113.004	123.151	116.465	ABHD12	abhydrolase domain containing 12
ENSG00000131969	0.327275	0.408369	0.506888	1.64486	1.45561	2.49183	0.757889	0.662286	0.770167	2.54906	2.08245	2.7329	0.438069	0.267463	0.101966	1.68596	1.03152	0.947592	ABHD12B	abhydrolase domain containing 12B
ENSG00000139826	8.06775	8.05974	7.43119	10.0448	9.46445	9.64654	6.93404	7.25795	5.35572	8.21142	9.07326	8.11948	6.47288	6.80286	7.30786	9.90617	10.046	9.04154	ABHD13	abhydrolase domain containing 13
ENSG00000248487	5.40158	6.03892	6.35351	4.93165	6.49192	6.03085	6.36059	6.65548	6.9941	6.62701	7.69218	7.25012	6.79446	6.19228	5.31837	5.7447	5.68327	6.38331	ABHD14A	abhydrolase domain containing 14A
ENSG00000114786	0.681016	0.830491	0.922497	1.4511	1.13398	1.45684	0.83481	1.11106	1.45903	1.78578	1.26201	2.69171	0.864268	0.438909	2.46792	1.67115	1.27664	1.00837	ABHD14A-ACY1	ABHD14A-ACY1 readthrough
ENSG00000114779	78.0701	82.5795	85.084	86.0456	81.0238	83.1081	83.8771	85.0302	82.0881	85.0453	86.6506	79.5425	85.8773	88.6625	80.4725	76.6327	71.2521	80.2811	ABHD14B	abhydrolase domain containing 14B
ENSG00000168792	13.4465	13.8203	15.0385	14.1855	14.9414	14.1628	13.5525	15.3419	15.7045	16.5516	16.521	16.5238	12.653	13.3121	12.7189	14.9452	14.2022	15.2828	ABHD15	abhydrolase domain containing 15
ENSG00000204427	47.1277	47.0383	49.2587	63.9699	67.4781	65.5029	49.9419	50.9144	52.1642	58.1263	62.5147	61.7446	47.608	42.2187	44.0375	60.1622	60.1058	64.8826	ABHD16A	abhydrolase domain containing 16A
ENSG00000129968	54.8947	48.8168	48.2255	55.4672	61.7386	61.3888	54.6152	56.9608	69.5523	59.4464	58.8382	71.154	56.1326	56.6253	49.0448	54.3439	58.459	57.8281	ABHD17A	abhydrolase domain containing 17A
ENSG00000107362	6.99139	8.3633	9.44521	11.1707	9.88892	11.2691	7.2643	8.41461	8.26809	10.7935	11.0154	10.8797	8.49779	7.92433	7.85628	11.4505	12.469	10.7369	ABHD17B	abhydrolase domain containing 17B
ENSG00000136379	13.8874	13.7018	14.8765	17.365	16.9574	17.2862	14.4538	15.0327	11.9299	15.8118	15.1497	16.1176	12.3678	12.5083	12.6983	19.0425	17.774	16.6132	ABHD17C	abhydrolase domain containing 17C
ENSG00000164074	9.14593	8.68235	9.20631	8.87339	9.68776	9.12751	8.64927	7.37887	6.11579	9.29956	8.55271	7.76782	6.68118	5.81195	6.68094	8.82039	9.47627	9.43495	ABHD18	abhydrolase domain containing 18
ENSG00000140526	22.9819	21.8175	23.7409	19.0818	19.3562	19.399	24.3907	21.163	27.1411	18.9743	19.6794	15.2968	16.2367	20.6996	23.084	17.8457	19.365	20.8617	ABHD2	abhydrolase domain containing 2
ENSG00000158201	11.0912	13.373	13.8377	21.2223	18.437	20.2231	11.9007	11.5882	8.6209	18.972	16.6563	16.4775	9.05687	8.49472	7.59267	20.274	18.6079	19.4456	ABHD3	abhydrolase domain containing 3
ENSG00000100439	10.9282	9.27298	10.2876	14.2544	15.2872	16.2983	12.4316	11.45	15.0988	17.783	17.6194	15.3599	11.8584	11.0539	14.2701	16.598	18.4047	18.711	ABHD4	abhydrolase domain containing 4
ENSG00000011198	40.2829	43.7137	51.5008	58.407	56.4891	53.1957	47.9434	46.447	38.4505	56.0378	55.3994	51.3915	35.4406	41.789	41.7264	53.9574	52.7514	53.3198	ABHD5	abhydrolase domain containing 5
ENSG00000163686	3.75485	3.82892	3.85168	2.74089	2.57488	2.92013	2.85838	3.32116	3.28022	3.4265	3.02383	3.34316	3.36903	3.33271	3.44053	2.28894	2.68476	2.60381	ABHD6	abhydrolase domain containing 6
ENSG00000127220	14.9538	14.1375	14.7348	13.6171	15.0217	15.9926	13.2243	14.5189	16.7014	15.2497	15.8358	17.6758	15.5688	15.62	15.0724	14.2908	13.2212	14.0866	ABHD8	abhydrolase domain containing 8
ENSG00000136754	31.1165	36.1407	34.6633	44.2577	45.0666	43.7485	34.9095	33.3087	31.9448	44.1732	43.923	39.7591	27.6641	29.3271	31.614	47.3202	44.0701	44.3883	ABI1	abl interactor 1
ENSG00000138443	46.6269	47.7445	44.2617	31.9238	41.5417	35.6579	46.9266	46.0922	46.9693	36.0627	37.9015	32.5998	35.7702	37.7251	44.0875	27.9113	38.04	34.7698	ABI2	abl interactor 2
ENSG00000154175	0.083638	0.079669	0.298399	0.213023	0.146575	0.0818	0.213094	0.167672	0.108845	0.199879	0.258906	0.596123	0.036908	0.074084	0.069295	0.10892	0.228679	0.930369	ABI3BP	ABI family member 3 binding protein
ENSG00000119328	28.2663	35.5026	32.1162	41.0622	41.8647	41.1127	33.555	34.18	23.1211	41.5675	43.9021	39.588	26.1089	27.4915	27.2442	39.5184	38.9042	39.8746	ABITRAM	actin binding transcription modulator
ENSG00000097007	34.907	34.0227	37.5742	37.9249	40.5842	38.959	32.6573	37.2667	35.0005	42.2141	41.5936	33.4327	30.3448	36.6174	40.374	38.9804	42.9118	36.994	ABL1	ABL proto-oncogene 1, non-receptor tyrosine kinase
ENSG00000143322	5.9958	6.03843	6.95599	6.57854	6.16789	6.3934	6.65175	6.48997	5.31222	7.42457	6.69527	5.07379	4.23505	5.88127	7.23266	7.00626	8.07018	7.22973	ABL2	ABL proto-oncogene 2, non-receptor tyrosine kinase
ENSG00000099204	22.5185	24.8205	25.773	22.3561	22.2943	22.4229	22.2586	21.104	20.6578	24.6598	20.2396	17.2028	13.74	18.7203	20.7194	18.4586	20.3305	19.5388	ABLIM1	actin binding LIM protein 1
ENSG00000173210	2.82922	3.23098	3.81101	7.20843	7.50923	8.2915	2.43097	2.11239	2.16624	6.34213	6.22997	5.59107	3.89778	4.64153	4.94404	7.90283	9.97271	8.27362	ABLIM3	actin binding LIM protein family member 3
ENSG00000159842	27.1129	25.8159	28.0838	37.5888	39.3846	37.7527	25.8834	25.6201	29.7587	39.1141	35.6359	32.4607	21.1164	26.4009	27.8916	37.4878	38.9956	36.8823	ABR	ABR activator of RhoGEF and GTPase
ENSG00000146386	38.707	36.069	37.4945	56.5619	57.4985	54.0468	35.089	32.93	42.2338	51.1501	48.2018	54.2342	36.7622	37.4029	34.6007	69.6055	66.7848	69.9991	ABRACL	ABRA C-terminal like
ENSG00000163322	8.00014	10.369	9.55246	9.15235	9.1368	10.2026	10.0392	9.98523	6.77864	9.35231	9.94331	9.15082	7.96785	8.21678	8.12161	9.70832	9.89504	9.45335	ABRAXAS1	abraxas 1, BRCA1 A complex subunit
ENSG00000165660	11.2371	12.7606	12.9119	12.8739	12.2616	12.4514	13.3611	12.9825	10.1642	13.3299	13.2576	11.8925	10.5796	11.7453	11.4763	13.0991	13.5988	12.9274	ABRAXAS2	abraxas 2, BRISC complex subunit
ENSG00000146109	23.6132	21.7638	21.5141	21.4696	24.3623	22.7284	19.0466	19.9596	31.4948	18.7827	17.8635	19.4049	19.2216	19.4593	17.339	19.9559	20.4108	20.8945	ABT1	activator of basal transcription 1
ENSG00000114626	3.94315	3.19637	3.20741	5.39203	6.30042	7.12538	3.4846	3.65782	3.61782	5.11602	5.62078	5.27477	3.16081	2.35244	2.49329	4.94109	5.86715	5.13314	ABTB1	ankyrin repeat and BTB domain containing 1
ENSG00000166016	6.54874	6.717	7.36829	11.3358	11.499	11.6391	7.60511	6.86393	7.96624	11.1097	11.6691	10.4261	6.44658	6.91836	7.58393	12.2491	13.4925	12.9266	ABTB2	ankyrin repeat and BTB domain containing 2
ENSG00000060971	48.4036	48.6994	48.561	76.2056	79.703	82.1932	48.8321	50.6068	50.3738	75.3786	80.8138	82.916	56.2827	53.6695	53.768	78.3697	86.7522	83.635	ACAA1	acetyl-CoA acyltransferase 1
ENSG00000167315	40.0763	44.1072	45.9516	29.5212	29.4164	29.6245	35.2348	39.3068	34.6812	28.4108	27.5174	25.7008	36.6927	37.2807	37.322	25.7782	25.443	28.1633	ACAA2	acetyl-CoA acyltransferase 2
ENSG00000278540	52.8588	57.5921	61.0294	72.981	78.8029	77.9036	61.2535	60.213	64.6318	69.0605	71.2015	57.243	59.9709	71.4544	76.8838	79.5158	90.1094	80.4011	ACACA	acetyl-CoA carboxylase alpha
ENSG00000076555	2.79191	1.96411	2.31544	1.1232	1.63574	1.59804	2.3493	2.72238	3.10446	1.644	1.81555	1.13381	1.91552	1.47707	2.03641	1.50465	1.79431	1.59927	ACACB	acetyl-CoA carboxylase beta
ENSG00000111271	30.7578	30.6859	32.5177	31.024	33.3977	29.7988	35.7316	32.8313	39.6563	33.4866	36.9777	34.686	27	26.9732	29.4764	31.8333	35.9275	32.2115	ACAD10	acyl-CoA dehydrogenase family member 10
ENSG00000240303	10.2497	9.46814	11.9976	12.5506	14.5423	13.9657	10.5073	10.2733	9.18045	15.4088	15.8267	11.9382	8.9744	9.30532	9.58469	15.7128	12.6712	12.9145	ACAD11	acyl-CoA dehydrogenase family member 11
ENSG00000151498	44.5055	43.9425	44.8592	47.5508	49.5844	48.5218	42.554	43.4211	40.3269	42.7112	46.2068	48.3808	37.0114	34.6709	34.6434	43.9307	50.1637	43.957	ACAD8	acyl-CoA dehydrogenase family member 8
ENSG00000177646	48.1841	50.7265	54.5275	50.6165	53.6382	52.3004	48.9767	46.137	51.5483	47.3908	45.6512	44.3694	46.1541	47.2715	47.7593	50.1328	50.4505	49.5436	ACAD9	acyl-CoA dehydrogenase family member 9
ENSG00000117054	32.298	31.6279	33.0443	46.7053	41.2929	41.3095	28.3156	28.3479	20.8882	40.8885	35.718	36.9948	27.454	24.9761	22.7668	40.3621	37.3164	39.2161	ACADM	acyl-CoA dehydrogenase medium chain
ENSG00000122971	12.2004	9.71834	10.0834	16.3679	16.7385	16.0143	10.6629	10.7853	13.8067	14.3703	14.0803	16.6961	12.8967	12.3808	12.0139	13.2754	13.9323	13.3802	ACADS	acyl-CoA dehydrogenase short chain
ENSG00000196177	20.1049	25.745	25.1299	23.9718	22.4852	23.0783	25.3034	22.502	12.0707	24.0301	24.7678	20.0799	19.7101	23.2534	24.2314	27.333	29.1518	23.4705	ACADSB	acyl-CoA dehydrogenase short/branched chain
ENSG00000072778	179.877	161.944	160.639	226.077	248.531	255.209	153.437	146.288	168.765	186.738	222.007	210.287	139.975	135.754	136.191	184.177	196.1	208.034	ACADVL	acyl-CoA dehydrogenase very long chain
ENSG00000072818	11.7011	11.0008	14.6011	13.0514	14.3244	14.5988	9.6851	11.0927	12.9077	15.3941	15.1851	13.7875	12.103	9.94511	9.71719	13.9464	15.2225	14.5988	ACAP1	ArfGAP with coiled-coil, ankyrin repeat and PH domains 1
ENSG00000114331	44.0488	50.1511	53.2704	41.9138	37.0093	39.2546	46.2808	48.935	36.9374	41.7221	46.2667	35.3651	30.1428	31.673	39.3337	41.0762	44.0419	42.2621	ACAP2	ArfGAP with coiled-coil, ankyrin repeat and PH domains 2
ENSG00000131584	23.4136	15.7395	19.5697	21.8141	25.0567	23.0126	18.0934	19.412	19.4348	22.7734	23.947	22.1722	14.4575	11.5315	14.1988	25.3839	24.1025	26.6382	ACAP3	ArfGAP with coiled-coil, ankyrin repeat and PH domains 3
ENSG00000075239	127.139	151.707	149.771	138.064	122.81	129.327	146.932	146.304	123.479	142.069	141.188	145.468	169.612	159.203	147.242	147.658	143.791	154.484	ACAT1	acetyl-CoA acetyltransferase 1
ENSG00000120437	76.3851	86.6963	86.1765	40.2746	38.6242	38.8633	87.9201	90.5068	90.1972	43.6071	43.5204	43.5194	86.8157	86.6525	80.7685	44.5668	49.2255	44.4596	ACAT2	acetyl-CoA acetyltransferase 2
ENSG00000182827	39.4569	48.049	50.7234	62.0576	56.823	59.5731	47.5326	47.7233	42.8044	66.7919	61.8659	56.3552	45.7107	45.9714	47.322	59.9267	62.4831	63.1218	ACBD3	acyl-CoA binding domain containing 3
ENSG00000234478	0.525855	0.691804	1.18407	1.1374	1.5576	0.866677	0.796191	0.799204	0.380624	1.16622	2.19803	1.67707	0.33816	0.500637	0.729269	1.23332	1.0385	0.896031	ACBD3-AS1	ACBD3 antisense RNA 1
ENSG00000181513	21.1381	18.4478	20.0378	24.6927	27.5809	28.1007	19.0578	19.2201	21.1179	23.0212	25.6626	23.8097	19.6735	17.9478	17.9036	22.7275	23.411	22.9623	ACBD4	acyl-CoA binding domain containing 4
ENSG00000107897	15.3174	16.4614	18.0532	13.932	14.8852	14.5047	16.1084	15.3101	13.7254	16.7553	15.0015	14.0474	10.8018	11.3133	12.9622	16.2902	14.2709	14.845	ACBD5	acyl-CoA binding domain containing 5
ENSG00000230124	63.7851	67.4454	69.6586	54.9956	54.9573	58.3442	66.1028	65.0859	62.4437	56.4928	58.5907	59.2451	73.3781	68.8163	60.3069	62.1633	62.8886	57.9291	ACBD6	acyl-CoA binding domain containing 6
ENSG00000176244	10.6772	12.1142	12.869	9.26088	8.32099	9.70797	12.6679	13.3228	9.67074	8.87542	9.76137	8.1644	12.6902	12.0024	12.3833	8.73921	8.21712	7.4056	ACBD7	acyl-CoA binding domain containing 7
ENSG00000110455	16.702	14.9137	11.5434	20.4073	25.6426	20.737	15.6968	12.2119	9.81721	14.8615	22.5236	17.5903	7.09593	5.11055	7.49393	14.3121	17.2721	16.5131	ACCS	1-aminocyclopropane-1-carboxylate synthase homolog (inactive)
ENSG00000102977	27.9193	24.5673	27.4576	16.6824	18.8163	17.729	28.0182	28.5602	33.5938	16.1367	17.185	21.049	24.9277	24.5908	21.4991	14.6461	16.9433	16.4853	ACD	ACD shelterin complex subunit and telomerase recruitment factor
ENSG00000159640	5.08197	4.09848	5.47856	1.97266	2.45749	2.25028	3.71772	3.71472	4.42265	1.83056	1.7551	1.77704	2.52194	3.18374	2.69657	1.67587	1.39209	2.41299	ACE	angiotensin I converting enzyme
ENSG00000130234	0.027378	0.071561	0.07858	0.044286	0.220603	0.217974	0	0.017804	0	0.156379	0.337957	0.128079	0.023272	0	0.026075	0.354852	0.448438	0.297915	ACE2	angiotensin I converting enzyme 2
ENSG00000167769	4.7837	4.77342	5.91263	3.45247	3.83469	3.18336	6.51821	6.63121	7.75273	3.34434	3.50004	3.48533	6.75015	6.39045	6.63089	4.43124	4.57559	4.49655	ACER1	alkaline ceramidase 1
ENSG00000177076	3.80084	4.97084	5.12697	6.1124	6.28854	7.21274	4.81415	4.90392	3.63869	7.0073	6.86351	5.44335	3.72141	4.32426	4.64777	7.52856	10.3243	8.02438	ACER2	alkaline ceramidase 2
ENSG00000078124	24.9921	34.9816	38.5473	11.4944	10.546	10.7823	32.9231	31.9399	20.3014	15.4286	14.6148	9.75239	20.9166	26.5144	29.7143	14.9592	18.188	14.4351	ACER3	alkaline ceramidase 3
ENSG00000087085	0.337069	0.314003	0.221439	0.33731	0.463352	0.258906	0.326995	0.307715	0.448375	0.349025	0.495645	0.398624	0.498	0.579231	0.511804	0.990908	1.44128	1.0779	ACHE	acetylcholinesterase (Cartwright blood group)
ENSG00000100813	63.5903	58.0474	58.3981	57.2972	57.9316	64.4618	68.207	62.2274	60.1784	63.8932	67.4653	57.28	43.3929	44.4468	51.805	61.3224	64.5306	65.2118	ACIN1	apoptotic chromatin condensation inducer 1
ENSG00000144648	5.15323	3.59197	4.76933	11.7067	12.3545	15.0859	5.34321	5.19144	4.99649	15.2164	14.3032	10.769	1.07155	1.7168	2.11437	3.54141	3.4607	1.89567	ACKR2	atypical chemokine receptor 2
ENSG00000144476	0.037505	0.040463	0.059427	0.504154	0.734538	0.346362	0	0.03195	0.100158	0.207684	0.285952	0.238227	0.210137	0.116381	0.195366	0.475794	0.531689	0.86596	ACKR3	atypical chemokine receptor 3
ENSG00000131473	204.442	199.796	222.965	201.106	215.562	224.326	205.672	212.714	223.704	210.503	205.652	185.295	173.243	203.864	219.389	225.579	257.489	226.253	ACLY	ATP citrate lyase
ENSG00000122729	14.9781	15.5661	17.815	27.502	25.9973	26.3042	16.395	16.339	14.2255	25.6835	24.5957	24.6562	19.793	22.0554	21.9826	26.9265	29.2902	27.0919	ACO1	aconitase 1
ENSG00000100412	64.8683	61.3457	67.6039	58.9616	61.6172	60.4179	62.0612	63.2882	73.0847	61.4399	59.6973	58.7953	62.7041	66.4038	65.9803	56.0506	59.744	56.2389	ACO2	aconitase 2
ENSG00000184227	55.2317	58.5565	56.5452	83.7324	94.2015	97.0624	60.1452	62.424	66.4119	78.7023	84.1152	85.3978	67.1068	65.2134	68.2597	100.147	119.623	102.954	ACOT1	acyl-CoA thioesterase 1
ENSG00000162390	0.370971	0.369313	0.391893	0.130243	0.09221	0.318693	0.386552	0.350763	0.493882	0.136268	0.16251	0.106153	0.295115	0.266066	0.403697	0.177377	0.202485	0.188496	ACOT11	acyl-CoA thioesterase 11
ENSG00000112304	23.2891	28.2161	27.2295	17.8067	18.2028	21.5299	27.3554	29.4455	22.1059	20.1405	22.9933	22.3803	29.5318	26.5599	25.9097	23.1795	21.2582	22.7723	ACOT13	acyl-CoA thioesterase 13
ENSG00000119673	75.9861	78.3063	78.3532	70.2752	72.4306	71.6206	70.5596	73.7809	75.7495	59.2133	58.618	66.1214	68.8107	69.2879	70.4925	65.6029	63.4601	65.9626	ACOT2	acyl-CoA thioesterase 2
ENSG00000177465	59.972	62.2059	62.4141	68.4238	74.5104	71.2588	57.1017	60.883	68.4004	59.8614	59.8077	62.0782	68.5405	66.7588	66.5147	62.8723	67.2489	66.466	ACOT4	acyl-CoA thioesterase 4
ENSG00000205669	2.56909	2.97596	2.19403	6.83094	5.50968	6.4079	3.40562	2.80503	1.93528	5.45471	5.11978	5.68141	2.25326	2.7505	2.51693	5.04416	4.99483	5.28435	ACOT6	acyl-CoA thioesterase 6
ENSG00000097021	77.4643	75.7561	77.8186	46.7445	49.0622	51.1502	66.3284	70.7989	82.9512	44.393	45.4366	47.9722	71.0353	69.7717	64.355	43.0578	46.6152	44.0722	ACOT7	acyl-CoA thioesterase 7
ENSG00000101473	44.8064	50.5067	44.5415	64.2156	63.3401	63.1874	48.7354	50.326	55.0651	59.7542	58.6931	69.6338	55.9235	51.4477	47.3635	56.2304	58.139	62.3797	ACOT8	acyl-CoA thioesterase 8
ENSG00000123130	40.8093	45.1231	44.6691	76.7983	75.1234	80.5345	41.4968	42.8984	34.0935	75.7272	74.3674	74.3098	43.0458	42.8883	40.9862	84.5641	88.7755	78.542	ACOT9	acyl-CoA thioesterase 9
ENSG00000161533	57.7152	60.4591	61.928	88.9574	90.3082	90.6508	58.1733	58.8713	65.1028	92.5164	90.9463	85.2646	58.7956	65.1755	70.5926	95.6336	102.216	95.5989	ACOX1	acyl-CoA oxidase 1
ENSG00000168306	55.6993	60.3752	60.8695	1.32977	0.988605	0.670267	76.7909	77.8836	73.6906	1.16823	2.2672	1.45932	52.683	49.6901	45.7743	1.07035	0.612118	1.10068	ACOX2	acyl-CoA oxidase 2
ENSG00000087008	11.4561	10.0325	11.0717	18.1379	17.5113	17.0864	8.50278	9.91795	10.949	17.0285	14.7909	16.6803	9.86728	11.0889	11.5718	17.8935	17.7854	18.8676	ACOX3	acyl-CoA oxidase 3, pristanoyl
ENSG00000143727	94.7334	103.477	115.302	104.936	99.019	103.5	95.9998	94.858	100.993	90.8855	95.4009	98.6685	95.7297	94.7586	88.8533	98.1312	90.0785	95.3213	ACP1	acid phosphatase 1
ENSG00000134575	44.2859	41.089	42.1689	46.8558	46.2057	46.119	44.8857	44.6556	47.91	47.347	47.1831	49.4776	48.0412	47.907	47.8575	45.3188	49.9787	48.025	ACP2	acid phosphatase 2, lysosomal
ENSG00000102575	0.023595	0.085947	0.125863	0.186824	0.27103	0.15932	0	0	0	0.212225	0.172676	0	0.470154	0.040899	0	0.60802	0.186508	0.114511	ACP5	acid phosphatase 5, tartrate resistant
ENSG00000162836	24.9463	25.6957	24.6848	25.4316	27.1614	25.5869	25.9293	25.2038	22.303	23.4949	25.1109	24.0205	23.2017	24.072	23.6776	27.4427	26.4996	27.131	ACP6	acid phosphatase 6, lysophosphatidic
ENSG00000183760	1.11165	0.844424	0.826307	0.392109	0.353118	0.421089	0.835868	0.714352	1.02296	0.313636	0.84788	0.38353	0.761434	0.68988	0.762629	0.419375	0.598635	0.372467	ACP7	acid phosphatase 7, tartrate resistant (putative)
ENSG00000014257	0.272205	0.372708	0.647599	0.426942	0.41628	0.594579	0.428937	0.773404	0.380477	0.918287	0.617495	0.331564	0.209398	0.230705	0.370322	0.393727	0.332036	0.53779	ACPP	acid phosphatase, prostate
ENSG00000111644	0.152553	0	0.050642	0.28138	0.120591	0.232778	0.020021	0.03593	0.158993	0.07903	0.175112	0.305669	0.038727	0	0.085453	0.204437	0.237781	0.26685	ACRBP	acrosin binding protein
ENSG00000103740	0.126793	0.123679	0.442976	0.17088	0.158855	0.287976	0.272984	0.207205	0.223441	0.149667	0.338443	0.126788	0.350032	0.205319	0.164588	0.159096	0.137478	0.142864	ACSBG1	acyl-CoA synthetase bubblegum family member 1
ENSG00000130377	0.165312	0.130947	0.055834	0.274814	0.094654	0.112932	0.067288	0.105803	0.10084	0.088293	0.127594	0.185962	0.113713	0.067401	0.093144	0.22504	0	0.186929	ACSBG2	acyl-CoA synthetase bubblegum family member 2
ENSG00000167107	31.6628	25.9559	27.5221	31.4531	37.0788	36.1749	30.2843	30.2285	29.1705	41.1941	42.9199	40.8539	25.4422	22.7316	23.8006	38.3326	40.9351	36.3247	ACSF2	acyl-CoA synthetase family member 2
ENSG00000176715	22.634	20.2044	20.2394	25.6895	27.8702	27.8226	21.2752	21.9646	24.8471	24.498	23.1476	23.0823	20.4345	21.2397	23.8324	26.0604	27.3928	27.4102	ACSF3	acyl-CoA synthetase family member 3
ENSG00000151726	39.5285	46.3877	49.6074	108.448	104.559	111.442	52.1446	52.2698	44.6803	120.113	115.547	109.342	50.5573	51.0169	53.147	149.309	159.738	147.174	ACSL1	acyl-CoA synthetase long chain family member 1
ENSG00000123983	63.805	88.6369	84.313	78.4889	71.968	79.1503	83.6329	78.9686	58.0427	74.2508	79.0285	64.6167	75.73	82.0271	87.8138	79.1741	88.5301	77.1252	ACSL3	acyl-CoA synthetase long chain family member 3
ENSG00000068366	0.392011	0.477234	0.720615	1.31597	1.18582	1.25451	1.03693	1.19385	0.795578	1.94485	1.72617	1.7353	0.912358	1.08421	1.07799	2.32025	2.61023	2.3581	ACSL4	acyl-CoA synthetase long chain family member 4
ENSG00000164398	0.48872	0.348255	0.666213	1.58285	1.43878	1.59775	0.598192	0.5571	0.882052	1.25087	1.48514	1.10163	1.62697	1.90882	1.82941	2.0657	1.79342	2.10708	ACSL6	acyl-CoA synthetase long chain family member 6
ENSG00000166743	1.63544	1.43629	1.76376	2.15005	1.75863	2.01403	1.08622	1.28711	1.02301	2.14883	1.90158	1.9096	1.92837	1.60499	1.58112	1.58676	2.11028	2.15956	ACSM1	acyl-CoA synthetase medium chain family member 1
ENSG00000005187	2.66302	3.03852	3.5854	2.19846	1.70888	2.11843	4.15843	4.21253	3.9739	3.30639	3.56214	3.38172	2.69819	2.63103	2.42904	2.34486	2.58636	2.34416	ACSM3	acyl-CoA synthetase medium chain family member 3
ENSG00000154930	27.9735	27.1639	29.7209	52.5361	57.1393	53.7519	23.9412	24.6387	24.633	40.7303	40.1634	41.6116	27.9018	27.5565	28.697	48.7771	50.6616	55.0216	ACSS1	acyl-CoA synthetase short chain family member 1
ENSG00000131069	30.8165	31.1418	32.9022	38.6345	45.8346	47.6488	32.5568	31.8024	33.6638	44.7998	42.5643	43.0342	31.4404	34.0844	37.1901	46.3466	49.7043	47.4247	ACSS2	acyl-CoA synthetase short chain family member 2
ENSG00000111058	6.1692	7.20626	6.84264	6.44212	6.84979	6.28702	8.24967	7.73844	8.21312	9.23818	9.29737	8.09961	7.38139	7.49407	7.68694	7.51524	7.28007	9.25744	ACSS3	acyl-CoA synthetase short chain family member 3
ENSG00000143632	0.109182	0.053869	0.05268	0.169248	0.161539	0.162953	0.145005	0.172862	0.140982	0.126067	0.129927	0.118996	0.158913	0.079604	0.066974	0.123623	0.068865	0.634631	ACTA1	actin alpha 1, skeletal muscle
ENSG00000107796	24.2052	26.4987	28.625	17.5198	17.2208	17.9499	18.5046	18.4134	18.3058	18.0435	16.7282	18.6799	18.509	20.4868	21.11	18.4302	17.6546	56.331	ACTA2	actin alpha 2, smooth muscle
ENSG00000075624	4688.94	4269.81	4774.05	4888.09	5085.97	5131.88	4017.48	4187.24	4983.11	4575.91	4601.31	4648.52	4664.94	4925.36	5079.85	4202.51	4814.6	4569.06	ACTB	actin beta
ENSG00000169067	0.018635	0	0.015737	0.013499	0.017768	0.078762	0	0.037607	0.021075	0.035296	0.044026	0.146306	0	0	0.062029	0.034038	0.042887	1.47474	ACTBL2	actin beta like 2
ENSG00000159251	0.16598	0.143149	0.13365	0.051154	0.110263	0.078378	0.095907	0.130208	0.063404	0.410813	0.082729	0.136995	0	0.081343	0.145227	0	0.15278	0.307135	ACTC1	actin alpha cardiac muscle 1
ENSG00000184009	2288.08	2117.65	2286.32	1511.89	1587.88	1625.67	1919.49	2018.48	2282.97	1537.65	1457	1494.43	2024.32	2164.78	2053.3	1392.64	1568.17	1458.16	ACTG1	actin gamma 1
ENSG00000259315	1.00886	1.0387	1.01974	2.22592	1.54919	1.18753	1.18995	0.985714	1.31558	1.19404	1.58696	1.27316	1.69559	0.708072	0.767379	0.890013	0.818215	1.5892	ACTG1P17	actin gamma 1 pseudogene 17
ENSG00000163017	0.067525	0.077336	0.190274	0.09221	0.111127	0.28532	0	0.04123	0.071871	0.032382	0.026655	0.684916	0.023802	0.039293	0.193321	0	0.143422	12.2901	ACTG2	actin gamma 2, smooth muscle
ENSG00000182584	2.91639	3.47438	3.83571	9.60254	9.9618	8.55083	2.84069	3.41254	3.79501	9.07808	8.05467	10.2528	4.82961	4.74927	3.66505	7.3468	7.71089	7.83539	ACTL10	actin like 10
ENSG00000136518	232.568	258.578	250.475	179.045	176.38	182.614	229.339	237.117	190.488	154.35	154.177	149.994	184.412	189.923	199.626	155.104	164.395	159.785	ACTL6A	actin like 6A
ENSG00000117148	0.270964	0.270639	0.244432	0.041607	0.040095	0.019996	0.297046	0.332529	0.311877	0.027159	0.067075	0.025795	0.249234	0.181398	0.154566	0	0	0.069148	ACTL8	actin like 8
ENSG00000072110	108.258	103.639	114.585	74.4498	80.4566	83.1441	97.0611	105.542	113.673	86.0381	81.8166	72.5772	75.1379	84.3979	88.4189	75.5595	87.8507	80.212	ACTN1	actinin alpha 1
ENSG00000259062	0.668182	0.388745	0.380518	0.396063	0.424361	0.331316	0.53709	0.41746	0.472853	0.261514	0.801819	0.564339	0.692273	0.490339	0.357623	0.61608	0.537272	0.409159	ACTN1-AS1	ACTN1 antisense RNA 1
ENSG00000077522	5.61586	6.02595	5.60155	2.99967	3.03381	2.63022	4.1081	4.93626	4.94565	2.84255	2.05143	2.13969	1.26859	1.21519	1.10087	0.547708	0.539882	0.306373	ACTN2	actinin alpha 2
ENSG00000130402	202.222	182.268	208.292	244.788	282.309	284.089	205.635	196.066	221.976	269.75	258.068	218.443	154.735	198.991	210.1	232.178	271.821	264.493	ACTN4	actinin alpha 4
ENSG00000131966	95.4941	118.665	112.33	180.404	139.069	157.423	103.097	112.146	91.7287	154.133	154.122	148.765	102.988	101.442	100.078	173.61	156.098	161.864	ACTR10	actin related protein 10
ENSG00000138107	133.194	130.197	133.866	142.791	145.76	147.582	125.483	126.381	135.021	127.841	136.47	131.59	125.385	131.561	130.602	138.248	150.011	145.682	ACTR1A	actin related protein 1A
ENSG00000115073	45.307	45.1405	45.6313	63.4609	68.6801	67.1034	44.6539	43.1253	47.4343	55.1018	56.4084	55.3998	44.2841	43.339	42.5234	60.0478	61.8995	63.5271	ACTR1B	actin related protein 1B
ENSG00000138071	115.745	145.801	153.278	153.613	141.697	147.527	143.429	142.377	94.7431	155.847	153.393	139.987	130.081	143.394	144.536	152.794	154.055	145.847	ACTR2	actin related protein 2
ENSG00000115091	95.8025	105.492	110.943	131.891	118.684	120.342	103.431	106.701	88.0179	122.28	119.234	113.756	110.051	116.061	118.982	129.609	132.652	137.781	ACTR3	actin related protein 3
ENSG00000133627	11.9091	13.5248	13.2987	8.3666	9.08982	9.16551	13.4852	12.8528	10.0821	10.1649	8.86416	10.1399	11.8092	10.9641	11.9571	8.16543	8.26165	9.41423	ACTR3B	actin related protein 3B
ENSG00000106526	7.14536	5.64424	7.60397	18.0355	15.1312	15.8585	6.26924	5.95398	5.72744	13.6731	18.1872	15.5401	5.47562	5.42749	7.77724	17.2796	16.7118	17.9892	ACTR3C	actin related protein 3C
ENSG00000101442	11.0246	11.4878	12.6341	9.17238	9.29517	9.11243	11.8691	12.0868	12.528	9.05335	9.46663	8.55667	11.3094	10.8648	10.1308	9.14355	8.91319	9.43196	ACTR5	actin related protein 5
ENSG00000075089	45.9578	47.5575	47.6835	60.2559	60.8414	51.9746	50.6316	51.6897	33.9537	66.3475	60.4073	67.3811	48.6485	44.106	47.2295	61.52	53.4247	59.3393	ACTR6	actin related protein 6
ENSG00000113812	10.0083	10.1978	11.2214	11.0013	12.5142	13.4158	11.3591	10.2809	12.21	10.9178	11.7108	10.2439	8.73243	9.40625	10.8386	13.9728	11.3	12.7085	ACTR8	actin related protein 8
ENSG00000184378	1.50188	2.04582	2.04689	2.11762	1.73254	1.88095	2.52544	2.97524	2.59342	2.55557	2.59504	2.99353	1.6262	1.77886	1.84052	1.64963	2.0246	1.83524	ACTRT3	actin related protein T3
ENSG00000115170	5.17062	5.4259	5.76132	10.2951	10.4106	10.9719	5.94456	6.15536	5.83178	11.2061	11.0222	10.9296	5.05756	5.10182	5.28119	10.3675	11.4309	10.6203	ACVR1	activin A receptor type 1
ENSG00000135503	19.7629	19.5629	22.2794	26.5734	27.4315	27.774	21.3375	19.847	20.3163	27.8473	27.8916	24.6589	17.5372	19.8272	20.9322	26.0744	27.9797	26.6144	ACVR1B	activin A receptor type 1B
ENSG00000121989	2.01884	3.02644	4.00187	3.0769	4.01038	2.39874	3.02427	2.904	3.77333	5.11242	3.03608	3.16504	2.80332	2.34484	3.96357	2.77093	2.57602	3.58376	ACVR2A	activin A receptor type 2A
ENSG00000114739	1.88445	1.64689	2.1492	0.90356	1.27804	1.05527	1.49308	1.68179	1.75354	1.20407	1.12795	0.863594	1.09744	0.953081	1.32714	0.89735	1.07168	1.01781	ACVR2B	activin A receptor type 2B
ENSG00000229589	0.413828	0.380551	0.592162	0.681667	0.467997	0.69206	0.499478	0.506246	0.369621	0.638186	0.682547	0.42854	0.27824	0.367463	0.300707	0.536694	0.641782	0.653813	ACVR2B-AS1	ACVR2B antisense RNA 1
ENSG00000243989	63.5894	61.2478	62.9781	79.83	84.3967	78.0914	72.398	75.3221	85.3881	81.1683	87.4944	87.0086	69.7629	66.1463	64.184	80.4394	82.6703	82.774	ACY1	aminoacylase 1
ENSG00000132744	0.245838	0.519222	0.233258	1.46387	1.29241	1.67602	0.546838	0.300574	0.253313	1.7189	1.25877	1.54656	0.556034	0.381758	0.224585	1.93685	1.76127	1.73512	ACY3	aminoacylase 3
ENSG00000119640	28.9587	36.6788	36.2002	33.6231	32.8194	30.8266	30.8181	32.2614	28.2222	28.355	30.8269	28.3409	24.383	21.1107	24.7055	30.0316	28.1292	26.2778	ACYP1	acylphosphatase 1
ENSG00000170634	8.48385	7.72011	7.22322	9.38486	13.3424	11.0316	6.25063	5.48753	7.47867	11.7024	9.40647	10.8485	6.77941	6.05586	5.1883	10.3502	8.79991	9.54255	ACYP2	acylphosphatase 2
ENSG00000196839	4.21839	4.25588	4.14737	0.835753	0.840914	0.950998	4.11649	4.24809	4.40371	0.830674	0.987702	1.17016	1.57847	2.02243	2.03921	0.977468	0.577783	0.652537	ADA	adenosine deaminase
ENSG00000168803	12.6736	13.2725	14.1209	17.6952	15.5876	15.0284	14.9894	15.2392	10.7127	15.7026	18.5169	16.2445	12.5142	11.2183	11.5489	15.2366	14.7464	13.5643	ADAL	adenosine deaminase like
ENSG00000137845	60.2095	63.3151	65.668	83.5848	79.4593	84.1637	68.3502	65.7884	56.8784	110.926	112.287	86.4519	48.2919	55.2162	60.7589	99.7767	105.75	100.915	ADAM10	ADAM metallopeptidase domain 10
ENSG00000073670	2.14044	1.6859	1.75885	0.331173	0.288106	0.436105	2.0435	2.74441	2.38164	0.551675	0.447381	0.448984	1.73627	1.26443	1.16351	0.332236	0.554618	0.372937	ADAM11	ADAM metallopeptidase domain 11
ENSG00000143537	266.26	240.37	255.911	332.684	355.14	363.686	234.854	250.154	282.33	306.104	325.231	321.129	295.812	284.773	268.442	299.745	332.992	325.461	ADAM15	ADAM metallopeptidase domain 15
ENSG00000151694	9.96354	10.6654	11.0753	10.7589	10.5188	10.0288	11.3021	11.6253	10.9796	12.2673	12.938	10.7464	7.68938	8.69493	9.37633	11.2427	12.3989	11.6731	ADAM17	ADAM metallopeptidase domain 17
ENSG00000135074	0.084756	0.082162	0.246366	0.078188	0.118346	0.061367	0.171731	0.279193	0.159645	0.159573	0.279222	0.163534	0.157146	0.101327	0.094496	0.151176	0.212075	0.179482	ADAM19	ADAM metallopeptidase domain 19
ENSG00000008277	2.21424	2.43373	2.42484	2.79186	3.12913	2.76943	2.50738	2.60905	1.90379	3.92033	2.83268	2.69566	1.956	3.26317	3.09776	3.76971	3.97247	3.26782	ADAM22	ADAM metallopeptidase domain 22
ENSG00000197140	0.853533	0.776074	0.948958	0.508896	0.37093	0.758655	0.994249	0.845881	0.391593	0.632791	0.881225	0.581223	0.992669	0.659663	1.46075	0.895814	1.34342	0.349877	ADAM32	ADAM metallopeptidase domain 32
ENSG00000151651	0.930239	1.01012	0.488414	1.2703	1.66065	1.01731	0.622304	0.728555	0.752884	1.09002	1.26568	0.710576	0.282524	0.256074	0.652181	0.846053	1.14874	1.47257	ADAM8	ADAM metallopeptidase domain 8
ENSG00000168615	113.842	137.961	144.192	353.192	320.527	337.523	112.057	109.98	85.4454	302.844	301.608	262.674	111.941	121.19	123.874	362.718	380.646	343.129	ADAM9	ADAM metallopeptidase domain 9
ENSG00000154734	0.346191	0.217558	0.196285	0.23535	0.314034	0.641941	0.555442	0.118543	0.295295	0.368136	0.234778	0.497899	0.202165	0.064079	0.102132	0.492974	0.307592	1.59547	ADAMTS1	ADAM metallopeptidase with thrombospondin type 1 motif 1
ENSG00000142303	0.233534	0.210574	0.141686	0.067624	0.620302	0.172992	0.632005	0.141089	0.251455	0.272716	0.054262	0.405563	0.129238	0.080436	0.457612	0.295553	0.130064	0.897492	ADAMTS10	ADAM metallopeptidase with thrombospondin type 1 motif 10
ENSG00000160323	3.10767	1.75467	2.14069	5.29195	6.22845	5.34994	1.75934	2.01598	1.81056	3.92396	4.42387	4.15618	1.40478	1.16317	1.53837	3.09606	4.36634	4.38336	ADAMTS13	ADAM metallopeptidase with thrombospondin type 1 motif 13
ENSG00000166106	19.0919	17.8293	19.6573	14.9921	15.3295	14.5824	6.87827	7.20418	7.99273	4.92896	5.07148	4.70945	4.95291	5.439	6.30454	7.74139	8.74442	8.33951	ADAMTS15	ADAM metallopeptidase with thrombospondin type 1 motif 15
ENSG00000140470	0.223117	0.061963	0.142835	0.204222	0.384646	0.420646	0.425726	0.095116	0.169339	0.093646	0.180502	0.152202	0.549554	0.36988	0.226056	0.133358	0.297575	0.078069	ADAMTS17	ADAM metallopeptidase with thrombospondin type 1 motif 17
ENSG00000145808	0.158096	0.276384	0.150216	1.18629	0.891097	0.794979	0.235696	0.274003	0.433306	0.741274	0.580675	0.764219	0.163476	0.287723	0.156771	1.43344	0.970233	0.776796	ADAMTS19	ADAM metallopeptidase with thrombospondin type 1 motif 19
ENSG00000249421	0.863596	0.566746	0.902345	2.34914	1.89666	2.16299	0.942421	0.83315	0.849674	1.83812	2.26297	2.28575	0.761194	1.22559	1.11163	2.54683	2.24654	2.59888	ADAMTS19-AS1	ADAMTS19 antisense RNA 1
ENSG00000173157	0.647376	0.737257	0.704719	0.525736	0.414001	0.391717	0.700668	0.761533	0.344517	0.571801	0.494159	0.450377	0.198154	0.299738	0.386657	0.505603	0.574149	0.513352	ADAMTS20	ADAM metallopeptidase with thrombospondin type 1 motif 20
ENSG00000158859	0.374126	0.92653	0.489713	0.025726	0.029452	0.035933	0.675351	0.358225	0.404432	0.017717	0.043242	0.046846	0.054172	0.067731	0.263816	0.038591	0.02486	0.065477	ADAMTS4	ADAM metallopeptidase with thrombospondin type 1 motif 4
ENSG00000136378	2.51812	2.41109	2.6581	1.11912	1.38414	1.4422	3.91747	3.52796	3.33815	1.70054	2.12693	1.62224	2.26799	2.39525	2.23387	1.54792	1.66753	1.59652	ADAMTS7	ADAM metallopeptidase with thrombospondin type 1 motif 7
ENSG00000274376	0.06057	0.016556	0.048665	0	0.033357	0.236014	1.4327	0.046754	0.210119	0.028522	0.166644	0.027154	0.273477	0.073215	0.72288	0.161536	0	0.025314	ADAMTS7P1	ADAMTS7 pseudogene 1
ENSG00000134917	0.483738	0.565113	0.548534	0.407879	0.510106	0.641452	0.126198	0.109735	0.206446	0.170411	0.373318	0.161782	0.078736	0.073787	0.065095	0.313547	0.188973	0.179611	ADAMTS8	ADAM metallopeptidase with thrombospondin type 1 motif 8
ENSG00000156218	0.650811	0.933129	0.493895	0.850052	0.552963	0.683236	1.13784	1.11284	0.857341	1.08708	0.984523	0.580118	0.281179	0.650485	0.49164	0.542428	0.874358	0.58891	ADAMTSL3	ADAMTS like 3
ENSG00000143382	4.09638	4.34842	3.81611	5.4029	5.84579	5.49379	3.95695	3.97289	3.706	6.35645	7.21176	6.6458	4.52007	4.60946	4.63346	5.19025	5.53717	5.53273	ADAMTSL4	ADAMTS like 4
ENSG00000203804	0.327928	0.205285	0.098811	0.267419	0.678442	0.481211	0.150135	0.090786	0.14788	0.358707	0.447772	0.226844	0.123707	0.043109	0.140686	0.720619	0.275468	0.55186	ADAMTSL4-AS1	ADAMTSL4 antisense RNA 1
ENSG00000185761	11.7845	10.5698	12.8169	37.451	40.7011	45.8558	9.32985	10.5814	12.1207	32.7948	33.9149	30.8553	10.3099	10.5437	11.0185	31.7776	35.9755	31.6792	ADAMTSL5	ADAMTS like 5
ENSG00000105963	38.3807	31.6113	34.8348	34.0811	33.981	39.6596	28.9448	32.6661	42.1407	36.502	31.0672	32.6621	28.4885	34.4437	32.7004	35.4919	36.8987	37.8771	ADAP1	ArfGAP with dual PH domains 1
ENSG00000184060	3.51375	2.7409	3.01675	6.13635	6.9161	4.97167	4.74204	4.01856	3.63964	3.5964	3.89532	3.94467	2.55696	3.03144	3.33106	3.48118	3.37734	4.81592	ADAP2	ArfGAP with dual PH domains 2
ENSG00000160710	83.0683	85.027	96.0968	105.237	101.504	103.701	93.2803	98.9469	96.086	118.282	111.335	102.51	75.3195	86.8713	94.9846	104.461	109.105	104.6	ADAR	adenosine deaminase RNA specific
ENSG00000197381	6.86022	5.86422	7.74865	4.97888	5.34123	4.15753	9.30508	7.85489	7.61617	4.48114	3.72091	3.73294	4.4091	4.63999	4.67333	4.24529	4.46191	3.91445	ADARB1	adenosine deaminase RNA specific B1
ENSG00000185736	0.348667	0.343279	0.58413	0.065335	0.039322	0.019548	0.211517	0.222668	0.300896	0.053081	0.021873	0	0.276616	0.139451	0.389109	0.126461	0.122594	0.04517	ADARB2	adenosine deaminase RNA specific B2 (inactive)
ENSG00000065457	72.5654	77.4247	77.0996	82.65	88.7514	90.6052	81.6425	88.3257	76.5799	104.243	103.728	89.1546	60.7719	68.8657	74.8276	94.9485	100.237	91.9585	ADAT1	adenosine deaminase tRNA specific 1
ENSG00000189007	2.00538	2.25466	2.48694	1.65856	1.39771	2.09812	2.62786	1.87989	1.34385	1.81281	2.18164	1.65833	1.23362	1.1204	1.4096	2.30459	1.73444	1.52427	ADAT2	adenosine deaminase tRNA specific 2
ENSG00000213638	12.6529	10.4561	11.8919	14.2584	14.8802	13.497	10.9998	13.0076	12.5995	13.9734	12.3624	14.1282	10.1531	10.7193	9.79946	8.92467	8.35217	11.8448	ADAT3	adenosine deaminase tRNA specific 3
ENSG00000063761	19.0447	18.347	20.6525	23.4327	25.1866	24.1181	18.0684	19.356	19.4637	24.1801	23.2586	20.8267	17.9585	18.7312	18.4182	24.3761	25.9529	25.4177	ADCK1	aarF domain containing kinase 1
ENSG00000133597	25.2351	27.1356	26.3052	45.3769	47.1829	45.2752	24.8416	26.3544	28.8281	38.8972	39.0606	42.768	29.8315	28.0544	27.3521	39.6926	40.5523	42.8789	ADCK2	aarF domain containing kinase 2
ENSG00000173137	8.16003	8.09232	7.94392	8.35836	10.7324	9.44615	7.0992	6.69703	7.79642	7.26773	8.5914	7.385	6.90495	5.13196	5.22303	6.96967	8.86756	8.97649	ADCK5	aarF domain containing kinase 5
ENSG00000164742	1.53579	1.10247	1.67141	1.27093	1.08753	1.42374	1.17957	1.14003	1.36767	0.641555	0.58401	0.698857	0.935436	0.991329	1.1062	0.620195	0.726678	0.492607	ADCY1	adenylate cyclase 1
ENSG00000143199	0.20233	0.021158	0.105296	1.43429	1.35075	1.57824	0	0.098763	0.023907	0.330122	0.416769	0.221458	0.036938	0	0.005704	0.52552	0.359233	0.590837	ADCY10	adenylate cyclase 10
ENSG00000078295	0.02022	0.086095	0.021148	0.108112	0.324713	0.166958	0.069972	0.038342	0.011432	0.231312	0.063719	0.444436	0.013926	0	0.087454	0.09605	0.386345	0.422245	ADCY2	adenylate cyclase 2
ENSG00000138031	12.1258	12.8917	13.0371	2.67633	3.04713	4.10488	12.6855	11.7567	14.0945	2.64266	4.42329	3.43381	8.61953	8.37037	8.31557	2.29604	3.0768	2.86354	ADCY3	adenylate cyclase 3
ENSG00000129467	0.185609	0.147679	0.136052	0.186947	0.169334	0.306213	0.050239	0.115923	0.440857	0.16078	0.261631	0.069629	0.01647	0.015777	0.036968	0.069955	0.212812	0.217177	ADCY4	adenylate cyclase 4
ENSG00000174233	59.4816	59.8083	65.693	84.6181	88.6348	89.3982	54.7723	55.9839	57.597	74.8788	86.501	67.6312	47.8029	51.358	59.0282	89.6478	96.4717	90.5542	ADCY6	adenylate cyclase 6
ENSG00000257660	4.35724	2.4006	3.24504	4.76628	3.3365	5.13814	2.80674	2.10487	2.76949	5.27555	4.6589	3.99885	4.401	3.81096	3.33428	4.80598	4.93711	4.71934	ADCY6-DT	ADCY6 divergent transcript
ENSG00000121281	0.268596	0.238257	0.11693	0.026452	0.069503	0.13745	0.079968	0.126903	0.228425	0.041435	0.122083	0.087242	0.040613	0.038317	0.069636	0.048528	0.14642	0.120478	ADCY7	adenylate cyclase 7
ENSG00000162104	16.7698	17.1618	19.9725	15.232	16.1922	15.8963	14.9849	15.4047	14.4	14.3201	13.9241	10.5828	9.73675	13.2805	15.754	14.5671	16.785	14.2629	ADCY9	adenylate cyclase 9
ENSG00000087274	80.255	80.317	87.8475	92.9355	96.585	102.151	83.7495	79.6803	81.8406	97.1114	96.9312	82.4367	72.2267	83.1586	86.8892	100.974	109.204	96.9899	ADD1	adducin 1
ENSG00000148700	11.5923	13.6475	12.7329	33.6311	30.1143	34.4779	11.2893	11.1517	9.24388	31.3017	29.1801	26.4964	11.3447	11.991	13.1426	38.5173	42.3726	37.4925	ADD3	adducin 3
ENSG00000118492	0.170045	0.524896	0.936327	0.943236	0.247622	0.899283	0.297628	0.199684	0.416961	0.661057	0.268236	0.156781	0.014189	0.06833	0.645609	0.039715	0.042947	0.097331	ADGB	androglobin
ENSG00000020181	0.316932	0.244884	0.325323	0.472146	0.548747	0.318468	0.342146	0.436065	0.501625	0.724585	0.671741	0.72597	0.34249	0.440001	0.508786	0.484599	0.577804	0.679047	ADGRA2	adhesion G protein-coupled receptor A2
ENSG00000152990	11.4275	11.4449	12.5671	5.76832	6.29495	6.30553	12.5273	12.6332	10.5607	6.29167	6.89858	5.79153	8.25142	9.53586	9.93412	6.52911	7.29753	6.30587	ADGRA3	adhesion G protein-coupled receptor A3
ENSG00000181790	0.233065	0.302159	0.205105	0.582566	0.420899	0.148891	0.137562	0.218574	0.083844	0.119771	0.165741	0.171973	0.059397	0.075477	0.050296	0.083456	0.250477	0.062851	ADGRB1	adhesion G protein-coupled receptor B1
ENSG00000121753	18.2136	15.8501	19.1985	17.3318	17.2657	16.726	11.5025	12.0174	13.0935	8.63611	10.1339	10.4671	17.5605	16.2603	17.3592	11.9516	12.0089	12.5745	ADGRB2	adhesion G protein-coupled receptor B2
ENSG00000127507	0.551604	0.588452	1.01363	0.551086	0.455585	0.422231	0.44451	0.338936	0.579576	0.431652	0.355127	0.484899	0.504474	0.135324	0.395306	0.082099	0.77617	0.312491	ADGRE2	adhesion G protein-coupled receptor E2
ENSG00000123146	19.0988	17.8462	16.7467	17.2295	20.3894	16.5887	13.1875	15.4943	16.5172	17.1615	19.6669	16.9112	14.6623	15.7142	15.4501	19.0677	18.3474	16.9797	ADGRE5	adhesion G protein-coupled receptor E5
ENSG00000153292	1.44215	1.46453	1.11271	6.12444	7.75635	7.89199	2.10979	1.45338	1.42129	11.3319	10.9948	9.32841	1.43362	1.28974	1.09061	9.69862	9.19919	7.73502	ADGRF1	adhesion G protein-coupled receptor F1
ENSG00000173567	0.017641	0.045569	0.032493	0.01923	0.295999	0.238175	0.028829	0.283546	0.009728	0.429009	0	0.012604	0	0.26625	0.280289	0.038472	0.012469	0.095205	ADGRF3	adhesion G protein-coupled receptor F3
ENSG00000205336	90.2549	89.9998	100.457	132.139	144.557	153.891	95.9575	97.879	104.689	142.669	142.913	116.667	83.8561	97.5961	105.577	127.852	141.59	138.495	ADGRG1	adhesion G protein-coupled receptor G1
ENSG00000182885	0.658189	0.662016	0.747823	0.936429	0.913447	0.944074	0.330114	0.554175	0.417762	1.26401	1.03145	1.06917	0.170014	0.189139	0.233473	0.196518	0.183297	0.169772	ADGRG3	adhesion G protein-coupled receptor G3
ENSG00000112414	20.2633	22.9027	24.893	36.558	34.6598	35.1379	22.9036	21.2609	15.3797	38.3738	34.6727	28.4731	16.7622	21.1139	22.8815	41.1504	43.8666	39.9471	ADGRG6	adhesion G protein-coupled receptor G6
ENSG00000072071	21.7554	20.0266	22.8525	18.4642	19.3399	20.1049	22.3728	24.2886	30.67	20.5406	21.418	18.8463	15.2712	19.92	20.9704	17.4346	20.3046	18.1185	ADGRL1	adhesion G protein-coupled receptor L1
ENSG00000117114	0.151786	0.142824	0.265588	0.341947	0.350133	0.411411	0.415722	0.334119	0.266119	0.675745	0.648896	0.414177	0.232172	0.231391	0.185763	0.411757	0.424929	1.22824	ADGRL2	adhesion G protein-coupled receptor L2
ENSG00000150471	0.223631	0.290887	0.244828	0.07872	0.17151	0.086432	0.108958	0.190965	0.101565	0.071	0.075592	0.060245	0.045334	0.051025	0.037393	0.079886	0.057823	0.380056	ADGRL3	adhesion G protein-coupled receptor L3
ENSG00000164199	9.39554	8.94338	10.6917	7.70731	7.33451	6.90262	9.85942	9.82578	8.94469	7.38442	8.82003	8.0091	8.49571	7.4174	7.20119	6.54868	5.6974	5.74616	ADGRV1	adhesion G protein-coupled receptor V1
ENSG00000248144	0.07021	0.0267	0.100081	0.212804	0.349606	0.208513	0	0.155655	0.133635	0.908099	1.25164	0.979787	0.115492	0.172918	0.043783	0.329101	0.310734	0.290865	ADH1C	alcohol dehydrogenase 1C (class I), gamma polypeptide
ENSG00000197894	121.454	143.916	133.724	134.265	136.403	131.227	130.924	136.422	134.873	141.714	136.774	148.233	126.982	128.989	120.278	151.584	158.644	145.503	ADH5	alcohol dehydrogenase 5 (class III), chi polypeptide
ENSG00000147576	4.07349	3.9094	3.55002	12.8224	13.6976	13.5161	4.20565	2.16669	2.91106	9.32239	10.798	10.1612	2.86783	2.56615	3.32133	12.4355	11.7445	11.0081	ADHFE1	alcohol dehydrogenase iron containing 1
ENSG00000182551	72.6906	74.4334	75.3059	85.5709	90.222	85.0008	72.4285	77.6405	92.0815	82.5771	81.4523	89.5391	90.5571	89.6305	84.0217	91.3855	87.5643	93.441	ADI1	acireductone dioxygenase 1
ENSG00000181092	0.711121	0.575321	0.571231	0.862965	0.700474	0.911033	0.967509	0.967701	0.837444	1.27965	1.47967	1.24112	0.673394	0.672794	0.609414	0.692779	1.04112	0.889889	ADIPOQ	adiponectin, C1Q and collagen domain containing
ENSG00000159346	127.486	127.956	132.589	162.285	172.174	165.169	130.991	133.038	136.161	163.675	155.903	154.313	117.961	125.366	131.751	156.946	160.113	162.141	ADIPOR1	adiponectin receptor 1
ENSG00000006831	46.402	48.6006	53.0489	56.8964	59.1479	59.6026	52.5502	52.9669	47.4302	61.286	62.5112	56.422	43.7406	47.996	52.0144	59.3938	63.5726	58.7283	ADIPOR2	adiponectin receptor 2
ENSG00000148671	565.65	505.481	509.093	658.106	723.326	738.585	420.364	400.133	546.453	497.919	540.752	607.769	516.068	514.004	437.191	519.418	521.009	539.615	ADIRF	adipogenesis regulatory factor
ENSG00000156110	154.023	179.716	182.39	252.315	233.505	236.189	170.777	174.068	149.941	247.2	252.992	233.653	208.305	202.449	180.287	275.074	278.566	265.384	ADK	adenosine kinase
ENSG00000148926	16.2481	15.8769	18.0596	23.6376	25.5984	24.1802	18.6093	19.0195	21.2413	28.6684	25.8415	29.303	23.3936	21.8355	19.6362	21.8807	25.4082	22.7097	ADM	adrenomedullin
ENSG00000128165	4.69584	4.70337	5.47995	4.65998	4.95228	4.67295	3.86828	4.14629	4.38865	4.89727	4.16831	4.15202	4.47327	4.77451	4.97251	5.93954	5.43515	5.63374	ADM2	adrenomedullin 2
ENSG00000224420	2.18291	1.66109	1.4475	1.19644	1.01634	1.25163	2.15796	1.94399	2.23163	1.02436	1.39409	1.36505	1.56753	1.2434	1.46061	1.46288	1.31266	0.987902	ADM5	adrenomedullin 5 (putative)
ENSG00000101126	47.6673	54.3897	57.6313	51.1052	46.9666	50.8101	53.3715	54.0991	43.0844	49.7121	51.3997	42.1598	44.5645	48.3908	53.6198	52.0951	49.9864	46.1302	ADNP	activity dependent neuroprotector homeobox
ENSG00000259456	1.69001	1.10553	1.48834	2.24861	1.63538	1.87374	1.29381	1.0458	1.82474	1.49234	1.97084	1.72739	1.43091	1.46524	1.49167	2.12475	1.63353	1.25855	ADNP-AS1	ADNP antisense RNA 1
ENSG00000101544	13.026	15.2765	15.6807	14.0642	13.8759	14.1938	14.1892	14.504	13.2353	13.7644	13.1197	11.9579	12.6202	14.1493	15.1061	13.0158	16.1337	14.1042	ADNP2	ADNP homeobox 2
ENSG00000181915	15.9529	17.2484	18.2563	18.1806	17.7866	19.6288	17.7387	18.3666	18.2249	20.0435	19.3928	20.577	16.5747	17.6032	17.3763	18.4145	18.6521	19.2407	ADO	2-aminoethanethiol dioxygenase
ENSG00000163485	1.88494	1.86755	2.13956	0.515837	0.514992	0.472702	1.89504	1.7789	1.77222	0.458901	0.512725	0.467062	1.42115	1.1673	1.20971	0.389315	0.437963	0.460855	ADORA1	adenosine A1 receptor
ENSG00000128271	1.47218	1.40488	1.50551	0.615511	0.362117	0.163852	1.73385	1.14848	2.07419	1.4489	1.5308	1.86972	2.0441	1.95978	1.72809	2.09804	2.09583	1.12891	ADORA2A	adenosine A2a receptor
ENSG00000159322	30.8275	39.0271	32.8542	33.8607	34.8951	37.5881	35.1016	32.0471	29.0283	30.2786	32.3969	29.6831	23.7955	23.8941	24.1988	38.6501	35.7257	33.054	ADPGK	ADP dependent glucokinase
ENSG00000144843	3.75988	4.00357	4.36861	6.32815	5.75664	6.37759	2.99963	2.67994	3.40958	6.14097	6.06887	5.49191	2.05122	2.19607	2.64943	5.57493	4.78509	4.62091	ADPRH	ADP-ribosylarginine hydrolase
ENSG00000153531	25.3978	22.3328	26.0605	24.9522	30.2736	29.85	22.5962	22.4768	25.386	26.3607	27.0428	26.0331	24.2525	22.6953	24.1545	24.6797	28.461	28.265	ADPRHL1	ADP-ribosylhydrolase like 1
ENSG00000116863	29.7939	29.806	30.3481	27.9139	29.1489	30.2343	32.7291	35.9078	37.2824	28.2805	31.1366	31.9323	32.9463	29.6642	28.1776	25.4303	29.0762	29.3327	ADPRHL2	ADP-ribosylhydrolase like 2
ENSG00000170222	4.08965	4.50051	4.68765	5.62531	5.79106	5.8503	6.02257	5.59092	4.80366	6.35007	5.66624	6.52921	5.68503	4.97321	4.60431	5.80413	4.88088	6.00336	ADPRM	ADP-ribose/CDP-alcohol diphosphatase, manganese dependent
ENSG00000170214	0.25239	0.174928	0.165136	1.83438	1.80874	2.08986	0.12887	0.097289	0.205881	0.614931	0.64931	0.562814	0.344451	0.262553	0.280601	0.671991	0.503858	0.563837	ADRA1B	adrenoceptor alpha 1B
ENSG00000150594	3.27677	3.34756	3.87638	0.118844	0.130861	0.184673	1.17097	1.05796	1.31008	0.135689	0.103617	0.035303	1.499	1.39323	1.80445	0.051676	0.082478	0.106958	ADRA2A	adrenoceptor alpha 2A
ENSG00000184160	8.11666	9.31926	9.59654	9.57187	9.2575	10.0076	7.54895	7.80534	9.11152	6.73212	5.13638	6.37947	10.4814	9.95626	9.81417	7.66515	8.98964	8.60188	ADRA2C	adrenoceptor alpha 2C
ENSG00000043591	0.412146	0.259147	0.372885	0.109326	0.041241	0.065186	0.487336	0.371428	0.272857	0.185701	0.170739	0.18378	0.130068	0.186518	0.150088	0.161364	0.095723	0.104123	ADRB1	adrenoceptor beta 1
ENSG00000130706	151.674	141.055	141.506	115.589	122.208	123.176	156.598	162.61	194.865	125.957	134.889	142.207	128.106	125.787	116.897	105.992	112.206	107.816	ADRM1	adhesion regulating molecule 1
ENSG00000239900	80.638	85.0053	80.2286	52.79	51.3038	54.9377	94.8666	92.555	93.322	59.5037	60.1886	61.5785	79.8606	73.4662	72.7829	56.2422	56.4224	54.8874	ADSL	adenylosuccinate lyase
ENSG00000185100	8.22263	7.79134	9.67548	5.70971	5.73369	6.63587	8.38884	7.50807	8.86701	5.66058	6.19397	5.90057	8.41129	8.36181	8.43739	5.35836	5.54252	5.49449	ADSS1	adenylosuccinate synthase 1
ENSG00000035687	44.9268	47.4568	48.4503	55.5196	56.9785	54.5663	52.4434	52.909	44.0041	63.0017	60.2895	64.8971	47.4517	49.8616	50.777	59.1853	60.7181	61.1779	ADSS2	adenylosuccinate synthase 2
ENSG00000106624	0.355354	0.02965	0.513022	0.033475	0.051342	0.095646	0.047914	0.047306	0.072065	0.020717	0.008905	0.101974	0.015083	0	0.075321	0	0	9.28006	AEBP1	AE binding protein 1
ENSG00000139154	18.8782	20.0702	20.1295	26.7026	25.261	25.1269	22.3691	19.939	15.0423	27.3874	28.1354	22.6641	17.7646	16.7926	17.8548	27.397	24.4629	27.0797	AEBP2	AE binding protein 2
ENSG00000181026	15.1792	15.3189	16.1045	4.56443	5.51669	5.90412	15.334	15.2943	16.4586	6.07153	5.76829	5.70199	9.63122	9.44519	9.59786	4.65149	5.31183	5.31094	AEN	apoptosis enhancing nuclease
ENSG00000196526	2.47242	2.50951	2.84236	3.77397	3.75873	3.74849	2.24542	2.16728	2.36392	3.16974	2.79836	2.53406	1.90788	2.46477	2.94149	3.27623	4.00353	3.16499	AFAP1	actin filament associated protein 1
ENSG00000157510	0.833511	0.443394	0.637413	0.025568	0.060822	0.132934	0.414328	0.14113	0.228555	0.133205	0.174626	0.109446	0.277129	0.259551	0.460049	0.026878	0.046753	0.053778	AFAP1L1	actin filament associated protein 1 like 1
ENSG00000169129	0.131895	0.088598	0.193977	0.446676	0.34519	0.436431	0.22706	0.102245	0.175544	0.485565	0.640936	0.529845	0.193953	0.154561	0.107723	0.961221	0.559836	0.443364	AFAP1L2	actin filament associated protein 1 like 2
ENSG00000130396	9.66367	7.81799	6.43715	14.3805	14.6982	15.1679	8.49173	7.43309	6.43454	13.8135	14.5367	10.5082	5.09835	4.07763	7.94687	15.3204	16.816	15.5083	AFDN	afadin, adherens junction formation factor
ENSG00000198221	0.57204	0.489372	0.976254	0.402234	0.709995	0.450636	0.175629	0.182139	0.235536	0.556285	0.282371	0.274624	0.243775	0.310455	0.331451	0.431508	0.227733	0.697947	AFDN-DT	AFDN divergent transcript
ENSG00000172493	6.19003	7.10612	8.04482	8.87079	7.08966	7.89856	6.80731	6.34476	4.94693	8.09454	8.00772	5.28186	3.48332	4.66943	5.91754	8.36272	7.76085	7.52452	AFF1	AF4/FMR2 family member 1
ENSG00000144218	22.1793	23.2557	23.6492	9.25305	10.3021	9.96111	17.2828	15.57	16.6931	7.45828	7.02582	6.30215	14.5135	17.0696	20.5478	10.6206	11.1562	10.5847	AFF3	AF4/FMR2 family member 3
ENSG00000072364	21.5862	24.0157	26.2437	36.5484	34.8074	36.1876	25.7056	25.661	20.8072	43.021	41.0055	29.0475	16.7334	20.4991	25.1005	45.0551	43.7381	40.1364	AFF4	AF4/FMR2 family member 4
ENSG00000135537	4.38722	3.53557	4.26116	5.23631	4.09553	4.27851	3.22244	3.84197	4.5788	5.77226	4.53137	3.98257	5.26082	3.8014	4.12098	4.80501	5.97339	4.49653	AFG1L	AFG1 like ATPase
ENSG00000223959	20.4217	17.3265	19.3938	17.2782	17.1013	16.4951	18.0342	13.9855	12.0148	13.9928	15.3104	14.1141	11.0673	11.1737	14.6165	18.3173	19.44	15.623	AFG3L1P	AFG3 like matrix AAA peptidase subunit 1, pseudogene
ENSG00000141385	36.538	35.1364	44.1088	33.296	32.9732	32.2109	40.4921	40.0061	36.3501	34.7796	32.2478	31.4388	33.6065	37.7856	40.0636	34.7092	36.0244	33.1618	AFG3L2	AFG3 like matrix AAA peptidase subunit 2
ENSG00000183077	37.2435	37.0726	39.9146	37.9849	39.9079	36.7345	33.887	32.2489	32.1084	31.7677	31.7023	35.3857	32.7796	28.4872	33.4278	35.2185	34.5206	35.8589	AFMID	arylformamidase
ENSG00000119844	19.5506	23.5181	24.2388	41.135	35.7806	36.3107	25.0223	23.3433	19.4419	39.198	34.9415	35.158	23.7334	22.6026	24.3746	40.0339	40.3957	39.2923	AFTPH	aftiphilin
ENSG00000038002	30.3594	31.5293	28.2067	41.0933	43.5182	39.7762	34.9395	32.3411	27.3294	39.1773	39.3653	38.5662	36.6514	38.9856	34.3107	39.9752	39.7584	39.367	AGA	aspartylglucosaminidase
ENSG00000157985	22.8616	21.3478	25.594	29.7155	28.8274	36.5803	24.4624	22.8392	20.6141	30.464	34.5335	29.6698	20.0947	21.4382	24.0306	30.4084	37.4247	34.8807	AGAP1	ArfGAP with GTPase domain, ankyrin repeat and PH domain 1
ENSG00000235529	0.39935	0.070333	0	0.126146	0.301657	0.120694	0.436217	0.112535	0.528611	0.248748	0.407181	0.079185	0.300981	0.049851	0.345826	0.163938	0.183667	0.208794	AGAP1-IT1	AGAP1 intronic transcript 1
ENSG00000271880	0.774216	0.493818	0.414787	1.60512	1.53586	1.54541	0.848502	0.855522	0.124412	1.29542	1.18082	0.94772	0.289481	0.317774	0.504598	0.952993	0.754233	1.11758	AGAP11	ArfGAP with GTPase domain, ankyrin repeat and PH domain 11
ENSG00000265018	0.534333	0.29737	0.683888	0.524961	0.643731	0.517115	0.383419	0.566527	0.086172	0.21125	0.279656	0.163116	0.222105	0.194565	0.459969	0.628435	0.487744	0.251419	AGAP12P	ArfGAP with GTPase domain, ankyrin repeat and PH domain 12, pseudogene
ENSG00000135439	1.12528	0.870143	1.76745	0.586885	0.774259	1.12472	1.92034	2.27694	2.33505	2.64703	1.68191	1.2023	0.976906	0.860987	1.14748	0.671236	0.897519	0.718432	AGAP2	ArfGAP with GTPase domain, ankyrin repeat and PH domain 2
ENSG00000255737	7.63943	8.10612	7.85437	5.27479	4.82817	5.73155	8.84266	8.8925	10.1482	5.4283	5.86001	6.13199	7.27417	7.07801	6.52497	5.4059	5.50007	6.17655	AGAP2-AS1	AGAP2 antisense RNA 1
ENSG00000133612	30.6638	27.1258	29.2124	30.0376	34.0091	33.655	27.531	26.1852	33.0194	31.3426	36.987	32.301	25.4548	23.5105	24.2133	29.681	31.8642	33.8427	AGAP3	ArfGAP with GTPase domain, ankyrin repeat and PH domain 3
ENSG00000188234	8.70873	8.38941	5.22847	8.97163	6.73746	7.21615	9.26278	4.04739	4.7048	8.20949	9.36114	5.38293	3.25858	2.33183	5.29619	9.37454	8.6662	8.06676	AGAP4	ArfGAP with GTPase domain, ankyrin repeat and PH domain 4
ENSG00000172650	2.45867	1.87563	1.77285	4.1393	2.77578	3.25797	1.95409	2.73775	1.12051	3.08692	3.70343	2.82669	1.54738	1.17778	1.62156	4.28942	2.68949	3.56485	AGAP5	ArfGAP with GTPase domain, ankyrin repeat and PH domain 5
ENSG00000204149	3.91399	2.73098	3.58591	5.6648	5.064	4.3673	3.88767	4.00157	2.35479	5.4405	5.40864	4.49089	2.30688	1.21122	1.95125	4.7645	4.8825	4.5533	AGAP6	ArfGAP with GTPase domain, ankyrin repeat and PH domain 6
ENSG00000204172	5.31416	4.45382	4.20866	6.81274	6.15334	6.34043	5.2909	4.7055	3.75102	5.94817	6.32517	4.88667	2.75454	1.91705	2.88316	6.91325	6.43938	5.97237	AGAP9	ArfGAP with GTPase domain, ankyrin repeat and PH domain 9
ENSG00000165923	4.80986	3.63371	4.03909	4.6155	4.2976	7.02681	3.10418	2.82037	2.03679	3.96642	5.62751	5.01867	1.60666	1.53527	2.00704	3.138	3.11764	3.52427	AGBL2	ATP/GTP binding protein like 2
ENSG00000146856	1.00672	1.34892	0.4396	1.52243	0.860743	1.92689	1.44704	0.947739	0.459422	1.32705	1.98479	1.26202	0.823997	0.468749	0.475188	1.02253	1.51321	1.98173	AGBL3	ATP/GTP binding protein like 3
ENSG00000186094	0.276975	0.382021	0.146365	0.373825	0.336837	0.42115	0.522236	0.357089	0.549012	0.791192	0.476033	0.510062	0.685209	0.195517	0.297669	0.1764	0.396035	0.660753	AGBL4	ATP/GTP binding protein like 4
ENSG00000084693	25.3145	24.771	24.861	20.5569	22.4113	23.3994	24.393	24.3634	26.367	20.3919	20.2213	20.4013	24.0089	24.6174	24.4195	19.7388	20.8533	20.0402	AGBL5	ATP/GTP binding protein like 5
ENSG00000204305	2.54994	1.79922	1.77441	1.82406	1.85671	1.95973	2.44707	1.78943	2.05586	2.2496	1.63284	2.10347	1.32147	1.10487	1.08089	1.29443	1.52141	2.14593	AGER	advanced glycosylation end-product specific receptor
ENSG00000173744	25.0319	29.2196	26.8268	31.4464	27.0251	27.872	31.3762	28.3017	19.2573	33.3673	32.4829	27.8495	24.86	27.9646	28.5043	32.375	29.4228	32.7283	AGFG1	ArfGAP with FG repeats 1
ENSG00000106351	7.59424	8.00268	8.6038	6.89293	11.0143	9.70127	8.0237	4.63173	9.6088	9.03646	10.2105	8.40131	6.99197	6.89192	9.22261	10.5932	10.9038	11.4337	AGFG2	ArfGAP with FG repeats 2
ENSG00000164252	28.24	30.1972	32.7059	30.0347	29.9052	30.9485	33.1442	31.1207	30.0215	30.0563	30.4328	29.9524	27.6813	28.5261	29.527	29.9918	28.9632	28.2414	AGGF1	angiogenic factor with G-patch and FHA domains 1
ENSG00000006530	17.7271	19.4534	19.7542	20.4297	20.0786	19.7112	21.64	19.2898	16.2578	23.2926	21.0053	17.5994	13.819	14.652	15.8836	19.3424	21.0969	18.1704	AGK	acylglycerol kinase
ENSG00000162688	10.6932	12.7696	13.633	11.7997	11.1472	11.2431	12.6493	12.1832	8.18492	12.4369	12.5514	9.97551	9.91791	11.0089	12.0944	12.5832	12.6649	11.7893	AGL	amylo-alpha-1, 6-glucosidase, 4-alpha-glucanotransferase
ENSG00000116771	1.92529	2.22127	2.12726	0.98997	0.967823	1.09614	2.55422	2.79457	2.67338	1.54334	1.45223	1.23111	1.93481	1.98032	2.24563	1.15926	1.07218	1.2927	AGMAT	agmatinase
ENSG00000187546	0.261471	0.175055	0.191009	0.291102	0.431424	0.226754	0.667858	0.520389	0.486142	0.223095	0.263168	0.581343	0.20253	0.048107	0.131555	0.19708	0.12198	0.169366	AGMO	alkylglycerol monooxygenase
ENSG00000092847	5.86776	5.69031	6.02402	5.65471	5.93767	5.76146	6.45663	6.26848	5.93781	7.0895	6.40097	4.4819	4.2416	5.88265	7.59006	5.77358	7.14997	6.54626	AGO1	argonaute RISC component 1
ENSG00000123908	22.3724	20.9312	22.1019	13.6933	13.6492	15.9015	19.9636	17.1671	18.915	18.0969	14.5447	10.3396	10.0981	13.5836	19.9887	14.1782	15.6479	15.0395	AGO2	argonaute RISC catalytic component 2
ENSG00000126070	6.80236	8.69066	7.29838	5.57085	6.0393	6.09595	8.09447	9.80024	8.35254	7.53703	7.53493	6.09638	5.8571	6.23151	7.89998	6.17591	5.1475	7.06473	AGO3	argonaute RISC catalytic component 3
ENSG00000134698	2.46206	2.7331	3.61855	2.75149	3.7097	4.06792	3.81133	2.59772	2.52827	3.15686	4.46547	3.51845	3.34554	3.73843	3.33879	3.44451	4.11103	2.84616	AGO4	argonaute RISC component 4
ENSG00000204310	55.1913	53.1615	57.8468	58.6574	59.3325	61.6158	54.0139	55.7456	61.2065	60.3339	61.6904	60.2163	56.1162	57.3235	57.5469	49.673	54.2686	54.9872	AGPAT1	1-acylglycerol-3-phosphate O-acyltransferase 1
ENSG00000169692	48.6653	46.2624	49.6461	49.8612	51.0548	51.0173	42.3258	44.316	50.642	45.2437	46.4518	52.1516	46.0625	41.1253	39.1968	43.3	42.0586	42.3886	AGPAT2	1-acylglycerol-3-phosphate O-acyltransferase 2
ENSG00000160216	35.8903	34.5658	37.717	33.5063	36.9576	35.8568	38.3692	37.8999	41.4603	42.0943	39.6235	34.0477	30.2744	37.9209	35.9608	36.1148	40.5753	37.5319	AGPAT3	1-acylglycerol-3-phosphate O-acyltransferase 3
ENSG00000026652	0.647543	0.622065	0.32041	1.6162	1.23776	0.921642	0.515386	0.264438	0.356641	1.65327	0.826604	1.16692	0.156589	0.156023	0.315707	0.645253	1.01883	0.956104	AGPAT4	1-acylglycerol-3-phosphate O-acyltransferase 4
ENSG00000155189	18.7043	20.5934	21.828	10.7614	11.4554	10.2819	22.358	22.5326	19.7199	12.7969	12.4984	12.0356	15.8908	17.5831	17.3144	12.2877	11.4636	10.8929	AGPAT5	1-acylglycerol-3-phosphate O-acyltransferase 5
ENSG00000106541	1848.14	1896.48	1960.11	1183.58	1149.31	1114.29	1933.38	1879.73	2485.45	1076.75	1097.4	1059.01	1671.17	1731.3	1714.17	1230.1	1100.05	1247.66	AGR2	anterior gradient 2, protein disulphide isomerase family member
ENSG00000173467	144.525	195.905	182.943	137.402	110.866	125.889	164.601	153.206	100.288	95.1043	93.2887	95.5928	110.319	101.691	106.185	99.0791	96.1675	94.992	AGR3	anterior gradient 3, protein disulphide isomerase family member
ENSG00000188157	159.091	139.555	155.419	177.071	188.098	195.702	141.772	148.67	157.759	179.877	191.043	180.25	156.939	164.404	167.281	179.325	202.177	185.667	AGRN	agrin
ENSG00000135049	2.72464	3.712	2.79976	3.04839	2.9006	2.42495	3.50957	3.17183	2.26751	2.82682	3.46213	3.48937	3.08606	2.94747	3.63484	3.58548	3.51575	3.15884	AGTPBP1	ATP/GTP binding protein 1
ENSG00000177674	65.0652	66.0203	68.1198	53.2958	57.3609	58.2145	60.5811	64.0799	74.3665	49.7556	48.9045	48.6305	56.8907	58.3583	55.28	49.3356	56.3441	52.0461	AGTRAP	angiotensin II receptor associated protein
ENSG00000113492	2.03249	2.24541	2.83395	5.72375	6.44295	6.60572	3.47758	3.31205	2.83311	6.05838	6.64114	6.08597	2.82721	3.64554	4.54086	6.85802	7.17408	5.81576	AGXT2	alanine--glyoxylate aminotransferase 2
ENSG00000153207	19.8521	22.6436	23.1111	17.2927	16.4541	15.9021	23.0396	21.8131	17.0171	18.276	17.5954	16.601	14.365	17.9163	18.2561	17.6343	17.6853	16.4964	AHCTF1	AT-hook containing transcription factor 1
ENSG00000101444	392.646	404.574	392.648	211.345	229.711	234.044	370.121	386.733	409.608	218.49	232.377	222.389	376.1	378.444	376.103	210.736	226.5	213.642	AHCY	adenosylhomocysteinase
ENSG00000168710	59.8917	67.4618	71.9328	60.8355	57.7404	59.2648	65.4577	63.198	55.6473	61.7755	58.9796	50.9663	54.4055	57.9921	60.1905	58.3721	61.7933	60.3757	AHCYL1	adenosylhomocysteinase like 1
ENSG00000158467	5.15024	5.74518	6.00572	11.6843	10.1345	11.3633	5.86514	5.10462	5.52018	10.18	10.0561	9.09203	4.58709	5.69722	6.29009	10.8153	12.2812	10.3467	AHCYL2	adenosylhomocysteinase like 2
ENSG00000126705	9.57678	7.51957	7.2391	8.72019	6.70798	9.56071	8.78995	7.64458	8.39875	8.41475	7.03207	7.53413	4.98701	6.17519	8.5396	7.96126	8.48312	8.45316	AHDC1	AT-hook DNA binding motif containing 1
ENSG00000135541	6.06238	5.23108	6.75324	6.057	6.26406	7.63204	5.70905	6.56764	3.59013	6.50924	7.74116	6.24482	4.69697	4.24633	5.02224	6.6901	5.59386	4.86639	AHI1	Abelson helper integration site 1
ENSG00000124942	152.031	147.758	166.557	189.455	177.758	192.191	157.631	148.34	134.539	241.674	217.439	156.726	127.335	166.792	224.477	253.578	277.875	252.496	AHNAK	AHNAK nucleoprotein
ENSG00000185567	7.46948	7.2505	8.21019	4.68162	4.38516	4.37456	7.1162	7.06329	6.67819	5.24012	5.16474	4.82304	7.75318	7.92506	9.00127	7.28449	6.37416	6.51336	AHNAK2	AHNAK nucleoprotein 2
ENSG00000106546	7.07609	7.54546	8.22173	24.063	22.8153	21.7065	7.76407	8.85935	6.36533	30.12	26.3724	22.8804	7.52511	8.34893	12.6579	40.3041	45.546	41.9446	AHR	aryl hydrocarbon receptor
ENSG00000286169	0.61223	0.673915	2.06179	1.33128	1.72038	1.83889	1.6463	1.42315	1.33086	2.86626	3.1935	2.17008	0.743652	0.868647	1.51198	2.36788	2.20922	2.03165	AHRR	aryl-hydrocarbon receptor repressor
ENSG00000100591	281.943	307.031	340.359	288.176	243.725	259.231	359.949	385.149	328.441	295.674	310.008	291.03	292.379	296.315	283.63	239.066	247.261	268.686	AHSA1	activator of HSP90 ATPase activity 1
ENSG00000173209	14.1982	11.2654	8.94457	15.7729	15.472	15.97	13.518	9.72212	7.2492	9.77816	14.6197	13.0633	4.76586	3.65966	6.25546	15.5615	13.5622	13.3568	AHSA2P	activator of HSP90 ATPase homolog 2, pseudogene
ENSG00000186063	39.9874	41.4241	43.7459	28.7483	27.4284	28.0595	39.6031	41.0205	37.2307	32.2964	30.2477	28.2517	37.2977	39.6286	40.5955	32.5098	31.4951	33.1503	AIDA	axin interactor, dorsalization associated
ENSG00000126878	39.882	41.1217	43.6852	21.37	21.5839	23.4399	40.5402	44.7903	42.1248	19.504	20.2233	19.403	29.3042	32.9447	33.3645	17.0606	16.6871	16.2535	AIF1L	allograft inflammatory factor 1 like
ENSG00000156709	42.076	42.0498	47.695	36.7582	34.9836	35.4225	40.2605	41.1714	38.4757	32.0575	33.1368	32.2783	37.1465	38.7336	35.1932	33.3875	35.6778	36.9324	AIFM1	apoptosis inducing factor mitochondria associated 1
ENSG00000042286	0.342235	0.496388	0.655982	1.65262	1.77074	1.70792	0.35921	0.332139	0.412871	1.3971	1.81637	1.99976	0.849931	0.552464	0.710155	1.99897	2.06613	1.71652	AIFM2	apoptosis inducing factor mitochondria associated 2
ENSG00000183773	6.56645	4.53553	5.90135	7.84682	9.50763	9.00115	6.94251	5.14154	5.42081	9.317	11.443	10.5006	4.57414	3.8093	3.52776	7.96852	6.73872	10.7752	AIFM3	apoptosis inducing factor mitochondria associated 3
ENSG00000146416	28.1156	27.8883	25.0652	23.4356	27.3604	27.9607	24.6334	26.6834	24.558	28.5447	24.2276	26.273	25.6062	21.6923	24.593	24.5237	23.785	25.5753	AIG1	androgen induced 1
ENSG00000164022	60.393	61.9556	60.4218	58.4797	55.2454	55.5773	63.1546	58.7803	47.7141	55.0489	56.8836	52.1588	54.4412	53.5738	53.9192	51.8206	50.9255	51.9943	AIMP1	aminoacyl tRNA synthetase complex interacting multifunctional protein 1
ENSG00000106305	85.0672	89.9713	91.1885	57.6024	58.3528	61.3532	86.986	87.8765	86.7181	60.936	63.686	64.9388	81.8939	79.5371	76.8581	56.2492	57.1629	56.8596	AIMP2	aminoacyl tRNA synthetase complex interacting multifunctional protein 2
ENSG00000110711	61.0479	58.8545	60.3149	80.2931	83.7711	81.9716	64.9789	61.6423	78.8525	77.4079	73.6511	84.6107	67.9351	66.9348	62.9806	79.4213	78.2698	87.0843	AIP	aryl hydrocarbon receptor interacting protein
ENSG00000232434	7.88779	6.52878	7.73573	7.4623	7.92519	7.48237	7.76172	8.19852	8.18858	8.50861	8.74682	8.58712	7.70112	7.15832	8.41733	6.89739	6.16215	7.51272	AJM1	apical junction component 1 homolog
ENSG00000129474	38.2057	36.3318	37.3743	46.994	48.3566	47.7204	36.5663	36.509	35.1946	48.105	49.5838	48.2729	44.0634	46.3492	46.2153	51.9792	54.0661	53.1066	AJUBA	ajuba LIM protein
ENSG00000106992	115.391	111.209	115.087	96.2943	97.1223	101.654	113.129	118.782	126.076	83.318	83.7152	93.4804	135.452	119.703	104.798	87.3694	83.4137	90.4617	AK1	adenylate kinase 1
ENSG00000004455	203.085	214.914	212.983	165.666	171.2	165.273	199.409	203.38	220.331	157.616	159.651	170.218	189.28	182.698	177.044	164.045	160.723	169.797	AK2	adenylate kinase 2
ENSG00000147853	30.5322	37.9635	37.6313	42.3736	42.2314	46.4336	30.2366	33.7699	27.462	43.0958	41.1684	38.8751	27.1909	31.1822	34.5279	42.4326	44.27	43.4787	AK3	adenylate kinase 3
ENSG00000162433	45.6713	45.8732	47.9243	29.3696	31.8696	30.1858	38.7841	38.8002	42.7181	30.1909	29.1753	27.679	28.822	33.2143	34.1835	29.1197	31.1041	30.1646	AK4	adenylate kinase 4
ENSG00000154027	0.914042	0.275288	0.21715	0.692098	0.503439	0.373498	0.744039	0.461214	0.237601	0.376406	0.783019	0.309081	0	0.384785	1.10875	0.520867	0.896333	1.34326	AK5	adenylate kinase 5
ENSG00000085231	54.5822	79.7968	70.9859	79.2798	73.5361	69.1252	66.8129	64.2575	12.9533	77.3568	76.017	75.6424	72.0183	69.9384	70.7944	81.5231	68.8358	80.8548	AK6	adenylate kinase 6
ENSG00000140057	8.64646	9.95435	8.67359	9.87708	10.9463	12.1375	6.15794	6.38887	5.36222	8.05517	8.36705	8.16182	6.01416	5.8965	5.90408	9.02924	7.97245	7.34258	AK7	adenylate kinase 7
ENSG00000165695	4.8411	4.40375	4.50939	7.44989	8.93349	8.936	3.11391	3.39254	3.2249	5.77106	5.82308	6.34276	2.90674	3.65712	3.03795	3.49813	4.01383	3.60624	AK8	adenylate kinase 8
ENSG00000155085	5.05395	7.41686	5.50744	10.3897	9.15188	11.5014	4.48882	5.06184	3.29738	8.3801	8.2906	7.90824	4.29492	4.23972	5.25254	10.0791	8.51077	7.84042	AK9	adenylate kinase 9
ENSG00000121057	22.1606	22.5789	25.2962	19.5144	20.3668	20.6355	25.3153	24.2907	27.2809	20.9397	21.9882	19.5152	18.1628	18.9271	18.6985	20.927	21.2864	21.3148	AKAP1	A-kinase anchoring protein 1
ENSG00000108599	23.1799	26.8438	31.3282	32.7489	33.2614	34.9046	27.6242	26.7965	24.5589	36.848	35.175	26.1515	21.0117	24.0477	21.2763	33.9084	33.4816	30.2181	AKAP10	A-kinase anchoring protein 10
ENSG00000023516	9.09473	10.2209	11.558	17.5231	15.9392	16.6633	11.6428	11.0293	7.88521	19.5817	18.2421	13.7343	8.84907	10.7545	12.8305	20.2032	21.9648	19.8553	AKAP11	A-kinase anchoring protein 11
ENSG00000131016	1.17654	1.28032	1.40817	0.973919	0.943796	0.884635	1.14662	1.17406	1.15756	1.10435	1.14441	0.802218	1.25545	1.47968	1.45498	1.59972	1.69665	1.64695	AKAP12	A-kinase anchoring protein 12
ENSG00000170776	6.81073	7.30012	8.31364	8.63549	9.3049	9.59084	7.74887	7.13113	5.37516	12.5965	11.0285	7.77422	4.64415	6.82744	9.044	10.1314	10.8778	9.63761	AKAP13	A-kinase anchoring protein 13
ENSG00000186471	2.25548	2.59884	1.53813	2.98706	2.35264	2.29776	1.32307	1.45409	2.35353	1.38612	2.32622	1.5838	0.454379	0.859081	0.753643	0.662559	0.201757	0.252	AKAP14	A-kinase anchoring protein 14
ENSG00000197976	17.4544	15.3799	16.7719	21.6138	21.9347	22.9483	17.985	16.3639	16.7582	19.3594	21.0008	20.9341	11.9938	11.2111	13.1266	19.3742	19.952	19.7598	AKAP17A	A-kinase anchoring protein 17A
ENSG00000179841	1.14344	1.37486	1.39979	1.12112	1.04397	1.19573	1.60949	1.63927	1.08151	1.51385	1.44741	1.3867	1.08234	0.92796	1.20976	1.09298	1.14695	1.18535	AKAP5	A-kinase anchoring protein 5
ENSG00000151320	1.73964	2.40461	2.79412	4.85971	5.40464	5.57113	2.51336	2.60925	1.52736	6.6889	6.47317	4.51415	1.9607	2.17363	3.04144	7.13124	8.91196	5.95554	AKAP6	A-kinase anchoring protein 6
ENSG00000118507	2.37652	2.09774	2.04574	1.78447	1.88733	1.85961	2.39714	2.38085	1.42305	1.40343	1.49184	1.39945	1.68041	1.55555	1.90035	1.46476	1.46304	1.34645	AKAP7	A-kinase anchoring protein 7
ENSG00000105127	12.4287	11.2807	11.7335	10.5396	12.4983	12.4346	11.4985	11.9683	14.4624	11.1558	12.3216	11.7346	9.86632	9.07337	10.127	12.0614	13.8125	11.7658	AKAP8	A-kinase anchoring protein 8
ENSG00000011243	40.3262	33.4011	30.1284	35.4833	39.0516	39.682	33.1915	31.0852	36.3826	39.0773	40.1865	36.2246	33.1251	29.7358	29.3559	39.523	38.2205	38.5322	AKAP8L	A-kinase anchoring protein 8 like
ENSG00000127914	11.2586	10.6278	10.945	40.8362	34.9869	35.2888	11.4288	10.1527	8.30736	38.5118	40.5585	30.2249	10.7155	9.66346	9.39607	40.8109	37.6339	36.0689	AKAP9	A-kinase anchoring protein 9
ENSG00000166452	24.1179	24.3523	27.5386	26.181	26.428	27.7078	27.5936	25.1275	27.1029	23.0941	23.6803	22.6979	23.8824	23.9052	24.0153	26.0279	23.3336	28.4024	AKIP1	A-kinase interacting protein 1
ENSG00000174574	30.22	37.0925	34.8005	36.8131	33.4708	34.1414	31.6392	29.8609	25.5649	32.6628	34.0489	29.6453	23.8054	25.9732	28.7255	36.4538	40.7635	35.9122	AKIRIN1	akirin 1
ENSG00000135334	20.0624	21.6097	21.6521	20.3982	19.4601	18.2922	20.2831	22.6947	22.5747	17.0239	19.8279	19.5571	16.1643	16.3855	18.5661	16.9913	18.7422	18.4332	AKIRIN2	akirin 2
ENSG00000106948	4.13608	4.04048	4.61478	4.92284	5.78803	5.35266	4.04692	3.723	4.40046	3.67468	5.19855	3.54512	2.92409	3.03216	3.24783	2.80523	3.22275	3.4839	AKNA	AT-hook transcription factor
ENSG00000162641	1.12655	0.839612	0.845044	0.967696	0.890396	1.0721	1.00981	0.62332	1.18214	0.57341	0.837886	0.299259	0.48677	0.718681	0.384977	0.319183	0.758932	0.73789	AKNAD1	AKNA domain containing 1
ENSG00000117448	103.812	106.286	104.184	159.453	169.241	167.627	104.966	104.953	112.071	142.956	150.624	160.576	147.529	135.097	131.979	166.617	186.756	183.686	AKR1A1	aldo-keto reductase family 1 member A1
ENSG00000187134	0.386572	0.207687	0.750164	0.55601	0.299806	0.484258	0.668306	0.854435	0.385	0.360003	0.620206	0.269465	0.308324	0.385206	0.236678	0.449863	0.294645	0.437814	AKR1C1	aldo-keto reductase family 1 member C1
ENSG00000151632	0.108032	0	0.451107	0.289502	0.024886	0.086721	0.248466	0.615778	0.410964	0.219993	0.395177	0.272183	0.239234	0.487214	0.322532	0	0.290041	0.071646	AKR1C2	aldo-keto reductase family 1 member C2
ENSG00000196139	0.386107	0.266846	0.29045	0.533325	0.533005	0.30432	0.388842	0.724009	0.382349	0.797929	0.58372	0.771967	0.33155	0.168363	0.244623	0.351817	0.37039	0.441544	AKR1C3	aldo-keto reductase family 1 member C3
ENSG00000165568	5.23465	6.829	8.23983	6.9768	5.20665	4.27363	5.61472	6.35679	6.28554	4.81238	6.37215	5.33549	4.06703	5.22432	5.28856	4.99284	3.26347	6.32942	AKR1E2	aldo-keto reductase family 1 member E2
ENSG00000053371	111.961	115.84	119.176	100.118	107.555	101.515	94.6215	106.141	119.108	81.332	84.5077	91.7125	111.702	111.397	104.895	79.3314	83.2086	86.9609	AKR7A2	aldo-keto reductase family 7 member A2
ENSG00000162482	5.30736	4.90468	5.63744	2.80539	2.79331	2.96956	4.9405	4.63629	5.3617	1.91105	1.42074	2.36502	3.24902	2.43913	2.69371	1.20799	1.68455	1.89034	AKR7A3	aldo-keto reductase family 7 member A3
ENSG00000211454	1.35981	1.2122	1.19587	0.740341	0.70801	0.610285	0.987168	0.517947	0.572558	0.888561	0.482004	0.540582	0.628382	0.488312	0.513557	0.559409	0.687873	0.6347	AKR7L	aldo-keto reductase family 7 like (gene/pseudogene)
ENSG00000142208	176.957	157.748	171.832	211.469	230.843	231.099	160.489	161.055	199.115	214.464	215.321	205.686	159.033	172.835	160.238	201.017	216.073	214.426	AKT1	AKT serine/threonine kinase 1
ENSG00000204673	46.9807	44.954	47.2431	38.8365	42.0815	41.7328	43.3232	45.53	53.5605	39.1083	41.8132	38.8206	42.4962	44.4675	44.4259	35.9223	38.4556	39.0121	AKT1S1	AKT1 substrate 1
ENSG00000105221	89.8142	90.7722	90.9975	98.2111	108.254	111.041	93.654	92.1764	114.441	121.407	113.634	101.733	79.2598	90.1771	92.9789	100.315	112.615	110.935	AKT2	AKT serine/threonine kinase 2
ENSG00000117020	0.166812	0.381816	0.262765	0.463396	0.554154	0.337679	0.299988	0.266662	0.333257	0.283018	0.347558	0.415672	0.140734	0.24564	0.265861	0.22477	0.413957	1.23455	AKT3	AKT serine/threonine kinase 3
ENSG00000166971	37.8634	42.9715	45.685	65.4262	58.981	59.9514	38.0639	41.8077	33.3089	53.1356	59.5683	54.5444	42.6439	36.1223	37.3858	60.609	60.8249	65.0853	AKTIP	AKT interacting protein
ENSG00000148218	37.8081	36.6256	38.3974	73.4511	75.5525	79.1726	36.7508	38.5242	36.6109	71.3181	77.2717	66.5276	37.7262	40.4856	40.3967	74.9059	82.8507	79.3534	ALAD	aminolevulinate dehydratase
ENSG00000023330	32.5919	32.7185	34.9867	35.189	36.1739	35.867	32.8698	33.2776	34.3035	38.1309	41.7417	37.48	32.1199	34.2021	33.8394	40.7436	44.0528	40.3199	ALAS1	5'-aminolevulinate synthase 1
ENSG00000170017	47.6533	57.9948	56.8284	129.206	119.893	126.744	61.848	61.9298	44.6859	141.238	140.292	124.275	34.3444	37.9046	39.859	106.682	107.301	100.972	ALCAM	activated leukocyte cell adhesion molecule
ENSG00000161618	22.175	19.8544	21.5591	21.041	20.7221	21.1703	21.9866	22.2867	25.581	18.8234	20.2844	22.137	25.0476	24.92	22.648	17.1369	19.7985	18.3046	ALDH16A1	aldehyde dehydrogenase 16 family member A1
ENSG00000059573	59.2663	61.7761	65.1357	70.8549	70.0342	72.2197	63.367	60.5212	59.9146	67.5247	67.4265	65.9504	58.0571	56.2779	61.1905	67.3809	68.7074	67.3621	ALDH18A1	aldehyde dehydrogenase 18 family member A1
ENSG00000128918	0	0	0.08474	0.19337	0	0.074713	0	0	0	0	0.166336	0.246014	0	0	0	0	0.630481	0.827918	ALDH1A2	aldehyde dehydrogenase 1 family member A2
ENSG00000184254	4.67158	5.55878	6.9201	30.848	34.2345	28.3616	6.66472	6.65408	8.6146	45.6891	41.2079	37.4266	9.89875	10.5805	11.77	31.639	33.8015	32.3042	ALDH1A3	aldehyde dehydrogenase 1 family member A3
ENSG00000137124	10.4032	11.9705	12.7078	6.6371	6.37012	6.46886	11.8378	12.5921	13.6636	6.3691	6.53356	6.84962	9.34495	10.8119	10.3582	6.44572	5.46089	6.25389	ALDH1B1	aldehyde dehydrogenase 1 family member B1
ENSG00000136010	4.04172	4.69844	4.30478	2.83215	2.67861	2.84586	3.70877	3.64131	2.81476	2.95368	2.74964	1.95274	2.87289	3.49803	3.43737	2.84732	2.53034	2.73628	ALDH1L2	aldehyde dehydrogenase 1 family member L2
ENSG00000111275	24.6479	20.7824	22.3677	27.1123	29.552	30.94	24.2603	23.0797	27.8353	35.2696	36.0192	36.4828	28.3528	30.9549	26.6994	25.817	24.4335	28.0677	ALDH2	aldehyde dehydrogenase 2 family member
ENSG00000072210	74.9635	84.2339	88.822	91.2954	86.6918	90.1822	81.6057	76.6472	51.1017	88.1664	84.2846	71.1809	68.0307	70.4152	66.7609	90.9167	83.8332	79.5384	ALDH3A2	aldehyde dehydrogenase 3 family member A2
ENSG00000006534	23.9524	21.9389	22.9966	11.2635	11.5293	12.4537	16.876	15.9543	17.6139	12.2016	11.2092	11.8505	22.2017	22.5011	20.8606	12.8827	14.0291	14.5614	ALDH3B1	aldehyde dehydrogenase 3 family member B1
ENSG00000132746	37.0591	33.3941	37.8655	43.1355	48.8994	49.136	42.3051	44.8041	47.2176	45.9845	50.8112	43.6072	38.2807	43.4155	44.7998	53.163	56.3412	48.4919	ALDH3B2	aldehyde dehydrogenase 3 family member B2
ENSG00000159423	44.1301	40.8329	47.3295	58.6153	65.0374	62.6307	42.0518	46.1565	55.4796	55.0589	54.928	59.5161	48.1652	51.4395	48.6241	53.9723	64.623	61.9753	ALDH4A1	aldehyde dehydrogenase 4 family member A1
ENSG00000112294	24.4811	24.3534	28.5729	13.5732	14.1268	14.9357	23.5018	24.1648	23.6325	15.0694	15.4088	12.4541	17.2697	18.7146	18.5819	14.2092	15.1752	14.7318	ALDH5A1	aldehyde dehydrogenase 5 family member A1
ENSG00000119711	51.6945	56.6555	62.1682	77.5315	73.6179	73.1133	56.757	58.3023	55.0058	79.8888	71.9287	65.238	60.1675	72.1007	80.5129	78.0062	86.2727	81.1628	ALDH6A1	aldehyde dehydrogenase 6 family member A1
ENSG00000164904	128.432	140.184	138.846	297.298	283.961	283.083	135.766	125.372	116.246	234.372	253.951	260.782	160.46	158.427	132.751	250.681	245.091	243.985	ALDH7A1	aldehyde dehydrogenase 7 family member A1
ENSG00000143149	109.392	121.979	125.429	108.307	103.125	106.542	120.747	120.463	105.279	106.741	101.831	110.068	116.963	116.98	116.245	102.329	104.319	101.438	ALDH9A1	aldehyde dehydrogenase 9 family member A1
ENSG00000149925	1186.64	1058.79	1153.86	1316.11	1401.93	1401.66	1117.28	1147.89	1405.99	1169.92	1216.95	1297.08	1112.94	1055.24	1041.95	949.141	970.871	972.675	ALDOA	aldolase, fructose-bisphosphate A
ENSG00000109107	68.7696	68.8149	72.0799	77.0345	77.2288	82.7963	76.703	80.0356	88.0801	74.9597	82.5901	77.5804	70.4271	73.3523	67.7925	61.9493	65.787	62.4548	ALDOC	aldolase, fructose-bisphosphate C
ENSG00000033011	39.5206	38.4549	41.1309	41.8687	44.1335	41.1013	38.2284	37.2791	42.0381	41.3337	39.1272	40.6317	42.5956	41.02	40.3161	40.1985	42.5429	44.9924	ALG1	ALG1 chitobiosyldiphosphodolichol beta-mannosyltransferase
ENSG00000139133	11.9813	15.4025	15.0906	8.48125	7.14052	10.123	15.6081	17.9561	11.6506	10.1006	9.41542	10.5833	11.8718	11.247	12.2287	8.72489	8.92061	8.50492	ALG10	ALG10 alpha-1,2-glucosyltransferase
ENSG00000175548	14.9184	16.3618	13.3846	14.7358	13.5981	14.064	19.8824	19.6857	15.6973	16.1913	17.3467	10.8722	12.0563	14.1249	16.5047	13.8459	17.973	14.2569	ALG10B	ALG10 alpha-1,2-glucosyltransferase B
ENSG00000253710	18.4975	20.6582	19.9757	23.2831	26.909	22.5576	19.005	18.6521	15.3724	26.8832	25.4086	18.5565	12.9924	16.7839	18.4804	25.8102	29.756	27.474	ALG11	ALG11 alpha-1,2-mannosyltransferase
ENSG00000182858	9.96696	10.4224	12.5878	17.2744	19.9775	18.5921	9.99228	9.83894	11.8594	16.5307	14.6096	13.9588	9.5342	10.0097	10.2349	15.8775	14.4153	17.9474	ALG12	ALG12 alpha-1,6-mannosyltransferase
ENSG00000101901	31.71	36.9172	30.6577	47.8724	40.4097	38.1179	34.1428	28.9316	25.5867	45.2241	38.8656	36.2244	27.5189	29.2319	30.932	45.7327	42.8802	41.3597	ALG13	ALG13 UDP-N-acetylglucosaminyltransferase subunit
ENSG00000172339	8.15356	7.68386	5.63256	5.70939	7.20161	7.97464	5.38723	4.17051	4.9192	9.03052	7.4565	4.82178	5.75888	5.37102	5.85001	3.68039	6.15998	9.15429	ALG14	ALG14 UDP-N-acetylglucosaminyltransferase subunit
ENSG00000189366	12.9612	12.8512	11.465	7.32668	7.76281	8.43324	11.4807	10.0505	12.4782	7.29573	8.39588	10.6938	3.76404	3.01214	3.92912	3.25373	3.28631	4.37644	ALG1L	ALG1 chitobiosyldiphosphodolichol beta-mannosyltransferase like
ENSG00000251287	0.566687	0.258605	0.547718	0.151503	0.194305	0.45906	0.897821	0.484099	0.243175	0.201761	0.164801	0.191235	0.073648	0.091653	0.207726	0.395306	0.111695	0.420053	ALG1L2	ALG1 chitobiosyldiphosphodolichol beta-mannosyltransferase like 2
ENSG00000248671	0.396525	0.443538	0.745197	0.392632	0.47684	0.448947	0.467434	0.28129	0.223879	0.635558	0.627971	0.542893	0.316666	0.230511	0.383569	0.551626	0.848	0.706523	ALG1L9P	ALG1 like 9, pseudogene
ENSG00000119523	21.9119	24.6088	24.0587	31.8556	32.0837	32.1136	26.1019	23.7516	21.5651	30.4187	30.8342	29.8753	23.02	23.0875	24.2565	31.2618	31.3702	28.4105	ALG2	ALG2 alpha-1,3/1,6-mannosyltransferase
ENSG00000214160	139.114	138.571	146.058	106.243	110.03	106.821	130.19	135.517	142.513	99.4772	104.814	95.7364	120.833	122.234	125.49	91.6888	99.3936	98.0661	ALG3	ALG3 alpha-1,3- mannosyltransferase
ENSG00000120697	44.3435	44.1543	45.2896	44.6106	47.1741	47.3234	44.0302	41.8832	37.1442	41.5018	42.1531	43.8975	39.1149	38.7193	36.4351	43.2367	42.3326	39.6212	ALG5	ALG5 dolichyl-phosphate beta-glucosyltransferase
ENSG00000088035	13.8039	17.7385	16.6692	14.336	14.1919	13.7809	18.958	17.7005	10.915	14.4673	14.2671	14.6586	15.721	16.4525	16.8446	15.178	15.4281	13.9541	ALG6	ALG6 alpha-1,3-glucosyltransferase
ENSG00000159063	102.691	117.825	116.927	87.7149	81.8268	79.1609	107.289	108.128	88.4115	83.6535	79.8855	80.3617	101.655	100.21	103.638	79.5544	77.5532	78.6125	ALG8	ALG8 alpha-1,3-glucosyltransferase
ENSG00000086848	29.2499	29.8296	32.5255	21.1126	21.8714	22.0176	28.9386	29.8139	28.0014	21.465	21.0051	18.8566	23.6948	23.9904	29.5729	21.5643	22.4703	19.3927	ALG9	ALG9 alpha-1,2-mannosyltransferase
ENSG00000100601	26.4756	26.8018	27.7738	23.2621	23.3101	24.2568	27.8377	29.9874	27.3287	23.0628	22.6756	20.1325	24.0187	23.5748	23.7765	26.4703	25.0789	25.771	ALKBH1	alkB homolog 1, histone H2A dioxygenase
ENSG00000189046	28.9961	25.906	28.5908	17.71	21.1848	20.8288	35.1876	31.7819	41.5646	23.003	24.165	26.0456	24.4007	23.3756	22.5155	18.7776	18.226	20.4589	ALKBH2	alkB homolog 2, alpha-ketoglutarate dependent dioxygenase
ENSG00000166199	38.0112	40.5296	41.2655	47.8349	47.612	50.908	39.4104	35.5003	36.4274	47.1894	54.3599	49.824	43.2766	39.092	40.8506	51.7517	48.1217	49.6501	ALKBH3	alkB homolog 3, alpha-ketoglutaratedependent dioxygenase
ENSG00000160993	11.1008	10.7038	11.4633	11.8779	13.7735	12.6762	11.1959	10.5988	14.2346	11.9535	12.4856	12.4103	11.5184	11.8882	9.81763	10.4447	12.877	12.7769	ALKBH4	alkB homolog 4, lysine demethylase
ENSG00000091542	30.1425	30.1416	33.7626	36.0852	35.276	37.7914	30.1534	30.8511	34.9285	33.5992	33.6256	34.1281	28.4518	31.0429	32.952	31.4422	33.4629	34.6372	ALKBH5	alkB homolog 5, RNA demethylase
ENSG00000239382	18.1887	18.7646	19.5665	21.1681	22.2837	22.5878	17.2287	18.2794	18.8397	18.4129	23.2273	19.8286	18.8749	15.5081	17.5239	16.4924	22.2576	19.6724	ALKBH6	alkB homolog 6
ENSG00000125652	58.9758	52.5676	60.1288	58.5178	60.8661	62.2501	46.499	58.3598	64.0297	52.6965	53.8796	65.8845	75.0277	64.4573	57.5474	50.4416	59.2295	57.5379	ALKBH7	alkB homolog 7
ENSG00000137760	5.44507	6.88274	6.34313	5.37959	4.51759	5.06832	5.96895	6.08977	5.89437	4.99349	5.27223	4.3792	4.76106	5.34294	5.03918	6.5618	6.268	5.68544	ALKBH8	alkB homolog 8, tRNA methyltransferase
ENSG00000116127	2.42328	2.93565	3.69903	2.87137	2.81933	3.11424	3.16831	3.01772	3.09716	3.31628	2.81266	2.72436	2.50769	2.36746	3.02129	4.22528	2.61427	3.03901	ALMS1	ALMS1 centrosome and basal body associated protein
ENSG00000230002	0.683505	0.325927	0.383409	0.114101	0.126747	0.198015	0.369077	0.275619	0.292997	0.108796	0.090252	0.045935	0.195171	0.322153	0.317235	0.207343	0.15045	0.139306	ALMS1-IT1	ALMS1 intronic transcript 1
ENSG00000163016	0.016424	0.04721	0.086612	0.083151	0.298408	0.043284	0.123609	0.03766	0.145885	0.181373	0.272365	0.196437	0.090001	0.047946	0.062085	0.203713	0.172264	0.146627	ALMS1P1	ALMS1 pseudogene 1
ENSG00000215067	6.04507	7.56202	5.88596	10.2183	10.9991	10.1206	4.43911	6.57813	6.26363	8.47723	11.9992	11.5023	8.01304	6.92362	7.5674	11.1547	11.7546	9.85364	ALOX12-AS1	ALOX12 antisense RNA 1
ENSG00000179477	0.67409	0.968589	1.02714	0.476748	0.275558	0.154602	0.351196	0.68653	0.475019	0.12036	0.179259	0.155378	1.2066	1.22337	1.3206	0.494383	0.208907	0.934506	ALOX12B	arachidonate 12-lipoxygenase, 12R type
ENSG00000161905	6.95858	6.10885	7.61554	5.12488	4.92962	5.09861	7.30656	7.90061	8.56319	8.20006	8.02406	7.11067	3.44233	3.78506	3.68878	6.11925	4.88401	4.51735	ALOX15	arachidonate 15-lipoxygenase
ENSG00000012779	0.097206	0.20482	0.154087	0.37396	0.72379	0.257838	0.053162	0.131807	0.049863	0.018366	0.085783	0.032861	0.016774	0.011188	0.038712	0	0.020244	0.073788	ALOX5	arachidonate 5-lipoxygenase
ENSG00000132965	0.037397	0.092266	0.137655	0.456869	0.272699	0.343453	0.082751	0	0.04364	0.109504	0.360293	0.153827	0.079967	0	0.037192	0.160224	0.060404	0.184258	ALOX5AP	arachidonate 5-lipoxygenase activating protein
ENSG00000179148	5.76438	5.37993	6.07848	3.90419	4.3259	4.2448	5.39794	4.89811	5.41103	3.84194	4.67176	3.41271	4.68913	4.72529	4.84193	4.1174	5.0727	4.0517	ALOXE3	arachidonate lipoxygenase 3
ENSG00000073331	4.87624	5.3474	5.64166	8.7166	8.30847	7.55894	6.38591	6.632	4.93057	9.61903	10.8357	7.71063	4.45562	6.13933	6.78681	12.2508	11.7329	10.7051	ALPK1	alpha kinase 1
ENSG00000136383	0.585435	0.197623	0.211416	0.437099	0.702161	0.435803	0.426003	0.237325	0.611846	0.542018	0.557564	0.667917	0.149043	0.121123	0.170312	0.421077	0.95648	1.2629	ALPK3	alpha kinase 3
ENSG00000162551	0.214128	0.271246	0.20146	0.173022	0.197463	0.210839	0.175002	0.258135	0.215917	0.139565	0.128521	0.154486	0.185567	0.2507	0.333277	0.029309	0.046682	0.068112	ALPL	alkaline phosphatase, biomineralization associated
ENSG00000003393	7.36958	8.74804	8.97044	10.8875	10.5898	12.3409	9.46666	8.48891	6.81866	12.7047	13.5404	10.0491	8.51458	8.53909	9.16154	15.8495	14.9135	13.6272	ALS2	alsin Rho guanine nucleotide exchange factor ALS2
ENSG00000178038	5.09673	4.40194	3.17324	7.13162	7.74229	8.09365	3.66914	2.98594	3.5865	5.90173	7.78578	5.73236	2.21633	1.80425	2.3253	5.31486	6.49843	6.07425	ALS2CL	ALS2 C-terminal like
ENSG00000183684	198.547	189.388	193.811	104.434	119.629	111.522	192.357	190.139	250.682	110.779	106.292	123.232	185.934	175.141	163.655	95.5147	98.149	104.694	ALYREF	Aly/REF export factor
ENSG00000242110	15.7443	17.304	18.3732	20.5553	18.2767	19.1178	18.2186	17.6279	15.8358	22.4429	20.7817	19.4732	17.1072	17.6469	14.8087	21.8298	22.2603	20.8708	AMACR	alpha-methylacyl-CoA racemase
ENSG00000110497	19.6108	16.7594	17.4215	16.0847	17.1185	18.8531	16.3782	16.9483	19.2224	15.5846	18.0557	14.3958	13.3629	16.5546	17.7183	17.6899	17.1061	17.7352	AMBRA1	autophagy and beclin 1 regulator 1
ENSG00000123505	49.9864	58.9364	59.2046	27.897	26.5397	27.0928	55.5062	55.0886	48.0331	29.0834	29.8659	27.7854	39.5755	39.5874	42.237	26.5975	26.8897	24.569	AMD1	adenosylmethionine decarboxylase 1
ENSG00000139344	0.701254	0.161093	0.49493	1.64698	0.808679	1.73693	0.688826	1.19504	1.88764	1.39938	0.863684	0.959214	1.47067	0.487926	0.603887	1.36952	2.27609	1.41783	AMDHD1	amidohydrolase domain containing 1
ENSG00000162066	22.2167	20.7494	20.7828	29.9543	31.5819	32.0502	23.1675	24.0916	24.9759	36.1967	33.9342	37.6864	20.4203	19.1287	19.9246	33.7891	37.9632	39.9765	AMDHD2	amidohydrolase domain containing 2
ENSG00000184675	1.06563	1.09952	1.11177	0.609148	0.606088	0.625519	1.08661	1.05065	1.17091	0.748888	0.687061	0.553743	0.634229	0.818327	0.914564	0.740284	0.765386	0.720221	AMER1	APC membrane recruitment protein 1
ENSG00000159461	107.396	110.325	113	153.172	158.03	149.202	88.9022	88.8876	90.6315	134.655	131.072	141.845	108.088	100.243	98.1528	147.213	151.148	151.806	AMFR	autocrine motility factor receptor
ENSG00000104899	19.6915	13.5064	10.6153	10.9998	12.9822	13.773	17.1478	15.793	13.1153	11.7206	14.0611	10.4417	9.5022	6.27847	8.87215	10.0904	9.89485	11.655	AMH	anti-Mullerian hormone
ENSG00000181754	3.72098	4.05215	4.53812	5.98411	6.61202	7.16073	4.75092	3.80499	4.32088	7.91398	7.87212	6.61945	3.91473	4.08243	4.95975	7.12635	9.05046	7.30407	AMIGO1	adhesion molecule with Ig like domain 1
ENSG00000139211	10.901	12.9233	11.8517	42.1478	40.2203	39.2776	9.71583	8.75593	8.45003	33.0413	29.8752	29.1676	9.77614	9.77762	10.6484	31.703	28.6132	31.9484	AMIGO2	adhesion molecule with Ig like domain 2
ENSG00000101935	4.01799	4.88149	5.2125	3.93519	4.16543	3.82621	5.67725	5.55187	3.9617	5.20932	4.39715	4.72077	3.89606	4.07045	5.07477	4.38272	4.1819	4.34941	AMMECR1	AMMECR nuclear protein 1
ENSG00000144233	8.71306	9.3101	10.0135	12.544	12.5659	13.2217	9.81884	9.58244	8.91918	12.5321	12.6588	11.2501	7.71451	8.97679	10.2407	13.2392	14.9691	12.8589	AMMECR1L	AMMECR1 like
ENSG00000151743	9.21696	10.0148	9.52143	16.6357	15.535	14.3895	8.25488	8.42695	5.9966	13.6723	12.7386	14.0362	6.27034	7.72422	6.71911	15.3296	12.0894	13.9847	AMN1	antagonist of mitotic exit network 1 homolog
ENSG00000126016	0.655048	1.32911	0.971922	1.96309	2.1138	1.63444	1.37179	1.38637	1.10247	3.38123	3.5639	2.57731	0.846799	1.58322	1.50793	2.90997	3.24164	3.14496	AMOT	angiomotin
ENSG00000166025	1.51319	1.59083	1.78603	11.02	10.4868	11.8183	2.34089	2.34398	2.24445	16.7256	17.1056	14.4757	3.06492	3.49559	3.90913	14.9257	16.3229	13.8854	AMOTL1	angiomotin like 1
ENSG00000114019	40.2112	39.8874	43.1429	90.8436	90.3496	92.9303	46.2976	44.7229	46.9812	98.5894	100.594	87.2128	67.5549	75.3438	71.9909	94.8662	100.252	96.0718	AMOTL2	angiomotin like 2
ENSG00000116337	15.7329	13.8556	13.4669	7.85087	9.32937	8.72454	15.7944	15.1483	17.2428	9.89482	10.8686	8.5777	11.4897	10.0505	11.6729	9.70785	9.1574	10.7527	AMPD2	adenosine monophosphate deaminase 2
ENSG00000133805	0.609129	0.337625	0.633034	1.17128	0.503868	0.850995	0.632229	0.619159	0.457166	1.50073	1.08064	0.697585	0.368073	1.00637	0.56377	0.897758	0.868997	0.981083	AMPD3	adenosine monophosphate deaminase 3
ENSG00000078053	0.768329	0.446573	0.745174	0.947008	1.12257	1.45381	0.467547	0.509441	0.413885	0.997575	1.43488	0.935489	0.268482	0.235381	0.433917	0.274933	0.269927	0.36184	AMPH	amphiphysin
ENSG00000145020	0.670301	0.332948	0.072871	0.939975	0.632547	0.531454	0.326784	0.243586	0.388552	0.497339	0.79048	0.451614	0.426368	0.115938	0.11428	0.26648	0.277592	0.588543	AMT	aminomethyltransferase
ENSG00000187689	0.363145	0.545292	0.35856	0.678376	0.582742	0.409098	0.68706	1.044	0.964683	1.72132	1.89712	1.16508	0.85472	0.463268	0.545351	0.712694	0.776043	0.651775	AMTN	amelotin
ENSG00000174945	32.234	29.4078	35.0024	35.8745	37.0064	39.1483	30.7395	32.9262	37.3418	37.9816	35.9613	28.1467	22.9587	28.8025	29.761	34.849	38.9203	35.1132	AMZ1	archaelysin family metallopeptidase 1
ENSG00000196704	99.1176	117.625	117.244	121.376	112.169	118.399	117.994	126.316	87.3715	116.25	120.41	114.815	129.62	120.96	116.996	119.47	118.841	115.481	AMZ2	archaelysin family metallopeptidase 2
ENSG00000214174	5.94464	7.21769	7.8119	8.93637	7.48107	6.99173	7.71803	8.2157	6.86316	8.74716	8.12497	9.22779	7.21956	9.00463	7.59963	9.27943	8.37808	7.34811	AMZ2P1	archaelysin family metallopeptidase 2 pseudogene 1
ENSG00000153107	13.9736	14.6622	19.5373	12.3635	13.97	12.2041	17.7016	15.2617	13.3487	16.0846	13.59	12.5301	9.36602	12.2756	15.6937	14.0362	12.5626	14.5026	ANAPC1	anaphase promoting complex subunit 1
ENSG00000164162	18.0546	21.3218	20.1581	23.7147	20.1554	20.163	21.6931	20.6194	20.0336	18.856	20.6556	20.8733	20.2743	18.0254	17.9522	20.1058	20.9832	21.4681	ANAPC10	anaphase promoting complex subunit 10
ENSG00000141552	292.283	282.693	308.705	235.774	261.341	262.842	263.822	291.179	343.32	228.621	236.436	267.947	321.488	299.287	263.408	225.674	231.229	221.464	ANAPC11	anaphase promoting complex subunit 11
ENSG00000129055	83.7176	102.556	93.9624	130.99	121.806	115.551	87.6999	97.4978	63.0754	132.006	128.048	138.418	115.652	113.706	104.232	128.65	124.59	127.548	ANAPC13	anaphase promoting complex subunit 13
ENSG00000110200	71.8761	80.7452	74.4415	67.1032	62.3304	67.4239	74.1898	73.9469	69.2573	57.0385	62.4043	60.0633	81.2527	73.2645	71.0786	60.0344	60.1525	58.0484	ANAPC15	anaphase promoting complex subunit 15
ENSG00000166295	52.6642	69.4665	66.9321	107.532	95.5609	96.1887	63.7921	61.7502	53.032	95.8026	85.678	86.1751	77.5237	76.7832	70.4734	102.87	94.0825	94.9621	ANAPC16	anaphase promoting complex subunit 16
ENSG00000233673	0.357898	0.333179	0.199455	0.131727	0.210765	0.37262	0.523357	0.261619	0.22886	0.230232	0.1928	0.195495	0.093858	0.646303	0.202412	0.271487	0.168511	0.329529	ANAPC1P1	anaphase promoting complex subunit 1 pseudogene 1
ENSG00000176248	51.6564	45.5002	44.0079	49.738	53.1784	55.8268	48.6527	44.8683	48.062	48.6439	51.109	46.8716	34.9052	34.0919	37.267	46.5819	50.3372	53.4268	ANAPC2	anaphase promoting complex subunit 2
ENSG00000053900	12.7553	13.8059	13.3381	16.6079	14.1987	15.8656	15.1064	14.4916	9.38767	15.7415	15.8081	14.4768	11.7948	10.4308	11.4191	17.0995	17.1477	16.8104	ANAPC4	anaphase promoting complex subunit 4
ENSG00000089053	150.488	170.071	157.028	140.016	137.95	144.119	167.199	159.231	132.205	137.034	139.758	124.455	127.336	130.199	130.239	137.445	131.464	128.991	ANAPC5	anaphase promoting complex subunit 5
ENSG00000196510	99.409	106.934	109.14	94.1224	85.7151	91.7935	111.426	104.4	97.3276	87.1325	84.6609	83.9578	86.5407	81.1811	88.7096	85.5908	86.6852	84.077	ANAPC7	anaphase promoting complex subunit 7
ENSG00000214274	2.93686	2.37694	2.60359	3.00624	3.01242	4.13378	2.28124	2.1274	2.83795	3.30649	3.12458	3.70276	2.57733	2.71391	2.93477	3.43189	3.08034	4.40005	ANG	angiogenin
ENSG00000013523	28.305	28.9708	29.4203	18.9541	22.4551	23.4847	30.6161	28.7541	28.3492	22.9608	24.5757	18.8247	19.3661	22.893	25.1435	22.8146	23.4862	22.2343	ANGEL1	angel homolog 1
ENSG00000174606	19.5485	23.7105	23.6785	29.0246	29.7696	29.3426	23.174	21.8074	19.6815	29.6466	31.2386	27.4767	18.0795	18.9178	22.9276	30.4966	28.6519	30.2246	ANGEL2	angel homolog 2
ENSG00000154188	9.72891	11.2662	12.1253	1.97313	2.09013	2.11074	8.78344	8.69495	6.45031	1.20663	1.34916	1.4031	4.13774	4.24199	4.31081	0.565296	0.428911	0.641644	ANGPT1	angiopoietin 1
ENSG00000167772	13.1096	12.6603	13.8201	18.0302	18.0586	19.6619	12.2403	12.304	13.6915	17.2395	18.2482	18.0875	22.1337	22.9144	20.3271	16.8938	16.5663	16.9987	ANGPTL4	angiopoietin like 4
ENSG00000130812	0.167507	0.23509	0.171178	0.455925	0.287596	0.30512	0.240267	0.185606	0.431311	0.559491	0.477035	0.420961	0.104761	0.065487	0.041689	0.443463	0.229534	0.25238	ANGPTL6	angiopoietin like 6
ENSG00000029534	3.58775	2.90799	3.16632	13.7699	14.6526	15.6507	3.78989	3.76193	5.2678	19.2626	20.2848	17.8972	4.23294	5.33913	5.57987	15.4612	17.012	17.1036	ANK1	ankyrin 1
ENSG00000145362	0.523236	0.07523	0.156046	0.086696	0.043062	0.035472	0.143663	0.280758	0.143835	0.137825	0.212397	0.076381	0.051775	0.090629	0.066007	0.111103	0.080458	0.214223	ANK2	ankyrin 2
ENSG00000151150	36.2457	36.0861	40.3661	73.69	67.7199	66.099	37.0865	38.728	31.9558	76.7132	73.2508	66.1858	42.4388	43.3698	48.3269	82.4594	78.1277	78.3932	ANK3	ankyrin 3
ENSG00000151687	1.6284	2.27884	2.52082	3.20255	2.61367	3.78507	2.85359	2.96678	1.62582	2.50542	1.92372	1.20308	1.35219	0.580227	1.15086	3.69773	2.32703	2.15924	ANKAR	ankyrin and armadillo repeat containing
ENSG00000166839	0.384503	0.570996	0.386768	0.102944	0.102523	0.250734	0.601445	0.429928	0.689952	0.230291	0.144492	0.190588	0.403744	0.583755	0.35496	0.189875	0.28565	0.163887	ANKDD1A	ankyrin repeat and death domain containing 1A
ENSG00000189045	0.039717	0	0.046185	0.264631	0.067508	0.113938	0.079871	0.049245	0	0.151335	0.186002	0.140036	0	0.033936	0	0.485063	0.129742	0.341775	ANKDD1B	ankyrin repeat and death domain containing 1B
ENSG00000132623	11.9828	12.3738	12.2991	11.3266	12.2584	11.3018	12.8359	12.9531	11.2393	12.2167	12.5853	10.8564	10.2496	12.3303	12.0817	10.6068	11.2696	11.1256	ANKEF1	ankyrin repeat and EF-hand domain containing 1
ENSG00000153930	10.1241	12.6003	13.3135	2.401	2.22326	2.73551	9.88218	10.1631	8.52909	2.09013	3.53782	1.83242	8.58624	10.0583	9.60662	2.0022	3.19468	2.2085	ANKFN1	ankyrin repeat and fibronectin type III domain containing 1
ENSG00000185722	14.2259	14.8589	15.9771	17.224	16.4924	17.232	15.1744	14.8885	13.6429	17.908	17.7684	14.9761	11.1194	12.788	14.0784	16.007	17.9258	16.5633	ANKFY1	ankyrin repeat and FYVE domain containing 1
ENSG00000154122	0.180588	0.048337	0.289894	0.027491	0.008607	0.015427	0.220166	0.035203	0.053214	0.092561	0.008763	0.08859	0.383836	0.297767	0.115504	0.04042	0.139972	0.732405	ANKH	ANKH inorganic pyrophosphate transport regulator
ENSG00000131503	70.1716	71.278	77.2037	58.7276	60	66.7508	81.7661	73.5473	64.7382	66.5948	71.3239	47.9639	43.7613	55.5506	68.2753	72.9074	79.9996	68.3197	ANKHD1	ankyrin repeat and KH domain containing 1
ENSG00000254996	16.5543	15.1204	18.3027	23.7268	20.8861	22.8915	16.7019	15.5761	16.0335	19.9692	22.6921	22.2829	17.7241	17.2657	17.5058	25.2007	25.4559	25.0241	ANKHD1-EIF4EBP3	ANKHD1-EIF4EBP3 readthrough
ENSG00000001629	15.7432	18.0267	18.6093	21.3486	19.0216	20.3429	18.0571	16.804	14.6653	23.7032	22.5825	18.5472	13.8145	15.6488	16.6307	22.7872	23.1055	22.3849	ANKIB1	ankyrin repeat and IBR domain containing 1
ENSG00000170209	0.284266	0.074194	0.058203	1.16747	1.1101	1.06359	0.189114	0.155244	0.246343	0.882076	0.963293	0.937248	0.025338	0.042385	0.086253	0.462786	0.565099	0.459048	ANKK1	ankyrin repeat and kinase domain containing 1
ENSG00000176915	46.2493	42.8691	48.0191	39.7134	40.7651	41.9904	45.1929	41.4447	43.2441	41.0685	40.7894	39.3922	35.5617	35.0816	41.1793	40.9149	43.2543	40.9117	ANKLE2	ankyrin repeat and LEM domain containing 2
ENSG00000144504	7.14886	4.94405	5.47737	6.91671	6.20974	5.93286	5.69048	5.93637	4.78994	7.56494	6.4929	6.1337	3.8466	3.47396	4.64835	5.48583	5.22902	7.33426	ANKMY1	ankyrin repeat and MYND domain containing 1
ENSG00000106524	12.0726	14.0889	12.9294	23.206	19.9444	22.1905	12.4706	12.1091	9.13122	19.7367	19.7008	20.9637	12.802	12.9674	12.962	22.337	20.5853	19.9469	ANKMY2	ankyrin repeat and MYND domain containing 2
ENSG00000164331	9.63326	14.2792	14.3968	19.0763	17.3596	18.7795	15.3544	14.1656	8.08652	17.9282	17.2861	16.186	11.9957	9.37257	10.1965	19.8735	19.9668	15.278	ANKRA2	ankyrin repeat family A member 2
ENSG00000148677	0.220378	0.208686	0.320759	0.787426	0.491316	0.81091	0.237034	0.351871	0.323252	1.08542	1.64132	1.62326	0.197396	0.313461	0.423231	0.968124	1.6235	0.968051	ANKRD1	ankyrin repeat domain 1
ENSG00000088448	34.1647	33.5359	32.748	44.1057	36.4595	38.4145	34.9052	25.0093	16.0398	47.2571	50.3782	35.8687	13.0226	13.8035	17.6001	42.0236	48.7998	40.8447	ANKRD10	ankyrin repeat domain 10
ENSG00000167522	40.8613	35.8113	38.4261	44.3464	45.7182	43.9984	40.7513	37.0835	40.6024	44.1063	45.5313	36.8679	26.2251	30.9754	35.6329	41.8459	47.8104	45.1824	ANKRD11	ankyrin repeat domain 11
ENSG00000101745	5.38807	6.91981	7.94279	9.90944	8.16075	8.11071	7.84051	6.77263	3.80054	12.4077	10.4001	7.6671	4.41019	5.78911	8.08605	12.1247	13.5757	10.7799	ANKRD12	ankyrin repeat domain 12
ENSG00000076513	22.2533	23.4144	24.496	43.9407	47.4242	50.3881	27.3292	26.1601	23.2643	54.6551	50.51	43.1518	22.9354	28.5906	32.4529	55.3788	60.244	53.2972	ANKRD13A	ankyrin repeat domain 13A
ENSG00000198720	7.88214	7.72045	8.38604	2.84423	2.0604	3.1372	9.16277	9.76303	9.855	2.93838	2.95365	2.95591	3.59208	4.34014	4.43565	2.87767	2.18722	2.40357	ANKRD13B	ankyrin repeat domain 13B
ENSG00000118454	12.2771	14.5213	15.9004	15.4043	16.2386	17.636	14.1711	13.4154	10.7278	16.0347	15.1153	13.9665	11.8783	12.5561	13.6773	17.2106	16.1275	17.5646	ANKRD13C	ankyrin repeat domain 13C
ENSG00000172932	33.5248	27.1357	26.0648	34.6709	36.6246	37.9639	29.2967	28.404	29.3998	29.0143	32.2215	31.1832	21.6864	17.035	21.2626	33.1649	33.4395	34.531	ANKRD13D	ankyrin repeat domain 13D
ENSG00000134461	12.1986	12.4466	11.7352	7.58292	8.19105	8.47131	13.3867	13.1247	12.8255	8.7938	9.41187	8.49883	11.9371	11.3418	10.77	9.16864	8.98482	8.62849	ANKRD16	ankyrin repeat domain 16
ENSG00000132466	18.8418	19.7919	22.2697	20.419	20.3238	23.2447	21.7006	20.2155	17.5153	26.6344	25.8873	15.7494	15.0936	16.6535	21.7244	23.8211	25.959	21.974	ANKRD17	ankyrin repeat domain 17
ENSG00000180071	6.33005	7.47506	4.65239	4.52531	5.19968	3.80531	6.86613	5.93977	4.09673	3.12291	3.76156	2.57146	2.0428	4.28887	4.07394	7.11173	3.90701	2.8944	ANKRD18A	ankyrin repeat domain 18A
ENSG00000230453	11.2402	11.1183	12.1819	3.84023	4.65879	3.1795	8.99572	8.76558	8.71699	3.26737	4.67403	2.48721	8.12204	7.37904	10.0747	3.09478	3.57256	3.57152	ANKRD18B	ankyrin repeat domain 18B
ENSG00000165887	2.11163	1.75387	1.91116	1.40749	1.74338	1.65095	1.58715	1.16746	1.3727	1.79391	1.2362	1.73422	3.69643	4.3348	3.62847	1.87439	2.19021	2.50116	ANKRD2	ankyrin repeat domain 2
ENSG00000215559	1.38958	0.971792	1.27918	0.489851	0.598067	0.391239	1.20707	0.559997	0.97131	0.519529	0.557029	0.292508	0.540169	0.982928	0.720772	0.628505	1.16811	0.61847	ANKRD20A11P	ankyrin repeat domain 20 family member A11, pseudogene
ENSG00000172014	0.566847	0.389225	0.442821	0.315641	0.32672	0.378595	0.36035	0.297391	0.363876	0.350238	0.342996	0.254668	0.164531	0.208086	0.295352	0	0.267863	0.287698	ANKRD20A4	ankyrin repeat domain 20 family member A4
ENSG00000229089	0.168995	0.141189	0.25041	0.213044	0.171758	0.13744	0.240042	0.156795	0.109258	0.12321	0.225468	0.031858	0.03564	0.159487	0.151198	0.23962	0.16331	0.197258	ANKRD20A8P	ankyrin repeat domain 20 family member A8, pseudogene
ENSG00000152766	12.2464	16.8089	13.7339	25.9194	26.1252	26.7644	13.1662	11.7848	10.554	26.7309	24.8991	24.6317	11.8312	10.7684	11.5986	29.1475	28.3726	28.2151	ANKRD22	ankyrin repeat domain 22
ENSG00000163126	1.3838	0.967662	1.26142	1.18198	1.71877	1.22792	1.0429	1.32531	1.37267	1.32826	1.81642	1.11747	0.464137	0.208096	0.936634	1.09708	2.19521	1.04205	ANKRD23	ankyrin repeat domain 23
ENSG00000089847	0.912413	0.511972	0.648444	2.23182	1.91022	2.13644	0.45161	0.649445	0.74937	2.09202	1.47587	1.50259	0.692529	0.770539	0.824508	1.07358	2.3842	2.04382	ANKRD24	ankyrin repeat domain 24
ENSG00000107890	5.99037	6.43507	6.35633	4.74326	4.01221	5.08689	6.02191	5.80858	4.03965	4.95241	5.32096	4.53003	4.57943	4.72985	5.64966	4.70712	4.5508	4.89207	ANKRD26	ankyrin repeat domain 26
ENSG00000105186	9.18802	10.0852	10.8962	12.5375	12.8988	12.0051	10.4216	9.94609	8.63588	11.9329	11.2902	10.0685	7.70891	8.44591	8.23133	13.2889	13.7046	13.0019	ANKRD27	ankyrin repeat domain 27
ENSG00000206560	16.0205	15.204	17.7542	15.3905	13.9628	15.3476	18.1698	15.6692	12.6497	18.0275	18.8408	14.0224	12.2371	12.3729	14.1685	19.1059	19.9604	15.8288	ANKRD28	ankyrin repeat domain 28
ENSG00000154065	1.38812	1.30702	1.76805	0.180502	0.340582	0.272962	1.80252	1.14252	1.26181	0.569316	0.255948	0.385885	0.866048	0.981871	0.99696	0.425587	0.04637	0.310977	ANKRD29	ankyrin repeat domain 29
ENSG00000180777	3.04375	4.16901	3.57284	3.88491	3.82775	4.15153	3.35437	2.65005	2.00605	3.77543	3.06445	2.91333	3.27867	3.61316	4.13089	4.63934	4.68351	4.40189	ANKRD30B	ankyrin repeat domain 30B
ENSG00000145700	0.125887	0.230064	0.207385	0.226797	0.161008	0.158099	0.120866	0.133353	0.082537	0.150589	0.110346	0.186883	0.169868	0.174865	0.218145	0.277672	0.207604	0.149103	ANKRD31	ankyrin repeat domain 31
ENSG00000272031	7.01803	7.14068	6.97342	10.937	11.8304	11.9642	7.7796	8.73849	8.96346	11.278	11.2568	9.67491	6.8673	7.86838	8.06901	12.3786	14.0956	12.5059	ANKRD34A	ankyrin repeat domain 34A
ENSG00000189127	3.07272	2.32637	3.95853	2.10987	2.36367	2.1912	3.48393	3.00984	2.97203	2.14319	2.27171	1.75826	0.99386	1.82636	1.95222	1.53682	1.30116	1.57265	ANKRD34B	ankyrin repeat domain 34B
ENSG00000198483	0.242879	0.313146	0.258169	0.187313	0.248357	0.227572	0.384831	0.431224	0.488059	0.243719	0.200931	0.219249	0.133187	0.179506	0.15956	0.317008	0.254752	0.262302	ANKRD35	ankyrin repeat domain 35
ENSG00000135976	2.46889	2.86899	2.23211	2.45912	1.57275	1.77347	3.18707	3.06545	1.64414	2.47173	2.8665	2.55838	1.85884	1.38943	1.12485	2.40409	2.06604	2.24379	ANKRD36	ankyrin repeat domain 36
ENSG00000196912	3.18471	1.78243	1.64416	2.45118	2.69685	2.26814	2.68782	2.38992	2.17136	2.20681	2.00567	0.950037	1.33183	0.821324	1.29756	2.27253	2.48345	2.37976	ANKRD36B	ankyrin repeat domain 36B
ENSG00000174501	3.24075	2.20323	2.19405	1.64457	1.89411	2.08985	2.18806	1.98029	2.19634	2.17673	2.96874	1.04483	0.58829	1.00144	1.36381	2.4034	3.51586	2.16946	ANKRD36C	ankyrin repeat domain 36C
ENSG00000186352	5.28951	6.49608	7.32653	9.14013	9.13233	9.99338	6.75871	7.41172	6.37284	9.61341	9.86986	9.21464	7.78995	5.86031	7.47467	7.54363	7.59882	7.35885	ANKRD37	ankyrin repeat domain 37
ENSG00000213337	11.6092	10.2006	9.77496	7.22375	7.72563	7.70342	10.9248	10.256	12.6215	6.53932	6.98955	6.72298	9.79404	9.11609	7.73188	7.63713	7.25148	6.83289	ANKRD39	ankyrin repeat domain 39
ENSG00000154945	28.8852	30.4683	32.0741	31.1586	31.4144	30.4255	30.6844	30.3063	27.2067	28.8942	28.6107	26.1193	25.154	26.9008	29.0552	32.5853	34.2899	32.5109	ANKRD40	ankyrin repeat domain 40
ENSG00000167117	0.144305	0.492266	0.105412	0.953724	0.745288	0.336991	0.907239	0.260675	0.551857	1.10468	0.429971	0.652802	0.777323	0.441762	0.176404	1.01991	0.309689	0.537055	ANKRD40CL	ANKRD40 C-terminal like
ENSG00000137494	15.1272	14.3166	13.9828	24.3434	23.1173	24.099	14.6657	12.8955	13.4091	21.2204	25.5279	20.4215	11.243	12.3204	12.2781	20.814	19.1891	20.5431	ANKRD42	ankyrin repeat domain 42
ENSG00000065413	2.15696	2.15766	3.82726	1.59095	2.06607	1.99698	3.13612	1.96653	2.16765	1.692	4.7302	1.80989	4.31558	1.69085	2.6063	2.74996	2.65303	2.14846	ANKRD44	ankyrin repeat domain 44
ENSG00000231621	0.198499	0.121222	0.59384	0.435066	0.208465	0	0.106352	0	0.211853	0	0.234587	0.138583	0	0	0.197991	0.142717	0	0	ANKRD44-AS1	ANKRD44 antisense RNA 1
ENSG00000186106	14.9512	15.4101	16.4131	20.4869	18.2239	17.2021	15.2406	14.2648	13.4856	16.1482	13.5702	15.0223	13.3552	14.1573	15.4753	19.2181	17.0396	18.2151	ANKRD46	ankyrin repeat domain 46
ENSG00000168876	19.8048	23.0711	21.8748	28.7316	26.5198	27.8134	19.1257	18.2409	13.9032	23.9527	23.3577	19.2782	17.5013	17.3391	16.6696	29.5013	25.8427	27.2239	ANKRD49	ankyrin repeat domain 49
ENSG00000151458	4.7822	5.39423	5.6546	10.0282	9.65037	9.6535	5.52722	5.08101	4.07704	11.4774	9.60726	8.46185	5.10901	6.02311	7.18897	11.5867	12.2962	11.1622	ANKRD50	ankyrin repeat domain 50
ENSG00000139645	25.2691	23.7803	24.7329	15.9423	17.6619	17.4895	24.2731	23.3756	23.6682	18.0374	19.5697	15.2615	15.4388	17.8284	20.681	15.7253	18.0431	16.6301	ANKRD52	ankyrin repeat domain 52
ENSG00000100124	27.3101	27.0527	29.4179	24.9181	27.0255	27.6135	26.8614	27.1612	27.1538	23.7045	24.4636	25.3738	23.5433	25.8169	24.4304	21.9976	21.0481	21.525	ANKRD54	ankyrin repeat domain 54
ENSG00000135299	6.36623	4.97842	3.88494	3.86471	4.48891	4.63992	4.50226	4.93614	3.34993	4.23738	5.44042	4.1085	3.17155	2.45058	3.72154	4.28677	4.24005	4.40222	ANKRD6	ankyrin repeat domain 6
ENSG00000157999	0.198437	0.162511	0.295404	0.072836	0.161721	0.186463	0.072796	0.13092	0.102007	0.095719	0.02631	0.029975	0.18791	0.252267	0.087858	0.218543	0.176243	0.107954	ANKRD61	ankyrin repeat domain 61
ENSG00000235098	0.323481	0.271718	0.389565	0.30972	0.339106	0.354111	0.411198	0.209177	0.36304	0.201714	0.248346	0.172202	0.432379	0.39506	0.336716	0.315434	0.096362	0.160092	ANKRD65	ankyrin repeat domain 65
ENSG00000230062	0.869106	1.38002	0.664363	0.931205	1.33656	1.52218	0.566669	0.826595	0.783406	0.595846	0.763965	0.974639	0.133259	0.307055	0.397383	0.282852	0.123515	0.159576	ANKRD66	ankyrin repeat domain 66
ENSG00000156381	32.3594	32.8944	35.7414	31.2893	36.4834	38.4139	31.1677	39.9956	39.4673	38.3197	36.7044	39.2854	35.512	33.217	41.784	33.0052	40.4882	45.4552	ANKRD9	ankyrin repeat domain 9
ENSG00000064999	9.71137	9.3054	9.62278	11.743	11.6761	11.309	10.2743	9.81406	9.99847	11.8658	12.4149	10.6449	6.76049	8.11182	8.78815	10.5954	11.8816	11.3587	ANKS1A	ankyrin repeat and sterile alpha motif domain containing 1A
ENSG00000185046	3.29952	4.8398	5.31783	4.925	4.44633	4.028	4.44969	3.63894	3.7987	4.81088	3.80772	2.65372	3.03196	3.17265	3.41233	5.24237	4.00201	5.47707	ANKS1B	ankyrin repeat and sterile alpha motif domain containing 1B
ENSG00000168096	10.9421	9.49607	10.125	11.6343	11.0036	11.0162	9.89578	9.75332	9.46314	10.0939	11.3242	10.3971	7.90185	6.60485	6.54746	11.2985	11.2995	11.9477	ANKS3	ankyrin repeat and sterile alpha motif domain containing 3
ENSG00000163516	10.3347	9.43447	9.44618	16.1048	16.6783	15.8598	10.9748	8.80091	9.00679	13.8792	15.9219	13.1417	8.32515	6.96301	8.57924	15.0457	16.6918	15.4073	ANKZF1	ankyrin repeat and zinc finger peptidyl tRNA hydrolase 1
ENSG00000011426	104.133	116.057	121.757	77.093	74.999	81.731	108.579	115.001	92.9103	82.9031	88.493	78.862	86.3549	99.2211	105.547	85.4179	88.0023	82.1908	ANLN	anillin actin binding protein
ENSG00000131620	21.1434	22.3976	23.5197	11.9614	15.0013	17.4704	15.5682	14.7343	16.0908	7.91891	7.01227	6.88055	10.2999	13.6553	17.339	7.53131	8.5658	7.21177	ANO1	anoctamin 1
ENSG00000160746	61.4737	64.3155	64.711	96.681	95.2871	100.046	63.5708	58.9988	50.0967	86.4668	83.0456	77.2097	61.9859	76.7006	75.8984	93.3762	94.3274	92.7751	ANO10	anoctamin 10
ENSG00000047617	1.10536	1.07567	0.751292	1.8082	2.73034	2.02941	0.971281	1.28492	1.13704	2.10776	3.30841	2.13233	1.61493	1.09982	1.42867	1.64385	1.45498	2.39204	ANO2	anoctamin 2
ENSG00000134343	0.234648	0.227979	0.202414	0.44914	0.512621	0.618083	0.28651	0.273148	0.214672	0.440486	0.571963	0.399951	0.332926	0.073969	0.184466	0.320818	0.690816	0.929542	ANO3	anoctamin 3
ENSG00000171714	3.73601	4.39267	4.50567	7.33992	7.24894	7.98919	4.21693	4.08185	2.84878	7.08518	7.14493	6.29126	4.16707	4.62867	5.28873	8.93645	9.55379	9.29672	ANO5	anoctamin 5
ENSG00000177119	28.9418	33.2316	34.6162	59.2633	57.6571	58.9203	32.7423	31.9389	24.8958	65.5039	65.9956	51.6485	35.396	42.9596	45.4149	76.2622	84.8512	68.7709	ANO6	anoctamin 6
ENSG00000146205	1.48428	0.900438	0.965961	0.383074	0.599791	0.508633	0.732719	0.922431	0.67999	0.397753	0.43015	0.488488	0.937878	0.760346	0.652672	0.337368	0.289667	0.348298	ANO7	anoctamin 7
ENSG00000074855	5.55083	4.66247	4.37723	5.34917	5.55795	5.84122	4.84272	4.19588	4.48135	4.62369	4.68447	3.7026	2.72497	3.02367	3.41563	4.59195	5.24769	4.76047	ANO8	anoctamin 8
ENSG00000185101	4.60648	3.35709	2.75791	3.51331	3.35472	3.65668	1.91753	2.00174	1.81922	1.45425	1.32549	1.46832	2.46333	1.54261	2.15529	3.72028	3.5365	3.66694	ANO9	anoctamin 9
ENSG00000011201	0.040265	0.068539	0.040605	0.41936	0.433775	0.131336	0.122524	0.159199	0.063398	0.33472	0.176618	0.379763	0.084047	0.193759	0.057633	0.320939	0.135949	0.542355	ANOS1	anosmin 1
ENSG00000140350	182.49	192.965	213.516	125.316	115.08	116.164	205.118	200.698	211.565	124.657	116.665	126.397	185.492	193.355	181.452	116.751	108.679	120.71	ANP32A	acidic nuclear phosphoprotein 32 family member A
ENSG00000259516	0.217163	0.154085	0.076284	0	0.103507	0.165264	0.13812	0.347415	0.139801	0.145553	0.059518	0	0.133733	0.249341	0.218308	0.143136	0.254443	0.038191	ANP32AP1	acidic nuclear phosphoprotein 32 family member A pseudogene 1
ENSG00000136938	161.405	166.783	169.981	111.539	115.497	114.129	168.219	162.714	151.389	115.097	108.202	125.153	171.678	167.893	160.625	111.273	108.396	115.155	ANP32B	acidic nuclear phosphoprotein 32 family member B
ENSG00000143401	66.0098	76.1328	78.387	41.9209	42.0425	45.2639	73.962	72.5018	46.4891	46.4111	48.9158	41.4068	61.343	61.1571	63.9534	48.0323	47.8736	49.0458	ANP32E	acidic nuclear phosphoprotein 32 family member E
ENSG00000103254	42.0688	37.1234	39.3614	43.4831	47.3253	43.1617	36.6786	39.3748	46.5772	34.9546	41.4496	45.7797	45.9228	43.6844	38.7604	46.2302	45.4962	43.3439	ANTKMT	adenine nucleotide translocase lysine methyltransferase
ENSG00000169604	5.96628	5.25712	6.98245	2.75957	2.29547	2.64801	8.93219	8.25875	7.33945	6.13579	5.645	4.58366	5.39736	6.23339	6.66577	3.69456	4.21242	4.73053	ANTXR1	ANTXR cell adhesion molecule 1
ENSG00000163297	0.488158	1.02951	0.979133	2.94213	2.3806	3.1445	0.742578	0.921084	0.38519	3.03115	2.92808	2.19531	1.36072	1.12241	1.04918	3.87474	5.10597	4.64236	ANTXR2	ANTXR cell adhesion molecule 2
ENSG00000135046	9.87311	12.8839	12.7452	8.43151	8.60317	9.17429	9.93228	9.33385	8.22678	13.438	13.8675	14.0828	5.08736	5.85011	6.02898	12.5498	17.1068	20.3639	ANXA1	annexin A1
ENSG00000122359	89.1222	79.9478	93.5647	145.315	149.284	148.141	80.6713	86.9674	92.6746	121.344	121.989	135.844	111.22	104.404	91.9498	113.924	130.903	130.378	ANXA11	annexin A11
ENSG00000182718	1077.69	1137.04	1076.15	1877.15	1980.3	1877.21	961.21	932.944	944.604	1687.51	1711.04	1778.78	1163.67	1238.05	1137.24	1952.51	1946.56	1804.45	ANXA2	annexin A2
ENSG00000177721	0.521473	0.253796	0.334055	0.433816	0.685812	0.415657	0.526919	0.257422	0.45662	0.4529	0.470832	0.493528	0.392385	0.327091	0.340026	0.480324	0.608819	0.576729	ANXA2R	annexin A2 receptor
ENSG00000138772	20.9229	23.8353	21.1694	125.225	120.684	121.845	21.0843	20.9369	16.9884	128.584	122.828	121.718	51.0865	51.7495	47.2106	176.007	171.267	154.785	ANXA3	annexin A3
ENSG00000196975	46.3196	51.0833	49.1229	68.1312	70.1099	70.0043	48.8257	48.5705	52.7526	67.845	64.9158	65.0189	45.6709	45.9365	45.6782	66.0884	67.5311	70.1457	ANXA4	annexin A4
ENSG00000164111	259.818	271.604	279.017	439.871	431.365	439.32	253.956	257.593	246.149	359.351	350.993	360.86	265.839	277.605	271.563	406.848	366.564	381.864	ANXA5	annexin A5
ENSG00000197043	530.477	512.415	546.151	1174.9	1206.83	1184.45	452.512	443.032	495.663	989.93	984.183	928.976	700.804	763.274	716.859	1150.47	1221.92	1167.11	ANXA6	annexin A6
ENSG00000138279	192.493	204.688	200.371	221.256	212.711	217.397	210.897	200.977	202.791	212.367	204.759	185.344	167.96	172.245	162.062	221.853	224.51	213.928	ANXA7	annexin A7
ENSG00000143412	113.255	113.465	124.526	173.292	170.103	158.222	101.371	104.242	117.724	141.342	127.719	133.937	101.657	106.033	102.959	109.253	112.205	124.867	ANXA9	annexin A9
ENSG00000002726	0.698124	0.384572	0.456361	0.05607	0.121811	0.080684	0.282155	0.275046	0.2169	0.107579	0.060035	0.05072	0.119245	0.162034	0.129823	0.105318	0.059908	0.045075	AOC1	amine oxidase copper containing 1
ENSG00000131480	0.294427	0.267957	0.316077	0.2741	0.111842	0.140355	0.576008	0.519373	0.447324	0.2617	0.472197	0.487811	0.240604	0.210283	0.176545	0.269673	0.254502	0.307684	AOC2	amine oxidase copper containing 2
ENSG00000131471	0.084299	0.171062	0.083253	0.043365	0.033311	0.071612	0.143406	0.512781	0.104882	0.087912	0.149637	0.088865	0.027157	0.006717	0.055315	0.084058	0.061526	0.227531	AOC3	amine oxidase copper containing 3
ENSG00000148120	64.5224	69.1696	66.788	106.588	115.326	106.198	63.8933	62.3541	71.2138	104.496	97.6874	104.319	78.1145	77.0306	79.6614	106.407	114.734	112.041	AOPEP	aminopeptidase O (putative)
ENSG00000138660	13.9121	15.9014	18.4196	23.9393	20.6799	22.6864	18.1049	15.7367	10.8344	26.6005	23.1054	22.9977	15.8163	14.5947	15.9086	30.65	26.2709	30.6196	AP1AR	adaptor related protein complex 1 associated regulatory protein
ENSG00000100280	56.2835	54.5902	58.0265	52.0694	54.9466	57.1781	55.0497	58.4	61.2736	54.0021	56.1479	54.2573	53.5887	56.3375	60.2237	51.8331	58.1676	53.9945	AP1B1	adaptor related protein complex 1 subunit beta 1
ENSG00000166747	59.2967	64.4503	66.0214	76.0881	75.0672	76.545	61.0343	63.2648	62.1599	80.2485	80.7733	69.1988	47.5868	60.8163	72.665	75.1948	80.7388	78.8166	AP1G1	adaptor related protein complex 1 subunit gamma 1
ENSG00000213983	40.2547	33.6192	33.7544	57.5505	59.6444	61.8131	38.977	36.7458	33.4653	50.8687	63.8006	49.7243	26.2971	23.2522	27.2824	52.0178	58.2839	56.5687	AP1G2	adaptor related protein complex 1 subunit gamma 2
ENSG00000072958	31.0581	28.3373	33.1113	25.0986	25.6561	29.2027	33.1572	35.3934	39.1137	25.9038	25.1405	25.1571	29.4241	28.5686	31.2362	23.0909	25.7977	24.9118	AP1M1	adaptor related protein complex 1 subunit mu 1
ENSG00000129354	131.114	120.185	126.91	129.389	139.548	138.71	118.205	120.448	136.554	123.709	124.599	126.46	117.482	120.792	118.998	118.137	115.309	112.153	AP1M2	adaptor related protein complex 1 subunit mu 2
ENSG00000106367	112.684	125.628	119.775	105.822	107.654	111.111	112.621	110.103	125.433	96.6655	102.746	102.537	106.57	102.696	96.539	97.7367	102.043	98.2381	AP1S1	adaptor related protein complex 1 subunit sigma 1
ENSG00000182287	53.443	77.5224	72.2215	32.2448	25.1066	26.7753	65.7397	64.2598	31.5982	26.6356	25.2953	21.3232	68.9318	67.6893	67.7758	31.9401	30.2969	29.2	AP1S2	adaptor related protein complex 1 subunit sigma 2
ENSG00000152056	5.1422	5.64703	5.36306	7.69117	8.35801	6.46662	5.87173	5.98238	3.6973	7.82914	7.6752	6.54748	4.22188	4.46783	4.95077	7.71807	7.64846	6.68749	AP1S3	adaptor related protein complex 1 subunit sigma 3
ENSG00000196961	57.8709	54.9566	59.7288	53.7451	58.4477	59.8645	54.9352	54.9431	62.0595	50.5909	53.9794	51.439	53.1149	56.6457	56.8994	49.6296	57.3389	53.4544	AP2A1	adaptor related protein complex 2 subunit alpha 1
ENSG00000183020	20.2871	16.8259	20.5499	20.4802	22.3702	20.6142	18.7314	16.457	18.7341	22.7771	19.8417	18.9616	15.6012	14.9737	18.155	23.6292	23.7621	21.7713	AP2A2	adaptor related protein complex 2 subunit alpha 2
ENSG00000006125	183.425	191.735	202.825	185.403	179.581	189.492	195.848	199.602	178.942	207.081	199.959	161.272	137.468	172.567	188.02	177.857	189.684	170.773	AP2B1	adaptor related protein complex 2 subunit beta 1
ENSG00000161203	619.904	611.818	640.252	639.48	653.44	669.613	626.274	633.043	659.043	617.8	650.403	617.83	607.155	634.299	641.776	582.628	596.4	558.756	AP2M1	adaptor related protein complex 2 subunit mu 1
ENSG00000042753	367.459	370.387	356.288	270.898	294.462	278.412	352.972	368.908	395.988	263.245	284.662	322.96	409.995	369.296	342.332	253.325	254.527	253.08	AP2S1	adaptor related protein complex 2 subunit sigma 1
ENSG00000132842	35.6415	40.127	41.7035	45.6538	44.37	46.3162	40.491	40.653	36.1158	45.9373	44.8584	39.7247	35.0387	37.9851	41.418	44.7373	46.362	42.3399	AP3B1	adaptor related protein complex 3 subunit beta 1
ENSG00000103723	0.733105	0.065154	0.165006	0.353728	0.138963	0.444369	0.31063	0.194345	0.470009	0.074839	0.843937	0.027967	0.498757	0.042127	0.451088	0.426282	0.049396	0.484236	AP3B2	adaptor related protein complex 3 subunit beta 2
ENSG00000065000	54.2265	50.9906	55.6968	71.1315	77.8083	74.4426	56.5445	52.1804	60.4005	69.0012	72.0054	69.2478	51.1603	51.9712	51.6765	71.3321	76.569	73.9343	AP3D1	adaptor related protein complex 3 subunit delta 1
ENSG00000185009	71.3142	86.8473	88.9786	92.4536	92.2897	94.2606	79.0348	78.0136	62.3375	90.0698	89.2827	70.9916	61.4553	79.3913	81.2031	92.7731	99.1544	90.1959	AP3M1	adaptor related protein complex 3 subunit mu 1
ENSG00000070718	18.2282	19.4715	20.8802	17.0496	18.0437	16.4802	17.7888	18.218	16.0226	15.3381	15.7815	12.5744	12.7308	13.5158	13.9502	18.8184	15.5628	16.3077	AP3M2	adaptor related protein complex 3 subunit mu 2
ENSG00000177879	70.5896	101.561	97.4648	130.064	111.245	114.745	90.5652	93.6983	62.4182	113.053	106.756	98.1738	77.3266	87.2173	83.7957	122.116	114.262	120.033	AP3S1	adaptor related protein complex 3 subunit sigma 1
ENSG00000157823	38.5202	40.1743	37.9401	26.2235	28.0356	30.013	36.0698	41.2682	35.3557	29.2851	29.6038	24.1018	34.4265	36.5395	36.0789	26.2343	35.7811	29.7207	AP3S2	adaptor related protein complex 3 subunit sigma 2
ENSG00000134262	9.27134	8.03343	8.83066	8.43402	7.24966	7.92692	8.41348	8.01093	7.65567	7.80568	8.51341	7.01374	5.71882	5.44428	5.64831	6.30003	6.95073	6.7224	AP4B1	adaptor related protein complex 4 subunit beta 1
ENSG00000081014	6.34936	7.49106	8.01011	7.92168	7.08487	7.37887	7.93059	7.52991	5.46022	7.54606	7.67121	6.19102	5.25897	6.15839	7.12979	8.27265	8.80446	7.5997	AP4E1	adaptor related protein complex 4 subunit epsilon 1
ENSG00000221838	20.2831	23.0804	19.2449	18.4541	21.0525	23.089	19.6894	18.4955	22.5436	20.2885	17.7104	18.8663	14.481	13.8153	17.5085	18.6685	17.6277	15.3745	AP4M1	adaptor related protein complex 4 subunit mu 1
ENSG00000100478	9.59368	11.2085	11.2864	13.5298	12.7615	10.576	9.40531	9.25466	4.58538	11.9379	11.2863	10.4144	9.46564	10.2431	9.78683	11.7498	10.7601	10.2139	AP4S1	adaptor related protein complex 4 subunit sigma 1
ENSG00000254470	4.70233	4.73632	5.20857	6.41631	6.88202	6.60533	4.47633	4.7638	5.58024	7.27231	6.67312	6.72241	4.33597	4.75362	4.98929	7.87736	8.22302	8.05923	AP5B1	adaptor related protein complex 5 subunit beta 1
ENSG00000053770	33.6085	42.2425	42.2996	67.4272	58.9553	57.1301	43.9129	45.5793	29.346	71.1616	68.6325	62.8429	39.0041	36.6846	43.555	73.5086	70.9802	69.9232	AP5M1	adaptor related protein complex 5 subunit mu 1
ENSG00000125843	10.1078	8.57074	11.8905	12.4367	13.3494	12.4784	10.8563	10.1297	12.9035	13.9064	12.67	12.0394	9.61528	10.3099	9.75441	12.2182	13.5152	13.6038	AP5S1	adaptor related protein complex 5 subunit sigma 1
ENSG00000242802	26.7684	21.8404	23.1463	42.6279	40.4943	40.9137	24.7669	23.3995	25.9765	38.6312	38.8049	43.4856	22.8238	23.1731	22.3155	42.874	48.285	47.6273	AP5Z1	adaptor related protein complex 5 subunit zeta 1
ENSG00000120868	9.00698	9.98684	11.7419	11.8209	10.9426	9.02607	11.1463	9.44678	7.55908	11.316	10.012	10.8286	9.73733	7.64856	10.0755	14.2232	12.5874	12.3658	APAF1	apoptotic peptidase activating factor 1
ENSG00000011132	7.98935	7.00845	6.56325	8.13694	9.17453	8.77041	7.71251	6.86032	7.06136	8.9778	6.20836	7.63554	6.00877	5.26304	6.27963	8.48174	8.85493	7.53828	APBA3	amyloid beta precursor protein binding family A member 3
ENSG00000166313	4.29959	4.91008	4.44203	1.88844	2.67537	2.23038	4.75016	4.86974	4.59775	2.13834	2.6967	2.68805	5.07989	5.52353	4.78728	2.38642	3.24934	2.90651	APBB1	amyloid beta precursor protein binding family B member 1
ENSG00000163697	23.8642	23.9698	26.1498	15.6895	17.0663	17.6461	15.6267	12.5377	11.2378	9.84271	12.3887	9.73584	6.18065	8.11115	11.3751	10.4361	12.6964	10.4701	APBB2	amyloid beta precursor protein binding family B member 2
ENSG00000113108	15.4216	12.2408	11.1936	19.9916	21.8269	23.1906	15.1991	11.4436	10.5764	17.0528	19.1262	15.3988	8.62451	8.517	10.5103	17.2559	20.5612	18.4844	APBB3	amyloid beta precursor protein binding family B member 3
ENSG00000134982	10.0991	8.7566	12.2785	12.7617	13.9503	13.2546	11.1786	11.6892	10.5818	16.7399	14.7611	9.73119	6.36413	11.4305	13.5862	18.0575	16.8694	15.5926	APC	APC regulator of WNT signaling pathway
ENSG00000115266	0.234534	0.145813	0.210525	0.976619	0.446485	0.400635	0.16951	0.356371	0.259463	0.327783	0.334089	0.545715	0.247765	0.182479	0.241018	1.35005	0.388506	0.39701	APC2	APC regulator of WNT signaling pathway 2
ENSG00000164062	157.468	150.904	151.724	97.6086	109.98	113.168	164.68	158.982	189.701	104.736	109.269	100.738	136.521	138.002	142.098	96.4028	109.083	103.027	APEH	acylaminoacyl-peptide hydrolase
ENSG00000100823	141.878	147.714	143.405	129.232	130.432	131.248	149.03	147.694	158.183	123.47	132.542	141.475	143.762	136.694	132.179	123.129	127.131	125.92	APEX1	apurinic/apyrimidinic endodeoxyribonuclease 1
ENSG00000169188	34.1258	33.929	34.2638	25.3869	29.8278	29.4768	36.3414	35.1664	43.4598	29.6459	28.0898	28.4079	28.4051	28.5421	28.338	25.9705	28.3149	25.4405	APEX2	apurinic/apyrimidinic endodeoxyribonuclease 2
ENSG00000117362	225.168	224.863	221.46	230.563	251.749	255.357	232.249	243.157	247.058	251.494	253.653	260.063	228.328	220.011	216.082	237.191	263.719	246.526	APH1A	aph-1 homolog A, gamma-secretase subunit
ENSG00000138613	17.9605	17.3488	16.6596	14.9814	15.8413	17.0328	16.7958	16.2504	16.0087	16.8454	15.0781	15.0061	11.8401	14.0321	13.0814	16.3309	17.2739	16.414	APH1B	aph-1 homolog B, gamma-secretase subunit
ENSG00000166181	104.015	124.834	128.718	118.444	117.783	128.197	111.844	109.414	92.3181	117.321	117.591	100.645	94.5792	106.083	111.831	128.459	143.685	123.056	API5	apoptosis inhibitor 5
ENSG00000149089	34.7177	39.3543	38.9284	43.1492	36.0976	37.746	38.2232	36.2537	29.2088	38.6355	36.8113	36.8085	35.313	33.9315	32.3676	40.6682	40.1567	38.3846	APIP	APAF1 interacting protein
ENSG00000171388	0.248885	0.21641	0.268337	0.139253	0.075523	0.187937	0.161526	0.104987	0.220788	0.082923	0.103067	0.093965	0.082373	0.111416	0.080383	0.138653	0.030924	0.01195	APLN	apelin
ENSG00000105290	26.0269	24.7423	27.6191	10.8445	9.3264	9.70967	25.5355	25.8798	28.7439	8.85975	9.76945	9.67057	25.5759	24.3591	24.3752	9.6297	10.6587	11.2012	APLP1	amyloid beta precursor like protein 1
ENSG00000084234	664.158	687.982	723.138	979.094	1026.52	1040.82	658.041	658.612	643.518	943.383	965.163	908.853	670.469	698.541	743.706	951.197	1046.94	949.632	APLP2	amyloid beta precursor like protein 2
ENSG00000101474	105.431	107.189	115.034	158.186	166.579	167.898	107.045	112.127	117.185	164.72	165.794	171.386	99.2363	100.821	99.004	148.671	156.675	154.38	APMAP	adipocyte plasma membrane associated protein
ENSG00000179750	42.9348	39.1984	44.5137	18.4308	18.3448	18.6718	39.7565	41.4839	44.1251	18.0337	21.0776	20.2129	44.6603	41.8286	37.619	21.6762	21.4501	20.4019	APOBEC3B	apolipoprotein B mRNA editing enzyme catalytic subunit 3B
ENSG00000128394	8.48367	8.94934	7.27661	7.2392	7.52121	7.47525	9.26341	7.90046	10.6272	7.38872	7.27436	8.26627	7.84496	7.89085	7.67856	6.85796	6.03452	6.86631	APOBEC3F	apolipoprotein B mRNA editing enzyme catalytic subunit 3F
ENSG00000239713	0.328505	0.500344	0.491582	0.578506	0.787155	0.757452	0.405873	0.400776	0.586938	0.732446	0.786342	1.18612	0.460201	0.184484	0.223661	0.732655	0.76074	0.543587	APOBEC3G	apolipoprotein B mRNA editing enzyme catalytic subunit 3G
ENSG00000173627	0.730622	0.545091	0.504747	1.09829	1.10539	1.46061	0.267189	0.428406	0.813086	0.678779	1.4777	0.834446	0.164115	0.198204	0.323196	0.787907	0.349277	0.069297	APOBEC4	apolipoprotein B mRNA editing enzyme catalytic polypeptide like 4
ENSG00000184730	2.00066	1.39453	1.67015	5.69339	6.04662	6.01074	2.06295	1.70277	2.14907	7.07129	7.12913	7.2538	3.81841	3.67994	3.73638	9.01758	9.3151	9.9694	APOBR	apolipoprotein B receptor
ENSG00000130208	1.87811	2.43755	2.59544	0.317792	0.498776	0.346426	2.90191	2.98422	5.88183	1.66658	0.712701	0.906497	1.75105	1.52077	2.84604	0.547252	0.437336	1.87882	APOC1	apolipoprotein C1
ENSG00000189058	45.6355	45.9864	49.4631	172.198	155.246	158.027	39.3815	40.2349	36.2161	112.996	116.729	124.678	19.9508	17.557	15.8453	54.0675	48.1824	53.2157	APOD	apolipoprotein D
ENSG00000130203	261.593	263.36	284.095	666.177	687.502	700.186	310.074	319.084	335.383	948.125	949.831	1052.9	533.795	499.733	453.177	1051.94	1043.86	1095.25	APOE	apolipoprotein E
ENSG00000100342	0.331791	0.332939	0.605347	1.85471	2.11953	2.27525	0.525382	0.720182	0.862606	3.06884	3.03362	3.62171	0.44414	0.367853	0.702012	1.67262	1.6704	2.13738	APOL1	apolipoprotein L1
ENSG00000128335	8.03842	7.92657	10.0713	10.8959	11.2327	10.6565	8.47758	9.3584	8.29202	11.3795	11.5197	10.189	7.30314	7.34269	8.02311	12.6312	9.72035	11.6809	APOL2	apolipoprotein L2
ENSG00000128284	0.098943	0.234853	0.181376	0.216372	0.168956	0.289829	0.439541	0.196882	0.258006	0.102799	0.266375	0.411157	0.087958	0.050312	0	0.215219	0.402971	0.063525	APOL3	apolipoprotein L3
ENSG00000221963	0.361087	0.459408	0.482172	2.60603	2.43948	2.54155	0.731194	0.574171	0.698508	3.43592	2.94057	2.72379	0.652887	0.783899	0.825751	3.36432	3.17314	3.40076	APOL6	apolipoprotein L6
ENSG00000178878	0.280091	0.414573	0.293935	0.261102	0.266568	0.313824	0.512947	0.256764	0.318766	0.305109	0.437496	0.501063	0.234217	0.289208	0.327948	0.222645	0.296931	0.307478	APOLD1	apolipoprotein L domain containing 1
ENSG00000204444	7.64076	9.63843	7.31514	6.18314	6.65863	7.42952	6.78274	7.73304	6.88179	6.66832	6.66055	5.41188	7.55833	6.30617	5.81318	5.76857	7.03147	5.50659	APOM	apolipoprotein M
ENSG00000184831	60.4849	74.1665	70.944	62.3441	60.4119	63.597	62.9641	68.8534	48.8601	56.2468	57.0077	57.2549	64.7992	62.5992	61.2584	55.6285	56.1813	58.0258	APOO	apolipoprotein O
ENSG00000155008	5.97085	7.1443	8.21344	10.2845	8.97917	10.0009	7.42489	7.39536	5.60954	10.907	10.4616	8.59486	7.66288	8.03834	8.62973	9.78737	10.1759	9.88732	APOOL	apolipoprotein O like
ENSG00000142192	769.905	809.15	851.714	1398.06	1407.84	1408.13	709.889	700.988	691.908	1213.52	1224.64	1152.57	781.172	839.903	872.849	1340.61	1380.14	1387.02	APP	amyloid beta precursor protein
ENSG00000062725	36.7222	39.4443	41.5681	43.1973	46.2974	44.1533	35.4744	41.327	31.7155	51.5455	42.1953	38.9038	28.5559	39.8948	41.6054	47.4918	52.7495	49.2242	APPBP2	amyloid beta precursor protein binding protein 2
ENSG00000157500	15.2038	17.9783	19.1283	16.7199	15.158	14.7066	18.1706	17.4202	14.9491	16.4807	16.0158	13.8467	13.698	15.9736	16.5726	18.0504	16.4085	15.4569	APPL1	adaptor protein, phosphotyrosine interacting with PH domain and leucine zipper 1
ENSG00000136044	23.9938	26.2449	24.2739	30.6495	30.4106	33.5442	30.273	24.9953	21.6652	31.4538	38.2566	32.2741	22.3656	21.5165	23.8245	37.4264	38.0469	32.9168	APPL2	adaptor protein, phosphotyrosine interacting with PH domain and leucine zipper 2
ENSG00000198931	610.377	562.705	563.42	361.102	370.249	364.421	559.594	581.628	707.522	359.857	363.38	406.569	572.434	554.62	478.103	321.883	328.59	330.886	APRT	adenine phosphoribosyltransferase
ENSG00000214293	16.0773	15.5364	15.0179	20.7406	20.7621	20.1535	15.5707	12.1803	15.4586	17.3269	17.5228	16.9205	13.8659	12.9045	14.8799	18.114	18.8337	17.2991	APTR	Alu-mediated CDKN1A/p21 transcriptional regulator
ENSG00000137074	34.6512	35.8054	40.2209	29.9572	29.8881	31.3548	38.6101	35.2503	38.7592	29.7783	33.899	31.9768	35.1772	32.5198	32.1214	30.3629	32.7988	32.3156	APTX	aprataxin
ENSG00000240583	0.468068	0.274603	0.895591	0.30714	0.664824	0.406676	0.315428	0.233618	0.578032	0.369618	0.296585	0.28037	0.272585	0.195688	0.306658	0.885486	0.134844	0.469469	AQP1	aquaporin 1 (Colton blood group)
ENSG00000178301	2.13827	2.43884	2.08002	2.21986	1.8807	1.66786	2.04947	2.49713	2.52915	2.18856	2.00699	1.98414	2.23329	2.19936	2.44241	2.5871	1.93646	2.3182	AQP11	aquaporin 11
ENSG00000165272	1.71038	1.125	1.45316	10.231	10.1188	10.2928	2.82334	2.17381	3.29855	7.27955	6.88519	8.10185	1.13097	1.1	1.19791	4.9556	4.27006	5.45418	AQP3	aquaporin 3 (Gill blood group)
ENSG00000260372	0.879508	0.278193	0.849284	0.039502	0.274893	0.114438	0.266524	0.490173	0.502315	0	0.109385	0.074273	0.190845	0.096442	0.159974	0.059819	0.035429	0.15903	AQP4-AS1	AQP4 antisense RNA 1
ENSG00000161798	0.285187	0.087621	0.25317	0.760847	0.848441	0.995673	0.263307	0.093217	0.267143	0.40317	0.473742	0.573256	0.122625	0.041235	0.024057	0.325511	0.184535	0.17243	AQP5	aquaporin 5
ENSG00000021776	21.6021	21.8539	24.1879	25.3227	21.7547	22.128	23.2317	23.2252	18.7497	24.5732	23.7208	21.1913	22.259	19.845	22.4722	26.9002	24.0608	22.5246	AQR	aquarius intron-binding spliceosomal factor
ENSG00000169083	8.86205	9.12936	9.96846	9.94526	9.20741	10.6867	9.47492	10.3563	8.7461	11.5877	10.4126	8.00285	5.40252	6.65146	8.99389	8.62382	8.74551	8.29824	AR	androgen receptor
ENSG00000078061	63.4158	58.6369	60.9365	77.9551	83.3268	83.1326	57.9166	60.5557	64.5292	72.3551	73.8889	73.848	60.774	62.6516	61.0936	69.958	74.6423	73.9904	ARAF	A-Raf proto-oncogene, serine/threonine kinase
ENSG00000186635	24.6967	18.1405	18.5337	19.7079	20.4492	20.9391	20.617	20.843	26.3752	24.2071	26.3263	24.0794	17.0562	16.6711	14.9461	20.2907	26.1861	26.2789	ARAP1	ArfGAP with RhoGAP domain, ankyrin repeat and PH domain 1
ENSG00000047365	4.76573	5.38216	5.32336	11.3714	10.936	10.9302	7.46077	6.12345	4.30086	12.3782	12.5414	9.90307	4.51711	5.39355	6.44094	13.3195	12.8342	12.9811	ARAP2	ArfGAP with RhoGAP domain, ankyrin repeat and PH domain 2
ENSG00000120318	0.237939	0.284535	0.375075	0.086697	0.119949	0.066879	0.204768	0.312224	0.281401	0.068712	0.121885	0.074882	0.184573	0.165089	0.159047	0.141014	0.106346	0.144181	ARAP3	ArfGAP with RhoGAP domain, ankyrin repeat and PH domain 3
ENSG00000198576	0.781919	0.962297	0.829602	1.67581	2.27762	1.97087	0.504439	0.483558	0.708384	1.09515	0.780383	0.789621	0.576271	0.825845	0.845392	0.834474	0.776982	0.792974	ARC	activity regulated cytoskeleton associated protein
ENSG00000095139	132.775	153.673	163.275	160.078	151.393	162.607	151.389	152.49	115.53	161.782	159.701	136.361	121.995	140.656	147.002	159.513	161.557	152.722	ARCN1	archain 1
ENSG00000109321	104.989	120.751	110.035	10.2502	9.4219	9.87888	129.828	122.716	94.2046	10.7949	10.7771	12.2363	47.4204	40.7988	44.9199	9.46446	9.8627	10.1484	AREG	amphiregulin
ENSG00000119682	22.772	22.8094	24.8328	29.9352	30.4231	30.2234	27.2687	26.2086	22.5817	36.0973	34.8374	28.308	19.9008	21.5456	25.3623	31.493	36.1491	33.0718	AREL1	apoptosis resistant E3 ubiquitin protein ligase 1
ENSG00000143761	582.163	579.813	599.139	677.21	728.49	731.988	539.787	558.135	639.522	619.722	627.337	603.733	539.071	574.598	553.597	601.729	654.926	628.099	ARF1	ADP ribosylation factor 1
ENSG00000134287	245.268	244.96	259.192	206.631	246.232	253.003	255.569	261.357	304.361	249.719	235.731	199.493	189.495	227.861	256	216.137	244.924	226.169	ARF3	ADP ribosylation factor 3
ENSG00000168374	195.002	218.857	229.066	277.199	252.685	266.726	215.439	216.392	210.74	256.374	264.915	265.663	213.486	223.57	210.59	265.375	265.447	260.548	ARF4	ADP ribosylation factor 4
ENSG00000272146	2.87831	2.4644	2.3319	3.5422	2.41047	2.35194	1.97584	2.55384	2.52414	3.09463	2.03688	3.10073	2.23074	2.65508	2.19789	3.15087	3.16395	2.8571	ARF4-AS1	ARF4 antisense RNA 1
ENSG00000004059	150.966	146.706	154.521	137.596	142.497	143.713	147.94	148.826	168.593	126.339	121.001	141.56	151.159	152.189	142.488	131.08	137.119	136.9	ARF5	ADP ribosylation factor 5
ENSG00000165527	113.68	101.588	111.715	131.685	144.46	140.53	105.698	107.584	184.049	112.008	109.523	116.672	116.037	117.987	130.586	114.474	114.781	120.284	ARF6	ADP ribosylation factor 6
ENSG00000101199	52.0883	45.2423	44.3889	62.595	66.3984	68.6759	52.3113	46.9754	53.5965	56.0788	61.5279	59.5943	38.6183	39.3252	44.8341	60.701	67.377	62.0012	ARFGAP1	ADP ribosylation factor GTPase activating protein 1
ENSG00000149182	97.4776	93.4838	99.3278	104.599	113.887	107.635	98.0748	97.6654	114.185	99.9338	104.958	100.464	99.3513	93.9646	96.687	97.712	108.306	104.083	ARFGAP2	ADP ribosylation factor GTPase activating protein 2
ENSG00000242247	18.1037	19.6397	20.4123	25.0277	25.1563	24.1293	17.4257	17.932	16.6065	23.3003	23.0474	23.2728	18.5162	19.3078	19.0563	24.5455	23.5383	24.2172	ARFGAP3	ADP ribosylation factor GTPase activating protein 3
ENSG00000066777	52.0596	59.4571	63.9658	70.4729	66.9609	70.3053	51.0833	50.7992	45.4921	68.4442	63.9874	58.1883	47.4464	47.5064	55.6193	77.778	84.6644	73.1347	ARFGEF1	ADP ribosylation factor guanine nucleotide exchange factor 1
ENSG00000124198	24.8212	26.8797	28.7106	40.7315	38.279	39.486	27.1242	26.8116	23.3435	42.0248	39.2295	33.7908	20.3757	24.5163	28.5038	42.9249	44.1307	41.9286	ARFGEF2	ADP ribosylation factor guanine nucleotide exchange factor 2
ENSG00000112379	7.29103	7.72919	8.48527	8.13027	8.50613	8.70058	8.70102	8.38596	7.92305	10.9474	9.95586	7.25358	4.8963	6.23769	7.80507	12.9216	13.9376	12.6294	ARFGEF3	ARFGEF family member 3
ENSG00000164144	29.036	32.3396	32.5442	40.4361	41.1998	38.9034	32.4495	33.027	30.8419	42.8097	40.0715	40.9101	29.6621	29.9726	32.8651	44.2217	42.9123	40.1808	ARFIP1	ADP ribosylation factor interacting protein 1
ENSG00000132254	102.422	94.7992	92.3691	140.92	152.692	157.015	104.86	100.309	96.1759	137.403	149.258	135.053	91.1121	88.317	85.4648	137.986	148.05	134.249	ARFIP2	ADP ribosylation factor interacting protein 2
ENSG00000101246	23.3547	21.4122	22.1937	31.7813	33.7312	32.3247	21.9461	22.0048	22.3247	26.9031	28.475	29.9434	23.2857	23.4407	21.239	28.5074	29.7324	31.1773	ARFRP1	ADP ribosylation factor related protein 1
ENSG00000081181	15.7999	19.6569	19.7281	10.9429	11.3037	11.4897	17.7218	16.4656	16.0141	11.5759	11.9804	10.4373	21.2255	20.7265	19.6897	13.4953	14.0716	12.4458	ARG2	arginase 2
ENSG00000134884	29.2375	28.8288	28.6488	40.5725	37.4572	37.8696	25.872	22.2292	25.5494	29.3012	26.8096	30.4685	19.5613	17.9185	16.1962	31.9052	32.5824	34.9115	ARGLU1	arginine and glutamate rich 1
ENSG00000175220	73.9981	69.6933	77.8774	84.2246	88.9831	89.3478	75.7692	77.1402	81.2187	73.7443	76.6977	67.3035	62.5042	66.6985	73.2649	69.4356	79.0618	76.6741	ARHGAP1	Rho GTPase activating protein 1
ENSG00000071205	2.53109	2.73301	2.84057	4.647	4.70871	5.04158	2.85668	2.67699	2.80186	4.07205	4.42116	3.35504	2.12307	2.17847	2.0947	3.72724	3.90285	4.40047	ARHGAP10	Rho GTPase activating protein 10
ENSG00000198826	54.8007	67.5539	74.5459	31.8009	35.1427	34.7279	68.0871	66.9821	48.1703	36.5473	37.994	28.7517	43.4988	52.8809	62.4817	37.9604	41.5033	39.5227	ARHGAP11A	Rho GTPase activating protein 11A
ENSG00000284906	3.15477	3.97228	4.81858	2.73027	2.48019	2.3719	3.99452	3.86134	3.50163	2.84606	3.20657	1.79278	1.58457	2.01313	3.28302	2.49012	2.48318	3.18012	ARHGAP11B	Rho GTPase activating protein 11B
ENSG00000165322	4.47096	5.72871	6.31075	11.9127	8.45549	8.4419	5.43683	6.42781	7.39431	10.9547	11.7506	10.993	5.66541	4.07791	4.54889	15.6884	11.373	10.9717	ARHGAP12	Rho GTPase activating protein 12
ENSG00000075884	10.7698	8.60049	8.59787	13.0404	12.7867	11.6529	13.4005	14.528	10.5234	14.985	11.9467	15.268	4.93041	3.38393	4.65374	3.88108	3.36793	4.58132	ARHGAP15	Rho GTPase activating protein 15
ENSG00000140750	24.7727	25.9606	31.8381	27.3073	22.0362	29.1449	24.4691	23.1277	21.8844	24.0867	26.1627	23.2879	17.959	19.6634	17.503	25.264	26.6699	24.7593	ARHGAP17	Rho GTPase activating protein 17
ENSG00000146376	9.27219	9.41967	9.78629	12.1198	12.2308	11.9729	9.42315	9.35685	9.07392	11.4939	11.2463	10.8269	10.4739	10.9887	11.2011	12.6042	12.2298	12.0265	ARHGAP18	Rho GTPase activating protein 18
ENSG00000213390	13.0262	12.8071	15.3939	10.5233	10.218	11.0124	13.7483	13.248	12.2999	11.188	10.6927	9.7978	10.7174	11.6584	11.9913	10.9883	12.6083	10.9355	ARHGAP19	Rho GTPase activating protein 19
ENSG00000107863	14.3734	15.7505	17.5631	22.2954	19.7604	22.0449	14.5083	13.5782	12.9079	21.2809	20.1234	15.7712	13.3906	16.6256	19.9558	25.3694	25.8712	23.4878	ARHGAP21	Rho GTPase activating protein 21
ENSG00000128805	0.405126	0.938415	1.22278	1.52328	1.48804	2.01412	0.379623	0.500389	0.148767	0.374119	0.236999	0.159196	0.192871	0.247474	0.213877	0.199096	0.293567	0.74654	ARHGAP22	Rho GTPase activating protein 22
ENSG00000275832	8.43032	9.83726	9.85365	11.9361	10.8233	13.666	8.32567	8.2106	11.6912	11.8426	8.34759	9.9824	5.86503	7.64039	7.92944	9.06872	7.5706	11.6437	ARHGAP23	Rho GTPase activating protein 23
ENSG00000138639	0.241392	0.452387	0.480489	1.64806	1.34667	1.27828	0.419132	0.404023	0.746128	1.77619	2.06184	1.37458	0.234137	0.255424	0.200616	2.06353	1.81863	1.72161	ARHGAP24	Rho GTPase activating protein 24
ENSG00000145819	1.67185	1.75613	1.97946	3.51948	3.31332	3.02598	1.51783	1.37511	2.05662	3.52221	3.38031	2.82883	1.37929	1.67666	1.9515	4.43809	4.86171	4.27852	ARHGAP26	Rho GTPase activating protein 26
ENSG00000159314	28.9709	23.8417	25.4425	47.8073	50.1965	45.5149	29.9508	29.2789	32.9492	43.668	46.6747	39.7204	20.4877	22.7421	24.9594	49.2604	47.2095	47.5993	ARHGAP27	Rho GTPase activating protein 27
ENSG00000215769	8.08261	6.26857	5.80894	17.5524	17.2726	18.4973	8.72765	6.05971	4.15685	13.0901	16.5162	10.997	3.03648	3.07104	5.04145	15.0353	16.247	16.5418	ARHGAP27P1-BPTFP1-KPNA2P3	ARHGAP27P1-BPTFP1-KPNA2P3 readthrough, transcribed pseudogene
ENSG00000088756	0.16639	0.205855	0.171821	0.327223	0.405177	0.324662	0.012669	0.195195	0.120404	0.207823	0.259922	0.30796	0.046844	0.118089	0.181086	0.031018	0.045634	0.051813	ARHGAP28	Rho GTPase activating protein 28
ENSG00000137962	18.9087	21.2683	21.3269	30.0277	28.7891	30.2004	20.1932	19.1908	14.2589	29.3665	28.0925	22.2558	10.9369	14.5081	15.5598	31.1628	30.8081	28.5987	ARHGAP29	Rho GTPase activating protein 29
ENSG00000226835	1.07061	0.680162	0.34072	0.410057	0.6614	0.421467	0.593205	1.3837	1.36259	0.154297	0.230077	0.124178	0.746165	0.294295	0.445963	0.339469	0.232052	0.850941	ARHGAP29-AS1	ARHGAP29 antisense RNA 1
ENSG00000186517	0.484844	0.367962	0.351789	0.368705	0.530249	0.630357	0.497637	0.608922	0.344114	0.422463	0.612695	0.470045	0.31089	0.21973	0.303083	0.505229	0.481154	0.62215	ARHGAP30	Rho GTPase activating protein 30
ENSG00000031081	0.940352	0.91686	0.982354	0.789079	0.781949	0.760155	0.969585	1.32438	1.47411	1.04694	0.983965	0.711822	0.620275	0.731102	0.85121	1.19999	1.05727	1.16845	ARHGAP31	Rho GTPase activating protein 31
ENSG00000241155	1.02629	0.831913	0.521916	0.95253	0.886994	0.843465	0.20182	0.670003	0.705931	0.359543	0.808404	0.509551	1.17369	0.919881	0.791478	1.94169	1.38677	1.05014	ARHGAP31-AS1	ARHGAP31 antisense RNA 1
ENSG00000134909	23.7483	25.4131	25.5076	39.5919	41.9255	43.5036	23.3331	24.2965	26.6218	48.6233	42.3266	28.268	15.125	23.3947	34.5411	42.9174	48.9703	44.6892	ARHGAP32	Rho GTPase activating protein 32
ENSG00000004777	8.64677	6.43726	4.45905	5.95577	5.92594	5.15868	9.54828	5.42317	8.79131	2.99941	3.95406	3.81826	2.68716	2.05205	2.79772	3.9753	3.96936	4.0723	ARHGAP33	Rho GTPase activating protein 33
ENSG00000160007	38.4103	37.8641	42.5017	54.4411	55.3667	54.1559	37.0939	37.5659	36.8573	57.4598	54.8637	45.3803	38.9601	48.5653	53.4023	56.3342	61.2244	56.6996	ARHGAP35	Rho GTPase activating protein 35
ENSG00000147799	11.54	9.70077	10.9415	11.7263	12.3084	13.1089	9.61877	9.80867	10.5638	11.6068	11.144	10.9918	8.4012	8.72307	8.91266	10.8145	11.1008	11.4133	ARHGAP39	Rho GTPase activating protein 39
ENSG00000089820	24.5775	18.5785	19.3394	21.7633	23.5113	21.0983	23.7109	22.6864	23.0147	24.7402	25.7507	26.5359	22.1902	19.0643	19.1025	20.5206	22.0748	24.1811	ARHGAP4	Rho GTPase activating protein 4
ENSG00000124143	14.191	12.5486	13.1187	19.0016	20.1868	18.9685	9.84996	10.5871	9.42733	11.7183	14.7417	13.6305	8.95455	7.10492	8.38721	15.6562	16.3351	17.3864	ARHGAP40	Rho GTPase activating protein 40
ENSG00000165895	0.512449	0.484258	0.550019	0.571891	0.558383	0.644318	0.489265	0.551901	0.595809	0.60755	0.715305	0.52695	0.339257	0.397663	0.495331	1.04532	0.995561	0.865817	ARHGAP42	Rho GTPase activating protein 42
ENSG00000006740	2.35983	2.34395	2.6637	1.97669	2.27911	2.26895	2.71327	3.317	3.0994	3.46749	3.5696	2.96101	1.7147	2.35127	3.20901	2.10311	2.50472	2.40904	ARHGAP44	Rho GTPase activating protein 44
ENSG00000180448	9.96036	8.61609	9.57856	19.0067	22.5307	22.7309	8.12091	7.47358	7.86287	16.1183	16.5706	19.7349	11.4346	9.90643	9.98385	23.539	26.6998	23.609	ARHGAP45	Rho GTPase activating protein 45
ENSG00000100852	27.2092	32.2428	35.1164	62.3871	59.2614	60.8506	37.395	36.7963	20.5086	70.8588	64.9802	57.5688	29.413	39.3168	45.7158	68.1692	71.5707	66.3279	ARHGAP5	Rho GTPase activating protein 5
ENSG00000241484	25.8413	23.3757	22.4358	28.3559	29.2473	26.7195	20.9882	21.352	20.9789	23.6222	25.0112	21.8405	20.0669	18.3207	20.7198	20.4699	24.8787	26.5869	ARHGAP8	Rho GTPase activating protein 8
ENSG00000141522	355.284	322.371	346.845	291.115	315.501	344.772	307.187	311.182	375.822	307.077	294.308	290.895	305.012	336.545	298.828	283.06	293.399	273.247	ARHGDIA	Rho GDP dissociation inhibitor alpha
ENSG00000111348	10.578	9.88174	10.4002	19.6341	21.271	24.2273	9.69348	10.8034	8.78764	19.8781	21.7789	20.8696	13.0359	14.0385	12.3583	22.6308	22.6064	22.0275	ARHGDIB	Rho GDP dissociation inhibitor beta
ENSG00000242173	5.69029	5.79904	5.38955	0.572548	0.66581	0.909703	3.38118	3.57245	4.36964	0.553415	1.02293	1.28258	1.98368	1.6793	1.72037	0.295696	0.253567	0.710225	ARHGDIG	Rho GDP dissociation inhibitor gamma
ENSG00000076928	23.1242	18.7909	22.1338	21.2313	22.4132	22.8323	21.2756	22.8314	26.5222	21.2816	25.8124	20.8889	17.7325	18.1123	17.2774	21.3796	21.4283	20.459	ARHGEF1	Rho guanine nucleotide exchange factor 1
ENSG00000104728	9.1438	9.9022	10.4463	12.1241	11.7313	11.6821	9.26269	8.42497	9.34124	10.2322	11.0454	10.2416	7.99581	8.91525	9.7777	11.8042	14.4776	11.8861	ARHGEF10	Rho guanine nucleotide exchange factor 10
ENSG00000074964	9.99409	8.43533	9.20386	12.6755	13.2306	12.8881	8.48907	9.02899	10.5149	12.059	11.7191	11.8792	8.98482	9.73555	9.84853	11.4867	13.2323	11.471	ARHGEF10L	Rho guanine nucleotide exchange factor 10 like
ENSG00000132694	16.5703	14.7686	17.1228	23.294	25.5011	25.439	16.8363	16.1963	17.7647	23.3372	23.0177	19.1533	12.159	13.3046	15.0461	22.7036	25.1921	23.5083	ARHGEF11	Rho guanine nucleotide exchange factor 11
ENSG00000196914	43.1735	46.2076	53.1642	77.2828	72.897	73.5588	51.1755	50.727	40.4026	91.4614	81.3463	65.2438	39.4275	52.1878	60.351	88.1311	91.2308	79.9186	ARHGEF12	Rho guanine nucleotide exchange factor 12
ENSG00000130762	15.199	14.5029	14.873	16.3321	17.2101	18.8311	15.7704	14.0768	16.0069	16.3708	16.0309	16.1794	12.6611	12.1703	11.9506	17.8273	17.5575	18.3295	ARHGEF16	Rho guanine nucleotide exchange factor 16
ENSG00000110237	43.4421	36.6798	38.7359	41.0314	45.5988	49.9432	40.7718	38.1305	37.0121	47.5907	47.3875	42.2824	33.0432	36.3569	42.336	46.9198	56.0365	47.6282	ARHGEF17	Rho guanine nucleotide exchange factor 17
ENSG00000104880	16.1367	13.9803	18.3962	10.7835	10.1817	11.7194	15.1858	15.3077	16.5445	10.7509	10.4919	10.2307	12.0175	14.599	14.5414	10.4796	10.3063	9.57953	ARHGEF18	Rho/Rac guanine nucleotide exchange factor 18
ENSG00000142632	27.1584	23.7231	25.3818	13.4401	15.1866	16.6096	24.4355	24.0703	26.7022	14.0312	13.7544	13.4512	23.2723	23.0347	24.4472	14.8648	14.9963	13.8035	ARHGEF19	Rho guanine nucleotide exchange factor 19
ENSG00000116584	45.599	35.1057	42.9489	25.6211	27.5102	25.9925	35.2901	38.1523	45.3353	28.0338	30.7741	27.379	27.7747	34.4412	33.725	33.3386	26.6504	29.5383	ARHGEF2	Rho/Rac guanine nucleotide exchange factor 2
ENSG00000240771	5.3096	3.70476	4.39444	4.29691	3.60923	3.87865	5.27873	4.67385	4.49418	3.68218	4.41544	4.02912	3.864	3.45926	3.38608	5.09272	4.55079	4.54678	ARHGEF25	Rho guanine nucleotide exchange factor 25
ENSG00000114790	10.4385	10.8023	12.4355	7.41268	7.18674	7.54393	10.4023	9.88913	7.62672	7.59901	8.16213	6.81353	7.18757	7.96442	7.92935	8.59989	7.91783	8.13636	ARHGEF26	Rho guanine nucleotide exchange factor 26
ENSG00000243069	1.1152	2.06484	2.80676	2.54215	3.3824	2.61475	2.09212	2.30146	1.65588	3.57573	2.98026	2.43617	1.83689	1.81235	1.94143	2.72537	1.94019	2.17472	ARHGEF26-AS1	ARHGEF26 antisense RNA 1
ENSG00000214944	3.09981	3.97645	3.81248	7.01354	6.65243	6.86433	3.62611	3.44135	2.39244	6.69795	6.78927	5.49661	2.69537	2.67739	2.82874	6.71091	7.05291	7.0522	ARHGEF28	Rho guanine nucleotide exchange factor 28
ENSG00000163947	3.27097	3.49451	4.22068	3.01134	3.21189	4.28491	3.65283	3.72574	2.89928	3.49514	3.4915	3.19725	2.35686	3.39845	3.76069	4.06056	3.45819	3.41128	ARHGEF3	Rho guanine nucleotide exchange factor 3
ENSG00000213214	30.5768	28.289	28.4497	31.7614	35.6424	34.2833	25.0818	26.3277	26.1852	30.5578	31.6084	32.9377	25.1296	25.3374	27.9158	31.9327	31.8328	34.5147	ARHGEF35	Rho guanine nucleotide exchange factor 35
ENSG00000183111	12.4905	11.9104	12.7026	31.3813	31.3	33.0488	10.6474	10.5591	10.8954	27.6562	26.1255	25.7807	9.70617	10.3143	9.8235	26.0927	26.7336	27.7656	ARHGEF37	Rho guanine nucleotide exchange factor 37
ENSG00000236699	10.4291	10.8581	11.5404	21.1737	19.294	19.6364	12.4354	11.0868	9.19796	21.031	22.3112	15.5446	8.86929	10.1817	12.7505	25.9572	27.1568	24.5322	ARHGEF38	Rho guanine nucleotide exchange factor 38
ENSG00000249885	0.644412	0.495779	1.00334	0.764793	0.968298	0.858012	0.325735	0.396303	1.17767	0.146542	0.843016	1.01268	0.105276	1.06686	0.303703	1.0013	0.979294	1.35925	ARHGEF38-IT1	ARHGEF38 intronic transcript 1
ENSG00000137135	17.6513	17.5492	16.0867	5.2944	5.92999	6.66747	15.6159	16.3185	14.5831	5.62901	6.38053	5.45754	9.95432	13.6342	10.7339	7.02554	6.42879	6.82777	ARHGEF39	Rho guanine nucleotide exchange factor 39
ENSG00000136002	0.450037	0.398309	0.691082	0.944717	0.975168	1.08569	0.71967	0.707354	0.673696	1.34356	0.800917	1.10734	0.25211	0.298844	0.319173	0.74153	0.400941	0.5403	ARHGEF4	Rho guanine nucleotide exchange factor 4
ENSG00000165801	4.67971	5.09706	4.43423	5.19715	5.59109	5.16787	4.54861	4.63823	4.65904	5.7224	6.34836	5.21016	3.47719	4.13355	3.46403	6.04421	7.25282	6.18452	ARHGEF40	Rho guanine nucleotide exchange factor 40
ENSG00000050327	9.32091	8.1266	9.79773	9.50419	10.8449	10.9399	8.25259	8.64457	10.1441	12.4545	11.667	9.12497	7.54852	9.05976	9.36017	10.9625	11.8648	11.1639	ARHGEF5	Rho guanine nucleotide exchange factor 5
ENSG00000129675	6.2549	7.0797	7.47421	10.1932	9.97436	10.0478	5.77277	5.81414	4.62618	9.01338	9.33939	7.44658	7.78505	8.4531	8.86076	12.4693	12.5738	12.2264	ARHGEF6	Rac/Cdc42 guanine nucleotide exchange factor 6
ENSG00000102606	16.6602	16.0317	18.6189	25.6743	24.915	24.9258	16.0127	17.2033	15.7582	25.8129	25.3625	19.8626	13.5077	14.2384	17.6231	21.186	22.609	22.0088	ARHGEF7	Rho guanine nucleotide exchange factor 7
ENSG00000131089	7.78941	7.68853	9.45969	10.2857	10.3511	9.86262	8.20872	8.99356	8.64561	11.3377	10.1869	8.83953	7.39778	9.99139	9.91957	11.2939	11.9781	10.5665	ARHGEF9	Cdc42 guanine nucleotide exchange factor 9
ENSG00000117713	8.53505	7.33639	8.58578	10.9965	10.6908	11.3012	9.33283	7.65123	6.86229	10.4746	10.2923	9.03943	6.02493	5.91716	7.07039	10.8949	11.5171	12.0068	ARID1A	AT-rich interaction domain 1A
ENSG00000049618	16.5946	17.2894	18.6149	27.4119	24.1247	25.4305	17.627	18.4886	19.165	26.97	25.6585	24.6698	16.8083	17.3118	17.9611	26.7487	27.7528	27.1757	ARID1B	AT-rich interaction domain 1B
ENSG00000189079	12.6134	14.118	14.9624	13.745	13.6618	15.6921	14.9378	13.73	9.81021	16.3693	13.5966	11.583	9.39755	11.4661	15.2853	14.6325	15.9021	14.2567	ARID2	AT-rich interaction domain 2
ENSG00000116017	9.21096	8.80609	7.12709	3.8906	4.50255	5.25835	8.56092	7.24039	9.70704	3.87504	3.46374	4.34386	4.70865	7.38427	7.56323	3.34141	6.2868	5.16809	ARID3A	AT-rich interaction domain 3A
ENSG00000179361	3.09718	3.2405	3.80275	3.36982	3.52028	3.51826	2.97642	2.94728	2.77882	3.24984	2.85089	2.5102	2.56387	2.60421	3.14498	2.77095	3.81867	2.97086	ARID3B	AT-rich interaction domain 3B
ENSG00000205143	5.11184	5.00608	5.55984	4.44974	5.09903	4.64341	5.6799	6.04523	7.01283	4.0203	4.04069	4.06233	6.18119	5.83053	6.48211	4.00294	4.6407	4.10423	ARID3C	AT-rich interaction domain 3C
ENSG00000032219	9.37739	11.0562	11.002	15.4383	14.2897	15.5073	12.0569	11.5286	7.57165	14.3018	16.024	13.5526	7.68632	9.72066	10.8563	18.1783	17.5554	16.4136	ARID4A	AT-rich interaction domain 4A
ENSG00000054267	18.7122	22.9639	22.053	30.711	26.365	26.2371	21.1245	19.6951	14.4042	28.4007	25.7348	24.7954	17.7182	19.4605	21.7915	29.9318	29.6122	31.2191	ARID4B	AT-rich interaction domain 4B
ENSG00000196843	2.13107	1.56872	1.66689	0.537343	0.372693	0.698874	1.83096	1.85297	1.91722	0.565741	0.35922	0.480735	0.483326	0.691602	0.432763	0.537264	0.324936	0.322169	ARID5A	AT-rich interaction domain 5A
ENSG00000150347	7.19735	7.74812	8.70074	14.436	13.2123	13.624	10.1399	9.53665	9.0442	16.6539	16.2211	13.6903	9.32469	11.2406	12.0218	17.1667	18.9996	17.5927	ARID5B	AT-rich interaction domain 5B
ENSG00000166233	57.1193	57.5148	64.0946	70.3501	71.7685	77.6281	58.8949	58.6383	48.8305	78.6905	70.6123	63.3136	50.4818	57.2949	59.6883	76.954	78.7777	80.5519	ARIH1	ariadne RBR E3 ubiquitin protein ligase 1
ENSG00000177479	41.7513	45.2439	49.3049	41.5542	43.0371	49.276	45.9931	44.9972	38.7905	45.6966	44.9282	40.4157	33.1703	33.0287	37.4922	41.1285	42.1329	42.4922	ARIH2	ariadne RBR E3 ubiquitin protein ligase 2
ENSG00000221883	1.2245	1.05813	1.34426	2.49911	3.11696	2.40332	1.06397	1.03333	0.944331	2.17398	2.70179	1.99384	1.50315	1.21599	0.987032	1.93109	1.96867	2.35977	ARIH2OS	ariadne RBR E3 ubiquitin protein ligase 2 opposite strand
ENSG00000120805	125.986	175.619	166.889	240.695	228.253	232.592	161.773	159.424	109.556	231.463	200.913	198.148	160.105	165.143	165.999	225.841	221.44	229.876	ARL1	ADP ribosylation factor like GTPase 1
ENSG00000175414	0.011147	0.372762	0.358936	0	0.156768	0.01524	0.313768	0.287097	0.451107	0.015832	0.178505	0.204592	0.443824	0.255184	0.013393	0.216405	0.008303	0.026184	ARL10	ADP ribosylation factor like GTPase 10
ENSG00000152213	6.7999	6.66829	4.27551	6.0071	7.37729	6.96652	8.95591	5.37059	7.28535	10.9713	8.27939	7.76862	4.75646	5.42148	5.38439	8.74602	8.85222	9.02849	ARL11	ADP ribosylation factor like GTPase 11
ENSG00000169379	6.34371	6.51917	6.68215	6.95161	7.58104	7.36535	6.17389	6.86504	5.33147	7.83161	7.509	7.60757	5.64609	6.03344	5.73586	7.7705	7.91237	7.18372	ARL13B	ADP ribosylation factor like GTPase 13B
ENSG00000152219	29.2947	36.3304	32.3909	37.842	36.9924	39.4169	32.8246	31.2905	23.4525	40.2411	34.2172	37.5574	29.4912	30.5009	34.026	39.4845	41.1082	37.7051	ARL14EP	ADP ribosylation factor like GTPase 14 effector protein
ENSG00000185305	10.8671	11.6749	12.3284	30.5625	26.3488	29.5713	12.0143	11.637	10.953	30.7704	31.6483	25.0685	12.5881	15.331	16.0516	34.9178	37.6121	30.4918	ARL15	ADP ribosylation factor like GTPase 15
ENSG00000214087	41.12	41.3179	37.3066	44.8238	45.3771	47.9727	39.6163	38.7813	39.6923	41.9973	44.2577	43.3732	39.3026	35.6429	37.4725	44.7818	42.3256	40.557	ARL16	ADP ribosylation factor like GTPase 16
ENSG00000228696	19.7806	18.6917	17.9831	23.3782	19.8434	21.291	17.5362	17.2886	14.4906	21.3111	17.7671	19.6218	17.1656	18.0816	17.7065	18.2782	23.9959	23.0725	ARL17A	ADP ribosylation factor like GTPase 17A
ENSG00000185829	6.29694	7.04067	6.41444	7.01286	7.66088	7.85157	7.03803	6.43446	4.79359	7.61211	8.14861	5.10719	4.25483	5.75032	6.16907	8.52289	8.59732	7.61509	ARL17A	ADP ribosylation factor like GTPase 17A
ENSG00000213465	73.2265	69.3717	72.0397	54.5404	59.4116	58.1475	74.0041	77.9107	92.4171	59.8433	63.2745	64.4944	66.3014	63.2849	57.9844	52.1928	60.0797	57.0436	ARL2	ADP ribosylation factor like GTPase 2
ENSG00000102931	42.8564	49.9997	51.5975	54.2529	56.283	53.471	47.0046	49.1459	44.6661	43.2175	43.9192	43.7069	48.4254	48.0718	47.5567	49.0737	47.7047	48.5059	ARL2BP	ADP ribosylation factor like GTPase 2 binding protein
ENSG00000138175	32.0431	39.0192	38.0227	16.2283	15.904	15.9756	32.4885	32.2774	28.7966	13.3879	13.7765	13.6474	32.3533	31.9546	30.5346	14.2376	14.3513	14.4512	ARL3	ADP ribosylation factor like GTPase 3
ENSG00000122644	11.0833	12.3944	12.6893	14.3041	14.038	13.142	10.9333	11.8401	9.1688	14.5532	14.2868	16.2313	8.4125	8.73767	8.11084	12.5717	10.6803	12.1385	ARL4A	ADP ribosylation factor like GTPase 4A
ENSG00000188042	0.610492	0.740604	0.836884	0.712634	0.868156	1.13011	0.889602	0.759105	0.948545	0.992117	0.91142	1.0065	0.759364	0.964987	0.612392	0.643726	0.615402	0.793716	ARL4C	ADP ribosylation factor like GTPase 4C
ENSG00000175906	26.3974	26.2431	26.631	82.1248	88.2798	90.6823	20.9413	19.5046	21.7577	76.2582	81.2123	87.9951	51.8831	49.9217	43.6649	93.027	101.681	96.5559	ARL4D	ADP ribosylation factor like GTPase 4D
ENSG00000162980	18.6907	19.3295	20.2626	21.7357	19.6636	18.5695	17.4547	18.0496	17.339	23.9601	20.3204	21.8841	16.2651	15.1373	20.9684	18.9401	21.9584	19.6396	ARL5A	ADP ribosylation factor like GTPase 5A
ENSG00000165997	5.35034	6.85465	6.93032	4.80398	4.50535	4.55761	6.71992	6.63886	3.1863	6.0204	5.29101	4.70571	4.28981	5.10862	6.03179	5.95763	5.67304	5.28303	ARL5B	ADP ribosylation factor like GTPase 5B
ENSG00000113966	5.72104	9.82165	7.30405	10.5182	10.9896	12.0324	9.00369	8.436	6.07375	10.9108	11.1869	9.32724	5.39992	7.83328	8.15447	10.3957	9.82161	8.64811	ARL6	ADP ribosylation factor like GTPase 6
ENSG00000170540	416.945	483.03	474.353	321.683	297.01	319.051	497.442	501.305	481.947	350.513	350.614	347.039	501.189	500.021	493.926	344.757	353.129	343.453	ARL6IP1	ADP ribosylation factor like GTPase 6 interacting protein 1
ENSG00000182196	277.951	282.627	295.853	234.222	262.685	246.299	277.415	285.181	345.726	238.141	251.263	276.514	330.567	300.842	294.443	228.041	244.793	248.669	ARL6IP4	ADP ribosylation factor like GTPase 6 interacting protein 4
ENSG00000144746	70.7977	80.3491	76.7457	103.332	104.717	105.191	69.5695	68.0287	73.8684	100.507	96.0925	99.8196	78.3472	81.1455	81.6868	105.005	105.873	102.824	ARL6IP5	ADP ribosylation factor like GTPase 6 interacting protein 5
ENSG00000177917	24.2182	27.1617	28.7395	25.8567	20.3278	22.3836	29.1257	26.6313	20.0357	22.4491	21.7776	22.3761	22.3642	20.286	22.9495	27.5792	23.9511	25.19	ARL6IP6	ADP ribosylation factor like GTPase 6 interacting protein 6
ENSG00000143862	28.5444	26.9614	29.9605	52.9941	57.4157	56.2056	31.9144	29.4537	31.9535	55.0814	55.8878	51.5697	31.0156	33.6506	30.9211	54.6472	52.142	57.634	ARL8A	ADP ribosylation factor like GTPase 8A
ENSG00000134108	62.8097	81.8973	83.3174	119.695	111.422	111.293	76.0055	79.5094	57.4507	122.019	114.262	105.524	69.5995	73.1741	75.1433	126.335	128.092	123.857	ARL8B	ADP ribosylation factor like GTPase 8B
ENSG00000104442	58.4916	66.1431	61.9652	62.7264	63.5626	61.6141	64.0992	61.2829	60.3466	63.5166	58.9989	60.3147	54.7817	58.2223	61.0272	64.2911	63.0925	63.1682	ARMC1	armadillo repeat containing 1
ENSG00000170632	25.4599	37.672	36.7331	35.1088	32.1538	31.9313	37.7679	39.2759	24.5094	36.314	37.3951	37.2467	31.515	32.0208	31.6854	38.5055	33.4457	32.9307	ARMC10	armadillo repeat containing 10
ENSG00000157343	0.859751	0.598899	0.556015	0.988275	1.09533	1.05768	0.96276	0.746853	0.471142	0.798956	0.805577	0.964472	0.579735	0.318931	0.711264	0.709591	0.588501	0.647886	ARMC12	armadillo repeat containing 12
ENSG00000118690	3.4626	4.64145	3.74835	3.56878	5.72057	4.19741	5.27303	3.7768	1.57492	5.12977	4.8039	4.42539	3.21313	3.31338	3.38637	4.93228	5.38617	4.16812	ARMC2	armadillo repeat containing 2
ENSG00000165309	2.79495	2.58945	2.35617	3.59932	3.54489	3.6112	1.89601	2.46076	1.0056	4.24739	5.29376	4.00047	0.589006	0.482943	1.01437	0.925477	0.458454	0.381082	ARMC3	armadillo repeat containing 3
ENSG00000169126	1.27588	0.973631	1.09359	1.34915	2.06857	1.99852	1.67916	0.830405	1.2762	2.01452	1.74378	1.19507	0.60519	0.690594	1.01994	0.501852	0.696714	0.655252	ARMC4	armadillo repeat containing 4
ENSG00000140691	5.80032	5.48175	5.75279	6.21453	5.75535	6.42142	5.82684	6.0507	7.81585	6.1692	6.41552	6.91109	6.88001	6.92077	5.61894	5.8798	5.88254	6.26093	ARMC5	armadillo repeat containing 5
ENSG00000105676	26.8068	27.5475	28.3151	21.8774	23.119	23.3743	28.5172	31.5191	32.9828	22.0757	23.5056	23.8049	27.0054	28.3141	25.9166	20.3605	25.0592	23.6914	ARMC6	armadillo repeat containing 6
ENSG00000125449	19.4198	19.2436	20.8316	18.1831	17.3862	16.5755	18.5513	19.2754	21.9683	16.2367	17.6339	18.0219	18.8068	18.565	17.329	15.3994	16.72	17.5799	ARMC7	armadillo repeat containing 7
ENSG00000114098	34.3762	33.9615	34.1961	36.2153	35.8922	34.899	34.3814	32.9947	27.509	33.1007	32.4288	31.8663	30.0921	28.3923	30.6864	33.7747	39.1586	35.3249	ARMC8	armadillo repeat containing 8
ENSG00000135931	8.64496	9.82782	9.95214	11.5464	12.642	13.605	9.23017	8.26017	7.66105	11.4953	13.0883	10.1592	5.70409	5.86004	6.20204	9.43481	10.1416	8.84489	ARMC9	armadillo repeat containing 9
ENSG00000126947	4.89871	5.50514	5.80487	11.7806	10.9995	9.95083	6.02955	6.07996	5.64308	14.3224	12.2366	13.7025	7.78378	6.9552	6.51083	18.5432	18.875	18.663	ARMCX1	armadillo repeat containing X-linked 1
ENSG00000184867	24.8346	23.7082	25.8322	25.9229	27.9393	29.1816	28.5938	27.6348	25.4758	28.1292	27.888	29.1315	24.8169	27.9338	29.2836	30.0016	28.0944	26.5221	ARMCX2	armadillo repeat containing X-linked 2
ENSG00000102401	23.6787	22.6559	23.6882	50.822	54.8576	47.7247	23.29	21.8213	24.7531	48.482	44.9948	40.3873	21.8585	24.1464	22.0978	56.6553	55.7037	53.1207	ARMCX3	armadillo repeat containing X-linked 3
ENSG00000196440	0.73946	1.07857	1.26502	1.27473	1.04534	1.8071	0.499421	0.346043	0.545233	0.709316	1.08711	1.29884	0.9815	1.68386	1.31807	1.70695	2.29959	1.45765	ARMCX4	armadillo repeat containing X-linked 4
ENSG00000125962	5.2362	6.34477	6.32726	5.67111	4.6456	6.86609	5.99362	6.04565	4.95404	4.13681	6.7876	5.10204	4.88409	5.16872	5.04117	6.68155	5.48592	5.40495	ARMCX5	armadillo repeat containing X-linked 5
ENSG00000286237	0.160356	0.264	0.227527	0.385849	0.165959	0.478519	0.103712	0.202165	0.136009	0.425418	0.080444	0.335692	0.338993	0.221202	0.182706	0.082632	0.308701	0.384525	ARMCX5-GPRASP2	ARMCX5-GPRASP2 readthrough
ENSG00000198960	36.5474	40.6282	36.0095	65.619	64.6933	65.3149	32.5208	34.2221	35.7808	54.6443	55.4314	56.2946	41.0847	34.5988	36.0746	65.8816	61.6814	64.0016	ARMCX6	armadillo repeat containing X-linked 6
ENSG00000198520	0.484122	0.789896	0.551092	2.0279	1.96734	2.53054	0.566976	0.420608	0.654623	0.538939	2.05198	1.8306	0.557787	0.340868	0.52647	1.04486	0.662316	1.12887	ARMH1	armadillo like helical domain containing 1
ENSG00000120029	27.2706	28.8419	31.4741	29.7263	30.1608	31.6973	28.7301	31.0109	26.5271	31.3365	31.8251	28.3787	24.5749	29.1066	30.8074	29.5427	30.4994	29.3154	ARMH3	armadillo like helical domain containing 3
ENSG00000139971	0.393562	0.250113	0.250298	0.965234	0.5757	0.878853	0.498492	0.795539	1.15713	0.606037	0.952129	0.536587	0.65664	0.399779	0.660207	0.785155	0.54523	1.01892	ARMH4	armadillo like helical domain containing 4
ENSG00000146476	84.2497	113.07	105.865	69.2416	62.8313	65.1866	97.0706	98.7416	71.2463	57.5176	51.7858	55.8827	82.1844	82.6873	83.4075	65.9775	66.5044	62.566	ARMT1	acidic residue methyltransferase 1
ENSG00000143437	24.421	25.8207	28.975	28.3966	28.242	29.342	24.8052	25.5806	22.8504	29.7094	27.6634	23.3345	19.2965	23.6291	28.6045	26.9746	32.7419	29.2627	ARNT	aryl hydrocarbon receptor nuclear translocator
ENSG00000172379	0.254608	0.600867	0.165242	0.095572	0.201733	0.247596	0.077527	0.201891	0.082681	0.335727	0.111732	0.164945	0.126594	0.150953	0.216141	0.075011	0.266924	0.152219	ARNT2	aryl hydrocarbon receptor nuclear translocator 2
ENSG00000133794	5.7712	6.17461	6.28712	6.47966	6.32619	5.60595	7.63324	8.49953	6.50271	6.61884	7.06559	6.42613	5.79382	5.2519	6.48695	6.3885	6.5942	8.02078	ARNTL	aryl hydrocarbon receptor nuclear translocator like
ENSG00000029153	1.28195	0.990453	1.05815	0.327356	0.2655	0.290166	0.867569	1.05069	0.878365	0.931588	0.566343	0.458175	0.654359	0.936457	1.28078	0.398227	0.781008	0.440373	ARNTL2	aryl hydrocarbon receptor nuclear translocator like 2
ENSG00000241685	106.854	103.924	115.543	96.5815	101.029	97.177	108.219	108.8	118.738	99.1548	94.5017	101.545	105.885	105.017	101.438	89.7365	86.9262	90.8219	ARPC1A	actin related protein 2/3 complex subunit 1A
ENSG00000130429	80.4167	70.9836	82.6457	137.371	128.285	136.7	83.6401	77.1883	87.0384	128.015	116.279	120.179	59.1714	61.8885	50.2712	83.9729	82.4806	87.8175	ARPC1B	actin related protein 2/3 complex subunit 1B
ENSG00000163466	185.695	200.147	200.358	184.895	189.857	195.698	190.405	192.337	201.54	199.194	200.677	209.337	177.936	185.645	182.411	185.403	187.111	183.681	ARPC2	actin related protein 2/3 complex subunit 2
ENSG00000111229	741.46	759.82	707.352	861.05	907.281	860.371	809.882	790.596	951.18	914.837	869.824	955.979	819.679	839.856	798.762	913.245	870.88	876.99	ARPC3	actin related protein 2/3 complex subunit 3
ENSG00000241553	182.409	181.123	172.059	158.503	179.178	174.776	196.211	194.025	200.18	166.144	152.003	164.973	165.375	173.126	166.832	158.155	167.454	155.32	ARPC4	actin related protein 2/3 complex subunit 4
ENSG00000250151	5.17586	6.15919	3.79798	5.46066	5.90369	6.16479	6.9293	2.71322	4.10142	4.23358	7.23545	6.00295	2.36167	4.00582	2.94556	4.33113	3.98311	4.02765	ARPC4-TTLL3	ARPC4-TTLL3 readthrough
ENSG00000162704	176.964	187.382	192.67	239.954	239.021	237.051	172.952	172.169	167.699	221.5	213.117	227.356	195.349	193.107	195.836	241.568	235.379	241.463	ARPC5	actin related protein 2/3 complex subunit 5
ENSG00000136950	115.369	121.572	131.841	93.9975	99.3183	96.6043	123.952	130.715	128.932	104.187	105.568	116.182	115.388	108.748	102.953	92.0121	92.0321	93.448	ARPC5L	actin related protein 2/3 complex subunit 5 like
ENSG00000242498	19.2836	20.3298	21.5178	55.0642	61.436	59.8884	23.5127	22.5329	23.4802	60.8052	62.6987	56.963	30.7168	32.3501	33.3414	57.4087	66.1783	58.0665	ARPIN	actin related protein 2/3 complex inhibitor
ENSG00000250021	16.4394	20.2804	19.477	21.7162	20.0072	23.1138	19.2178	20.8189	21.731	19.3185	19.5219	19.9639	20.8018	22.9396	22.6817	17.8456	18.9402	20.6483	ARPIN-AP3S2	ARPIN-AP3S2 readthrough
ENSG00000128989	74.723	88.247	93.3328	85.5195	78.5391	82.724	87.2744	80.4635	68.6581	93.9432	84.6284	74.6811	71.3632	74.6117	83.1224	85.5562	94.8477	86.4146	ARPP19	cAMP regulated phosphoprotein 19
ENSG00000137486	44.545	44.1482	49.8576	46.5413	50.5667	47.9194	44.7335	50.3213	54.4963	45.3768	45.4033	45.5035	35.6047	37.3023	39.6507	42.6672	46.3331	44.333	ARRB1	arrestin beta 1
ENSG00000141480	23.9571	21.8858	21.1783	13.8909	16.154	16.3259	21.5429	20.6931	22.3287	14.2598	14.9347	15.7208	17.8272	17.5885	16.6235	13.5196	14.2059	13.9537	ARRB2	arrestin beta 2
ENSG00000197070	233.432	210.123	219.096	549.143	570.965	573.544	203.807	195.162	226.579	481.029	502.017	484.265	206.48	204.457	204.614	520.307	595.086	558.586	ARRDC1	arrestin domain containing 1
ENSG00000203993	4.3227	3.89822	4.03069	1.3461	1.38411	1.40842	3.62384	3.06124	3.87387	1.33533	1.35453	1.54295	2.42466	2.30155	2.78275	0.858983	0.876304	1.1256	ARRDC1-AS1	ARRDC1 antisense RNA 1
ENSG00000105643	7.47875	6.30243	6.97732	5.66421	6.10454	5.93562	7.3426	6.87001	6.59373	5.82678	5.58666	5.2308	4.35779	3.54684	4.64699	5.05348	6.63238	5.19664	ARRDC2	arrestin domain containing 2
ENSG00000113369	15.3023	13.5786	13.4729	28.5941	26.6	29.8505	16.6714	14.6344	13.1518	30.4892	29.1531	23.847	17.4448	16.7013	18.4415	35.1952	40.6396	33.0605	ARRDC3	arrestin domain containing 3
ENSG00000281357	6.49574	6.86868	6.98793	7.59946	9.12059	9.04812	5.79678	6.41914	7.22926	6.20207	7.57363	8.37794	6.06658	5.0222	5.74834	7.24414	6.0542	6.96555	ARRDC3-AS1	ARRDC3 antisense RNA 1
ENSG00000140450	3.05079	3.11858	3.23549	5.33542	5.01821	5.57252	2.95451	2.65557	2.13674	4.32614	4.24463	3.82496	3.0162	3.44551	3.41307	5.65674	5.6123	4.93044	ARRDC4	arrestin domain containing 4
ENSG00000100299	14.1859	10.8975	12.0131	25.3969	25.9103	25.7249	10.3601	12.0377	11.7544	20.9311	20.4435	23.6927	12.4537	11.4123	11.3543	21.7059	23.3144	22.8401	ARSA	arylsulfatase A
ENSG00000113273	5.00278	4.61636	6.2002	2.8816	3.01973	3.08202	4.16557	4.57101	4.43735	3.17672	2.6162	2.63408	3.36521	3.81636	4.9529	2.77272	2.7601	3.53987	ARSB	arylsulfatase B
ENSG00000006756	26.3065	26.1393	29.3025	42.4215	44.0016	46.2721	26.0255	26.6586	23.6893	43.2182	42.444	39.7036	24.2606	30.1174	29.7528	45.7528	46.5667	45.236	ARSD	arylsulfatase D
ENSG00000229851	0.085419	0.052758	0.313229	0.142208	0.22338	0.317301	0.140981	0.212605	0.095407	0.249725	0.205339	0.058818	0.045688	0.151162	0.085175	0.244816	0.137823	0.104883	ARSD-AS1	ARSD antisense RNA 1
ENSG00000141337	17.7233	20.8346	21.6214	10.8578	13.8157	13.2109	20.8053	18.4077	18.2942	10.7705	13.8457	11.6741	14.1044	16.4892	17.2648	9.54497	11.9778	11.0196	ARSG	arylsulfatase G
ENSG00000180801	0.481448	0.289089	0.454424	1.07932	1.18846	1.63232	0.585983	0.280474	0.468727	1.69063	1.8143	1.62551	0.571426	0.48766	0.623499	2.9468	2.09768	1.97552	ARSJ	arylsulfatase family member J
ENSG00000164291	6.71638	7.94926	7.97071	10.0557	9.33188	8.85517	7.17533	7.20827	5.45532	10.0276	9.27047	8.49748	6.34099	6.91743	7.70363	10.4331	9.38256	9.98364	ARSK	arylsulfatase family member K
ENSG00000167311	1.48991	1.24674	0.948584	0.841941	0.75038	0.753524	1.03913	1.28881	1.01597	0.599523	0.896203	0.724279	0.693052	0.802769	0.861536	0.705092	0.69556	0.627142	ART5	ADP-ribosyltransferase 5
ENSG00000117407	22.16	18.8651	20.0719	6.43666	5.05206	5.48798	21.8785	22.771	22.3875	4.16475	5.97167	4.88778	21.1281	17.7713	20.8141	4.63597	5.83725	5.15441	ARTN	artemin
ENSG00000173409	40.4562	46.4511	40.7551	53.0684	52.7096	54.2322	46.1835	43.2096	33.5771	42.7009	48.5426	48.3465	45.2004	39.3767	37.1206	44.8114	44.3093	46.9463	ARV1	ARV1 homolog, fatty acid homeostasis modulator
ENSG00000099889	9.3	7.83439	8.24723	17.3674	19.2776	20.0031	6.2325	8.05373	8.6325	14.7655	16.7476	16.0942	7.86858	7.36109	8.65907	20.2815	21.5189	21.6358	ARVCF	ARVCF delta catenin family member
ENSG00000004848	0.371219	1.93414	0.302291	0.602219	0.409411	0.556053	0.387775	0.319875	0.31825	2.15204	0.562396	0.573282	0.512594	1.44118	1.47107	0.657876	2.74155	0.736667	ARX	aristaless related homeobox
ENSG00000214435	46.8013	53.0429	48.2042	34.0782	32.9618	35.4576	44.5262	45.2564	41.9597	32.2061	32.7372	33.6337	40.3347	40.8674	38.5825	30.4344	30.7419	29.7445	AS3MT	arsenite methyltransferase
ENSG00000104763	109.738	139.375	129.808	264.131	200.223	208.817	134.402	127.934	114.959	273.05	257.941	213.521	135.65	141.947	112.414	285.698	280.729	240.29	ASAH1	N-acylsphingosine amidohydrolase 1
ENSG00000188611	2.30655	0.753397	0.455705	2.21994	1.78932	0.416876	1.10173	0.889225	2.38244	0.444331	2.19132	0.516995	0.483868	1.71379	0.637489	1.88584	1.65364	0.357149	ASAH2	N-acylsphingosine amidohydrolase 2
ENSG00000204147	6.95197	8.93678	7.40377	7.01729	6.72974	6.99484	9.48155	10.6361	6.46849	9.65563	6.68992	6.07299	5.83074	5.97913	5.9219	6.79226	7.45857	7.47796	ASAH2B	N-acylsphingosine amidohydrolase 2B
ENSG00000153317	12.1519	12.3216	13.6217	40.7772	39.5623	40.8396	14.0302	13.2957	11.0892	38.4409	38.7305	29.5261	11.5518	14.651	15.5195	39.0262	43.8927	37.8037	ASAP1	ArfGAP with SH3 domain, ankyrin repeat and PH domain 1
ENSG00000151693	11.7379	12.381	14.096	12.0547	11.5327	12.6358	11.3872	11.4544	10.5133	11.6687	12.0225	10.8304	8.03703	8.9023	8.90677	8.90779	9.06299	9.41788	ASAP2	ArfGAP with SH3 domain, ankyrin repeat and PH domain 2
ENSG00000088280	28.8229	26.2947	26.0375	37.9035	38.6155	39.0263	24.2209	24.2002	27.4284	33.9768	31.2372	34.267	29.3828	33.3469	32.5954	34.5301	42.0668	40.2146	ASAP3	ArfGAP with SH3 domain, ankyrin repeat and PH domain 3
ENSG00000065802	14.3291	12.3861	12.9431	8.9359	9.85873	10.9595	12.5006	16.8367	18.5172	11.7148	11.9128	13.6573	10.4487	12.2172	11.7036	9.51657	11.6375	9.4922	ASB1	ankyrin repeat and SOCS box containing 1
ENSG00000196372	29.789	28.4483	29.1991	12.039	12.4281	13.6297	22.8625	23.9653	26.9955	11.4181	12.8557	13.29	24.9357	24.0119	23.5158	13.3973	14.5835	13.8075	ASB13	ankyrin repeat and SOCS box containing 13
ENSG00000267080	12.8536	10.9438	10.6482	13.6834	13.9823	13.8122	10.1195	10.4727	10.0484	9.83247	13.9929	11.7535	9.44605	8.5644	9.79739	9.07738	11.2199	11.7132	ASB16-AS1	ASB16 antisense RNA 1
ENSG00000115239	7.24321	7.06423	7.56557	7.3446	6.97354	7.39837	6.67128	6.72409	5.81626	7.62142	6.89254	6.79635	5.40795	5.3107	5.19907	7.47842	7.27567	7.32052	ASB3	ankyrin repeat and SOCS box containing 3
ENSG00000005981	0.061411	0.024813	0	0.008439	0.228516	0.231507	0.221421	0.268007	0	0.221047	0.037052	0.115516	0.093213	0.034856	0	0.599956	0.436613	0.184364	ASB4	ankyrin repeat and SOCS box containing 4
ENSG00000148331	20.33	20.1287	20.2018	20.1656	22.1136	22.8902	23.295	22.0208	23.97	22.5297	22.8213	22.7334	17.2076	16.5643	16.5741	19.4804	21.3513	19.9586	ASB6	ankyrin repeat and SOCS box containing 6
ENSG00000183475	7.39633	8.36671	8.35954	11.044	12.5106	11.4724	8.36323	8.66885	7.84286	12.0071	11.1146	10.7245	6.89868	7.842	8.22181	12.1487	12.0151	12.1601	ASB7	ankyrin repeat and SOCS box containing 7
ENSG00000177981	41.2057	39.4202	38.8598	47.4032	49.6627	50.0506	48.3783	40.3762	42.0268	56.2562	51.8549	48.6789	40.2021	42.9435	46.8885	50.7887	59.1446	54.8082	ASB8	ankyrin repeat and SOCS box containing 8
ENSG00000102048	0.668543	0.683094	0.524658	0.503582	0.451458	0.621263	0.803729	0.821891	0.710377	0.621297	0.942358	0.975107	0.302355	0.244954	0.167054	0.406659	0.563293	0.90431	ASB9	ankyrin repeat and SOCS box containing 9
ENSG00000138303	20.8002	23.023	21.5615	18.8508	19.6102	17.5603	21.4936	23.0754	21.17	19.3767	18.8182	19.7038	19.3797	19.8128	21.1835	20.8421	18.3718	21.545	ASCC1	activating signal cointegrator 1 complex subunit 1
ENSG00000100325	32.2321	30.9954	34.0552	37.6651	39.3684	41.98	35.9629	36.7483	37.4603	41.8575	42.7763	38.463	30.0176	32.4508	34.2367	37.667	41.3694	42.0691	ASCC2	activating signal cointegrator 1 complex subunit 2
ENSG00000112249	13.639	14.3875	15.8304	15.3987	14.3607	14.5285	15.3926	14.5742	11.202	15.9312	15.129	12.7914	13.533	14.5389	16.364	15.7972	15.3919	15.1065	ASCC3	activating signal cointegrator 1 complex subunit 3
ENSG00000183734	6.27444	6.07795	6.02749	4.22475	5.34484	5.27344	5.35142	6.36237	6.61121	3.53064	3.45906	3.95469	3.35569	3.75721	3.4775	3.53153	3.38918	3.70995	ASCL2	achaete-scute family bHLH transcription factor 2
ENSG00000286053	7.51106	14.5671	18.3083	7.68855	0	8.39035	12.3013	8.36278	0.17554	14.7593	8.63211	6.59317	5.28789	15.4421	14.1491	7.78032	10.2075	5.0669	ASDURF	ASNSD1 upstream reading frame
ENSG00000111875	11.6741	13.1358	12.4231	14.6827	12.4009	13.2617	13.7206	13.246	11.8573	13.8209	12.0911	13.396	11.9385	11.3406	11.8354	13.8739	13.7529	12.4245	ASF1A	anti-silencing function 1A histone chaperone
ENSG00000105011	42.1444	45.0004	46.5035	16.3647	17.9432	19.0019	40.0241	41.4355	47.3937	16.2736	16.4332	15.9982	34.7647	34.9809	34.1394	13.672	14.9371	13.4364	ASF1B	anti-silencing function 1B histone chaperone
ENSG00000141505	0.25587	0.27859	0.271639	0.084011	0.311863	0.095691	0.198595	0.116673	0.40827	0.109453	0.149924	0.088349	0.481375	0.22089	0.239468	0.117371	0.522203	0.368825	ASGR1	asialoglycoprotein receptor 1
ENSG00000116539	13.959	14.4806	16.1785	18.668	19.4429	19.8061	16.2613	14.8974	13.8112	22.4669	21.1994	14.0196	10.4664	14.0529	17.1062	22.681	22.8163	20.8634	ASH1L	ASH1 like histone lysine methyltransferase
ENSG00000235919	4.39587	5.21919	5.27325	7.37053	6.24392	6.45969	4.66661	5.07156	3.64019	5.84088	5.77327	6.14165	6.33472	4.443	4.98565	6.36839	5.76877	4.8321	ASH1L-AS1	ASH1L antisense RNA 1
ENSG00000129691	22.6189	25.6779	27.9165	28.5331	25.6352	26.1196	27.5926	26.1696	26.7579	27.279	27.0204	25.8329	30.7032	27.0693	26.8267	27.1521	25.1498	28.3175	ASH2L	ASH2 like, histone lysine methyltransferase complex subunit
ENSG00000110881	13.3037	12.9525	11.8196	6.10716	6.5531	7.04744	12.4516	12.556	11.3791	6.68774	7.06445	6.33508	9.20544	9.83003	11.7352	6.6667	7.02365	6.46287	ASIC1	acid sensing ion channel subunit 1
ENSG00000213199	2.96848	1.70158	1.91083	1.90863	2.77974	2.09587	2.08298	2.21705	0.997581	1.95792	1.84769	1.9532	0.952464	0.760264	1.50226	1.44472	2.26386	1.86085	ASIC3	acid sensing ion channel subunit 3
ENSG00000126522	51.9279	49.5557	49.5175	72.7713	76.0074	78.583	48.1676	48.6818	57.2881	57.1914	59.8153	60.9424	58.8968	54.8253	52.2723	65.8536	71.4406	68.6161	ASL	argininosuccinate lyase
ENSG00000169093	10.9416	9.69463	9.58221	14.7675	16.6762	15.9964	8.89597	8.66878	12.6008	13.9064	13.135	14.8107	8.47817	8.34425	8.35377	13.5927	13.842	14.0119	ASMTL	acetylserotonin O-methyltransferase like
ENSG00000070669	19.8987	26.6496	27.183	16.0825	16.4776	15.0231	27.7645	25.0013	25.4416	16.8973	17.2805	15.9114	32.6437	36.1684	36.8807	16.5272	21.7393	16.6011	ASNS	asparagine synthetase (glutamine-hydrolyzing)
ENSG00000138381	40.6162	43.1558	42.3132	40.1336	43.5367	40.9642	45.6836	48.1697	49.7046	39.8926	36.7609	33.8606	42.5445	39.7484	42.5162	39.3383	36.073	38.3954	ASNSD1	asparagine synthetase domain containing 1
ENSG00000248498	0.974378	1.38005	1.16995	0.219437	0.46441	0.540648	0.786954	0.97895	0.505934	0.619974	0.635762	0.583893	1.69548	1.10304	1.45905	0.704157	0.975348	0.747649	ASNSP1	asparagine synthetase pseudogene 1
ENSG00000198363	44.8378	55.1424	53.8541	36.7497	36.6999	39.2578	59.4373	56.1983	39.7643	47.4573	49.5959	44.1599	43.8805	45.3029	44.5978	48.134	51.4883	47.957	ASPH	aspartate beta-hydroxylase
ENSG00000174939	19.6955	18.4006	18.2058	11.7114	10.8334	9.88605	22.5151	23.2912	24.4135	9.16151	10.9673	13.9055	17.7956	15.8021	15.7351	10.1873	12.3917	10.419	ASPHD1	aspartate beta-hydroxylase domain containing 1
ENSG00000128203	0.233187	0.200613	0.338511	0.168731	0.16494	0.192195	0.189811	0.258245	0.104638	0.090503	0.149665	0.110348	0.30593	0.341492	0.274838	0.178661	0.214802	0.132573	ASPHD2	aspartate beta-hydroxylase domain containing 2
ENSG00000066279	23.425	25.7138	28.6793	21.5644	20.5089	21.373	24.1918	23.8115	14.2568	21.0539	21.4135	18.2052	23.1165	25.2417	28.3991	25.6675	27.505	22.3308	ASPM	abnormal spindle microtubule assembly
ENSG00000106819	0	0	0	0.072454	0	0.061576	0	0	0.188388	0	0	0.10546	0	0	0.020392	0	0	5.45117	ASPN	asporin
ENSG00000169696	35.3898	31.1327	33.1695	43.0229	49.3433	45.5421	32.1239	35.5247	37.992	41.7533	41.7624	48.6185	35.185	33.9286	31.1891	44.5867	42.7849	45.0076	ASPSCR1	ASPSCR1 tether for SLC2A4, UBX domain containing
ENSG00000162174	6.31706	6.9163	8.33363	5.09402	5.43033	4.37043	7.68616	8.19705	9.49596	3.30669	4.72154	3.37815	3.49731	3.33175	2.29244	3.19856	2.80626	2.08433	ASRGL1	asparaginase and isoaspartyl peptidase 1
ENSG00000130707	254.887	251.706	238.17	128.673	145.539	145.559	157.304	157.532	177.441	101.572	97.4499	105.829	176.655	169.225	170.647	91.7511	93.3767	99.6064	ASS1	argininosuccinate synthase 1
ENSG00000034533	5.98099	6.19336	6.61018	6.38577	5.61827	5.55238	6.4532	5.94894	4.98848	6.30538	5.54806	5.78138	5.50869	5.99565	6.08748	6.3106	6.28751	5.87677	ASTE1	asteroid homolog 1
ENSG00000188886	0.129798	0.191624	0.463066	0.085384	0.082487	0.064233	0.256461	0.431827	0.427378	0.184978	0.121775	0.140772	0.161457	0.425812	0.053045	0.110106	0.081598	0.073861	ASTL	astacin like metalloendopeptidase
ENSG00000148219	16.5869	17.2283	16.7045	16.9859	16.7624	17.9256	15.5234	14.9671	16.0103	16.3865	16.8578	15.9242	16.5001	16.5825	16.1037	18.0008	17.9239	17.1717	ASTN2	astrotactin 2
ENSG00000171456	33.6809	33.4447	32.3572	33.026	35.0385	37.1017	35.3022	35.2228	31.1374	38.6735	42.5783	33.9184	26.0932	31.9609	36.0908	38.0516	42.9993	40.218	ASXL1	ASXL transcriptional regulator 1
ENSG00000143970	5.72009	6.52616	7.41029	7.69344	7.09651	7.82192	7.00823	6.89144	5.25071	9.08802	8.11376	6.25581	4.31859	6.11622	7.30494	8.61733	9.26833	8.33487	ASXL2	ASXL transcriptional regulator 2
ENSG00000138138	57.4171	61.7099	62.6493	52.9717	51.498	50.8997	65.1185	63.4333	54.1384	61.2621	55.9963	52.4824	52.5953	56.9412	57.3926	53.83	57.0914	54.1342	ATAD1	ATPase family AAA domain containing 1
ENSG00000156802	75.0032	86.2487	92.0452	44.4354	42.8272	45.1131	82.3184	81.6395	68.5521	44.8833	44.6983	40.6564	57.752	65.6432	69.5674	42.2598	41.312	39.2171	ATAD2	ATPase family AAA domain containing 2
ENSG00000119778	3.62404	4.26973	4.28006	3.97104	4.05921	4.5251	4.75254	4.25936	2.90433	4.31926	4.53575	3.37836	3.2237	3.39179	4.06037	4.88651	4.20115	4.2355	ATAD2B	ATPase family AAA domain containing 2B
ENSG00000197785	30.5331	25.655	29.9424	16.8377	17.6199	18.6028	27.0432	27.8744	32.2662	15.8533	17.2145	18.6441	25.1472	24.0243	22.0453	13.964	15.5502	15.8217	ATAD3A	ATPase family AAA domain containing 3A
ENSG00000160072	16.9418	10.7003	9.20971	11.4698	11.9585	10.9936	13.2376	12.7617	13.3421	10.0632	12.4276	9.29569	5.9235	3.49763	6.82572	10.1761	9.53054	10.9401	ATAD3B	ATPase family AAA domain containing 3B
ENSG00000215915	1.18061	1.00344	0.319995	1.21684	1.55636	1.6817	0.535789	0.962851	0.485859	0.421742	1.46737	0.878507	0.821169	0.353762	1.06063	0.885916	1.19489	1.52517	ATAD3C	ATPase family AAA domain containing 3C
ENSG00000176208	5.59883	6.62867	6.48371	2.64432	2.78164	2.91984	5.60281	5.80246	4.07219	2.73793	2.91337	2.51988	3.38074	3.57467	4.69045	2.62278	2.33773	2.2856	ATAD5	ATPase family AAA domain containing 5
ENSG00000137343	11.5053	9.54755	10.0425	13.8188	12.791	14.8957	12.6787	10.8739	11.1849	12.9137	13.369	12.4056	7.45874	7.39221	8.26	11.4145	10.6386	10.9323	ATAT1	alpha tubulin acetyltransferase 1
ENSG00000107669	12.4874	10.4777	15.6094	12.6196	13.4222	10.6377	13.6171	12.8237	12.7849	14.9575	14.827	13.274	9.73046	10.2189	13.0819	14.1362	16.4334	13.4109	ATE1	arginyltransferase 1
ENSG00000226864	0.11743	0.094497	0.275908	0.988962	0.880395	0.847317	0.556966	0.357033	0.295527	1.37125	0.801785	1.28469	0.245902	0.593489	0.717416	0.993456	0.921207	1.41913	ATE1-AS1	ATE1 antisense RNA 1
ENSG00000123268	27.4429	28.8889	29.4073	27.0221	29.012	26.1609	29.8422	26.9164	27.85	29.6568	27.2594	26.9485	22.6652	25.7405	27.2107	28.1746	28.1252	29.0476	ATF1	activating transcription factor 1
ENSG00000115966	14.6697	16.787	17.1865	22.3448	19.5701	21.0465	15.4555	15.9012	13.0285	21.8234	20.3298	19.1704	14.0831	15.3733	17.8089	22.6795	22.7446	23.0653	ATF2	activating transcription factor 2
ENSG00000162772	22.3498	25.9694	24.4926	47.2897	47.8273	47.0811	20.6418	17.4802	17.9347	50.9294	44.9594	36.9798	15.0244	15.8551	19.5209	52.2279	56.2607	50.4894	ATF3	activating transcription factor 3
ENSG00000128272	212.74	222.806	232.404	185.488	190.089	192.523	198.997	202.246	206.066	164.6	177.504	177.776	185.619	176.445	170.254	184.654	190.57	196.343	ATF4	activating transcription factor 4
ENSG00000169136	38.6595	36.9949	37.2281	62.395	73.667	70.8053	37.0895	37.3512	41.8327	65.0851	65.6764	65.6243	36.4359	39.4301	38.1127	64.5652	67.5927	68.494	ATF5	activating transcription factor 5
ENSG00000118217	20.5636	21.3552	21.1321	29.3179	30.5678	29.534	20.3983	20.4173	20.712	30.2398	28.4437	26.943	18.0386	21.0196	21.9457	31.0935	30.6397	30.1548	ATF6	activating transcription factor 6
ENSG00000213676	93.3395	84.9104	88.7964	111.306	117.515	125.016	90.3045	86.2381	94.9535	105.69	113.965	96.7354	74.0656	74.9097	76.8028	98.8523	109.471	110.635	ATF6B	activating transcription factor 6 beta
ENSG00000170653	23.7643	26.7311	26.393	31.3178	34.6479	33.9275	26.8033	25.7553	26.1761	31.3759	32.1926	31.39	23.5169	26.2037	28.3098	36.1484	34.8626	33.1751	ATF7	activating transcription factor 7
ENSG00000171681	12.4753	11.6538	13.1654	10.1182	10.9805	11.4436	11.4145	11.1558	14.8742	13.2554	11.5005	8.85523	7.40516	9.91167	14.2413	11.1963	13.5874	10.7244	ATF7IP	activating transcription factor 7 interacting protein
ENSG00000166669	11.7805	13.0888	10.7717	13.0487	13.1123	14.1204	12.7736	10.0467	6.96917	10.4915	9.67165	9.26268	12.3973	9.89659	9.30378	11.1434	13.8123	11.6578	ATF7IP2	activating transcription factor 7 interacting protein 2
ENSG00000152348	9.3289	10.6501	12.2377	10.2963	9.99597	9.44357	9.03389	9.08669	8.14088	10.7865	11.0731	9.88195	12.0898	13.2638	12.5735	11.8905	13.68	11.6878	ATG10	autophagy related 10
ENSG00000123395	72.1214	74.3143	72.9313	84.0371	89.9647	88.5066	74.2302	77.9184	92.3738	90.5118	86.4804	99.401	80.9694	76.2077	72.0509	84.3121	88.1869	90.8087	ATG101	autophagy related 101
ENSG00000145782	42.0279	56.5309	55.2505	55.9992	44.9712	51.5864	54.5559	54.2883	32.8342	50.5017	51.1763	46.9635	48.4313	42.5649	44.586	52.7555	49.5147	52.4355	ATG12	autophagy related 12
ENSG00000175224	52.086	53.2374	57.833	70.2972	72.8179	73.6854	56.8805	58.8979	62.7689	71.0436	69.9255	60.0776	47.9979	54.9606	53.6842	66.0837	67.7475	63.4	ATG13	autophagy related 13
ENSG00000126775	6.13288	7.28383	7.43645	12.4708	12.1361	11.8693	7.88741	7.04944	5.54992	12.9061	13.2768	11.454	5.74089	5.92033	6.66159	14.9209	14.0577	13.3112	ATG14	autophagy related 14
ENSG00000085978	11.3925	11.2862	12.1991	19.8996	21.1653	20.5061	12.7431	11.1324	11.0831	21.1895	19.2815	17.1575	9.95806	9.98891	10.6419	18.9337	23.102	19.0909	ATG16L1	autophagy related 16 like 1
ENSG00000168010	6.03036	4.11671	4.57737	6.14427	6.01199	6.58661	5.52175	4.61512	3.65278	5.57224	8.41951	6.04202	1.72935	2.16072	2.61507	4.25813	5.02022	4.70178	ATG16L2	autophagy related 16 like 2
ENSG00000110046	15.1554	12.6063	14.6419	16.9271	18.6291	20.2283	14.3084	15.1308	16.3565	16.8857	17.3865	19.3754	15.3416	15.3226	15.8803	17.2575	18.4251	17.2993	ATG2A	autophagy related 2A
ENSG00000066739	10.0599	9.62424	11.6792	16.9326	16.393	15.7775	11.5265	10.5902	9.22036	20.9504	18.1979	13.1071	7.19011	9.52873	10.8521	20.8372	20.1179	20.7518	ATG2B	autophagy related 2B
ENSG00000144848	74.544	88.32	88.8257	84.3694	73.1185	73.8639	84.1396	83.7571	78.2936	79.5129	79.5657	79.1736	88.8829	86.0651	80.126	86.7303	83.7255	84.4022	ATG3	autophagy related 3
ENSG00000101844	8.32742	9.36388	9.75755	15.4809	14.2933	15.0684	9.79543	8.68319	8.47904	14.055	14.2879	14.279	8.75294	9.45692	8.71196	13.5245	14.5092	14.428	ATG4A	autophagy related 4A cysteine peptidase
ENSG00000168397	46.5087	45.0599	42.9885	38.7678	40.218	44.9269	43.9738	41.205	42.7554	34.6201	40.4392	33.0634	32.3209	26.6045	35.705	40.8525	36.3323	40.283	ATG4B	autophagy related 4B cysteine peptidase
ENSG00000125703	6.41973	8.30924	7.84379	9.34819	8.45428	7.75388	8.23105	8.00166	6.18113	8.31082	8.11322	10.3221	6.89042	6.86223	7.47377	10.588	9.66133	9.38321	ATG4C	autophagy related 4C cysteine peptidase
ENSG00000130734	22.7434	20.5133	21.2532	20.2625	22.5343	23.918	15.9186	18.2574	20.0111	17.9511	18.0035	17.4111	20.3606	19.2598	20.2025	19.919	21.2978	19.9528	ATG4D	autophagy related 4D cysteine peptidase
ENSG00000057663	18.651	27.4482	20.929	28.2783	26.6184	24.3031	23.2813	25.8229	17.3274	27.7914	24.3871	24.5519	21.9589	23.7086	23.2633	30.527	31.0156	27.5421	ATG5	autophagy related 5
ENSG00000197548	25.8216	26.2432	31.6267	33.4158	33.9294	30.9608	29.5249	28.9975	28.9984	32.7777	31.8018	30.0419	27.6429	27.1858	28.7037	30.1511	32.6244	30.8344	ATG7	autophagy related 7
ENSG00000198925	23.0251	20.8902	23.7746	24.5812	28.068	28.2511	20.3534	25.4263	25.463	28.1565	24.9057	22.923	21.951	25.6483	25.8087	28.162	25.3911	24.5922	ATG9A	autophagy related 9A
ENSG00000181652	1.00246	0.734552	0.330431	0.549437	0.884966	1.11436	0.702401	0.32666	0.387726	0.544514	1.17891	0.674511	0.344804	0.167474	0.214898	0.711504	0.623061	0.466214	ATG9B	autophagy related 9B
ENSG00000138363	156.518	156.298	155.968	153.857	153.511	148.064	157.549	161.927	158.419	162.641	150.778	164.752	140.637	140.196	133.274	151.029	142.109	136.832	ATIC	5-aminoimidazole-4-carboxamide ribonucleotide formyltransferase/IMP cyclohydrolase
ENSG00000198513	0.441734	0.581961	0.480942	0.957283	1.08463	1.45592	0.354647	0.357493	0.401313	0.94295	1.01284	1.42816	0.606936	0.235273	0.558684	1.41419	1.22102	1.35791	ATL1	atlastin GTPase 1
ENSG00000119787	29.4571	38.3916	37.1529	26.1742	23.5208	30.0601	34.1792	36.1403	23.8074	30.8712	26.8448	25.6317	23.0194	24.911	28.2683	32.8448	30.2515	25.0445	ATL2	atlastin GTPase 2
ENSG00000184743	67.261	70.7732	82.5815	61.1482	57.728	62.8105	68.9371	73.6831	69.1041	64.9146	59.3187	57.6879	53.8935	58.4751	72.7492	59.8107	64.2388	61.6665	ATL3	atlastin GTPase 3
ENSG00000149311	18.5193	19.7187	16.7562	17.7472	17.7268	20.9579	17.4585	17.8781	13.3625	19.2191	19.2602	14.6073	11.3824	9.07297	12.9594	16.0785	17.3172	19.9873	ATM	ATM serine/threonine kinase
ENSG00000166454	41.1915	47.5933	46.3327	56.2976	52.334	52.652	53.3466	50.3894	43.0381	58.4549	56.5745	52.9496	42.4969	46.3635	48.0172	56.0839	59.2179	54.3921	ATMIN	ATM interactor
ENSG00000111676	19.6102	17.9584	20.1115	24.8767	24.543	24.0578	19.1003	19.4184	22.5861	23.4482	25.4025	20.5561	18.0094	19.3718	20.1769	21.5096	21.6191	22.4929	ATN1	atrophin 1
ENSG00000177556	290.646	313.198	290.615	211.246	226.769	217.36	260.319	276.131	310.235	182.443	189.718	208.746	310.538	285.594	263.211	199.43	208.794	190.962	ATOX1	antioxidant 1 copper chaperone
ENSG00000206190	7.83401	7.0463	8.03196	3.60561	3.81036	3.6058	6.56383	6.12878	6.08845	3.24262	3.82188	2.98638	4.57123	4.51166	5.79525	3.10465	3.22756	3.25225	ATP10A	ATPase phospholipid transporting 10A (putative)
ENSG00000118322	0.830365	0.884866	0.840366	2.44201	2.64996	3.00364	0.934396	0.90557	0.825369	3.47811	3.37411	2.58615	1.03058	1.23488	1.37526	3.17072	3.8559	3.61255	ATP10B	ATPase phospholipid transporting 10B (putative)
ENSG00000145246	2.91239	3.88426	4.64877	5.30076	5.01907	5.22644	3.7246	3.01793	3.26136	5.80578	5.06701	5.30953	3.21625	2.99446	3.68974	5.52014	5.84093	5.6127	ATP10D	ATPase phospholipid transporting 10D (putative)
ENSG00000068650	5.04164	4.96005	5.26158	2.0922	2.436	2.70099	4.58314	4.43041	4.51168	3.92624	5.85141	2.76477	1.28245	2.39547	2.40164	1.75126	2.31237	1.65576	ATP11A	ATPase phospholipid transporting 11A
ENSG00000058063	13.8619	17.1311	18.4205	23.0857	22.991	27.5907	15.3778	14.0464	13.9798	26.6557	27.6506	17.8117	12.5901	15.8077	20.7212	23.6447	22.8853	21.4164	ATP11B	ATPase phospholipid transporting 11B (putative)
ENSG00000101974	4.12492	5.48188	5.10613	2.73726	2.34995	2.59284	5.61755	4.45853	2.90506	3.77357	2.99463	3.35485	3.9416	3.52031	3.78809	3.43311	3.5147	3.31897	ATP11C	ATPase phospholipid transporting 11C
ENSG00000105726	26.1984	23.0756	22.7871	20.4097	22.61	27.3012	30.9454	27.7458	30.6298	22.5585	26.361	20.4679	15.7831	16.8156	19.3996	18.394	22.4538	20.0182	ATP13A1	ATPase 13A1
ENSG00000159363	33.566	30.8635	33.4537	31.9425	31.3685	29.2865	30.2494	31.4738	37.7323	30.7783	28.3153	26.1251	33.3443	41.2081	37.8292	28.763	28.5087	27.6211	ATP13A2	ATPase cation transporting 13A2
ENSG00000133657	121.044	142.993	164.509	155.85	167.448	166.73	131.007	133.483	89.8814	168.021	151.643	124.292	99.4987	116.674	144.765	181.705	197.007	174.914	ATP13A3	ATPase 13A3
ENSG00000127249	0.180343	0.965353	0.425018	2.44319	2.6953	3.36703	0.569353	0.583305	0.246689	5.26545	4.00584	3.57831	0.594907	0.552494	0.760594	4.3158	3.56936	3.56691	ATP13A4	ATPase 13A4
ENSG00000163399	124.72	124.194	133.75	139.084	146.618	148.878	125.301	126.548	128.634	133.456	141.864	128.461	125.914	142.934	148.316	146.918	157.359	145.745	ATP1A1	ATPase Na+/K+ transporting subunit alpha 1
ENSG00000203865	2.39813	2.65176	2.49614	4.61672	3.87273	4.39519	3.44876	2.96965	2.75976	4.5524	4.46044	4.70298	3.45587	3.36	3.39658	4.684	3.40133	3.69223	ATP1A1-AS1	ATP1A1 antisense RNA 1
ENSG00000105409	6.52305	5.25911	6.62616	3.78017	3.73871	4.09391	8.08606	9.07808	10.3052	4.03437	4.60936	3.83545	6.64463	6.82938	7.50326	3.53474	3.91876	3.46177	ATP1A3	ATPase Na+/K+ transporting subunit alpha 3
ENSG00000132681	0.510652	0.442415	0.494675	2.79269	2.12585	2.61681	0.401447	0.390111	0.416269	1.7157	2.52473	1.45315	0.097324	0.051574	0.06152	1.025	1.02998	1.23179	ATP1A4	ATPase Na+/K+ transporting subunit alpha 4
ENSG00000143153	42.7948	48.9299	50.8055	113.483	112.437	116.283	64.9712	62.5277	56.5924	134.83	136.762	130.593	72.239	74.0264	76.7996	128.313	131.638	125.255	ATP1B1	ATPase Na+/K+ transporting subunit beta 1
ENSG00000069849	138.122	151.736	150.687	144.112	147.591	140.016	141.384	148.997	137.771	150.965	143.812	154.919	148.95	147.565	147.172	157.719	161.693	162.623	ATP1B3	ATPase Na+/K+ transporting subunit beta 3
ENSG00000166896	33.8204	34.5767	35.939	24.7287	24.9893	25.4697	31.4929	31.3382	29.4404	20.5278	23.839	27.6993	30.2874	29.996	29.9488	26.7403	23.6248	26.1532	ATP23	ATP23 metallopeptidase and ATP synthase assembly factor homolog
ENSG00000196296	0.586782	0.207317	0.600913	0.358572	0.164325	0.36775	0.386784	0.599603	0.64566	0.671215	0.482119	0.730859	0.097333	0.954214	0.172886	0.196929	0.894144	0.387708	ATP2A1	ATPase sarcoplasmic/endoplasmic reticulum Ca2+ transporting 1
ENSG00000260442	6.36975	7.20041	6.40938	2.92873	4.65029	4.06547	5.55087	5.05279	7.33417	5.13906	4.34217	3.88435	3.11952	3.87632	3.78498	2.80364	2.52338	2.56329	ATP2A1-AS1	ATP2A1 antisense RNA 1
ENSG00000174437	215.606	214.54	239.829	256.005	268.146	270.906	230.813	237.131	229.956	298.447	300.435	258.894	187.029	221.171	241.367	278.128	296.841	277.875	ATP2A2	ATPase sarcoplasmic/endoplasmic reticulum Ca2+ transporting 2
ENSG00000074370	13.1867	11.8652	13.199	82.2187	84.9658	85.4923	13.6642	15.1442	16.8289	55.3085	54.3733	53.231	15.9788	16.6399	17.5325	58.4698	58.9795	64.4597	ATP2A3	ATPase sarcoplasmic/endoplasmic reticulum Ca2+ transporting 3
ENSG00000070961	21.0935	21.5953	24.9722	46.0181	44.7772	44.3588	25.1379	23.5823	25.5866	49.2701	53.7037	46.0572	22.3454	26.4028	27.1771	48.18	55.935	49.9633	ATP2B1	ATPase plasma membrane Ca2+ transporting 1
ENSG00000271614	0.185239	0.208225	0.26051	1.4759	1.39292	1.51894	0.319858	0.323634	0.254967	1.65826	1.33632	1.50229	0.41881	0.548695	0.34346	1.96756	2.27411	1.87988	ATP2B1-AS1	ATP2B1 antisense RNA 1
ENSG00000058668	8.59537	8.73817	10.2726	14.27	12.7822	13.9521	6.61311	6.55485	5.88734	10.5368	10.812	10.1072	12.0384	13.3523	14.3024	17.6456	17.5911	16.5454	ATP2B4	ATPase plasma membrane Ca2+ transporting 4
ENSG00000017260	59.5175	62.7216	63.2707	81.8839	74.412	78.7778	67.3886	66.0682	46.114	79.0503	84.8807	79.4106	62.2999	61.0988	64.2365	86.1427	78.993	84.9569	ATP2C1	ATPase secretory pathway Ca2+ transporting 1
ENSG00000064270	8.92126	10.3834	10.2304	6.38231	6.77069	6.53615	8.68368	6.81935	9.0234	4.96432	7.58802	5.23862	8.46447	6.5302	6.68384	5.98445	6.74663	5.74709	ATP2C2	ATPase secretory pathway Ca2+ transporting 2
ENSG00000261286	0.418537	0.399907	0.377588	0.458099	0.679486	0.386904	0.414039	0.379181	0.389153	0.465458	0.503335	0.605577	0.296655	0.203322	0.206886	0.487328	0.687063	0.532608	ATP2C2-AS1	ATP2C2 antisense RNA 1
ENSG00000152234	448.824	479.846	488.148	344.958	343.927	348.515	447.468	461.209	439.058	328.452	332.695	346.544	435.056	424.327	400.201	341.967	339.53	327.107	ATP5F1A	ATP synthase F1 subunit alpha
ENSG00000110955	1372.34	1453.59	1425.03	864.258	876.718	871.746	1449.48	1500.07	1488.2	885.137	881.066	912.673	1341.08	1340.96	1284.76	843.237	861.485	847.52	ATP5F1B	ATP synthase F1 subunit beta
ENSG00000165629	487.868	526.878	511.152	417.715	416.411	411.575	491.839	491.805	417.106	392.652	386.795	405.57	451.515	461.106	422.737	409.241	406.426	391.967	ATP5F1C	ATP synthase F1 subunit gamma
ENSG00000099624	167.148	156.701	166.653	94.6451	105.875	102.873	148.633	165.963	201.567	88.2561	85.1549	108.146	163.86	145.627	137.741	76.657	91.1011	91.958	ATP5F1D	ATP synthase F1 subunit delta
ENSG00000124172	237.955	169.682	161.119	143.895	195.303	160.164	162.701	153.154	472.973	134.144	125.59	153.025	181.815	183.745	173.092	147.572	125.545	156.927	ATP5F1E	ATP synthase F1 subunit epsilon
ENSG00000130770	422.033	442.703	430.988	442.909	438.765	434.475	422.519	415.912	417.832	382.726	400.576	424.896	467.474	417.017	372.284	381.722	367.495	358.165	ATP5IF1	ATP synthase inhibitory factor subunit 1
ENSG00000159199	560.269	574.757	553.016	340.31	345.851	335.895	536.019	547.157	560.582	284.542	315.351	326.842	542.814	479.25	442.446	283.711	310.654	312.743	ATP5MC1	ATP synthase membrane subunit c locus 1
ENSG00000135390	850.02	871.151	855.556	752.551	828.621	782.064	796.593	825.95	935.651	642.928	665.034	735.278	931.486	841.317	815.237	657.793	691.663	689.126	ATP5MC2	ATP synthase membrane subunit c locus 2
ENSG00000154518	403.509	403.708	405.301	283.505	301.924	298.635	373.187	384.367	443.114	265.937	276.116	286.198	399.144	357.857	338.452	282.497	289.943	279.966	ATP5MC3	ATP synthase membrane subunit c locus 3
ENSG00000173915	319.013	402.319	385.287	315.715	295.1	294.422	399.769	392.047	145.982	327.42	321.767	327.687	396.138	371.549	341.426	324.916	307.08	305.546	ATP5MD	ATP synthase membrane subunit DAPIT
ENSG00000169020	680.026	717.556	669.116	516.79	488.937	520.358	636.823	605.107	672.842	459.887	500.679	537.805	787.585	718.031	595.394	526.74	524.468	583.922	ATP5ME	ATP synthase membrane subunit e
ENSG00000241468	661.958	749.184	644.16	591.967	572.165	592.144	654.005	635.262	637.629	518.327	532.464	515.437	618.847	593.334	561.331	604.019	511.404	512.413	ATP5MF	ATP synthase membrane subunit f
ENSG00000248919	7.49387	7.44842	7.86561	6.99079	7.58255	6.99547	7.90345	7.84467	8.73117	8.9004	7.37645	7.07541	5.81126	7.05536	6.65226	7.52787	6.90244	7.08703	ATP5MF-PTCD1	ATP5MF-PTCD1 readthrough
ENSG00000167283	775.464	886.106	795.169	733.357	747.75	735.411	836.086	817.015	921.767	707.317	691.854	767.363	873.403	794.13	754.869	765.558	761.919	761.218	ATP5MG	ATP synthase membrane subunit g
ENSG00000156411	499.109	542.779	513.72	416.234	426.618	404.751	508.021	511.852	399.776	395.021	398.173	426.304	573.296	517.991	466.289	442.246	404.946	418.466	ATP5MPL	ATP synthase membrane subunit 6.8PL
ENSG00000116459	427.332	502.101	483.541	417.99	390.451	393.592	475.602	477.756	290.992	374.782	396.803	397.145	481.303	461.078	415.367	393.56	393.166	390.243	ATP5PB	ATP synthase peripheral stalk-membrane subunit b
ENSG00000167863	634.688	739.447	691.398	581.032	555.824	558.129	671.33	685.141	666.248	545.416	524.1	597.85	736.767	709.522	659.816	536.158	532.998	530.81	ATP5PD	ATP synthase peripheral stalk subunit d
ENSG00000154723	362.073	392.707	367.421	343.012	362.617	344.493	378.306	382.568	401.363	354.245	330.977	381.445	382.725	385.445	342.908	336.824	333.123	336.856	ATP5PF	ATP synthase peripheral stalk subunit F6
ENSG00000241837	503.919	545.187	494.844	398.692	403.656	409.549	499.699	505.389	508.332	377.101	377.045	410.849	545.149	538.964	493.822	404.054	400.275	388.136	ATP5PO	ATP synthase peripheral stalk subunit OSCP
ENSG00000198899	4170.52	4031.82	3362.86	6427.43	5161.47	5236.56	5756.56	5194.79	2669.71	7204.55	7518.49	6348.87	5606.22	5840.64	7887.48	8375.39	7351.04	7481.52	ATP6	ATP synthase F0 subunit 6
ENSG00000071553	223.43	219.879	238.346	298.402	307.378	316.884	232.393	245.242	249.936	302.396	308.563	303.733	273.745	282.088	287.073	349.348	382.658	367.828	ATP6AP1	ATPase H+ transporting accessory protein 1
ENSG00000205464	1.94921	1.59564	2.39075	3.20633	2.58203	2.86227	1.23058	1.43885	1.64617	2.94443	2.62582	2.25102	1.94396	2.05157	2.26888	2.77912	2.81128	3.82964	ATP6AP1L	ATPase H+ transporting accessory protein 1 like
ENSG00000182220	198.661	257.877	256.362	332.02	302.507	305.334	258.134	258.292	195.674	328.145	311.745	281.831	260.768	259.407	238.93	296.015	302.734	280.486	ATP6AP2	ATPase H+ transporting accessory protein 2
ENSG00000033627	46.4694	42.5464	45.5791	52.2998	57.9243	59.3078	45.5572	45.2763	53.4708	57.4691	55.1219	50.5449	40.3979	44.5872	52.6036	59.8725	65.4787	60.0255	ATP6V0A1	ATPase H+ transporting V0 subunit a1
ENSG00000185344	16.9335	20.9958	18.3624	13.126	15.3855	17.4231	21.1471	21.1606	18.1908	16.9267	18.0892	12.5035	10.881	14.2864	17.8376	15.5588	17.2531	13.0698	ATP6V0A2	ATPase H+ transporting V0 subunit a2
ENSG00000105929	0.351517	0.509353	0.400786	0.646242	0.64009	0.651407	0.615052	0.21787	0.319944	0.737828	0.811036	0.645045	0.584143	0.699079	0.616845	0.752374	1.44539	0.663544	ATP6V0A4	ATPase H+ transporting V0 subunit a4
ENSG00000117410	205.72	212.301	199.275	200.522	215.999	211.235	188.017	207.506	241.734	187.155	180.298	196.194	178.259	157.198	160.829	197.722	193.299	202.284	ATP6V0B	ATPase H+ transporting V0 subunit b
ENSG00000185883	292.152	257.763	297.572	308.565	346.882	332.167	237.232	257.707	324.158	279.743	276.605	307.174	270.215	268.908	254.075	267.933	273.156	292.096	ATP6V0C	ATPase H+ transporting V0 subunit c
ENSG00000159720	117.771	111.338	117.702	175.421	183.95	174.531	108.716	110.788	130.169	164.192	152.367	168.505	118.229	119.375	117.768	162.512	174.242	179.293	ATP6V0D1	ATPase H+ transporting V0 subunit d1
ENSG00000113732	281.949	320.704	298.322	532.924	515.449	525.704	267.5	274.965	236.635	498.963	491.549	510.406	327.327	325.773	316.547	524.31	559.61	566.644	ATP6V0E1	ATPase H+ transporting V0 subunit e1
ENSG00000171130	41.2246	37.8427	42.2789	42.5375	46.53	48.1955	36.3211	35.3809	44.5532	38.1951	39.078	40.9251	44.136	40.9234	39.7918	39.064	45.2656	42.7254	ATP6V0E2	ATPase H+ transporting V0 subunit e2
ENSG00000204934	0.746188	0.733885	1.26808	1.32989	1.0704	1.30465	0.857152	0.850889	0.892956	1.41374	1.3231	1.28579	1.19245	1.30064	1.28544	1.30404	1.72821	1.59742	ATP6V0E2-AS1	ATP6V0E2 antisense RNA 1
ENSG00000114573	45.6679	50.2227	54.9247	70.0972	65.7989	67.6152	52.796	51.8429	40.9467	72.7266	71.2411	64.0079	44.3561	46.8345	50.5148	71.3283	76.1798	74.0997	ATP6V1A	ATPase H+ transporting V1 subunit A
ENSG00000116039	1.31159	0.701706	0.491159	1.87189	1.42164	0.956054	0.53631	0.523193	0.266081	0.681678	0.779061	1.32607	0.332769	0.122705	0.41987	0.879031	0.88641	1.08565	ATP6V1B1	ATPase H+ transporting V1 subunit B1
ENSG00000147416	66.7992	72.6852	76.8385	126.005	121.793	124.44	71.5187	71.393	70.6267	126.314	123.215	114.899	78.4412	82.3904	84.3335	131.93	135.274	129.875	ATP6V1B2	ATPase H+ transporting V1 subunit B2
ENSG00000155097	62.3935	81.1578	77.0759	109.547	107.186	105.331	76.2491	74.3859	39.5047	112.829	101.569	102.976	60.4322	73.8905	78.0204	132.922	134.866	124.741	ATP6V1C1	ATPase H+ transporting V1 subunit C1
ENSG00000143882	1.37414	0.997148	1.03477	2.94243	3.07905	4.24777	2.45613	1.61772	1.43064	4.04399	4.09466	5.03188	0.991576	1.15379	1.19229	2.28655	2.5046	3.59979	ATP6V1C2	ATPase H+ transporting V1 subunit C2
ENSG00000100554	98.9182	118.273	122.046	289.54	234.574	248.104	115.742	113.507	124.789	274.094	257.983	261.415	144.006	156.299	133.756	283.883	272.701	277.008	ATP6V1D	ATPase H+ transporting V1 subunit D
ENSG00000131100	100.798	106.139	110.889	181.923	182.875	176.33	113.362	111.514	130.904	185.855	177.681	188.376	119.098	117.033	108.373	191.991	182.73	196.549	ATP6V1E1	ATPase H+ transporting V1 subunit E1
ENSG00000250565	5.16924	6.13747	6.41465	8.25723	7.59772	6.83809	5.36136	6.54276	6.07682	8.45055	6.92089	6.54415	4.27331	5.7403	6.10694	7.63097	7.28313	8.34359	ATP6V1E2	ATPase H+ transporting V1 subunit E2
ENSG00000128524	169.392	164.989	158.635	203.048	218.7	218.306	154.801	157.138	177.871	183.677	183.744	197.003	168.008	166.11	165.36	191.487	208.197	200.409	ATP6V1F	ATPase H+ transporting V1 subunit F
ENSG00000272899	0.177457	0.232154	0.171227	0.239002	0.239873	0.368405	0.211294	0.175858	0.225826	0.300216	0.431612	0.424689	0.163194	0.173218	0.292537	0.237048	0.414425	0.362841	ATP6V1FNB	ATP6V1F neighbor
ENSG00000136888	171.831	183.629	174.817	309.247	299.671	280.091	167.978	155.178	201.45	262.335	250.421	248.041	184.676	183.877	168.955	327.405	296.086	307.588	ATP6V1G1	ATPase H+ transporting V1 subunit G1
ENSG00000213760	1.77365	0.969767	1.28752	1.21909	0.951289	1.19061	1.89842	1.84203	0.988789	0.68124	1.00775	1.21371	0.871401	0.989794	1.41876	0.802484	1.531	1.03155	ATP6V1G2	ATPase H+ transporting V1 subunit G2
ENSG00000254870	0.166349	0.564866	0	0	0	0.063585	0.175683	0.139064	0.072893	0	0.071896	0.092183	0.238309	0	0.098836	0.077206	0	0.613388	ATP6V1G2-DDX39B	ATP6V1G2-DDX39B readthrough (NMD candidate)
ENSG00000047249	74.8886	78.8213	79.4968	151.024	151.656	149.083	73.8143	73.2246	74.0177	149.169	142.261	143.808	91.9775	77.2968	72.5381	157.883	150.859	146.874	ATP6V1H	ATPase H+ transporting V1 subunit H
ENSG00000165240	2.75857	3.19472	2.90512	3.67529	3.58417	3.79767	3.26742	3.19522	2.39632	3.90847	3.94121	3.18031	2.07533	2.50925	2.8123	4.40565	4.62809	4.09087	ATP7A	ATPase copper transporting alpha
ENSG00000123191	8.73062	7.99856	8.9666	5.11423	5.67717	5.9544	5.87387	6.45975	6.2857	5.76365	4.28138	4.18222	4.31302	6.25768	6.84707	5.30478	6.11458	4.85286	ATP7B	ATPase copper transporting beta
ENSG00000228253	3033.6	5312.88	4479.69	7516.66	5238.71	6721.45	7715.97	6444.65	202.914	9216.9	8805.15	7220.53	5733.61	6731.74	9934.45	10568.7	9163.75	9294.87	ATP8	ATP synthase F0 subunit 8
ENSG00000124406	2.54093	4.20853	2.97717	11.9814	11.0204	11.8773	4.143	3.22284	2.22204	11.5194	9.94643	8.90383	2.94352	3.60618	3.93811	13.827	14.616	12.8064	ATP8A1	ATPase phospholipid transporting 8A1
ENSG00000132932	0.418033	0.576612	0.557658	0.453715	0.624779	0.640084	0.474272	0.550246	0.632451	0.68209	0.720708	0.66387	0.492356	0.497237	0.565336	0.521	0.827788	0.580454	ATP8A2	ATPase phospholipid transporting 8A2
ENSG00000081923	13.3113	14.3725	16.391	24.2452	24.4147	25.1917	14.0748	12.6485	12.4856	25.7378	23.86	20.4253	11.5341	14.2643	15.2995	26.2911	27.6284	26.2698	ATP8B1	ATPase phospholipid transporting 8B1
ENSG00000143515	14.2033	10.8183	14.6807	14.7168	16.4866	15.3533	14.6384	12.6398	14.5592	16.2744	17.5898	14.7499	10.5496	11.3921	13.3843	16.78	20.8411	19.6615	ATP8B2	ATPase phospholipid transporting 8B2
ENSG00000130270	1.48296	1.64928	2.12329	4.06086	5.57368	5.89806	1.73352	1.7504	2.54021	5.69515	6.97641	4.2729	1.33203	0.797618	2.34212	5.45328	6.07691	6.94686	ATP8B3	ATPase phospholipid transporting 8B3
ENSG00000054793	10.9805	10.9867	12.3443	18.4352	18.8962	19.138	10.8314	11.3178	11.0926	20.4591	18.5036	15.4667	7.94486	9.73188	11.0317	17.0103	18.3998	16.9827	ATP9A	ATPase phospholipid transporting 9A (putative)
ENSG00000166377	9.6494	9.2037	10.4472	12.9236	14.8822	15.1748	8.22122	10.2398	6.84016	13.5552	12.4688	11.1456	8.17961	8.80463	10.0294	12.4801	13.6726	12.098	ATP9B	ATPase phospholipid transporting 9B (putative)
ENSG00000123472	64.2607	70.4327	71.2338	55.3161	55.2352	54.6305	74.2442	72.1637	63.8233	56.2179	58.6734	63.9669	72.6209	72.7594	69.6403	56.9058	57.8501	60.0819	ATPAF1	ATP synthase mitochondrial F1 complex assembly factor 1
ENSG00000171953	25.3413	22.1998	20.637	23.359	22.1581	22.363	24.0048	19.2513	23.8144	19.1849	25.3563	24.7649	24.207	22.2591	20.6564	23.8585	28.8755	22.9544	ATPAF2	ATP synthase mitochondrial F1 complex assembly factor 2
ENSG00000150756	26.2955	29.4932	30.5069	33.2424	34.4251	29.0414	25.5684	25.913	24.4067	27.399	25.0773	28.7988	27.8588	25.3523	30.9419	31.5467	30.0419	27.8501	ATPSCKMT	ATP synthase c subunit lysine N-methyltransferase
ENSG00000175054	14.7735	16.2071	17.1697	16.4981	15.0749	16.3194	17.5512	16.7792	11.0362	17.5155	17.2741	15.047	11.0733	10.9492	13.6086	17.1806	17.3716	16.4616	ATR	ATR serine/threonine kinase
ENSG00000138085	138.975	145.187	133.749	147.792	152.077	148.568	140.229	141.339	136.017	148.809	142.894	149.745	142.929	145.915	136.183	153.328	151.354	155.506	ATRAID	all-trans retinoic acid induced differentiation factor
ENSG00000164053	11.0882	10.7593	10.6508	9.00018	9.23798	8.78648	11.7766	10.8662	10.6414	8.40563	7.65904	6.25272	8.83288	9.45946	11.324	6.75783	8.22468	6.94164	ATRIP	ATR interacting protein
ENSG00000088812	33.2151	35.884	38.6042	60.8892	61.1701	67.8249	36.8069	35.6484	30.3337	65.6003	67.2536	50.4339	37.6516	46.3185	49.8569	69.5266	80.1861	67.8985	ATRN	attractin
ENSG00000107518	1.25583	1.59245	2.00128	0.981657	0.895392	0.835684	1.13317	1.02621	0.975708	0.888043	0.925382	0.88867	1.53958	1.91586	1.32228	1.05889	0.857506	1.52228	ATRNL1	attractin like 1
ENSG00000085224	14.4321	16.4278	15.8575	14.4202	15.394	16.9521	17.2692	14.2186	8.91895	17.7582	19.6041	12.1543	10.8075	14.016	16.9002	18.6111	17.8517	20.1902	ATRX	ATRX chromatin remodeler
ENSG00000124788	2.95528	3.53919	4.12022	10.2683	9.63121	9.77211	3.67119	4.02368	3.67265	10.3488	9.01889	8.54579	3.54259	4.19572	5.05881	13.2241	13.2206	12.1753	ATXN1	ataxin 1
ENSG00000130638	142.207	142.302	139.113	141.985	148.634	150.085	141.359	142.29	115.705	138.222	151.789	142.44	157.362	162.034	152.786	148.922	157.335	154.769	ATXN10	ataxin 10
ENSG00000224470	14.1605	13.745	16.7212	21.8511	22.5758	22.2481	15.0284	15.5295	13.5495	22.4886	22.0545	18.2268	12.2256	13.8754	16.2019	21.9457	23.3885	21.5064	ATXN1L	ataxin 1 like
ENSG00000204842	22.643	25.434	32.7746	37.004	31.2132	35.7494	31.6645	22.603	20.5706	39.5742	42.2156	30.3967	17.031	20.0642	26.5131	43.1798	36.6696	36.2646	ATXN2	ataxin 2
ENSG00000258099	2.73109	1.74157	1.90438	2.35327	3.35008	2.7737	2.78155	2.39746	2.24071	2.45362	2.00402	2.72786	2.5354	1.63015	2.5611	2.36678	2.69788	2.61931	ATXN2-AS	ATXN2 antisense RNA
ENSG00000168488	71.87	60.4739	63.863	61.4904	60.8088	66.0087	68.9345	65.4051	66.4826	60.8176	63.9715	59.4209	55.5408	47.908	58.273	60.8331	66.3535	63.2038	ATXN2L	ataxin 2 like
ENSG00000066427	19.9475	23.7221	24.5231	28.3127	22.0564	20.1544	28.2451	26.3033	16.0123	28.7316	28.8316	20.9405	23.7892	26.5872	23.9825	27.2788	30.5348	26.0329	ATXN3	ataxin 3
ENSG00000163635	3.81708	3.14925	4.28437	4.94224	5.04671	4.80108	4.15798	4.59031	3.89103	4.82518	5.26512	3.35627	2.11349	3.4594	4.33814	4.85558	5.52895	5.31644	ATXN7	ataxin 7
ENSG00000285258	0.729458	0.560548	0.378724	0.558566	0.073185	0.327145	0.582951	0.56114	0.35432	1.77276	1.11315	1.43503	0.848393	0.666253	0.617208	1.05061	1.16302	0.605004	ATXN7	ataxin 7
ENSG00000146776	3.88472	4.7397	4.65806	6.93912	7.47156	6.77294	5.45176	4.87439	6.27623	6.35024	7.2225	5.91739	4.23278	4.64878	5.72035	6.29932	9.11238	7.28323	ATXN7L1	ataxin 7 like 1
ENSG00000162650	1.82733	1.31655	1.44625	1.85131	1.77702	1.64791	1.6274	1.79948	1.92272	1.66392	1.92301	1.54313	0.875795	1.49703	1.16302	1.49528	2.20573	1.47614	ATXN7L2	ataxin 7 like 2
ENSG00000087152	53.214	53.7374	54.935	60.5921	64.2347	61.4731	56.8626	59.4376	65.981	64.7842	64.5472	66.3214	49.2241	54.1375	57.4156	59.7879	65.9302	66.0268	ATXN7L3	ataxin 7 like 3
ENSG00000253719	74.4669	58.6217	59.9791	70.1552	89.6761	81.7763	60.4216	61.6359	89.8799	72.9506	72.382	77.5224	52.4004	62.9781	73.0518	68.1424	75.4024	77.4439	ATXN7L3B	ataxin 7 like 3B
ENSG00000148090	8.09392	9.20234	9.36505	9.94015	11.2652	10.1191	8.65744	8.57234	7.19298	10.0512	9.94798	10.411	8.27661	8.02016	8.27026	10.0905	11.6706	11.027	AUH	AU RNA binding methylglutaconyl-CoA hydratase
ENSG00000127423	6.35206	6.8071	6.86212	2.56167	3.12715	3.00905	6.30762	6.87776	6.37689	3.24559	3.38517	3.02205	4.57646	5.58714	5.00876	2.64968	2.85193	2.74276	AUNIP	aurora kinase A and ninein interacting protein
ENSG00000115307	103.894	104.323	102.267	91.2802	96.6978	98.0105	103.507	105.12	114.295	83.1426	86.0427	86.5399	80.2904	75.7651	77.5235	82.9595	84.3806	84.8412	AUP1	AUP1 lipid droplet regulating VLDL assembly factor
ENSG00000087586	95.4212	101.905	105.882	58.5071	58.189	59.2035	99.171	103.214	100.528	61.6034	58.1303	59.8841	78.5996	80.5569	83.5045	64.1773	65.0199	61.2858	AURKA	aurora kinase A
ENSG00000175756	187.846	174.6	185.682	142.148	156.199	150.18	182.604	183.647	232.984	138.796	146.12	164.35	188.965	173.878	157.83	129.824	128.538	135.947	AURKAIP1	aurora kinase A interacting protein 1
ENSG00000178999	55.0922	51.2367	54.6709	16.0408	16.5358	19.0875	51.0341	52.7089	51.697	14.9153	16.2609	17.5162	37.3333	34.1105	33.7225	15.6492	16.777	19.0656	AURKB	aurora kinase B
ENSG00000105146	0.420839	0.366319	0.225053	0.165407	0.093822	0.124039	0.224087	0.3571	0.416773	0.057518	0.047028	0.080658	0.380275	0.230832	0.295239	0.110781	0.38037	0.11883	AURKC	aurora kinase C
ENSG00000158321	32.4063	26.838	31.5737	31.5579	32.6851	34.0609	30.5187	28.8505	28.6114	32.1748	34.4373	26.6467	27.608	34.7519	37.8209	33.1083	37.5494	29.7761	AUTS2	activator of transcription and developmental regulator AUTS2
ENSG00000169857	13.1757	14.5982	13.7798	11.0616	10.0986	10.0294	12.901	13.1331	10.6967	10.1617	8.13291	9.54979	13.5408	13.9601	13.755	10.6817	10.6604	10.857	AVEN	apoptosis and caspase activation inhibitor
ENSG00000135407	0.484785	0.636985	0.665401	2.97837	3.08719	3.65011	1.15401	1.39989	0.334534	2.60104	2.57864	2.52001	0.807697	0.563004	1.4066	5.05178	4.23179	3.64264	AVIL	advillin
ENSG00000105778	37.004	37.2231	43.7315	33.2726	34.406	35.4811	42.035	40.4706	40.1522	41.0966	37.2827	29.5168	27.4452	37.156	37.1027	44.903	40.406	39.7299	AVL9	AVL9 cell migration associated
ENSG00000119986	16.0868	15.5969	16.9756	18.8349	18.3982	18.9652	17.103	15.5621	17.2127	19.7876	20.4046	19.7535	18.8455	19.3286	15.7798	18.5683	18.3012	18.449	AVPI1	arginine vasopressin induced 1
ENSG00000162779	0.75541	0.836988	0.568443	0.398128	0.750746	0.725032	1.28467	1.17671	0.939595	0.5541	0.75482	0.770377	0.400622	0.164485	0.251638	1.06197	0.474834	0.563113	AXDND1	axonemal dynein light chain domain containing 1
ENSG00000103126	21.3383	18.8644	20.3567	17.3741	19.3605	19.6437	18.9306	17.7332	20.0947	16.8099	16.9234	18.0081	15.0565	15.0079	15.8644	18.5155	19.787	18.4151	AXIN1	axin 1
ENSG00000167601	0.193981	0.214186	0.402286	0.047969	0.015912	0.081836	0.152083	0.132282	0.196342	0.023052	0.017546	0.114329	0.188593	0.326945	0.259842	0.011885	0.027041	0.862417	AXL	AXL receptor tyrosine kinase
ENSG00000160862	217.709	229.126	220.361	132.673	131.222	137.859	289.309	300.041	301.502	116.486	128.485	119.898	134.424	116.518	131.3	75.3213	66.6624	72.6984	AZGP1	alpha-2-glycoprotein 1, zinc-binding
ENSG00000214313	5.85025	5.95737	6.04054	3.19338	2.42222	2.45484	7.66562	6.67632	8.58574	2.32397	1.89395	2.28826	2.83035	1.61923	2.14767	1.14153	1.43512	0.86972	AZGP1P1	AZGP1 pseudogene 1
ENSG00000163512	36.8372	41.6047	42.2312	43.1917	47.4865	43.7764	42.5389	47.6533	36.711	46.7054	49.2599	40.9359	41.7086	43.2982	43.5113	49.3207	45.87	45.373	AZI2	5-azacytidine induced 2
ENSG00000155096	112.339	134.846	142.418	109.033	103.363	109.015	119.161	120.324	97.1201	109.017	103.592	99.8637	100.099	108.207	121.711	107.876	113.827	104.304	AZIN1	antizyme inhibitor 1
ENSG00000142920	1.11164	0.510089	0.738359	0.266124	1.56552	0.939432	0.465027	0.469638	0.545443	2.06737	0.973612	0.277493	0.418425	0.3561	0.51294	0.354364	1.32288	1.7555	AZIN2	antizyme inhibitor 2
ENSG00000172232	1.30071	0.798676	0.921404	0.83922	0.984823	1.38929	0.822476	0.663195	0.802635	0.845963	1.30395	1.01811	0.47548	0.231827	0.240393	0.203865	0.095217	0.109708	AZU1	azurocidin 1
ENSG00000166710	844.442	1033.68	955.104	1288.39	1091.01	1117.88	1106.28	1156.7	982.659	1396.79	1331.02	1416.63	1035.26	1010.32	915.519	1374.15	1282.01	1258.03	B2M	beta-2-microglobulin
ENSG00000169255	31.922	40.4082	40.0359	33.0846	32.2897	31.7395	35.0835	35.9162	32.8939	30.9836	29.1467	26.3455	32.8143	35.1398	35.3405	38.0315	34.8374	29.2544	B3GALNT1	beta-1,3-N-acetylgalactosaminyltransferase 1 (globoside blood group)
ENSG00000162885	21.6468	26.2173	26.3081	26.5631	27.0922	25.8831	23.8747	23.8124	22.6843	25.7784	26.0707	24.6278	16.4507	18.0565	20.5498	28.145	27.8943	25.8266	B3GALNT2	beta-1,3-N-acetylgalactosaminyltransferase 2
ENSG00000235863	8.29142	7.53596	8.71163	15.8193	15.8985	16.8884	8.36837	8.088	10.0724	18.5739	16.6118	19.468	11.8017	12.0831	11.2739	18.5488	17.8513	18.8918	B3GALT4	beta-1,3-galactosyltransferase 4
ENSG00000176022	14.4769	13.149	14.4482	15.5782	16.4514	15.5454	12.2362	12.356	14.7086	14.084	13.826	15.6058	13.8193	13.8501	13.9434	14.1647	15.4431	16.3309	B3GALT6	beta-1,3-galactosyltransferase 6
ENSG00000149541	73.0494	63.5383	63.8816	56.3698	57.3598	60.9013	65.7018	66.1616	73.2432	50.928	54.0097	59.7408	50.8085	47.3229	43.7097	39.2009	42.0005	46.9399	B3GAT3	beta-1,3-glucuronyltransferase 3
ENSG00000187676	2.6374	2.59726	3.0968	2.33536	2.39503	2.72223	2.69696	2.45453	2.48159	2.40021	2.54321	2.41025	1.84887	1.79755	1.93331	2.14564	2.54712	2.5133	B3GLCT	beta 3-glucosyltransferase
ENSG00000170340	8.89115	10.5697	10.3893	17.884	16.3253	18.0501	10.111	10.3166	9.03115	17.5512	16.8815	16.9889	9.96301	9.5953	10.124	18.7246	19.3844	18.1959	B3GNT2	UDP-GlcNAc:betaGal beta-1,3-N-acetylglucosaminyltransferase 2
ENSG00000179913	4.01498	3.38057	3.88178	4.01542	3.79012	4.48409	2.55604	2.45877	2.69539	2.75772	2.81456	2.72851	2.60624	3.10858	2.82206	2.8308	2.8516	3.09766	B3GNT3	UDP-GlcNAc:betaGal beta-1,3-N-acetylglucosaminyltransferase 3
ENSG00000176383	7.27956	6.32698	6.18383	2.71875	3.29895	2.14646	7.3821	7.22275	8.53325	4.13229	6.09296	4.80591	5.96536	7.20503	6.76092	3.82617	2.58419	3.26425	B3GNT4	UDP-GlcNAc:betaGal beta-1,3-N-acetylglucosaminyltransferase 4
ENSG00000156966	0.053396	0.132266	0.042785	0.266961	0.30054	0.295283	0.06383	0.061476	0.065541	0.213836	0.220694	0.214578	0.103647	0.070226	0.108457	0.293388	0.180737	0.289692	B3GNT7	UDP-GlcNAc:betaGal beta-1,3-N-acetylglucosaminyltransferase 7
ENSG00000177191	1.90722	0.115929	0.239486	0.439122	0.116878	0.096417	0.377446	0.183384	0.221654	0.360955	0.283504	0.396282	0.019348	0	0.038117	0.026847	0	0	B3GNT8	UDP-GlcNAc:betaGal beta-1,3-N-acetylglucosaminyltransferase 8
ENSG00000237172	1.10486	1.18917	1.4905	1.87884	1.99426	1.49718	1.05316	1.31382	0.914494	1.57307	1.49422	1.63447	0.736264	0.806876	0.916428	1.57591	1.49659	2.0307	B3GNT9	UDP-GlcNAc:betaGal beta-1,3-N-acetylglucosaminyltransferase 9
ENSG00000175711	5.54003	6.25353	4.15216	4.7933	3.12215	4.03043	4.10582	4.23262	4.61977	3.40072	2.86696	3.00824	3.67203	4.1166	3.73176	3.20911	3.63782	2.85219	B3GNTL1	UDP-GlcNAc:betaGal beta-1,3-N-acetylglucosaminyltransferase like 1
ENSG00000135454	5.21314	5.17957	5.07497	0.556584	0.783624	0.776025	3.44982	3.88779	4.19272	1.08607	0.700381	0.628308	0.900461	1.36465	1.36811	0.476592	0.469816	0.474449	B4GALNT1	beta-1,4-N-acetyl-galactosaminyltransferase 1
ENSG00000167080	0.27129	0.242742	0.283194	0.495652	0.57363	0.52172	0.419514	0.42128	0.491222	0.52849	0.572514	0.407556	0.103314	0.103097	0.26762	0.39846	0.539779	0.37101	B4GALNT2	beta-1,4-N-acetyl-galactosaminyltransferase 2
ENSG00000139044	6.34168	7.43861	6.14109	5.94714	5.8592	6.21331	4.36066	4.60647	4.33218	4.45167	4.55439	4.38235	2.52055	2.60395	3.00652	5.61674	5.52707	4.82489	B4GALNT3	beta-1,4-N-acetyl-galactosaminyltransferase 3
ENSG00000182272	21.0119	15.0912	18.8883	12.3961	14.0061	15.5644	14.7865	14.2258	17.7809	8.38206	11.5429	13.1891	10.344	7.05699	8.81397	8.49951	9.75413	10.6093	B4GALNT4	beta-1,4-N-acetyl-galactosaminyltransferase 4
ENSG00000086062	150.215	161.524	181.517	70.6585	71.0506	72.9287	163.947	173.567	172.54	75.628	79.08	73.1119	124.396	135.983	155.206	65.7384	68.0328	64.2127	B4GALT1	beta-1,4-galactosyltransferase 1
ENSG00000117411	49.7143	49.7758	50.4484	26.962	29.1984	31.045	47.4415	47.3247	54.7821	28.6888	30.0004	31.8228	49.8889	51.6367	45.8779	27.2501	27.5534	27.766	B4GALT2	beta-1,4-galactosyltransferase 2
ENSG00000158850	66.6548	60.5796	67.4804	52.0492	56.8924	54.3949	65.3714	68.8651	74.8338	49.3971	51.0978	52.9108	60.6857	54.6735	56.9957	50.7896	53.8236	54.081	B4GALT3	beta-1,4-galactosyltransferase 3
ENSG00000121578	26.1086	30.3668	29.3135	32.1161	34.7491	31.7536	26.2811	27.6643	25.4418	32.7351	34.3044	32.9053	28.383	28.1072	25.8416	37.6554	36.6827	37.7944	B4GALT4	beta-1,4-galactosyltransferase 4
ENSG00000158470	19.4138	19.96	22.3168	19.0588	18.5731	19.5634	22.1185	21.4171	20.7339	20.6598	19.5727	17.6413	14.5479	16.8374	18.9825	19.3379	21.0894	19.8953	B4GALT5	beta-1,4-galactosyltransferase 5
ENSG00000118276	0.985424	1.12185	1.08607	1.00866	0.922231	0.927482	1.08305	1.15735	0.668118	0.664373	0.905467	0.724478	0.558754	0.551729	0.772798	1.11414	0.9479	0.943905	B4GALT6	beta-1,4-galactosyltransferase 6
ENSG00000027847	22.2955	20.6685	21.7206	20.2764	22.2304	23.3004	20.9352	23.3219	24.4307	21.349	21.3083	24.1456	21.6291	21.9237	19.4729	23.5334	23.8358	21.2402	B4GALT7	beta-1,4-galactosyltransferase 7
ENSG00000174684	65.8554	67.3941	67.1088	54.4919	57.7462	57.2457	64.5359	67.4827	68.7264	52.1582	52.9827	56.409	65.6311	67.2399	61.8962	55.9615	54.4817	55.1938	B4GAT1	beta-1,4-glucuronyltransferase 1
ENSG00000108641	77.8743	76.0904	68.2365	62.1677	60.2507	66.6383	72.3205	66.0417	68.9882	52.5969	57.0751	59.3096	68.9593	66.6189	58.6881	52.4376	54.296	49.4476	B9D1	B9 domain containing 1
ENSG00000123810	5.22419	4.47954	4.30703	6.68698	8.23017	7.82994	4.62542	5.32145	6.1328	7.19492	7.90792	8.6096	5.00545	5.64886	4.1654	6.46744	4.91362	5.52153	B9D2	B9 domain containing 2
ENSG00000105393	78.5056	74.2162	70.4691	91.5393	100.813	97.8018	78.8855	75.4135	86.7621	91.0066	94.9899	101.507	74.5853	71.4443	68.4424	88.5445	90.8077	94.806	BABAM1	BRISC and BRCA1 A complex member 1
ENSG00000158019	26.3201	27.2671	26.5012	34.6346	32.5344	33.7249	29.0503	27.6903	28.6999	31.9029	32.9521	31.0771	27.3443	29.7223	27.8068	30.7121	30.0515	30.5004	BABAM2	BRISC and BRCA1 A complex member 2
ENSG00000186318	32.5686	34.9129	35.9826	36.2355	36.5982	38.3894	38.3156	38.6763	34.9512	40.7455	41.1714	33.3228	31.5795	38.6149	41.1584	39.3445	45.6312	40.666	BACE1	beta-secretase 1
ENSG00000182240	63.762	67.4232	64.598	109.421	115.268	116.342	64.2643	66.2459	68.9079	122.996	114.773	110.975	90.232	101.212	101.241	123.108	123.878	118.669	BACE2	beta-secretase 2
ENSG00000156273	73.216	80.6483	79.6423	63.624	55.1256	55.3414	87.0721	79.2253	84.0263	76.188	76.741	73.4544	136.982	137.98	127.652	87.1059	80.3107	79.5426	BACH1	BTB domain and CNC homolog 1
ENSG00000112182	0.778086	0.693679	1.25203	0.750883	0.364201	0.340441	0.788987	0.766249	0.737636	0.419915	0.685508	0.142023	0.37672	0.267715	0.408686	0.721078	0.205459	0.565187	BACH2	BTB domain and CNC homolog 2
ENSG00000002330	142.697	133.979	138.909	145.276	154.211	155.17	127.848	130.633	155.456	137.828	141.382	165.97	162.617	152.438	134.164	145.065	142.667	137.711	BAD	BCL2 associated agonist of cell death
ENSG00000107262	88.3428	98.0507	96.8564	95.0956	93.0481	90.3125	87.0031	88.5143	93.9926	90.5593	95.1226	99.5965	92.2239	93.4269	94.9247	99.9861	93.3185	93.7414	BAG1	BCL2 associated athanogene 1
ENSG00000112208	1.84231	1.87752	1.8171	2.44272	2.81353	2.56319	2.19644	2.22527	2.84885	2.72445	2.55805	2.63482	1.06938	1.20332	1.20223	2.20351	2.14316	2.23804	BAG2	BCL2 associated athanogene 2
ENSG00000151929	39.3063	38.5947	41.8083	46.3657	44.3914	47.7087	32.716	33.0988	36.2359	36.1921	40.3298	36.5072	24.3018	25.1088	25.3431	31.6333	36.5859	33.6743	BAG3	BCL2 associated athanogene 3
ENSG00000156735	7.12597	8.83917	9.68157	9.06384	8.28574	8.25164	8.38374	9.135	7.86009	10.4239	9.27354	7.99176	7.23832	7.60322	9.59562	9.56555	9.27935	8.82412	BAG4	BCL2 associated athanogene 4
ENSG00000166170	29.4282	33.8484	35.7116	36.8786	33.7112	35.2963	33.3276	34.2467	29.8733	38.4231	37.5631	32.1765	29.3343	33.3983	36.3723	37.6915	36.0045	34.8737	BAG5	BCL2 associated athanogene 5
ENSG00000204463	179.028	169.979	175.669	177.434	197.974	196.861	182.044	192.017	217.205	192.463	198.643	195.826	159.393	164.257	180.69	170.184	202.351	184.232	BAG6	BCL2 associated athanogene 6
ENSG00000187172	3.20327	1.5194	1.53581	2.38343	3.34821	2.53212	2.38406	2.65947	5.95014	2.77632	3.03066	4.11336	0	0.057068	0.036598	0.025455	0.029746	0.041076	BAGE2	BAGE family member 2
ENSG00000266074	0.943164	0.944955	0.798825	0.654034	1.30267	0.802754	1.23332	1.38369	1.86745	1.09313	1.53362	1.47764	0.362601	0.598067	0.792913	0.497508	0.527982	0.682918	BAHCC1	BAH domain and coiled-coil containing 1
ENSG00000140320	36.2191	34.8899	38.4262	30.313	31.2558	31.3041	34.9178	35.4588	36.5698	31.0117	30.5146	28.6531	33.4837	33.7847	34.0107	30.0413	31.9189	32.462	BAHD1	bromo adjacent homology domain containing 1
ENSG00000175866	73.9078	68.9785	72.1911	84.7806	90.5793	89.9211	81.0604	79.3642	84.7831	89.714	97.5695	87.1944	72.6728	75.1143	70.993	86.4236	89.9634	83.2464	BAIAP2	BAR/IMD domain containing adaptor protein 2
ENSG00000226137	10.6028	9.28206	10.5653	12.7296	12.6619	13.2297	9.12372	8.86888	9.6606	13.2199	12.451	12.4402	9.08148	10.426	11.0067	12.9791	13.8728	13.5915	BAIAP2-DT	BAIAP2 divergent transcript
ENSG00000006453	29.6286	28.9192	29.1347	18.8349	19.4993	19.0211	28.7004	30.1464	24.1442	19.3903	19.3326	18.178	21.6846	22.567	23.4566	21.115	21.4697	19.4785	BAIAP2L1	BAR/IMD domain containing adaptor protein 2 like 1
ENSG00000007516	8.23255	6.15655	6.95227	10.01	10.5832	10.2252	6.49685	5.74333	7.35448	8.88462	10.369	11.1607	7.29845	5.83121	6.72298	9.18437	9.16989	9.37354	BAIAP3	BAI1 associated protein 3
ENSG00000030110	31.0062	31.2892	31.9694	21.5498	23.9505	23.4073	28.9676	29.9818	32.2594	19.2988	20.4967	21.9401	28.1533	29.357	28.0528	22.4085	24.0287	22.5426	BAK1	BCL2 antagonist/killer 1
ENSG00000095739	62.5184	61.2933	60.3103	493.316	507.726	468.785	59.5278	61.6843	64.3654	433.532	385.178	440.181	171.297	179.596	165.227	477.611	446.575	486.917	BAMBI	BMP and activin membrane bound inhibitor
ENSG00000175334	658.82	628.096	653.712	578.501	648.552	601.491	632.951	635.331	774.318	552.81	534.109	624.976	656.302	632.631	617.128	510.424	532.294	546.643	BANF1	barrier to autointegration factor 1
ENSG00000153064	1.63368	1.51964	1.48833	3.00146	2.46357	3.20669	0.873042	1.11194	0.881378	2.22554	2.46658	3.14389	0.725318	0.999395	1.10364	4.2598	2.98538	2.85792	BANK1	B cell scaffold protein with ankyrin repeats 1
ENSG00000172530	16.5565	15.1986	14.6598	20.4124	20.9482	20.5275	15.9056	12.7156	17.513	22.2642	20.7668	17.1719	13.827	14.0574	16.3126	19.8285	19.674	21.5792	BANP	BTG3 associated nuclear protein
ENSG00000163930	30.5568	27.9228	32.1049	30.0716	31.6164	31.8713	29.7902	30.2351	32.9917	29.3447	30.5732	28.7437	28.1359	28.6783	28.9851	29.8496	31.3943	30.9159	BAP1	BRCA1 associated protein 1
ENSG00000138376	11.7372	14.3719	15.3694	5.43871	6.53344	6.12888	15.9931	12.5422	10.4536	6.65027	9.85717	4.98494	7.34498	8.39831	10.7625	6.23062	6.70208	5.35851	BARD1	BRCA1 associated RING domain 1
ENSG00000043039	5.16311	5.40775	5.43804	6.19019	6.95077	7.09232	3.2531	2.9088	3.45383	4.0179	4.34946	4.26093	3.59228	3.2957	3.20233	4.44487	4.55578	4.88816	BARX2	BARX homeobox 2
ENSG00000176788	0.163189	0.025003	0.432332	0.067287	0.02165	0	0.130236	0.03996	0	0	0	0.179209	0	0.017928	0.076671	0.029077	0	4.4713	BASP1	brain abundant membrane attached signal protein 1
ENSG00000156127	3.81038	3.12457	4.21693	9.59866	9.70978	9.1637	1.49759	1.94721	2.37782	4.33816	4.48161	4.74643	2.37426	2.32109	2.53367	4.99064	3.96886	5.61081	BATF	basic leucine zipper ATF-like transcription factor
ENSG00000168062	0.379371	0.317545	0.381486	0.766674	0.632849	1.10505	0.516976	0.536129	0.862098	1.46576	1.43177	1.02296	0.20584	0.36918	0.216058	0.965251	0.550373	0.775085	BATF2	basic leucine zipper ATF-like transcription factor 2
ENSG00000123685	0.314901	0.826109	0.962525	0.206662	0.283688	0.0472	1.1879	0.660155	1.05619	0.192817	0.269877	0.558072	0.286375	0.391636	0.224913	0.017975	0.209818	0	BATF3	basic leucine zipper ATF-like transcription factor 3
ENSG00000087088	45.0477	42.6181	43.0368	39.7897	49.9531	42.8513	46.3919	45.7763	56.5945	41.8478	48.3682	49.1674	47.5896	46.5201	36.3185	38.3635	42.4173	47.4339	BAX	BCL2 associated X, apoptosis regulator
ENSG00000198604	20.2158	21.6229	23.8226	20.419	17.8612	19.0029	21.9936	20.7171	14.2959	20.8825	20.7106	17.5476	14.5978	16.2721	17.4063	22.5658	21.9257	20.7802	BAZ1A	bromodomain adjacent to zinc finger domain 1A
ENSG00000009954	47.6503	52.1293	58.0147	46.3583	43.2579	44.4644	51.2011	49.9683	42.9119	46.6509	45.0535	37.4166	41.2302	50.7036	53.5673	47.7902	47.9773	48.5634	BAZ1B	bromodomain adjacent to zinc finger domain 1B
ENSG00000076108	52.8114	47.3041	49.0257	50.4684	58.5612	55.0384	42.2664	41.739	40.4033	58.9398	56.5863	37.0951	29.6997	38.4376	45.597	62.9377	68.4491	65.7775	BAZ2A	bromodomain adjacent to zinc finger domain 2A
ENSG00000123636	4.53339	6.22466	5.89485	9.38285	8.68604	7.80015	5.16487	4.5694	4.3439	9.6718	10.2884	8.75561	4.04355	5.75046	6.55155	9.37704	10.0153	12.091	BAZ2B	bromodomain adjacent to zinc finger domain 2B
ENSG00000226266	1.89163	2.60447	2.18774	2.93124	3.70521	4.88	2.5325	2.77866	2.38979	2.04053	3.53548	2.62441	1.92304	3.01936	1.84927	2.55153	5.33358	4.56068	BAZ2B	bromodomain adjacent to zinc finger domain 2B
ENSG00000105327	5.30772	4.42446	5.11644	9.04296	9.48111	10.1775	4.49304	4.83455	5.18527	9.08628	11.9823	9.62627	4.71603	3.98907	3.25646	10.6155	10.1845	11.9739	BBC3	BCL2 binding component 3
ENSG00000214413	10.6452	12.8604	14.1682	12.8357	10.1073	10.1597	11.3963	11.3171	8.21151	14.6425	13.6203	13.5432	8.7739	8.64886	9.69873	11.5723	11.8804	12.4187	BBIP1	BBSome interacting protein 1
ENSG00000119636	11.3184	14.5821	13.9746	18.7893	18.9443	21.8518	12.0438	11.8341	8.41488	17.997	19.4542	16.1222	10.7815	9.93773	11.8729	15.771	14.8202	13.6377	BBOF1	basal body orientation factor 1
ENSG00000254560	0.273406	0.328579	0.075399	0.324719	0.325318	0.288095	0.266206	0	0.133586	0.295257	0	0.224348	0.403657	0.184654	0.148571	0.191298	0.099036	0.09941	BBOX1-AS1	BBOX1 antisense RNA 1
ENSG00000174483	23.0078	21.5042	19.4762	35.2341	36.704	37.6513	22.9632	20.0963	19.8406	34.3977	34.0865	29.7184	18.6886	17.3039	20.0524	28.5638	34.0162	30.9765	BBS1	Bardet-Biedl syndrome 1
ENSG00000179941	11.7037	15.9188	15.9501	19.6436	17.5698	19.3859	14.3702	13.6517	5.69645	17.4476	14.7657	14.1039	11.6148	12.7601	13.6235	19.8703	18.4625	18.3473	BBS10	Bardet-Biedl syndrome 10
ENSG00000181004	1.49135	1.96142	1.66697	2.33516	2.10886	2.38186	1.38726	1.43659	1.23892	2.27455	1.98962	1.78908	1.24051	1.88836	1.52502	1.99437	2.32897	2.10288	BBS12	Bardet-Biedl syndrome 12
ENSG00000125124	17.7105	20.4763	20.0187	28.1676	27.5843	27.0003	21.6928	18.8493	16.4283	28.0904	28.3421	27.005	15.6749	16.0474	15.5702	24.2765	23.2035	24.6939	BBS2	Bardet-Biedl syndrome 2
ENSG00000140463	24.9989	25.3628	26.6868	27.6316	29.156	29.3648	24.4125	24.74	20.5491	28.2272	29.043	25.4328	16.0242	16.6381	18.5808	31.1973	34.8508	26.7012	BBS4	Bardet-Biedl syndrome 4
ENSG00000163093	6.57368	5.53543	6.00643	8.2765	7.28063	6.638	7.49023	6.11804	6.56145	8.69629	7.78237	8.3836	5.90731	5.34671	5.59688	6.57266	6.28821	7.79321	BBS5	Bardet-Biedl syndrome 5
ENSG00000138686	14.9846	15.1285	19.158	12.2574	12.3612	11.6949	20.3544	17.896	15.6172	16.1324	11.469	12.3527	13.1778	14.4145	14.7397	15.2906	13.3786	15.4002	BBS7	Bardet-Biedl syndrome 7
ENSG00000122507	10.1986	13.0063	14.3572	17.7129	16.0964	17.4509	9.7939	12.1411	9.30701	16.9673	15.8208	16.0023	11.9624	13.2247	14.4568	17.4754	17.1308	16.4239	BBS9	Bardet-Biedl syndrome 9
ENSG00000114439	16.5479	20.0616	23.7211	20.6281	21.6604	20.4655	22.3851	20.7404	17.9573	23.8997	22.4746	17.1738	11.7638	16.6462	18.8419	22.0159	24.9427	21.7672	BBX	BBX high mobility group box domain containing
ENSG00000187244	160.447	142.894	159.059	339.598	362.479	376.074	150.894	151.177	178.657	324.845	351.322	338.277	196.314	196.067	188.512	309.315	315.632	316.388	BCAM	basal cell adhesion molecule (Lutheran blood group)
ENSG00000075790	38.9434	38.9212	40.2625	46.0127	59.9511	49.6875	37.7693	37.7411	23.8438	41.0824	39.524	49.058	35.3129	37.5285	42.0674	43.787	44.902	48.2851	BCAP29	B cell receptor associated protein 29
ENSG00000185825	288.878	294.05	292.806	275.006	282.13	278.842	333.945	338	349.639	289.781	303.068	308.851	316.219	314.68	317.586	282.633	290.698	277.926	BCAP31	B cell receptor associated protein 31
ENSG00000050820	36.8363	35.5591	39.9039	82.2124	80.143	79.9731	37.7438	38.2696	43.2566	72.6906	75.0149	70.6096	36.7469	36.0073	35.7914	68.8376	77.3509	81.0575	BCAR1	BCAR1 scaffold protein, Cas family member
ENSG00000137936	26.7648	26.3359	29.2059	51.1044	50.633	51.5413	24.703	23.534	24.1396	42.7228	41.3956	42.6219	40.2421	38.7751	35.6124	44.4865	46.3012	46.5784	BCAR3	BCAR3 adaptor protein, NSP family member
ENSG00000262117	2.79467	1.54633	2.81428	1.77255	1.86335	2.37861	2.61931	1.99358	2.12655	1.8757	2.67263	1.995	2.00057	1.77263	1.8263	3.56823	5.40952	2.93574	BCAR4	breast cancer anti-estrogen resistance 4
ENSG00000064787	5.93398	6.28647	6.64602	130.307	127.577	129.651	7.58684	6.42996	7.16679	121.579	121.708	111.703	9.33593	11.2841	10.7419	129.753	124.326	124.088	BCAS1	breast carcinoma amplified sequence 1
ENSG00000116752	52.0588	60.8178	60.4532	70.0356	68.2446	63.4648	58.4072	61.2606	55.3853	64.1523	64.668	65.6758	60.9644	59.3102	54.6301	64.7959	62.754	62.4388	BCAS2	BCAS2 pre-mRNA processing factor
ENSG00000141376	12.0855	14.9408	13.0779	19.0754	20.1808	20.2075	16.5916	11.9445	14.5521	25.4209	20.1398	17.8905	12.66	13.3288	13.3419	20.1082	22.8239	19.3581	BCAS3	BCAS3 microtubule associated cell migration factor
ENSG00000124243	96.0733	88.7278	86.2303	120.477	129.063	124.841	81.1148	76.948	91.9964	116.322	108.675	108.325	93.3908	98.4326	94.7083	122.444	129.667	129.27	BCAS4	breast carcinoma amplified sequence 4
ENSG00000105552	40.8224	36.4512	40.0198	33.5108	34.3406	36.1407	37.0446	36.2116	45.2316	30.9367	33.5102	35.3471	38.1245	36.8382	35.8101	31.8448	31.5155	30.9247	BCAT2	branched chain amino acid transaminase 2
ENSG00000107949	65.1406	75.1304	73.1296	70.3612	66.4001	65.7785	71.2239	70.0711	65.4844	62.7689	61.4643	68.4657	68.8435	71.1756	64.5507	63.5949	63.2747	64.5715	BCCIP	BRCA2 and CDKN1A interacting protein
ENSG00000186666	8.33748	8.04445	9.32538	10.3031	10.1365	10.0742	8.98963	8.99379	8.98264	10.167	10.2449	10.533	7.43976	7.13778	7.27775	9.62806	9.41461	9.35024	BCDIN3D	BCDIN3 domain containing RNA methyltransferase
ENSG00000258057	2.18125	2.73817	3.13858	1.61756	2.07142	1.6419	2.37983	2.42296	2.32695	2.74614	2.2973	2.74849	2.35409	2.00015	2.25759	1.62338	3.0514	1.62544	BCDIN3D-AS1	BCDIN3D antisense RNA 1
ENSG00000114200	24.0316	24.429	25.4388	2.8332	1.70839	2.39974	22.2442	23.5079	20.6288	5.03495	5.0818	4.73579	8.98925	8.86437	8.94008	0.901125	0.976809	0.823824	BCHE	butyrylcholinesterase
ENSG00000248098	44.9745	42.2089	46.3186	36.6838	40.2437	43.0545	42.874	43.7011	53.5264	34.5406	36.234	35.6109	44.0103	44.376	42.349	32.053	35.5259	35.651	BCKDHA	branched chain keto acid dehydrogenase E1 subunit alpha
ENSG00000083123	17.686	16.8779	16.7927	35.5118	35.4192	35.5589	14.4997	13.9415	13.4817	28.6417	28.9145	29.0697	14.8927	15.1064	15.9354	29.222	30.9194	29.3689	BCKDHB	branched chain keto acid dehydrogenase E1 subunit beta
ENSG00000103507	53.4174	51.0685	53.7346	41.4648	43.1575	44.6064	53.9813	52.6758	60.773	45.9408	44.0169	44.6665	49.6409	47.3114	46.5304	36.3277	43.1798	37.4377	BCKDK	branched chain keto acid dehydrogenase kinase
ENSG00000142867	8.16723	7.95345	7.7721	11.0621	12.0682	12.2315	8.28255	8.28733	6.34128	12.1019	10.4431	12.2464	6.8604	6.42964	8.7357	11.3926	9.78008	11.8795	BCL10	BCL10 immune signaling adaptor
ENSG00000171791	0.952769	0.971262	1.13612	1.32497	1.39753	1.37899	0.838152	0.778665	1.11662	1.58425	1.66932	1.6362	0.053089	0.079756	0.07496	0.166131	0.198172	0.197366	BCL2	BCL2 apoptosis regulator
ENSG00000171552	188.279	177.843	196.127	259.883	286.421	289.408	174.301	172.673	189.574	243.526	253.25	233.906	177.214	200.04	202.716	253.58	262.718	258.13	BCL2L1	BCL2 like 1
ENSG00000153094	4.9931	4.38737	4.74497	6.51901	4.55747	6.85907	5.13027	3.96961	3.79451	5.32275	4.60329	4.38096	2.292	2.55345	3.40579	4.64812	7.88333	4.89235	BCL2L11	BCL2 like 11
ENSG00000126453	44.032	39.553	42.3428	22.2366	20.959	23.3474	37.5338	36.9924	45.7499	17.8078	21.8019	20.4746	36.6172	32.0587	32.8061	17.5618	20.2764	18.9311	BCL2L12	BCL2 like 12
ENSG00000099968	34.7024	34.2569	37.3982	39.3612	43.965	40.7393	37.6925	35.891	37.6447	46.3342	41.035	38.5714	31.257	31.3922	35.0744	46.7105	43.561	41.8963	BCL2L13	BCL2 like 13
ENSG00000129473	13.4705	12.7453	12.9458	20.9114	24.4823	21.8813	15.1574	14.1905	16.2908	21.1829	19.7951	19.497	11.796	11.4662	13.1901	21.1283	22.7576	23.4376	BCL2L2	BCL2 like 2
ENSG00000258643	3.38212	0.902637	1.71571	1.26083	2.04121	1.57107	1.09305	0.781424	0.837226	2.47145	2.10778	2.36135	1.08194	2.27166	0	1.57402	2.29074	2.19065	BCL2L2-PABPN1	BCL2L2-PABPN1 readthrough
ENSG00000069399	12.046	10.5283	12.573	63.6682	59.3611	59.6416	13.516	13.6132	15.4031	50.3195	55.2401	52.9612	17.6774	18.021	17.9848	50.0274	50.8104	56.6727	BCL3	BCL3 transcription coactivator
ENSG00000113916	30.4195	30.0842	32.0121	76.9351	77.2875	74.4365	27.5692	30.1558	32.3523	62.5503	57.4313	46.0975	21.996	22.7891	29.23	65.8317	64.4271	68.3341	BCL6	BCL6 transcription repressor
ENSG00000110987	15.0202	14.7608	15.4082	21.8813	23.3889	23.8178	15.8698	15.2391	15.3462	22.7679	20.8813	19.6713	12.59	14.3855	14.8795	23.5172	25.3295	24.9874	BCL7A	BAF chromatin remodeling complex subunit BCL7A
ENSG00000106635	59.1078	57.9569	61.5687	67.5219	71.5809	73.8116	61.1103	61.7911	64.3806	69.5532	65.0361	69.2803	57.7692	53.892	57.4702	65.5288	71.4399	70.0613	BCL7B	BAF chromatin remodeling complex subunit BCL7B
ENSG00000099385	69.0068	69.6344	66.4586	50.3661	52.3564	54.3356	63.8026	66.5198	77.6741	49.1171	52.7598	57.1093	74.9513	70.312	65.8076	49.0974	51.225	53.2557	BCL7C	BAF chromatin remodeling complex subunit BCL7C
ENSG00000116128	12.5188	12.7204	14.938	14.7918	20.1878	20.0032	11.1156	12.872	13.2784	17.5124	16.7133	12.2854	7.55396	11.1089	13.2388	16.8382	20.7307	16.9446	BCL9	BCL9 transcription coactivator
ENSG00000186174	66.6838	58.8674	68.3573	91.3436	96.457	105.406	66.05	63.377	70.2264	102.587	102.818	73.7192	44.3979	66.2672	75.8685	102.417	109.726	100.496	BCL9L	BCL9 like
ENSG00000029363	69.1643	70.899	78.5313	90.4353	79.8321	84.9051	82.5158	73.8211	66.6544	90.7842	81.2019	76.559	67.1516	78.7253	74.1175	86.9814	84.2857	86.1145	BCLAF1	BCL2 associated transcription factor 1
ENSG00000173681	4.14344	5.44137	5.21839	8.01766	7.25866	7.30127	4.99096	4.97863	3.09662	7.83523	7.94412	5.8389	4.10518	4.2068	4.55309	8.70725	8.63088	8.15947	BCLAF3	BCLAF1 and THRAP3 family member 3
ENSG00000197580	0.604291	0.207108	0.167333	0.712335	0.616498	0.596277	0.480821	0.458507	0.206836	1.09807	0.324252	0.743292	0.299273	0.079752	0.231614	0.295391	0.349638	0.099613	BCO2	beta-carotene oxygenase 2
ENSG00000183337	17.6235	15.5792	20.6532	13.6599	15.5168	15.7178	16.6509	16.7693	17.9873	17.7728	17.0388	13.0892	11.4318	13.1135	12.2437	12.4059	12.9437	14.0308	BCOR	BCL6 corepressor
ENSG00000085185	7.73387	6.90276	8.29757	7.6198	8.71726	9.43856	6.86576	7.58262	7.20757	10.0027	9.99031	9.19267	4.21405	5.86007	6.59618	8.10092	9.42563	8.88233	BCORL1	BCL6 corepressor like 1
ENSG00000186716	20.1098	15.8458	17.1032	18.0289	19.3751	15.3695	16.1458	18.3444	19.5031	16.5267	14.5997	16.4833	14.0652	15.8321	15.8474	15.2389	18.8226	14.3519	BCR	BCR activator of RhoGEF and GTPase
ENSG00000074582	31.7107	30.5664	31.7295	22.6993	25.8648	20.7862	37.5347	36.7713	36.1362	22.6882	27.953	27.7188	25.6321	24.4111	25.8608	20.8575	22.3551	21.9329	BCS1L	BCS1 homolog, ubiquinol-cytochrome c reductase complex chaperone
ENSG00000236824	212.662	209.283	124.079	45.646	43.4767	42.8534	167.536	159.026	146.918	19.378	26.0429	27.827	132.142	123.412	94.9512	30.4437	39.3991	25.5276	BCYRN1	brain cytoplasmic RNA 1
ENSG00000161267	117.256	121.329	130.332	101.345	104.253	109.073	113.686	115.819	125.278	86.1786	97.5229	89.9867	126.005	125.016	134.24	116.585	119.309	120.632	BDH1	3-hydroxybutyrate dehydrogenase 1
ENSG00000164039	19.2399	18.8476	20.6193	29.4036	28.0875	28.697	19.37	18.1604	20.8312	28.8183	28.4618	22.1799	20.0869	16.3008	15.9609	35.781	32.5555	32.0215	BDH2	3-hydroxybutyrate dehydrogenase 2
ENSG00000100739	0.061923	0.034598	0.037178	0.487386	0.405355	0.184461	0	0	0.025697	0.250831	0.088364	0.239678	0.097822	0.065046	0.125573	0.248595	0.39518	0.182099	BDKRB1	bradykinin receptor B1
ENSG00000168398	1.31667	1.35403	1.67331	8.33159	7.4837	6.71441	0.737266	0.827839	0.693732	5.43314	5.0044	4.54536	1.35284	1.65775	1.95664	6.45407	6.70256	6.6345	BDKRB2	bradykinin receptor B2
ENSG00000245573	1.50261	2.29266	1.56972	4.74103	3.82565	3.32863	1.09785	0.757681	0.854281	2.49652	3.0412	2.40553	1.67925	0.923926	0.862403	2.48829	2.33119	2.13056	BDNF-AS	BDNF antisense RNA
ENSG00000145734	7.67439	8.97668	8.84182	9.96967	8.01255	8.7154	8.98065	8.32623	5.29427	9.5449	9.18236	7.34106	6.52782	6.9294	8.4545	10.2466	11.0194	10.2913	BDP1	B double prime 1, subunit of RNA polymerase III transcription initiation factor IIIB
ENSG00000166546	0.245538	0.078813	0.216162	0.101916	0.112657	0.27839	0.275098	0.05826	0.136739	0.260317	0.087379	0.286445	0.052998	0.06507	0.187474	0.090404	0.06955	0.103193	BEAN1	brain expressed associated with NEDD4 1
ENSG00000126581	69.5335	66.7709	69.9413	112.877	118.885	112.264	76.0606	74.5726	71.8035	118.079	119.322	113.407	75.625	74.319	72.5763	110.464	114.403	113.539	BECN1	beclin 1
ENSG00000183092	0.886783	0.560826	0.610086	0.05847	0.110938	0.154931	0.552876	0.412407	0.473376	0.093463	0.093881	0.157037	0.153866	0.311402	0.462638	0.280085	0.250529	0.031557	BEGAIN	brain enriched guanylate kinase associated
ENSG00000178409	1.31197	1.37872	1.55398	0.907915	0.874601	0.963475	1.39337	1.3352	1.35398	0.893838	0.984842	0.690821	0.72744	0.773539	1.07301	0.949706	0.801028	0.906841	BEND3	BEN domain containing 3
ENSG00000151917	0.170793	0.198431	0.339148	0.980597	0.463131	0.451411	0.216323	0.193137	0.123374	0.639114	0.583794	1.07171	0.304456	0.306119	0.182852	1.03028	0.737169	1.39801	BEND6	BEN domain containing 6
ENSG00000165626	0.704244	0.302229	0.385521	0.347735	1.59591	0.551176	0.434729	0.370337	0.305551	0.345166	0.398316	0.398846	0.174362	0.132924	0.055238	0.624401	0.551592	0.248497	BEND7	BEN domain containing 7
ENSG00000167995	1.25639	1.49818	3.07789	1.76341	2.02978	2.06414	1.0816	1.68949	1.42383	1.93889	1.65406	2.34541	2.44731	1.42811	2.14808	1.76404	2.18004	2.16435	BEST1	bestrophin 1
ENSG00000127325	0.188157	0	0.01248	0.033492	0.147927	0.070417	0.060883	0.146111	0.133677	0.110696	0.099267	0.021911	0.141074	0.161336	0.030516	0.071639	0.31403	0.450109	BEST3	bestrophin 3
ENSG00000105829	24.0202	25.5547	24.2152	38.3373	39.8011	36.9054	22.3003	21.2482	22.7897	33.1631	33.1809	35.5471	23.4876	20.8521	21.9233	36.0122	36.8003	37.9251	BET1	Bet1 golgi vesicular membrane trafficking protein
ENSG00000177951	35.3941	32.9689	36.9904	32.8926	39.02	37.5296	36.5947	37.2356	37.6166	34.5504	37.553	34.5025	29.9074	33.1451	31.9573	34.1892	35.4439	34.0834	BET1L	Bet1 golgi vesicular membrane trafficking protein like
ENSG00000133169	0.141028	0.399777	0.279582	0.252064	0.491051	0.731518	0.201632	0.230724	0.105873	0.330892	0.108797	0.249891	0.4445	0.485061	0.183608	0.392585	0.742739	0.906675	BEX1	brain expressed X-linked 1
ENSG00000133134	15.519	17.2151	16.5627	24.7665	23.829	21.5306	11.8496	11.4556	9.92757	17.1101	16.7377	20.0889	25.5007	21.7515	22.0383	39.0747	34.1729	39.0985	BEX2	brain expressed X-linked 2
ENSG00000166681	113.385	124.066	125.702	139.929	134.427	137.629	116.711	110.9	92.0668	137.828	136.818	148.795	141.481	125.999	122.839	138.683	133.865	142.834	BEX3	brain expressed X-linked 3
ENSG00000102409	2.26206	2.52122	2.3458	8.2526	7.1143	8.46029	2.50224	2.42015	2.82952	8.8153	8.34173	8.43814	2.09297	2.30946	2.47843	7.48768	6.27354	6.91199	BEX4	brain expressed X-linked 4
ENSG00000184515	2.25564	2.76292	2.63062	1.10271	0.689952	1.55917	2.8092	2.94472	2.2105	1.37667	1.31171	1.63631	2.29393	2.67007	1.70275	1.52828	1.61858	1.68249	BEX5	brain expressed X-linked 5
ENSG00000103429	48.0041	56.348	51.1127	50.3237	49.6597	50.991	53.4742	53.3933	47.8377	47.4463	46.1085	44.2086	39.6966	44.1917	46.9574	48.9107	53.4312	46.9744	BFAR	bifunctional apoptosis regulator
ENSG00000125864	5.81488	5.42209	7.09471	11.4009	12.5365	11.1919	8.2298	7.36885	6.89426	12.47	15.2005	15.0694	9.41466	10.3411	9.56933	13.4319	14.4628	13.1064	BFSP1	beaded filament structural protein 1
ENSG00000170819	13.5632	16.9706	14.5499	8.553	6.96005	8.27443	16.1177	18.342	17.7888	9.94677	11.1745	9.51063	17.5147	15.3236	17.8331	8.76309	8.53184	5.85013	BFSP2	beaded filament structural protein 2
ENSG00000249993	2.86702	2.04199	2.25751	0.210871	0.291021	0.287924	1.39233	2.13107	1.86062	0.167359	0.27555	0.053038	0.533338	0.2723	0.660522	0.163228	0.061724	0.094613	BFSP2-AS1	BFSP2 antisense RNA 1
ENSG00000242252	0.174542	0.051624	0.509559	0.425529	0.137627	0.134943	0.139269	0.246565	0.043567	0.186923	0.156424	0.28505	0.090497	0.150014	0.130446	0.116735	0.354143	0.259377	BGLAP	bone gamma-carboxyglutamate protein
ENSG00000182492	2.14903	1.98941	2.66418	0.18649	0.474213	0.829855	1.22698	1.44542	1.37266	0.098116	0.080826	2.23077	1.22796	1.07749	1.27189	0.179444	0.166628	50.1139	BGN	biglycan
ENSG00000180535	2.43529	2.53563	2.42286	1.10142	1.65544	1.80763	1.94094	2.10213	2.369	1.06828	1.04045	1.5634	1.77195	1.52386	1.46362	0.738539	1.00835	0.778761	BHLHA15	basic helix-loop-helix family member a15
ENSG00000198908	2.61723	2.99683	3.04343	3.66059	4.41359	2.97309	3.36172	3.63085	3.57647	5.56729	4.34912	4.93108	2.87037	2.73271	3.4158	6.09465	5.17885	7.15391	BHLHB9	basic helix-loop-helix family member b9
ENSG00000134107	73.8148	69.4229	74.739	179.313	173.821	174.915	59.8695	60.4599	68.0659	155.169	142.379	125.386	72.3611	74.5605	80.7041	170.398	167.327	183.616	BHLHE40	basic helix-loop-helix family member e40
ENSG00000235831	1.05791	1.4849	1.01701	1.49708	1.92289	1.74018	0.876626	0.919513	0.901236	1.19101	1.38348	1.46113	0.651263	0.611573	0.926917	1.51627	1.73782	1.07143	BHLHE40-AS1	BHLHE40 antisense RNA 1
ENSG00000151746	6.58723	7.69377	7.80146	8.1376	8.42856	9.22763	7.22163	6.65518	6.00507	8.30746	7.44819	7.70723	5.60898	4.68636	5.45965	7.27724	7.43023	8.49321	BICD1	BICD cargo adaptor 1
ENSG00000185963	7.58453	8.08056	8.09129	8.06418	7.58938	7.82754	7.95897	7.64751	7.62505	8.40435	8.14874	7.65052	6.64874	7.45704	8.17637	8.47189	8.82867	9.45283	BICD2	BICD cargo adaptor 2
ENSG00000135127	25.4775	23.7037	25.0831	32.2921	34.3975	33.5112	25.1311	23.5803	23.8908	29.5314	29.4152	28.1033	17.5848	17.397	17.7662	33.5251	32.0817	33.9108	BICDL1	BICD family like cargo adaptor 1
ENSG00000162069	14.2433	12.0461	13.5919	25.8165	25.6671	25.7475	13.6572	13.3003	13.8839	21.3125	23.7642	24.1517	10.4838	9.24803	8.87881	20.7203	19.8528	21.4956	BICDL2	BICD family like cargo adaptor 2
ENSG00000063169	4.5176	4.40875	5.22929	6.24418	8.87279	7.70201	4.79121	6.11032	6.08632	7.59014	7.82794	5.10688	3.82159	5.07413	6.23419	7.77468	8.83888	7.71168	BICRA	BRD4 interacting chromatin remodeling complex associated protein
ENSG00000112624	4.90588	5.17736	6.15469	8.97583	8.58717	9.04448	6.18803	5.73898	5.2403	9.81591	9.10435	7.15504	4.40588	5.55917	6.57622	9.94066	10.0556	9.51336	BICRAL	BRD4 interacting chromatin remodeling complex associated protein like
ENSG00000015475	86.7527	77.3298	85.2525	64.551	68.8957	71.2411	68.9394	67.8894	77.9853	68.3157	64.4698	61.3789	72.5325	61.4274	57.0269	64.341	62.9167	53.9173	BID	BH3 interacting domain death agonist
ENSG00000100290	3.25003	2.83862	3.16209	4.74781	4.87271	4.75918	3.80679	4.46114	3.65701	5.38338	4.63173	4.51959	1.9193	1.26441	1.85404	4.33632	4.01141	4.07633	BIK	BCL2 interacting killer
ENSG00000136717	1.00707	1.31182	1.08883	1.96457	1.14319	1.17487	1.08852	1.05746	0.927378	0.865609	0.923594	0.870626	0.495242	0.601319	0.483666	0.900499	0.885486	1.44946	BIN1	bridging integrator 1
ENSG00000110934	0.175359	0.329029	0.296606	0.057078	0	0	0.379521	0.384623	0.430609	0	0.036256	0.039257	0.18297	0.265829	0.130269	0.024477	0.027426	0.099264	BIN2	bridging integrator 2
ENSG00000147439	15.9347	13.1283	13.5738	17.6353	18.6919	20.1901	13.2232	11.9418	14.211	15.4464	16.4432	17.5531	10.1209	10.7646	10.1615	15.5427	16.8413	15.3054	BIN3	bridging integrator 3
ENSG00000110330	32.6318	38.8561	39.5951	55.714	49.5556	51.2769	39.0589	36.7126	26.1559	47.8375	49.5177	45.3946	32.1645	32.9264	32.6648	49.8575	49.5148	50.2215	BIRC2	baculoviral IAP repeat containing 2
ENSG00000023445	0.840591	1.16406	1.12444	0.487549	0.599921	0.405956	0.856389	1.02201	0.584331	0.597869	0.608835	0.580182	0.456155	0.45126	0.492959	0.589605	0.878026	0.760575	BIRC3	baculoviral IAP repeat containing 3
ENSG00000089685	109.309	113.333	113.164	41.6043	43.3384	43.3836	108.143	113.082	128.675	41.7657	43.5804	43.8072	98.1093	89.4885	90.8165	47.1305	48.2302	46.0854	BIRC5	baculoviral IAP repeat containing 5
ENSG00000115760	11.0949	10.2029	13.0388	14.3373	12.3482	14.6788	12.5709	12.5942	11.0866	15.4094	14.3746	11.9074	10.1216	10.3115	12.7621	16.4605	15.0476	14.886	BIRC6	baculoviral IAP repeat containing 6
ENSG00000101197	0.925982	0.596689	0.384317	1.20764	1.91287	1.74723	1.04401	1.42121	1.41002	1.29662	1.24545	1.93665	0.893712	0.968615	0.645406	1.28504	1.18463	1.99025	BIRC7	baculoviral IAP repeat containing 7
ENSG00000282851	8.96622	8.25639	6.78277	11.8534	13.1555	12.6618	8.78746	10.3436	8.99195	14.9322	13.3908	11.7848	5.05445	7.31292	6.79771	8.84829	11.9684	13.2815	BISPR	BST2 interferon stimulated positive regulator
ENSG00000134897	16.1596	16.8586	17.1843	22.8823	23.1311	25.6739	16.449	15.5172	9.93183	22.2622	21.7712	21.196	12.9059	13.0246	13.8985	23.8933	25.0483	22.2895	BIVM	basic, immunoglobulin-like variable motif containing
ENSG00000166619	60.1755	59.9944	63.547	74.1973	77.4409	76.7461	62.3603	60.9958	59.139	76.2984	78.5948	77.481	54.5732	53.907	53.176	74.8815	79.5546	76.3583	BLCAP	BLCAP apoptosis inducing factor
ENSG00000197299	9.92403	9.56208	9.02899	2.33936	2.90168	2.68169	8.53108	7.22177	8.00339	3.45672	3.01171	3.47924	7.81609	6.38816	7.19391	3.56399	2.33601	3.31089	BLM	BLM RecQ like helicase
ENSG00000108578	36.4449	41.1276	42.1418	30.2327	28.2239	29.8103	46.7535	46.1209	40.2689	32.4722	34.5925	33.4803	36.5878	37.0097	35.7077	26.3961	27.0354	24.4322	BLMH	bleomycin hydrolase
ENSG00000095585	22.9322	22.528	24.6662	61.2803	59.5568	59.8462	24.2981	23.9359	22.8641	56.8014	57.4311	53.7227	25.514	25.1951	25.4076	60.6095	56.5309	56.0474	BLNK	B cell linker
ENSG00000135441	188.879	202.784	196.867	160.732	165.493	166.507	185.607	190.193	205.094	151.602	161.808	165.044	249.544	217.718	200.649	173.023	181.86	183.576	BLOC1S1	biogenesis of lysosomal organelles complex 1 subunit 1
ENSG00000196072	54.472	62.2405	56.1968	56.7114	51.7208	49.909	59.8893	64.3756	43.5878	53.5958	51.5271	51.8659	58.5999	60.2593	51.2935	64.1193	50.5471	50.319	BLOC1S2	biogenesis of lysosomal organelles complex 1 subunit 2
ENSG00000189114	12.688	10.8791	15.4531	13.8175	15.7864	15.9987	13.4677	12.0549	14.6206	14.5972	15.3954	15.3245	12.5061	12.8604	15.0856	15.1987	16.1178	15.9902	BLOC1S3	biogenesis of lysosomal organelles complex 1 subunit 3
ENSG00000186222	35.9828	31.191	33.1985	32.0702	37.3639	34.019	29.8757	32.8792	41.973	30.5163	29.9044	33.3524	28.2546	25.8698	26.3874	25.4478	28.3941	27.9585	BLOC1S4	biogenesis of lysosomal organelles complex 1 subunit 4
ENSG00000188428	16.5255	18.9155	18.6477	18.1742	17.3919	15.3187	17.8559	16.5079	19.0295	18.497	16.5226	16.7006	15.5318	15.9502	18.2519	18.7904	17.8522	16.7103	BLOC1S5	biogenesis of lysosomal organelles complex 1 subunit 5
ENSG00000259040	0.593152	0	0	0.320966	0	0	0.530417	0.752438	0	0	0	0	0.388128	0.235439	0.840928	0	0	0	BLOC1S5-TXNDC5	BLOC1S5-TXNDC5 readthrough (NMD candidate)
ENSG00000104164	37.592	42.6714	42.1227	47.295	43.9945	47.0369	41.6244	43.1301	39.7953	44.7507	46.9134	44.8323	34.5625	37.8965	37.7436	49.0548	49.9929	46.8809	BLOC1S6	biogenesis of lysosomal organelles complex 1 subunit 6
ENSG00000106605	109.619	119.368	113.921	194.313	198.94	189.131	122.423	124.577	140.715	203.836	193.179	224.647	141.41	136.842	117.789	209.676	201.645	215.54	BLVRA	biliverdin reductase A
ENSG00000090013	273.518	266.299	256.125	328.284	366.23	372.08	255.166	252.812	305.301	302.341	298.075	344.986	323.073	313.216	291.077	333.247	365.43	355.971	BLVRB	biliverdin reductase B
ENSG00000117475	34.1887	42.6516	42.8759	52.7655	47.8158	49.1662	47.5359	45.1673	33.363	54.4246	55.8131	47.2602	37.6783	40.4801	41.6262	51.6873	52.6914	49.1896	BLZF1	basic leucine zipper nuclear factor 1
ENSG00000166780	1.23873	0.796955	1.36734	8.41928	7.76403	7.64921	0.845044	0.98064	0.955832	10.711	9.51766	8.41394	0.806229	0.942229	1.43679	6.81717	6.7854	6.95877	BMERB1	bMERB domain containing 1
ENSG00000104081	4.40139	4.93052	5.14725	8.28083	10.1711	9.1397	5.50537	5.91891	5.91633	8.31335	7.04614	6.75174	5.16738	4.99852	7.06115	8.23582	9.98994	8.83203	BMF	Bcl2 modifying factor
ENSG00000168283	29.5508	38.3209	38.4145	45.8808	36.3645	40.3224	38.2438	40.9494	20.2548	53.9368	47.5636	45.0971	30.9983	30.1622	29.9898	46.7674	47.5741	40.9131	BMI1	BMI1 proto-oncogene, polycomb ring finger
ENSG00000168487	6.93462	6.41734	7.02655	4.52535	4.62535	4.80344	4.9068	5.24492	6.25291	4.58917	4.78186	3.85475	4.71194	6.05188	5.60181	4.829	5.76678	6.06415	BMP1	bone morphogenetic protein 1
ENSG00000138756	6.2798	5.87919	6.02784	6.33116	6.36441	5.47369	6.24913	6.5018	3.27985	6.83366	7.90712	4.89687	4.70232	5.29457	8.58722	8.2752	7.46917	7.5848	BMP2K	BMP2 inducible kinase
ENSG00000125378	23.6693	23.9447	24.928	34.8592	36.2705	35.4768	18.6532	17.5699	20.6399	25.1354	24.2887	25.8568	20.1611	21.7947	21.4506	26.7694	26.6768	30.717	BMP4	bone morphogenetic protein 4
ENSG00000101144	0.659745	0.861155	1.31037	0.850231	0.88937	0.631824	0.841092	0.412138	0.602861	0.911731	1.60565	1.18642	0.624484	0.307939	0.554279	0.261708	0.445688	0.339937	BMP7	bone morphogenetic protein 7
ENSG00000116985	3.61329	3.95237	4.16962	2.68057	2.58639	2.62031	3.84915	3.73674	3.96383	3.06171	3.33036	2.97897	3.61796	3.83481	4.2063	2.6612	2.94047	2.84962	BMP8B	bone morphogenetic protein 8b
ENSG00000164619	1.04021	1.16624	1.98188	0.070641	0.124613	0.129084	0.909395	1.27569	1.06412	0.016998	0.053858	0.081094	1.18422	1.22436	1.24705	0.183074	0.212928	0.326043	BMPER	BMP binding endothelial regulator
ENSG00000107779	28.0616	32.3301	34.3772	39.7754	40.5838	40.9287	30.0525	29.829	20.5656	40.8644	36.4141	35.2065	27.0418	29.3945	33.4171	41.0443	44.422	40.4198	BMPR1A	bone morphogenetic protein receptor type 1A
ENSG00000138696	1.25673	1.40501	1.67193	2.02137	2.42438	2.70948	0.955011	0.991649	0.828042	1.77902	1.48104	0.957484	0.668416	0.466764	0.557278	0.707447	1.17839	0.708768	BMPR1B	bone morphogenetic protein receptor type 1B
ENSG00000204217	11.6016	13.1144	13.8729	19.4421	18.1144	19.0824	12.9251	13.2826	10.5407	21.6867	19.7631	14.6715	8.90038	13.1172	16.6117	22.1691	23.1866	22.9942	BMPR2	bone morphogenetic protein receptor type 2
ENSG00000165733	25.1034	22.7745	24.1841	18.8976	20.9101	19.95	23.6518	23.6614	28.4466	20.3029	20.2818	19.9996	19.7919	22.1737	22.5051	19.9213	20.1938	20.6491	BMS1	BMS1 ribosome biogenesis factor
ENSG00000204177	2.38677	2.70152	2.35855	3.24423	2.61375	3.30775	3.02733	2.46907	1.48478	3.25555	3.61364	2.25323	1.35756	1.46249	2.03971	3.89404	3.45021	3.0247	BMS1P1	BMS1 pseudogene 1
ENSG00000271816	1.85746	1.75196	1.59572	2.47865	2.40466	2.93352	1.11532	1.62646	0.614874	2.5125	2.22843	1.40032	0.778171	0.54999	0.826288	2.93817	2.18384	2.98272	BMS1P4	BMS1 pseudogene 4
ENSG00000242288	0.53768	0.131503	0.601072	0.7635	1.18169	0.931977	0.57113	0.1704	0.810693	1.0819	0.988548	1.08173	0.248	0.34378	0.2942	1.14125	1.51562	1.23109	BMS1P4-AGAP5	BMS1P4-AGAP5 readthough
ENSG00000164603	2.09838	3.80691	2.7227	4.04164	3.82633	3.74942	2.69364	2.65517	1.53026	4.16078	3.691	3.48374	2.28784	2.63982	2.83454	4.30978	4.36009	4.40916	BMT2	base methyltransferase of 25S rRNA 2 homolog
ENSG00000113734	23.7883	25.5844	24.9859	18.1155	18.1767	18.4452	25.6628	23.9697	24.0757	15.0594	18.5595	17.4981	21.2418	20.3111	20.4731	19.5348	17.6689	17.5206	BNIP1	BCL2 interacting protein 1
ENSG00000140299	40.1879	45.8021	48.5196	52.8832	52.1541	53.7303	46.7298	46.4273	29.6047	54.1741	55.1591	45.9652	39.8113	38.6014	39.5186	54.5765	57.4359	50.5255	BNIP2	BCL2 interacting protein 2
ENSG00000176171	29.0946	31.6932	27.9872	40.7572	40.9733	41.1493	28.2235	26.6379	25.9097	33.8512	34.7911	35.1202	20.1368	21.1355	20.9734	31.8184	30.6639	30.8789	BNIP3	BCL2 interacting protein 3
ENSG00000104765	52.5425	55.2833	58.9601	56.3803	58.3925	52.0931	53.9903	51.7676	49.2643	57.8589	52.4172	51.2782	45.5192	48.3118	52.4507	57.262	57.6783	61.2083	BNIP3L	BCL2 interacting protein 3 like
ENSG00000163141	65.5989	66.5381	63.9516	140.091	140.619	133.381	68.2603	66.1981	67.0268	132.453	132.939	133.615	78.9437	79.8158	81.5493	136.019	138.647	144.263	BNIPL	BCL2 interacting protein like
ENSG00000144857	3.28861	2.27594	2.45162	2.70756	3.49978	3.19043	1.98112	1.83171	2.0652	1.41362	1.39807	1.5736	2.36084	2.72163	2.7464	3.1439	4.1648	2.61423	BOC	BOC cell adhesion associated, oncogene regulated
ENSG00000145919	92.0842	92.9962	93.7318	58.623	57.0782	58.2994	86.335	84.6757	77.1683	54.693	56.0165	56.9929	91.2157	82.6662	81.4039	62.3979	61.0806	63.4831	BOD1	biorientation of chromosomes in cell division 1
ENSG00000038219	8.2471	8.83915	7.71262	11.1216	10.0003	9.89723	9.26521	7.96641	7.34126	10.7739	12.464	9.63079	6.5532	6.66857	9.7123	12.5649	11.332	13.4902	BOD1L1	biorientation of chromosomes in cell division 1 like 1
ENSG00000176720	33.2362	33.6006	33.9975	36.9781	37.0674	37.7938	30.7116	34.2798	36.4164	38.9221	37.4165	37.5687	32.7745	32.0974	30.9465	33.6188	41.6342	39.5715	BOK	BCL2 family apoptosis regulator BOK
ENSG00000178096	44.025	37.2656	38.9186	49.8378	54.1606	49.6292	40.9239	38.9756	42.6151	39.7452	40.2645	46.4421	36.4879	35.2283	30.5893	43.6683	40.2612	45.5615	BOLA1	bolA family member 1
ENSG00000183336	8.14833	8.06553	9.51919	7.58598	4.76513	5.33537	8.23577	10.963	11.0397	7.77354	7.58791	10.9907	7.19871	7.12256	6.74626	4.04793	4.05136	4.95044	BOLA2	bolA family member 2
ENSG00000261740	59.1806	67.539	61.6192	42.4599	41.805	43.349	73.6464	71.7012	83.6348	53.4992	55.9442	52.3538	57.6075	56.5929	52.3995	39.7697	41.8158	40.1509	BOLA2-SMG1P6	BOLA2-SMG1P6 readthrough
ENSG00000169627	232.274	228.751	218.836	144.265	163.277	161.213	258.561	249.619	327.141	172.08	179.337	199.505	217.786	197.94	191.339	134.846	155.48	150.714	BOLA2B	bolA family member 2B
ENSG00000163170	71.5782	73.7074	73.1464	63.27	61.0175	59.7458	79.8592	74.4829	85.5872	63.8101	62.3946	64.6215	80.2119	71.0551	69.111	56.3223	57.7203	59.9773	BOLA3	bolA family member 3
ENSG00000225439	1.21171	1.21494	0.936519	0.906816	0.863837	1.05444	1.19142	1.26423	1.03749	1.07921	1.17498	1.00735	0.815686	0.95786	0.896294	0.581714	0.626258	0.48998	BOLA3-AS1	BOLA3 divergent transcript
ENSG00000261236	53.992	48.398	53.6559	22.1127	23.5828	25.3231	52.1939	52.8965	60.096	23.7352	25.9843	25.3408	47.435	47.3653	42.1297	18.976	21.5202	21.5941	BOP1	BOP1 ribosomal biogenesis factor
ENSG00000136122	10.3445	10.9984	12.4694	6.16669	5.93206	5.42792	10.7871	11.3308	8.10004	5.92825	6.05699	5.07765	8.42466	8.00878	8.22098	6.59561	6.17131	7.14647	BORA	BORA aurora kinase A activator
ENSG00000165714	5.64926	5.08913	5.90298	4.06383	5.59774	4.36014	6.91926	5.7484	5.55436	4.4082	4.48651	5.23207	4.19541	3.23965	4.76009	4.20327	4.73984	4.38097	BORCS5	BLOC-1 related complex subunit 5
ENSG00000196544	8.57143	7.88245	8.50895	12.268	12.8776	13.0925	7.60759	8.41556	9.81697	11.2117	11.3841	12.0764	10.7258	9.72469	8.4819	12.159	13.717	13.6219	BORCS6	BLOC-1 related complex subunit 6
ENSG00000166275	27.4975	29.791	26.687	57.1758	57.9483	51.346	29.748	27.482	28.4505	48.2634	46.3196	48.8351	33.5062	29.7323	28.5563	48.4067	53.2234	50.5682	BORCS7	BLOC-1 related complex subunit 7
ENSG00000254901	20.5096	22.2929	20.5901	25.9438	27.7622	28.1429	22.5912	24.5982	26.7366	25.2485	28.2471	27.5593	24.4755	22.0437	20.3021	25.7705	27.7921	27.526	BORCS8	BLOC-1 related complex subunit 8
ENSG00000213999	0.599186	0.995099	1.79278	0.703759	0.115615	0.567197	0.191135	1.49449	0.876177	0.077534	0.286731	1.39598	0.154968	0.194859	0.203983	0.268702	0.690919	0.943082	BORCS8-MEF2B	BORCS8-MEF2B readthrough
ENSG00000172331	14.5066	16.7641	17.9849	25.0773	24.5773	25.3501	14.5629	15.3252	11.6502	20.3436	21.9711	19.0965	17.2683	16.3226	16.7144	24.5105	24.5232	21.622	BPGM	bisphosphoglycerate mutase
ENSG00000137274	34.5121	38.7206	39.7914	29.2603	29.0596	33.6932	36.3983	37.3295	34.3039	30.3587	29.2516	31.6437	37.8649	36.8611	33.9025	33.8415	32.2559	35.2852	BPHL	biphenyl hydrolase like
ENSG00000162813	68.1281	80.7407	74.5477	105.149	108.082	103.816	77.8409	80.0874	65.7611	95.1727	92.0772	100.743	71.8637	74.8893	74.3323	106.342	113.787	104.673	BPNT1	3'(2'), 5'-bisphosphate nucleotidase 1
ENSG00000171634	36.922	42.1695	44.9178	48.329	46.6138	48.5325	43.6535	38.7268	30.1108	59.1347	53.9546	37.1556	28.1357	36.7894	41.2796	60.5795	56.4109	53.121	BPTF	bromodomain PHD finger transcription factor
ENSG00000157764	5.10236	5.34605	5.91164	5.13212	5.04154	4.81095	6.49069	6.33833	5.19791	5.06476	5.34198	4.81203	5.50559	5.51961	6.17955	5.81926	5.62723	5.83314	BRAF	B-Raf proto-oncogene, serine/threonine kinase
ENSG00000089234	14.0417	16.1874	17.6112	21.3915	20.0967	19.1006	18.7804	19.418	15.7765	24.1188	24.4516	22.2252	15.9901	17.7679	17.8285	23.0151	22.4962	22.5548	BRAP	BRCA1 associated protein
ENSG00000106009	40.2396	38.0065	43.2378	30.304	32.0292	33.2293	41.1695	43.1727	48.4837	32.1962	31.233	35.0176	34.1659	33.709	32.7565	27.2136	30.4792	29.1154	BRAT1	BRCA1 associated ATM activator 1
ENSG00000012048	29.2513	31.749	34.7469	12.0356	13.1564	12.0666	28.3499	26.3735	23.2613	12.8101	12.0527	13.0606	23.0408	22.2615	25.166	10.06	11.5798	13.2185	BRCA1	BRCA1 DNA repair associated
ENSG00000139618	3.59541	3.42029	4.57432	1.02568	1.48122	1.13219	5.89581	4.19634	2.88588	1.49008	1.39919	1.71574	1.7943	2.2087	4.89049	1.34971	1.07675	0.947884	BRCA2	BRCA2 DNA repair associated
ENSG00000185515	30.954	38.2433	38.8308	41.7931	37.7322	40.0069	33.8997	35.9375	25.853	44.9889	42.0793	39.8758	34.7006	36.4816	35.3288	48.2494	45.8036	45.8657	BRCC3	BRCA1/BRCA2-containing complex subunit 3
ENSG00000100425	11.062	8.94002	9.81478	14.7314	15.1853	14.9424	8.75013	9.58991	9.54817	12.8281	14.3586	11.6276	8.75713	7.72416	8.47676	13.1473	13.9003	13.0982	BRD1	bromodomain containing 1
ENSG00000204256	105.754	108.174	116.138	112.883	127.787	125.025	118.524	111.996	112.746	120.378	118.932	104.249	81.687	85.7084	95.0424	122.398	130.954	124.195	BRD2	bromodomain containing 2
ENSG00000169925	13.7179	12.8588	13.9636	20.8151	21.6011	21.7172	13.5526	11.9657	13.1718	18.4093	18.3005	15.0493	10.3695	11.5687	12.1771	19.3623	19.3024	18.7596	BRD3	bromodomain containing 3
ENSG00000235106	42.8204	39.0141	42.2975	37.9723	45.3104	42.8603	41.5746	39.7289	42.631	44.1201	41.02	38.7985	35.6708	38.2401	39.8785	35.0351	38.866	35.503	BRD3OS	BRD3 opposite strand
ENSG00000141867	16.1661	18.7172	20.1692	17.4281	17.6007	18.9516	17.6241	18.9416	20.1003	20.1729	17.7536	15.0427	11.1607	13.2154	18.6515	16.7983	18.2982	18.6694	BRD4	bromodomain containing 4
ENSG00000166164	37.0574	43.6092	48.6012	43.3392	45.3303	45.0522	44.138	45.144	42.4517	43.9985	42.1356	45.7116	35.4261	38.4415	41.5111	42.8292	50.416	48.2426	BRD7	bromodomain containing 7
ENSG00000112983	40.2326	41.0917	45.3172	56.1116	51.7631	53.346	54.3713	46.8318	41.3916	54.6041	52.7192	42.0954	31.3086	30.786	40.8	57.5333	67.8894	58.0616	BRD8	bromodomain containing 8
ENSG00000028310	26.4148	25.1676	22.3138	21.5308	25.4594	23.5319	27.0012	22.3653	24.318	24.5026	23.1837	19.4523	16.0604	16.9124	20.4135	22.4661	25.5334	21.91	BRD9	bromodomain containing 9
ENSG00000185024	34.3872	31.7826	37.265	30.8675	34.4362	34.852	34.9987	35.0805	42.5007	32.5531	34.0763	35.8282	33.0955	36.6674	33.2927	35.7832	35.3908	34.7955	BRF1	BRF1 RNA polymerase III transcription initiation factor subunit
ENSG00000104221	20.2672	19.8842	19.2483	21.0112	23.7006	21.3345	20.6833	21.6195	24.0439	20.5889	19.267	18.593	18.3328	18.8789	16.879	20.5021	20.3034	22.2865	BRF2	BRF2 RNA polymerase III transcription initiation factor subunit
ENSG00000164713	31.3425	33.9112	35.0062	67.8011	69.9398	70.9527	30.7646	29.6513	33.3219	69.021	68.6232	76.9235	32.507	31.0216	31.6382	82.4022	83.3353	97.0188	BRI3	brain protein I3
ENSG00000184992	47.3671	53.0669	59.5189	27.9703	28.8068	27.9958	51.3273	49.7679	54.6455	27.0894	24.4077	22.0189	33.4733	36.4119	40.231	25.5786	24.792	23.6517	BRI3BP	BRI3 binding protein
ENSG00000182685	4.41827	3.24266	2.59702	4.00436	4.66092	5.06739	2.11774	3.75358	2.10405	4.10048	4.39403	4.61054	3.37868	2.3137	1.85906	3.20701	3.41815	4.45884	BRICD5	BRICHOS domain containing 5
ENSG00000078725	0.163771	0.104256	0.226701	0.123377	0.142676	0.315584	0.118417	0.101394	0.092841	0.120967	0.203495	0.180722	0.029904	0.041102	0.01924	0.066404	0.044953	0.195667	BRINP1	BMP/retinoic acid inducible neural specific 1
ENSG00000162670	0.221271	0.165102	0.261261	1.40217	0.956447	0.823621	0.073093	0.204575	0.15352	1.24088	1.3578	1.26286	0.22971	0.236502	0.16479	2.05098	2.77091	2.41582	BRINP3	BMP/retinoic acid inducible neural specific 3
ENSG00000136492	8.72654	10.3521	10.6606	4.56745	3.83262	4.78302	10.0417	9.53549	6.27986	4.51137	4.99673	3.30488	7.03569	8.31168	9.3948	4.62032	5.38751	4.19855	BRIP1	BRCA1 interacting protein C-terminal helicase 1
ENSG00000113460	57.9933	64.4096	58.5983	37.617	38.9916	37.3418	65.2462	62.3203	61.7828	39.582	38.5924	42.7773	48.1619	45.3449	46.8814	34.7663	34.9254	35.0237	BRIX1	biogenesis of ribosomes BRX1
ENSG00000254999	275.286	307.6	306.183	387.503	374.904	382.464	266.25	273.737	257.957	343.526	352.905	336.806	303.759	302.893	285.392	384.556	380.68	368.296	BRK1	BRICK1 subunit of SCAR/WAVE actin nucleating complex
ENSG00000174744	84.9127	81.7183	85.0254	76.5611	80.8679	80.1809	84.0093	81.2497	93.3808	69.852	72.9164	75.1076	83.2468	80.924	71.9562	70.7101	70.7197	70.9374	BRMS1	BRMS1 transcriptional repressor and anoikis regulator
ENSG00000100916	14.4487	18.2663	18.2726	21.7368	18.7685	18.5698	18.9271	18.3821	13.5018	20.2023	19.2726	19.4742	17.2209	16.5316	17.5319	21.7169	19.2937	19.6976	BRMS1L	BRMS1 like transcriptional repressor
ENSG00000162819	39.5859	50.1243	50.4336	66.7425	64.8856	68.8501	44.909	45.4126	36.3864	70.4612	64.5205	58.3417	37.0844	44.9236	48.3524	64.8613	70.4759	64.602	BROX	BRO1 domain and CAAX motif containing
ENSG00000156983	7.35624	6.61169	7.83989	7.356	7.6319	8.47787	7.82194	7.55093	7.64761	7.46021	7.33352	6.43839	5.5052	6.30486	6.68142	7.82586	8.12701	7.22402	BRPF1	bromodomain and PHD finger containing 1
ENSG00000096070	19.5455	16.7856	18.5813	26.2239	27.0436	26.8731	18.0923	16.1448	18.5334	26.1847	29.0685	21.6715	13.6152	15.768	16.8262	26.2763	27.6504	27.2125	BRPF3	bromodomain and PHD finger containing 3
ENSG00000160469	4.28393	4.36483	2.35286	7.60819	12.1805	8.30812	5.76107	3.05331	3.27905	7.56059	7.2451	8.82199	3.73734	3.7045	4.05705	9.80082	9.1674	9.25067	BRSK1	BR serine/threonine kinase 1
ENSG00000174672	0.921373	1.4527	0.970612	0.827295	1.36058	1.00258	1.21115	0.588317	1.4081	1.86337	1.07562	1.58919	0.409609	0.480206	0.815411	0.590055	0.92495	1.00138	BRSK2	BR serine/threonine kinase 2
ENSG00000185658	25.5384	29.7395	31.8029	31.4517	30.2634	30.7511	29.4883	26.7822	20.748	32.1171	31.9219	26.3556	23.3544	24.3445	28.9054	37.0848	37.626	34.1147	BRWD1	bromodomain and WD repeat domain containing 1
ENSG00000255568	0.689784	0.520625	0.581388	0.349243	0.330372	0.475327	0.388889	0.413879	0.350497	0.099796	0.495958	0.331779	0.33215	0.549571	0.38988	0.100827	0.44121	0.29769	BRWD1-AS2	BRWD1 antisense RNA 2
ENSG00000165288	1.82216	2.15112	2.32446	2.5198	2.9944	2.32657	2.17388	1.91962	1.97576	2.91964	2.6774	1.99124	1.15169	1.4904	1.84337	2.69391	2.97115	2.63921	BRWD3	bromodomain and WD repeat domain containing 3
ENSG00000168000	63.6373	76.2476	70.5256	63.6505	69.5346	77.0384	60.8943	68.4403	70.0468	65.315	78.2493	70.1913	76.6363	60.8911	58.7113	49.0213	53.6687	56.253	BSCL2	BSCL2 lipid droplet biogenesis associated, seipin
ENSG00000160058	33.3054	34.123	35.52	60.8851	64.3558	64.6833	34.3374	33.2036	37.098	60.3974	60.2458	53.7286	30.8237	34.202	35.5506	58.8664	64.6845	64.1444	BSDC1	BSD domain containing 1
ENSG00000172270	486.444	448.741	495.198	270.675	280.592	304.356	434.429	450.626	527.949	284.131	294.674	279.789	387.257	419.964	393.36	260.236	273.692	260.694	BSG	basigin (Ok blood group)
ENSG00000119411	32.4022	29.4915	33.0267	29.5061	31.9964	30.8949	27.495	30.3009	34.3909	28.0441	27.9981	28.9588	26.0333	27.4515	26.8144	28.1021	28.8952	29.2829	BSPRY	B-box and SPRY domain containing
ENSG00000130303	192.518	188.023	213.61	178.079	191.918	178.241	214.167	233.638	267.453	193.781	208.507	229.875	199.494	191.241	179.927	155.646	152.172	162.827	BST2	bone marrow stromal cell antigen 2
ENSG00000095564	13.0922	13.762	15.2782	17.9459	16.4151	17.6206	16.2784	14.8554	10.7493	18.5106	19.1588	12.3843	9.67923	11.9201	13.353	19.2591	20.6205	17.5282	BTAF1	B-TFIID TATA-box binding protein associated factor 1
ENSG00000064726	38.9755	49.3022	49.3807	46.4969	37.4453	43.3606	51.489	51.073	32.397	47.0266	46.1019	40.0234	47.0738	46.2281	44.3502	45.8507	47.8139	45.0089	BTBD1	BTB domain containing 1
ENSG00000148925	16.7978	19.9562	18.8657	23.2751	21.5704	20.6518	20.784	19.437	13.9064	22.1121	22.0878	21.1417	17.5637	19.3178	19.7369	24.9681	24.0214	24.3313	BTBD10	BTB domain containing 10
ENSG00000151136	0.208058	0.120269	0.296602	0.460419	0.519207	0.607204	0.132247	0.130956	0.232764	0.286196	0.206973	0.194965	0.308993	0.328156	0.309582	0.448175	0.446957	0.417977	BTBD11	BTB domain containing 11
ENSG00000133243	48.4873	46.0996	47.7325	49.3558	52.2982	53.1958	48.2936	49.7929	54.4907	49.9306	53.0267	51.6055	45.3193	45.9239	44.1064	46.6753	46.0684	47.3514	BTBD2	BTB domain containing 2
ENSG00000132640	10.4318	12.1646	11.9735	12.7112	12.4816	12.4025	11.5974	11.3819	9.29351	11.5539	12.5583	11.387	7.17394	7.03312	8.38777	11.1658	11.55	10.4479	BTBD3	BTB domain containing 3
ENSG00000184887	73.3711	71.6448	72.0255	62.2147	66.574	66.561	73.2447	76.3799	82.7875	61.8209	63.6485	69.7994	78.628	79.599	73.458	65.2537	66.8293	64.5683	BTBD6	BTB domain containing 6
ENSG00000011114	10.853	12.5248	13.8543	17.713	17.3438	16.5279	13.8684	14.2426	11.819	19.8892	19.4411	16.0597	11.8697	13.973	15.695	20.4334	22.2203	20.2797	BTBD7	BTB domain containing 7
ENSG00000183826	4.87865	5.13065	5.36866	6.90972	6.78162	6.87609	4.95048	4.7158	4.6408	7.28216	6.98684	5.63361	4.91939	6.53518	7.0548	7.56993	9.00786	8.13793	BTBD9	BTB domain containing 9
ENSG00000174808	0.51843	0.934786	0.534228	0.967174	0.902175	1.11585	0.702639	0.417977	0.416989	1.78327	1.11534	1.62452	0.743012	0.654331	0.386693	1.28964	1.15238	1.07661	BTC	betacellulin
ENSG00000169814	23.3582	25.7803	25.4941	38.7632	39.6699	41.6328	25.6577	26.6677	26.9144	40.0294	40.9932	38.0654	27.246	29.3743	29.174	40.17	43.762	40.7535	BTD	biotinidase
ENSG00000145741	928.583	998.643	983.776	790.267	768.124	761.896	1034.49	1009.62	1025.55	822.951	831.021	871.096	1023.83	995.924	898.683	774.769	711.127	739.063	BTF3	basic transcription factor 3
ENSG00000134717	87.5577	93.8214	89.0679	79.0015	81.8903	79.064	84.9892	87.3595	108.482	78.0219	76.4043	73.8322	68.699	75.5135	81.4375	79.0048	80.1176	71.6396	BTF3L4	basic transcription factor 3 like 4
ENSG00000133639	58.1808	60.4265	64.4154	198.019	198.453	189.438	77.3407	89.5463	94.1462	226.645	236.615	204.195	84.9552	90.0204	88.5925	257.783	299.874	257.036	BTG1	BTG anti-proliferation factor 1
ENSG00000159388	4.62409	4.71934	4.43388	5.79519	5.5238	5.90661	4.34579	4.47622	3.94529	5.15526	5.04031	4.87021	2.96776	2.77849	2.92205	5.89925	6.47189	7.79353	BTG2	BTG anti-proliferation factor 2
ENSG00000280594	0.435025	0.298234	0.295474	0.089973	0.145739	0.254168	0.270423	0.446893	0.411877	0.198177	0.167492	0.277547	0.196166	0.09897	0.048136	0.238448	0.314237	0.21211	BTG3-AS1	BTG3 antisense RNA 1
ENSG00000137707	0.166995	0.280878	0.398799	0.107199	0.101584	0.195164	0.288041	0.147716	0.043886	0.303136	0.389441	0.132166	0.292816	0.086331	0.032207	0	0.152247	0.07979	BTG4	BTG anti-proliferation factor 4
ENSG00000010671	0.129375	0.237781	0	0.107979	0.06303	0.214241	0.043874	0.012149	0.171411	0.0889	0.150294	0.500209	0.01306	0.043388	0.232847	0.034652	0.156318	0.098106	BTK	Bruton tyrosine kinase
ENSG00000112763	7.33639	6.86951	6.96289	7.33855	7.61263	7.61349	6.28576	5.86049	5.25655	7.06427	7.68852	7.08711	4.83708	3.88613	4.33379	8.20002	8.12269	7.50304	BTN2A1	butyrophilin subfamily 2 member A1
ENSG00000124508	12.0459	13.686	13.1329	14.7718	17.2654	18.809	11.8017	11.2195	11.5483	17.253	19.1735	15.5227	10.9128	10.4027	10.7066	17.7309	20.6133	18.9536	BTN2A2	butyrophilin subfamily 2 member A2
ENSG00000124549	1.63326	1.23542	1.27394	1.43697	1.21553	1.71049	1.46384	1.07702	1.22722	1.6461	1.70696	1.03671	0.741912	0.552008	1.02561	2.11284	1.95836	1.24455	BTN2A3P	butyrophilin subfamily 2 member A3, pseudogene
ENSG00000026950	6.12172	6.29136	5.26774	10.5926	9.78862	9.60975	6.25258	6.2215	4.3315	10.1148	10.4477	8.16296	4.01441	4.17763	5.39949	10.2587	10.2837	9.87756	BTN3A1	butyrophilin subfamily 3 member A1
ENSG00000186470	5.07294	6.82059	5.5174	7.72627	6.63828	6.23931	7.15361	6.48141	6.83369	7.79142	7.83516	5.82656	5.00675	4.98402	5.13167	8.0332	5.49878	7.35763	BTN3A2	butyrophilin subfamily 3 member A2
ENSG00000111801	0.961512	0.95888	1.29112	2.00682	2.44639	2.62594	1.29321	1.07073	1.16629	3.58615	2.43287	2.32142	1.07746	0.896849	0.667452	2.19672	2.73289	1.83037	BTN3A3	butyrophilin subfamily 3 member A3
ENSG00000165810	2.32168	1.70291	0.858024	1.15264	0.986017	1.09449	1.31491	1.74089	1.27296	1.21494	1.56851	0.88458	0.733953	0.633199	0.882421	1.01959	0.611489	0.830645	BTNL9	butyrophilin like 9
ENSG00000166167	13.2662	17.4831	16.672	16.6193	17.8223	17.1282	14.4618	14.3875	12.8935	20.6787	17.199	12.4386	11.1719	13.7919	15.4217	17.3815	16.8854	18.3263	BTRC	beta-transducin repeat containing E3 ubiquitin protein ligase
ENSG00000169679	23.2808	24.716	25.6496	11.2676	11.5242	12.7399	24.779	26.1314	21.6498	13.6024	13.3867	12.4029	18.9468	19.9334	19.2703	12.5787	13.8613	13.3715	BUB1	BUB1 mitotic checkpoint serine/threonine kinase
ENSG00000156970	39.098	41.4475	40.9893	19.0115	17.6045	18.3121	41.1462	39.2469	34.0227	20.4249	21.1652	18.3712	29.4081	34.2174	35.0719	22.4389	21.1155	21.0251	BUB1B	BUB1 mitotic checkpoint serine/threonine kinase B
ENSG00000154473	120.815	130.256	135.995	114.479	104.169	109.876	133.574	129.543	127.406	102.377	102.035	104.526	106.876	108.574	104.506	108.831	112.446	115.166	BUB3	BUB3 mitotic checkpoint protein
ENSG00000137656	22.7379	22.5906	22.5148	19.6057	20.3213	19.6794	22.7158	22.6597	22.8251	20.2561	19.1681	19.6176	19.4723	19.3213	20.4426	19.2533	19.3944	19.6953	BUD13	BUD13 homolog
ENSG00000071462	192.087	190.406	200.237	133.941	153.442	146.918	180.341	182.76	219.274	133.477	129.428	146.682	184.303	172.124	164.677	123.056	127.881	127.754	BUD23	BUD23 rRNA methyltransferase and ribosome maturation factor
ENSG00000106245	107.072	121.188	111.246	106.223	102.173	101.713	117.162	116.879	127.133	112.018	100.749	110.95	113.413	108.826	101.102	102.425	95.5986	97.425	BUD31	BUD31 homolog
ENSG00000112578	30.9319	30.1385	31.5516	19.1978	18.8226	18.4349	34.3557	33.7341	35.1608	19.1968	19.1972	18.5548	27.5061	28.1436	27.939	16.9294	19.9398	17.8255	BYSL	bystin like
ENSG00000082153	126.735	148.217	160.444	131.941	131.339	128.245	141.544	125.134	143.128	123.082	127.319	111.736	109.222	110.743	117.868	137.065	136.454	131.701	BZW1	basic leucine zipper and W2 domains 1
ENSG00000136261	146.011	157.428	155.843	104.478	105.014	110.473	154.289	154.775	152.559	101.191	105.369	102.264	139.406	139.17	138.18	113.144	113.747	104.888	BZW2	basic leucine zipper and W2 domains 2
ENSG00000237489	0.225338	0.336828	0.382258	0.691336	0.933679	0.578348	0.410005	0.362231	0.254952	0.602249	0.917148	0.709583	0.337865	0.13857	0.233204	0.885651	0.720322	0.792087	C10orf143	chromosome 10 open reading frame 143
ENSG00000165863	2.40358	2.23782	2.12249	2.45482	2.28557	3.19974	2.06712	1.31152	1.45935	1.46425	2.18531	1.88521	1.81156	1.79503	1.68428	2.54814	3.13871	2.29267	C10orf82	chromosome 10 open reading frame 82
ENSG00000119965	6.58806	8.86343	7.12886	8.83413	8.60228	9.86618	8.31212	8.19799	5.70308	7.97242	8.96524	8.55603	6.98736	6.73847	7.697	7.36729	9.53957	8.56887	C10orf88	chromosome 10 open reading frame 88
ENSG00000120055	1.3293	1.61042	1.72704	1.71923	1.73417	2.02893	1.03154	0.999778	1.10926	1.85051	1.88056	1.5436	0.598807	0.681248	0.874002	0.746875	0.723884	0.553228	C10orf95	chromosome 10 open reading frame 95
ENSG00000137720	71.0639	84.6641	83.8028	112.254	109.498	108.733	77.9825	81.4365	60.0608	116.733	102.687	112.518	99.5508	100.022	81.9968	108.36	108.802	117.952	C11orf1	chromosome 11 open reading frame 1
ENSG00000171067	33.3496	33.2814	34.3454	27.3848	24.0299	28.3755	40.0761	38.7805	42.6517	29.2123	30.9931	28.2798	31.0373	32.7085	35.1133	25.8886	27.3694	25.4655	C11orf24	chromosome 11 open reading frame 24
ENSG00000174370	0.775679	1.16882	0.859868	0.425891	0.303147	0.350774	1.13067	0.970515	0.401621	0.784254	0.592254	0.371366	0.544252	0.352989	0.509628	0.419439	0.691213	0.452525	C11orf45	chromosome 11 open reading frame 45
ENSG00000149179	49.4869	43.4301	47.7709	53.8361	54.9069	55.4624	44.1139	43.6295	46.8404	46.54	46.3366	48.3889	48.3385	48.5207	45.8485	45.144	46.3039	46.3047	C11orf49	chromosome 11 open reading frame 49
ENSG00000149300	81.5254	84.1319	86.0291	138.31	137.238	134.685	76.8488	77.055	83.5261	120.751	123.287	119.626	92.4626	86.8308	82.9621	131.733	126.657	135.558	C11orf52	chromosome 11 open reading frame 52
ENSG00000182919	61.8969	69.72	63.3219	105.21	102.965	105.117	68.4184	63.3887	54.2434	107.993	99.9404	97.4323	54.6916	63.5079	59.6897	116.2	107.634	101.754	C11orf54	chromosome 11 open reading frame 54
ENSG00000110696	165.249	187.558	181.76	183.813	181.994	184.543	164.708	163.085	166.641	160.879	156.56	169.328	172.479	178.422	181.6	160.717	159.07	167.549	C11orf58	chromosome 11 open reading frame 58
ENSG00000166323	4.15936	6.04273	6.83975	4.50457	5.02857	3.04185	4.01084	5.99234	2.54751	4.17699	5.09839	3.19447	5.00973	4.38593	3.34577	4.86317	3.45118	3.39367	C11orf65	chromosome 11 open reading frame 65
ENSG00000175573	41.8509	40.3663	41.5034	43.1685	46.347	46.2192	42.1273	42.6053	48.5488	41.353	43.629	43.0253	50.459	43.3773	43.8873	37.9235	45.8306	45.3437	C11orf68	chromosome 11 open reading frame 68
ENSG00000180425	14.4047	13.2306	13.5368	21.0179	24.332	22.8727	13.8453	13.9518	20.1732	20.1312	19.2191	21.0806	13.5913	14.1138	14.308	23.66	24.9159	23.6725	C11orf71	chromosome 11 open reading frame 71
ENSG00000184224	0.064806	0.120931	0.096763	0.164526	0.122396	0.219076	0.085025	0.174886	0.07125	0.177714	0.270654	0.154266	0.210962	0.073611	0.136074	0.080385	0.081373	0.134558	C11orf72	chromosome 11 open reading frame 72 (putative)
ENSG00000166352	26.6618	37.6283	37.9372	49.2539	47.1317	46.3579	35.066	30.1926	22.8003	51.4272	46.4909	42.2045	39.8166	37.1279	38.724	49.5053	39.9239	43.4161	C11orf74	chromosome 11 open reading frame 74
ENSG00000173715	24.3221	26.9815	26.4677	33.8463	29.9171	34.672	24.3288	23.9543	19.3012	27.6651	27.16	27.2152	23.1779	23.9108	24.373	33.6015	34.4618	30.9791	C11orf80	chromosome 11 open reading frame 80
ENSG00000183644	3.9537	4.40247	4.69215	9.80872	9.49076	10.8412	2.85387	3.31902	3.53297	8.2441	8.46967	9.53842	2.14053	2.49999	2.17262	1.65348	1.34138	1.30443	C11orf88	chromosome 11 open reading frame 88
ENSG00000234776	0.251927	0.623721	1.24857	0.389422	0.376403	0.421938	0.662335	0.248118	0.361713	0.361376	0.652722	1.05548	0.366361	0.475157	0.20685	0.216223	0.477211	0.488615	C11orf94	chromosome 11 open reading frame 94
ENSG00000188070	10.3839	8.97204	10.2951	9.80704	8.99418	9.09122	10.01	9.4041	9.21163	9.73719	7.54532	8.30398	7.11978	8.62582	8.72489	10.4122	9.47882	10.5367	C11orf95	chromosome 11 open reading frame 95
ENSG00000257057	1.60368	2.23837	1.2376	2.57447	3.22736	3.14346	0.998803	1.54989	1.34966	3.10522	3.06948	3.46488	0.699931	0.966363	1.31263	0.938556	0.483566	0.224749	C11orf97	chromosome 11 open reading frame 97
ENSG00000278615	238.25	261.507	257.129	208.627	217.367	208.155	255.446	266.009	281.329	227.967	229.204	262.68	263.309	267.81	232.49	196.241	183.868	207.573	C11orf98	chromosome 11 open reading frame 98
ENSG00000139637	91.734	83.2924	88.6567	69.5188	73.0545	72.2275	95.5578	94.7924	111.043	72.2979	76.9431	73.5509	88.1835	82.0728	74.5041	63.9125	64.4204	66.8781	C12orf10	chromosome 12 open reading frame 10
ENSG00000133641	30.8281	39.0734	36.0646	33.4461	36.594	34.1535	41.8528	40.5079	32.4377	39.1189	37.2925	35.9457	30.4789	29.63	33.3346	39.2909	36.1764	31.7677	C12orf29	chromosome 12 open reading frame 29
ENSG00000047621	7.00704	8.61508	6.73875	8.34342	7.74533	10.0795	8.09295	7.13461	7.42118	9.32354	7.79356	7.51874	4.78316	6.46767	8.06595	8.30321	9.07902	8.09175	C12orf4	chromosome 12 open reading frame 4
ENSG00000179088	0.330319	0.119376	0.133372	0.199068	0.142013	0.102213	0.118115	0.047944	0.348437	0.069786	0.086229	0.131268	0.021718	0.084821	0.024359	0.136877	0.11533	0.029522	C12orf42	chromosome 12 open reading frame 42
ENSG00000157895	23.3297	23.8085	25.8191	24.4487	24.6942	24.35	23.1365	25.5027	28.8507	25.7077	23.4075	23.9986	22.2175	26.1086	24.7766	26.0997	26.3776	26.814	C12orf43	chromosome 12 open reading frame 43
ENSG00000151131	27.238	31.8747	33.1032	21.6731	22.4951	21.824	33.6033	31.1689	26.6455	22.1835	25.5919	27.5734	31.4787	31.5911	27.4797	23.4093	22.0947	22.4183	C12orf45	chromosome 12 open reading frame 45
ENSG00000111412	22.013	24.8526	25.8974	34.6	37.4385	33.4866	24.3728	23.8923	30.0393	41.9943	41.6106	39.1287	24.5571	27.8763	29.4557	46.0872	45.7477	44.1082	C12orf49	chromosome 12 open reading frame 49
ENSG00000165805	0.098161	0.096535	0.218208	0.063968	0.213467	0.188409	0.108698	0.135201	0.019691	0.068949	0.175651	0.145668	0.098682	0.122378	0.155981	0.16387	0.174552	0.130475	C12orf50	chromosome 12 open reading frame 50
ENSG00000177627	0.316604	0.328379	0.129312	0.176887	0.111728	0.169138	0.232731	0.123909	0.301964	0	0	0	0.227055	0.093767	0	0.076652	0.429702	0.065158	C12orf54	chromosome 12 open reading frame 54
ENSG00000111678	60.9559	59.4988	55.1404	62.6667	65.7693	66.8813	60.3215	61.177	71.495	67.0249	65.489	74.9247	60.829	55.8066	53.6415	61.6867	60.8235	64.0499	C12orf57	chromosome 12 open reading frame 57
ENSG00000182993	2.09723	2.06069	2.21584	1.50903	1.62502	1.51776	3.39406	2.69445	3.19533	1.61476	2.28614	1.5519	3.23836	2.69934	2.59167	2.25583	1.67542	1.64578	C12orf60	chromosome 12 open reading frame 60
ENSG00000130921	9.5073	10.1113	11.2762	12.0605	13.1636	11.324	10.371	10.106	10.203	12.6776	11.5843	11.8554	10.1219	10.6144	10.4977	12.7422	12.5076	12.6554	C12orf65	chromosome 12 open reading frame 65
ENSG00000174206	8.57893	10.3109	9.15835	10.6284	10.2883	10.5261	11.1443	10.6027	9.50538	11.3406	10.2476	10.3896	8.66988	9.81592	11.17	10.6541	11.5361	11.4743	C12orf66	chromosome 12 open reading frame 66
ENSG00000204954	37.7066	36.0217	33.7933	27.4257	32.134	28.8097	39.627	34.6255	40.2161	29.3135	26.74	32.2812	33.3818	31.5852	30.5369	31.0639	31.9706	33.4315	C12orf73	chromosome 12 open reading frame 73
ENSG00000187510	0	0.045513	0	1.10427	1.86813	1.17779	0	0	0	1.0362	1.44077	1.81831	0.080423	0.058516	0.010163	2.50059	2.14047	1.72583	C12orf74	chromosome 12 open reading frame 74
ENSG00000235162	59.6263	66.0032	72.2655	28.8766	31.1936	35.38	54.9819	56.9772	50.5399	29.5538	35.7519	28.6854	41.2398	41.3644	42.9114	28.3634	28.6876	28.4135	C12orf75	chromosome 12 open reading frame 75
ENSG00000174456	14.0158	15.9934	14.2382	26.3266	22.8278	23.658	16.201	14.839	13.9571	23.8852	24.8192	23.1068	14.4625	14.8323	14.0898	21.4615	24.6898	22.5747	C12orf76	chromosome 12 open reading frame 76
ENSG00000257137	0.234027	0.232819	0.063981	0.173668	0.256261	0.233983	0.348044	0.362786	0.33643	0.381679	0.339909	0.258328	0.056196	0.2321	0.501028	0.591661	0.22344	0.284457	C12orf80	chromosome 12 open reading frame 80
ENSG00000283199	2.53995	1.8369	3.0858	9.99233	10.8723	11.0287	2.57669	2.12609	1.8392	8.74806	8.0479	6.00967	3.95992	5.75469	6.45079	9.96744	10.8645	12.0812	C13orf46	chromosome 13 open reading frame 46
ENSG00000179933	54.5889	56.4436	50.8233	62.9272	60.0669	61.3787	57.7174	59.862	57.2004	65.4885	63.9982	66.5051	52.0322	52.1209	51.3378	64.3421	66.185	63.0762	C14orf119	chromosome 14 open reading frame 119
ENSG00000227051	10.1272	9.67892	10.3216	11.4093	15.2591	14.426	7.50361	7.80791	8.17005	11.7484	10.9842	11.2587	4.77166	5.94545	6.10108	10.2654	11.5623	9.19016	C14orf132	chromosome 14 open reading frame 132
ENSG00000197734	0.275985	0.227834	0	0.308452	0.389496	0.37767	0.20197	0.180964	0.188646	0.219508	0.287061	0.311807	0.233	0.143577	0	0.317765	0.747991	0.276388	C14orf178	chromosome 14 open reading frame 178
ENSG00000179476	5.73984	8.03388	8.24688	11.4086	8.46773	10.2523	8.34793	7.38862	5.0407	11.276	11.0437	10.5642	7.53934	6.66517	7.24897	11.996	10.5307	11.8529	C14orf28	chromosome 14 open reading frame 28
ENSG00000100802	5.74878	5.27259	6.3341	9.115	8.20148	8.26801	7.26898	7.28231	7.22488	9.79619	9.69979	9.22792	7.18878	6.44	7.2102	9.5425	8.9749	9.74046	C14orf93	chromosome 14 open reading frame 93
ENSG00000167173	11.9299	11.5543	11.6521	10.612	9.84618	10.7447	10.4041	11.4854	13.1501	10.8876	10.9146	9.9464	7.69016	9.2859	9.33983	8.64601	8.30392	9.56962	C15orf39	chromosome 15 open reading frame 39
ENSG00000169609	37.1726	36.7572	38.1313	48.5796	50.4113	50.8825	41.652	38.2975	44.5396	46.0338	45.4159	46.1139	39.6909	40.5794	35.1887	43.3242	46.5794	47.5692	C15orf40	chromosome 15 open reading frame 40
ENSG00000186073	5.43317	4.99862	6.05119	6.3305	7.06648	7.36665	6.87479	6.19194	4.86771	8.08456	8.62658	8.02553	4.36172	4.19259	4.61886	5.38884	5.80405	5.41039	C15orf41	chromosome 15 open reading frame 41
ENSG00000166920	2.06188	2.68158	2.55225	11.6565	12.8767	10.3946	2.11478	2.52778	1.79855	16.3003	11.7885	15.4713	3.86724	3.77662	4.07893	25.4194	22.5827	28.7843	C15orf48	chromosome 15 open reading frame 48
ENSG00000189227	3.86694	2.7487	4.35338	3.61383	4.97071	4.11069	4.60671	3.92128	7.41414	3.45519	4.87223	4.12254	3.30589	3.60473	3.44799	3.98348	5.74572	5.22877	C15orf61	chromosome 15 open reading frame 61
ENSG00000188277	0.362785	0.353877	0.299766	0.123752	0.15906	0.237692	0.316393	0.257775	0.205514	0.304055	0.280165	0.10178	0.418498	0.380807	0.343157	0.159171	0.177323	0.228387	C15orf62	chromosome 15 open reading frame 62
ENSG00000261652	11.3976	12.3192	11.4267	15.0022	16.0983	15.0967	10.5286	10.1797	12.18	15.6486	17.1367	17.4856	10.4901	9.56846	8.8244	13.6263	16.7771	14.1324	C15orf65	chromosome 15 open reading frame 65
ENSG00000166455	1.25263	1.37987	1.04811	1.46639	1.43518	1.22855	1.24184	1.44927	1.09865	1.41963	1.25078	1.60956	0.866234	1.07874	0.921562	0.925349	0.989823	1.06309	C16orf46	chromosome 16 open reading frame 46
ENSG00000140688	60.621	56.7861	61.2036	65.5698	67.4175	68.3874	60.48	60.4652	63.5385	62.0456	60.5496	58.8023	55.9827	58.853	56.3132	60.1494	63.093	62.843	C16orf58	chromosome 16 open reading frame 58
ENSG00000125149	20.1936	20.9394	22.3091	18.854	17.3449	17.7473	21.6504	23.3499	20.5309	18.4405	19.2971	17.1215	15.1265	15.4365	18.0298	16.6966	20.2044	17.7491	C16orf70	chromosome 16 open reading frame 70
ENSG00000166246	8.08952	5.35153	7.02026	10.071	12.9572	8.88998	7.14969	5.76508	7.58627	9.64252	9.66453	9.92807	7.59102	8.18194	6.1807	8.94676	6.46795	7.20432	C16orf71	chromosome 16 open reading frame 71
ENSG00000182831	17.8982	21.4488	23.4551	25.0661	21.3645	23.117	20.6383	20.6136	16.0835	23.4697	22.2247	22.6827	21.0488	20.3492	22.1554	23.8523	24.1194	25.2006	C16orf72	chromosome 16 open reading frame 72
ENSG00000154102	117.086	112.535	118.997	66.6156	71.3409	76.1783	102.901	104.36	126.678	54.6692	55.1227	59.9845	101.588	96.1508	92.5095	60.8016	63.4039	62.2619	C16orf74	chromosome 16 open reading frame 74
ENSG00000159761	2.86673	2.43656	2.49824	3.79519	3.03771	3.74302	2.72965	2.14833	2.54788	2.7063	2.98934	3.18713	2.61079	2.37696	1.92904	3.59978	3.05151	3.69223	C16orf86	chromosome 16 open reading frame 86
ENSG00000155330	5.02429	7.82856	5.20538	3.35174	4.56318	3.09181	5.77025	4.2362	5.67156	2.52441	4.43696	4.35659	5.10203	4.28704	6.11879	5.40082	4.93111	5.27888	C16orf87	chromosome 16 open reading frame 87
ENSG00000174109	40.4033	42.6997	38.9226	31.8119	33.6681	31.6228	44.4239	42.6954	45.6308	35.3234	38.5124	37.5783	39.7235	34.425	32.0003	32.5174	31.0345	32.2478	C16orf91	chromosome 16 open reading frame 91
ENSG00000260456	3.64863	4.11589	4.68283	4.35835	4.11439	3.96595	4.2576	4.90238	5.63068	3.96075	3.88981	4.958	5.63645	4.90164	5.07856	3.39327	3.58596	4.46183	C16orf95	chromosome 16 open reading frame 95
ENSG00000256806	1.99941	2.48937	2.08891	3.41362	4.09082	3.8913	2.29457	1.76016	2.20948	2.76163	2.7831	3.18841	2.25763	2.0393	2.10422	3.21633	3.312	3.50643	C17orf100	chromosome 17 open reading frame 100
ENSG00000205710	0.25317	0.184432	0.293776	0.140184	0.125748	0.062404	0.36508	0.302772	0.290426	0.197112	0.271748	0.133221	0.227941	0.086352	0.253616	0.169725	0.139529	0.120677	C17orf107	chromosome 17 open reading frame 107
ENSG00000267221	2.05114	1.91017	2.03494	2.38355	2.73256	2.84166	1.74873	2.30453	1.87434	2.41742	2.43181	2.54865	1.8671	1.47914	1.71534	2.2913	2.52623	2.67752	C17orf113	chromosome 17 open reading frame 113
ENSG00000258315	45.5061	44.1107	46.9224	35.302	37.7108	35.5313	42.5835	40.1889	46.8475	38.5656	38.4685	45.6023	41.6956	38.1472	36.0165	32.3268	35.6904	33.0586	C17orf49	chromosome 17 open reading frame 49
ENSG00000270806	0.181779	0.34227	0.129354	0.442945	0.443543	0.266936	0.25105	0.219275	0.217797	0.103899	0.530535	0.098741	0.347701	0.225246	0.189009	0.279923	0.288508	0.089437	C17orf50	chromosome 17 open reading frame 50
ENSG00000186665	39.3116	37.3078	39.8725	69.3288	68.4288	68.1408	41.027	38.9551	34.7063	68.8714	67.8199	73.6328	34.7536	33.6941	35.7006	76.2852	73.6922	79.1012	C17orf58	chromosome 17 open reading frame 58
ENSG00000141371	0	0	0	0.671097	0	0	0	0.034518	0	0.690589	0	0	0	0	0	0.049885	0.825357	0	C17orf64	chromosome 17 open reading frame 64
ENSG00000214226	2.06879	2.37919	2.19895	2.72736	2.59448	2.5966	2.51433	2.04221	2.70436	3.03745	3.01574	2.40532	1.87206	2.35486	2.8612	2.4327	2.69562	3.0803	C17orf67	chromosome 17 open reading frame 67
ENSG00000108666	42.1316	62.9274	62.4818	56.2168	48.4639	51.5607	67.098	59.3284	33.9259	51.9537	50.5307	55.5045	42.295	42.726	41.695	62.7205	50.4717	57.3636	C17orf75	chromosome 17 open reading frame 75
ENSG00000141219	18.1217	20.0104	19.2306	21.2626	22.8412	21.5944	21.4622	20.7518	16.8577	22.0493	20.2227	19.437	14.5071	16.1101	16.8247	20.3716	21.6085	20.9333	C17orf80	chromosome 17 open reading frame 80
ENSG00000187013	0.36453	0.341425	0.335911	0.219735	0.475185	0.301593	0.191885	0.26784	0.542264	0.259239	0.349261	0.877038	0.377015	0.526636	0.16244	0.335972	0.207453	0.391065	C17orf82	chromosome 17 open reading frame 82
ENSG00000187624	4.43575	3.85932	4.13568	6.79185	6.13533	7.05509	2.85078	2.84392	4.33238	5.17406	5.54482	5.61406	3.17751	3.52661	2.96231	3.55374	4.14352	3.78155	C17orf97	chromosome 17 open reading frame 97
ENSG00000275489	0.061853	0.151644	0.222339	0.135911	0.130091	0.130029	0.201218	0.121346	0.063871	0.178563	0.073061	0.255674	0	0.053653	0.124404	0.176442	0.296263	0.374701	C17orf98	chromosome 17 open reading frame 98
ENSG00000141428	26.244	26.5603	27.0548	26.4393	26.3537	24.8097	27.1955	24.1501	31.1981	22.4994	22.0351	25.9808	23.8122	24.9398	23.4907	24.9056	26.075	24.4729	C18orf21	chromosome 18 open reading frame 21
ENSG00000152242	5.85789	6.6728	7.55901	7.49331	6.98783	8.09593	6.99043	7.62428	6.62059	7.17932	8.19684	7.74117	4.75934	4.71363	6.13152	6.27337	7.66317	7.323	C18orf25	chromosome 18 open reading frame 25
ENSG00000177576	55.8324	79.1926	73.189	125.865	107.909	110.307	73.135	70.08	30.9378	122.349	115.086	111.702	73.6303	69.3173	71.3504	124.872	117.277	110.317	C18orf32	chromosome 18 open reading frame 32
ENSG00000166845	3.66215	4.12818	4.57142	2.26713	2.3971	1.79002	4.30947	4.11722	2.73475	2.33504	2.29584	2.2883	3.29954	4.12547	4.90463	2.75999	2.26293	1.76668	C18orf54	chromosome 18 open reading frame 54
ENSG00000275763	0.259087	0.279649	0.313822	0.146569	0.140723	0.247858	0.232115	0.358913	0.220061	0.215396	0.213914	0.27256	0.095402	0.093629	0.063625	0.145708	0.095982	0.13132	C18orf65	chromosome 18 open reading frame 65
ENSG00000131943	9.16235	6.76369	8.68969	10.2096	10.5102	10.3579	9.7838	9.58076	9.41241	12.3853	12.8453	10.2841	7.60305	7.61984	8.40321	12.1962	12.6847	12.7568	C19orf12	chromosome 19 open reading frame 12
ENSG00000177025	0.350868	0.319783	0.367333	0.611429	0.474319	0.798421	0.165914	0.369189	0.198053	0.486285	0.719357	0.658842	0.237617	0.197081	0.270559	0.524369	0.419517	0.320715	C19orf18	chromosome 19 open reading frame 18
ENSG00000119559	46.4744	44.8206	46.4665	48.5187	50.1317	50.9214	41.3952	46.42	53.9898	46.2236	44.0301	49.3893	43.7089	44.1039	40.0954	42.0886	42.8319	44.0998	C19orf25	chromosome 19 open reading frame 25
ENSG00000167644	166.514	175.125	171.62	225.232	214.703	229.127	143.798	146.123	162.155	204.523	197.235	245.247	205.261	192.524	159.21	245.006	218.426	233.677	C19orf33	chromosome 19 open reading frame 33
ENSG00000214212	0.249954	0.37078	0.099346	0.187759	0.218641	0.328886	0.178711	0.06414	0.200624	0.277551	0.326143	0.371081	0.057316	0.167928	0.2302	0.171331	0.174437	0.167898	C19orf38	chromosome 19 open reading frame 38
ENSG00000105072	4.77172	3.35038	3.67568	3.50358	3.77547	3.62578	4.30382	4.22239	4.49957	2.98632	3.66209	3.94956	2.54189	2.88033	2.74836	3.82911	3.65133	3.06883	C19orf44	chromosome 19 open reading frame 44
ENSG00000160392	14.2117	11.6392	13.1884	10.7338	11.6062	12.1773	13.0849	11.6075	15.2603	9.29594	10.0822	10.4425	11.9767	13.7216	13.6572	10.9038	11.5116	11.4345	C19orf47	chromosome 19 open reading frame 47
ENSG00000167747	75.8907	75.4644	76.7171	24.8402	25.8692	29.4893	65.7021	72.1681	80.9488	26.4745	25.4062	25.7975	57.5642	56.1813	54.6695	21.2743	23.3594	25.2311	C19orf48	chromosome 19 open reading frame 48
ENSG00000104979	154.107	157.21	158.992	148.318	144.232	145.321	162.273	168.964	185.834	152.636	168.341	152.534	155.133	150.14	131.119	127.027	129.071	134.795	C19orf53	chromosome 19 open reading frame 53
ENSG00000188493	6.11465	6.27744	6.38761	8.21634	8.66512	8.63787	6.43646	6.85913	7.51095	7.50455	7.77965	7.0164	6.65419	5.51233	7.27265	7.41373	8.42321	7.82189	C19orf54	chromosome 19 open reading frame 54
ENSG00000132016	2.8037	2.4319	4.57337	1.52311	2.38429	3.47501	2.79321	3.66134	3.85393	2.9917	2.23659	2.50291	2.74311	1.90272	3.62607	2.19656	3.04594	1.65607	C19orf57	chromosome 19 open reading frame 57
ENSG00000183397	1.76898	0.936854	0.726544	1.37447	1.24124	1.53385	2.00887	1.1038	1.11488	1.32259	1.38301	1.18039	0.837093	0.853137	1.23091	1.61645	0.97512	0.973395	C19orf71	chromosome 19 open reading frame 71
ENSG00000221916	1.18341	1.15476	1.40826	3.09687	2.45484	2.7726	1.15708	1.61523	1.84375	3.02642	1.73326	2.14101	0.910656	1.135	0.948748	3.79515	2.64936	3.17025	C19orf73	chromosome 19 open reading frame 73
ENSG00000235034	7.82223	6.95697	6.18116	11.8617	13.5655	13.0927	4.05814	5.53817	7.80234	10.4476	8.73063	10.4218	5.67567	6.45073	5.86725	7.90835	11.8207	12.788	C19orf81	chromosome 19 open reading frame 81
ENSG00000197223	32.6658	41.1022	36.6236	46.5705	43.3741	40.0066	38.58	35.6688	35.8094	43.5986	39.9504	39.7405	36.0831	35.1216	33.4995	53.9765	41.81	45.6084	C1D	C1D nuclear receptor corepressor
ENSG00000106392	11.0863	8.48536	9.47363	12.73	12.408	13.0734	9.44736	9.25612	7.97522	14.8535	14.8309	13.5849	9.3354	8.35228	7.96235	12.134	14.0318	9.38559	C1GALT1	core 1 synthase, glycoprotein-N-acetylgalactosamine 3-beta-galactosyltransferase 1
ENSG00000171155	30.0812	36.208	29.3926	57.0761	55.016	52.3445	27.8109	29.2172	19.0276	48.3818	45.7145	48.7229	37.9336	35.8077	36.0954	58.8189	57.6935	56.3632	C1GALT1C1	C1GALT1 specific chaperone 1
ENSG00000223658	2.07626	1.90097	1.84215	1.38316	1.45761	1.78514	2.35501	2.50022	2.38578	2.16091	2.26932	1.88553	2.13683	2.00413	1.69752	2.15183	2.14874	1.74984	C1GALT1C1L	C1GALT1 specific chaperone 1 like
ENSG00000116922	23.7552	21.2976	25.4304	17.1563	20.2402	20.8736	20.1691	22.1291	20.3642	19.8512	19.718	18.213	15.235	14.9572	13.431	19.0599	18.1701	18.9446	C1orf109	chromosome 1 open reading frame 109
ENSG00000000460	20.6547	26.2423	27.2245	11.1	14.7612	12.6597	23.2736	23.0035	20.2833	11.7401	11.841	10.8518	16.2304	18.3734	20.2433	12.5535	12.4387	10.7788	C1orf112	chromosome 1 open reading frame 112
ENSG00000162817	13.8061	14.6425	15.8124	36.8108	35.9147	36.7541	14.5235	14.6701	14.0146	32.0915	29.2123	30.6241	19.2126	19.9051	19.7803	44.4038	39.8603	43.6135	C1orf115	chromosome 1 open reading frame 115
ENSG00000182795	0.248354	0.410896	0.284244	1.50172	1.39611	1.62765	0.439947	0.279149	0.558236	1.44076	1.71658	1.42606	0.322547	0.248197	0.363878	1.7921	1.34926	1.7208	C1orf116	chromosome 1 open reading frame 116
ENSG00000197982	103.629	101.919	105.911	122.386	127.268	115.162	109.143	111.141	118.024	130.939	134.949	146.973	126.549	116.139	100.854	115.718	100.934	111.084	C1orf122	chromosome 1 open reading frame 122
ENSG00000143633	24.8499	28.6578	29.6053	29.3295	28.8189	27.6525	29.2862	27.9908	25.924	26.4892	27.7199	27.6172	26.6235	24.0575	22.1921	30.7361	26.6025	26.35	C1orf131	chromosome 1 open reading frame 131
ENSG00000228208	0.063024	0.236595	0.118254	0.052322	0.239313	0	0.105547	0.048909	0	0	0.113897	0.561333	0	0.128145	0.252149	0.338691	0	0.179236	C1orf143	chromosome 1 open reading frame 143 (putative)
ENSG00000157330	0.474433	0.584392	0.218726	0.757515	0.731686	1.29427	0.511725	0.145082	0.32438	0.691776	0.830675	0.585314	0.214028	0.035893	0.189427	0.241619	0.026884	0.050175	C1orf158	chromosome 1 open reading frame 158
ENSG00000131591	12.0726	11.1325	11.7897	11.8569	12.0127	11.0385	10.325	10.5904	12.5297	8.88651	10.0907	9.91105	10.1439	10.7182	11.223	10.9146	9.74594	10.5975	C1orf159	chromosome 1 open reading frame 159
ENSG00000143110	0.163644	0.04554	0.124895	0.194478	0.258074	0.282378	0.167419	0.013828	0	0.039655	0.121637	0.303458	0.141309	0.038024	0.036638	0.174261	0.244727	0.144281	C1orf162	chromosome 1 open reading frame 162
ENSG00000215910	0.968628	1.1277	0.638815	1.02595	1.37106	1.22153	0.784034	1.2007	1.11681	1.21525	0.960436	1.22923	0.64892	0.556709	0.310528	0.286854	0.13217	0.497446	C1orf167	chromosome 1 open reading frame 167
ENSG00000198912	12.0214	13.322	13.3737	13.1005	12.8103	13.8083	12.5229	11.8716	12.0382	11.87	12.0573	12.1885	10.9426	10.2436	10.3148	12.7286	12.2051	12.5837	C1orf174	chromosome 1 open reading frame 174
ENSG00000163263	5.54694	6.21955	3.97391	9.58837	9.09527	11.8224	3.55518	3.27192	3.67503	9.03085	9.87528	8.4709	2.80186	3.73428	2.32594	1.57419	1.06413	1.61082	C1orf189	chromosome 1 open reading frame 189
ENSG00000179902	15.0663	15.5418	15.1133	15.5899	15.9032	21.9763	11.2713	11.727	8.44956	14.3508	14.9931	15.2696	5.15592	5.81574	4.2969	3.11001	2.91829	3.11438	C1orf194	chromosome 1 open reading frame 194
ENSG00000119280	24.9969	25.8018	28.5529	22.7376	24.148	24.3048	25.5772	25.3692	26.171	23.6648	22.393	20.6281	22.506	25.589	26.16	24.68	25.7547	25.4134	C1orf198	chromosome 1 open reading frame 198
ENSG00000116667	3.42857	2.20622	2.4592	2.06133	1.60706	2.14778	0.94093	1.00308	0.276193	0.801594	0.810224	0.384453	3.57394	4.81326	4.52102	3.3771	3.01599	3.66378	C1orf21	chromosome 1 open reading frame 21
ENSG00000253313	16.6774	18.3359	19.1918	21.05	23.2619	23.1903	15.8067	15.751	20.4202	19.1741	18.5632	20.5788	16.9403	17.299	17.7873	21.172	19.6879	20.397	C1orf210	chromosome 1 open reading frame 210
ENSG00000142686	8.82747	9.14867	9.13207	9.37225	9.67809	10.0949	8.77919	8.98034	7.95179	10.3566	10.7503	11.0973	9.52575	9.39799	9.42651	10.4889	12.0676	11.4507	C1orf216	chromosome 1 open reading frame 216
ENSG00000213057	0.550761	0.310571	0.208977	0.270354	0.327087	0.383686	0.630528	0.394421	0.353694	0.551401	0.280158	0.325991	0.337075	0.16498	0.329282	0.518583	0.628523	0.304483	C1orf220	chromosome 1 open reading frame 220 (putative)
ENSG00000239887	4.75589	4.4268	5.25776	4.81111	4.40854	4.89817	3.17639	3.60782	3.28833	3.88625	4.01558	3.66008	2.18287	2.41257	2.40557	3.50843	4.17828	3.36274	C1orf226	chromosome 1 open reading frame 226
ENSG00000221953	0.30947	0.524206	0.284671	0.087583	0.109409	0.108458	0.225667	0.260353	0.237572	0	0.061021	0.092245	0.267901	0.223242	0.205783	0.054599	0.110406	0.020992	C1orf229	chromosome 1 open reading frame 229
ENSG00000143793	43.2433	39.9767	44.6119	33.3367	37.6432	33.8733	39.5131	39.8066	48.4378	31.4879	33.3305	33.2351	38.0057	36.3771	34.9648	29.0414	33.1433	31.9011	C1orf35	chromosome 1 open reading frame 35
ENSG00000143612	358.191	398.269	380.022	392.248	402.26	400.2	368.474	379.687	385.924	392.146	370.131	377.644	364.654	366.035	375.34	391.034	393.307	390.049	C1orf43	chromosome 1 open reading frame 43
ENSG00000283580	7.13671	7.33725	5.5429	10.7753	8.43922	10.5843	8.90593	7.87306	7.5539	9.99499	10.3914	8.81734	11.0225	9.35842	7.08484	10.6207	10.704	9.07227	C1orf50	chromosome 1 open reading frame 50
ENSG00000164008	2.99485	2.14143	4.50263	3.39064	4.49132	1.83375	1.94106	2.90666	1.31767	1.68377	2.12437	1.48304	1.14411	3.5786	5.11422	2.48763	2.49741	4.21685	C1orf50	chromosome 1 open reading frame 50
ENSG00000162642	13.6422	14.5304	13.8459	12.7442	11.4978	11.4832	14.7161	15.2527	14.4182	13.4895	12.4604	12.9216	10.4377	11.6585	9.96457	9.57056	9.78822	12.5906	C1orf52	chromosome 1 open reading frame 52
ENSG00000203724	5.62178	6.15302	6.90709	14.1107	14.2912	13.4515	6.32825	6.71355	7.64393	14.5084	11.7317	14.325	7.91684	7.96327	7.02742	20.2	15.6781	13.753	C1orf53	chromosome 1 open reading frame 53
ENSG00000118292	0.774913	0.862205	0.501642	0.940106	1.52537	1.36701	1.35203	1.05588	1.02522	1.06795	2.05077	1.85984	0.355036	0.618507	0.33611	2.09002	1.66149	1.2203	C1orf54	chromosome 1 open reading frame 54
ENSG00000143443	9.82891	9.43271	9.51814	8.92532	8.12317	8.85481	6.84229	6.13727	9.16133	8.51655	7.0639	7.45944	9.38514	7.8828	8.91414	6.18389	8.54425	7.55662	C1orf56	chromosome 1 open reading frame 56
ENSG00000125462	0.509948	0.529659	0.410921	0.978345	0.77776	0.923391	0.637345	0.519899	0.29527	0.940977	0.845652	1.13239	0.285413	0.160495	0.232524	0.737003	0.665771	0.434546	C1orf61	chromosome 1 open reading frame 61
ENSG00000162757	3.84684	4.10523	4.48158	3.4183	3.6802	3.54023	4.16334	4.46021	4.47209	3.76983	3.83845	3.66305	3.85143	4.37689	4.27048	3.65996	3.5745	3.2991	C1orf74	chromosome 1 open reading frame 74
ENSG00000108561	215.389	230.798	224.646	126.912	130.829	128.043	248.834	255.024	243.829	151.656	145.277	154.125	209.211	201.589	194.717	123.65	116.741	118.658	C1QBP	complement C1q binding protein
ENSG00000131094	6.44865	5.92161	6.32603	3.72566	3.55282	4.40164	5.41516	5.54011	7.11334	3.07655	4.23347	3.5655	7.30595	6.98261	6.81662	3.13471	3.23126	2.99944	C1QL1	complement C1q like 1
ENSG00000144119	0.061387	0.129499	0	0.048162	0.129864	0.298321	0.048492	0	0.019535	0.143556	0.09743	0.218069	0.022187	0.036984	0.040762	0.160269	0.287993	0.273303	C1QL2	complement C1q like 2
ENSG00000186897	1.31722	1.21946	1.34039	0.099061	0.109645	0.108374	1.19912	1.06784	1.19544	0.146453	0.328508	0.277386	0.590765	0.476105	0.474425	0.129869	0.108301	0.105652	C1QL4	complement C1q like 4
ENSG00000173918	0.047415	0.237426	0.178412	0.077911	0.062587	0.103498	0.071334	0.023196	0.04181	0.067471	0.132847	0.082111	0	0.026228	0.339955	0.083293	0.162295	0.344789	C1QTNF1	C1q and TNF related 1
ENSG00000184163	1.03545	0.64902	0.614562	0.856983	0.791539	0.653398	0.69508	0.578419	0.612207	1.38131	1.45338	0.652638	0.232275	0.411554	0.610905	1.49563	0.641495	0.451898	C1QTNF12	C1q and TNF related 12
ENSG00000145861	1.01354	1.01765	0.832802	0.909979	1.27303	1.22864	0.760368	0.756681	1.03845	0.999039	1.07634	1.18778	1.02134	0.877112	1.18629	1.08586	0.941437	1.08174	C1QTNF2	C1q and TNF related 2
ENSG00000082196	0.808521	0.636867	1.13949	0.706033	0.499182	0.807512	0.567069	0.555238	0.184243	0.924518	0.69607	0.999222	0.404834	0.605034	0.302047	1.33359	0.898919	22.2502	C1QTNF3	C1q and TNF related 3
ENSG00000273294	0.315954	1.02943	0.079714	0.471091	1.02705	0.43087	0.320697	0.171816	0.329256	0.234162	0.641061	0.550901	0.140499	0.092796	0.18225	0.255277	0.389581	0.923437	C1QTNF3-AMACR	C1QTNF3-AMACR readthrough (NMD candidate)
ENSG00000133466	16.4907	16.6278	17.439	12.7845	13.265	13.5271	9.66988	9.8313	11.0736	12.6418	15.1869	10.9074	12.9702	14.712	15.1142	16.4053	18.7546	13.9542	C1QTNF6	C1q and TNF related 6
ENSG00000159403	0.702947	0.451628	1.831	0.3912	0.485495	0.303191	0.548976	0.670586	0.803218	0.588998	0.521019	0.565301	0.834945	0.640153	0.906838	0.637285	0.559871	1.13991	C1R	complement C1r
ENSG00000139178	3.62723	2.30959	4.0762	5.03181	5.66817	5.65508	2.959	3.47455	3.03178	6.59687	4.97151	4.52317	3.07632	3.31131	3.84906	4.98474	5.50211	5.54494	C1RL	complement C1r subcomponent like
ENSG00000205885	0.620989	0.360974	0.148677	0.412146	0.342742	0.208541	0.208853	0.422401	0.349203	0.493508	0.555876	0.261137	0.12585	0.072137	0.149443	0.343643	0.32047	0.269162	C1RL-AS1	C1RL antisense RNA 1
ENSG00000182326	0.175147	0.175712	1.59905	0.08477	0.415188	0.256717	0.672777	0.457527	0.256641	0.159164	0.441722	0.512604	0.206831	0.093318	0.118081	0.257099	0.17312	0.229153	C1S	complement C1s
ENSG00000166278	0.399697	0.232988	0.300727	0.290488	0.362285	0.262908	0.216205	0.600207	0.595802	0.312353	0.533559	0.504692	0.152458	0.130736	0.155621	0.110771	0.1891	0.143025	C2	complement C2
ENSG00000149609	0.159376	0.251353	0.17609	0.082744	0.107454	0.076466	0.276269	0.328652	0.10136	0.226914	0.154352	0.254932	0.138139	0.140615	0.20522	0.252266	0.139735	0.159145	C20orf144	chromosome 20 open reading frame 144
ENSG00000088854	5.33962	5.38341	5.61771	6.79563	7.07274	7.00612	4.79303	4.32632	3.69294	6.42538	6.42311	5.26075	4.01039	4.24883	5.08698	7.72801	8.57452	7.77453	C20orf194	chromosome 20 open reading frame 194
ENSG00000196421	1.05567	1.19866	0.675034	0.40253	0.58456	0.464624	1.16738	0.742368	0.676475	0.656357	0.479505	0.526841	0.775687	0.51171	0.675424	0.382698	0.354608	0.448097	C20orf204	chromosome 20 open reading frame 204
ENSG00000101220	24.9152	21.9164	23.3524	18.8878	19.3881	20.8131	28.1205	29.8708	32.4345	22.6023	22.5319	23.6185	24.7169	23.446	23.0668	18.292	18.9316	20.6209	C20orf27	chromosome 20 open reading frame 27
ENSG00000124237	0.136411	0.109333	0.268397	0.293713	0.333948	0.23632	1.69973	1.75176	1.65209	3.15312	4.64292	4.1984	0	0.038837	0.045145	0	0	0	C20orf85	chromosome 20 open reading frame 85
ENSG00000196476	8.46274	7.38668	6.65387	11.1249	12.2215	13.3936	7.77385	6.55318	5.73809	10.9212	11.6277	11.5328	4.48073	4.7695	4.56982	9.5978	9.00363	8.06123	C20orf96	chromosome 20 open reading frame 96
ENSG00000160298	13.8599	13.7824	14.6139	8.69234	9.71962	8.18357	11.0854	12.2884	14.5368	8.65743	8.33427	7.0773	8.78724	10.2579	10.8129	6.75961	7.95133	8.26833	C21orf58	chromosome 21 open reading frame 58
ENSG00000265590	6.21099	6.47413	7.5077	7.11453	7.87881	7.35802	7.23334	4.01754	4.02761	8.39016	8.08925	5.27219	0.516132	6.13584	8.21934	7.04074	0.9144	12.7967	C21orf59-TCP10L	C21orf59-TCP10L readthrough
ENSG00000154642	5.29522	5.46528	5.98067	5.33228	5.84594	5.7486	7.09775	7.09015	5.20077	6.81998	5.4636	5.27156	4.35822	4.85067	6.02062	6.26834	6.46064	6.9024	C21orf91	chromosome 21 open reading frame 91
ENSG00000169314	0.352094	0.219484	0.185212	0.262299	0.508201	1.34072	0.203436	0.305371	0.403137	0.635204	1.24186	1.03303	0.206394	0.026452	0.113161	0.079465	0.177992	0.084491	C22orf15	chromosome 22 open reading frame 15
ENSG00000128346	1.47665	1.30402	1.28226	0.978506	1.1274	1.554	1.1066	1.66641	1.1176	1.15807	1.74445	1.62516	1.13672	0.916785	0.723675	0.55787	0.565077	0.776306	C22orf23	chromosome 22 open reading frame 23
ENSG00000100249	0.133409	0.124549	0.203824	0.334225	0.28507	0.569905	0.036861	0.099557	0.068521	0.146211	0.200414	0.232799	0.143816	0.11816	0.169693	0.579052	0.433413	0.370374	C22orf31	chromosome 22 open reading frame 31
ENSG00000242259	22.9262	25.0252	22.6083	24.4028	25.4341	24.2686	24.254	25.7617	26.5294	22.1348	23.3115	22.9216	30.4636	29.2381	31.1403	25.2555	24.4267	23.4008	C22orf39	chromosome 22 open reading frame 39
ENSG00000184208	11.8228	11.654	12.5542	11.2944	11.1548	11.4086	13.6748	12.8452	12.1499	14.0901	13.6233	12.228	11.4659	13.2304	14.1838	12.6851	12.955	13.0311	C22orf46	CTA-216E10.6
ENSG00000157617	14.0606	13.4674	16.0477	20.8346	21.0496	19.5347	16.4537	14.6765	14.2362	21.6521	23.919	20.9042	14.3871	15.4948	15.4685	21.3896	23.4632	22.4099	C2CD2	C2 calcium dependent domain containing 2
ENSG00000172375	38.1123	36.5813	37.2824	71.5421	81.3493	74.4038	33.9753	35.9234	44.4672	67.9717	63.5275	61.1676	31.7287	35.6082	32.4864	63.5147	66.4751	69.9636	C2CD2L	C2CD2 like
ENSG00000168014	13.3156	14.808	14.48	21.209	20.109	18.5183	14.9332	15.0211	14.9771	21.03	18.9238	17.4829	11.5232	14.0514	15.5397	20.2666	20.2045	21.4634	C2CD3	C2 domain containing 3 centriole elongation regulator
ENSG00000198535	0.393468	0.45195	0.583159	2.88677	2.4588	2.37777	0.503911	0.362949	0.588351	2.56136	2.31229	2.31501	0.304866	0.271325	0.589488	2.9426	2.76641	2.76997	C2CD4A	C2 calcium dependent domain containing 4A
ENSG00000183186	0.234725	0.257341	0.264005	0.064406	0.083641	0.082278	0.156987	0.134883	0.164749	0.031757	0.106912	0.015075	0.168889	0.089905	0.127379	0.050694	0.052938	0.055108	C2CD4C	C2 calcium dependent domain containing 4C
ENSG00000225556	0.710937	0.666098	0.518563	1.01906	1.22965	1.17637	0.483652	0.565262	0.841652	1.15639	1.15374	1.23637	0.599178	0.797587	0.776386	0.846751	0.930545	1.08368	C2CD4D	C2 calcium dependent domain containing 4D
ENSG00000111731	13.356	17.3382	16.755	15.2152	14.0011	14.938	16.5247	15.2754	11.1154	16.7312	14.6769	12.5415	10.1324	10.5952	12.5909	14.7162	16.2797	16.0326	C2CD5	C2 calcium dependent domain containing 5
ENSG00000273045	6.25756	6.64059	6.95533	6.79746	7.46181	7.58634	5.40172	6.51323	4.99086	6.76739	7.3081	6.37653	5.66889	6.12754	7.00558	8.70656	8.21022	6.78079	C2orf15	chromosome 2 open reading frame 15
ENSG00000287151	0.960899	1.08048	1.20529	0.693699	0.612363	0.54208	1.74981	1.36597	1.23094	0.559004	0.78851	0.613306	1.03287	1.06028	1.27749	0.595003	0.637364	0.600265	C2orf27A	chromosome 2 open reading frame 27A
ENSG00000115998	6.41734	5.93876	5.06183	9.73429	10.2331	9.71764	5.87474	5.69442	4.75026	8.9765	8.82225	7.73912	4.03731	5.1824	6.17929	8.22695	8.8709	7.36141	C2orf42	chromosome 2 open reading frame 42
ENSG00000135974	13.6727	16.6681	17.9082	15.9066	16.0324	14.6341	17.1437	17.0552	14.4456	15.8654	15.6299	13.8729	12.3766	14.2299	13.8344	15.8005	15.6611	14.7974	C2orf49	chromosome 2 open reading frame 49
ENSG00000150873	0.861236	1.7165	1.53562	2.14632	1.90361	2.23317	1.62725	1.6663	1.83611	1.91684	1.81954	1.96605	1.09595	1.38592	1.43893	0.966233	1.20697	1.23722	C2orf50	chromosome 2 open reading frame 50
ENSG00000168887	35.5179	38.2905	38.7488	32.1142	35.1163	33.6463	43.2534	44.0634	44.1248	37.6967	40.1481	40.9495	40.2427	39.031	39.7753	31.7738	35.1326	37.5105	C2orf68	chromosome 2 open reading frame 68
ENSG00000178074	9.95457	12.8958	12.8937	10.9656	9.89397	10.6977	13.2165	12.1527	8.33622	10.6023	9.82407	9.09319	8.96852	10.601	10.4021	10.0509	9.72067	9.27189	C2orf69	chromosome 2 open reading frame 69
ENSG00000204128	5.69851	7.91049	7.00601	40.8458	39.5792	38.8548	10.0478	9.18964	9.10536	36.0425	32.822	31.7189	10.6349	10.695	12.5432	35.6775	40.0338	39.7127	C2orf72	chromosome 2 open reading frame 72
ENSG00000177994	0.112969	0.129905	0.138727	0.064515	0.17468	0.495447	0.114405	0.226135	0.189087	0.243117	0.231741	0.253967	0.082595	0	0.111517	0.080839	0	0	C2orf73	chromosome 2 open reading frame 73
ENSG00000237651	19.7636	20.825	21.5609	24.687	26.9489	25.4345	20.5949	21.8078	16.8743	23.3149	25.102	27.9305	26.5204	23.7192	21.4653	26.9885	24.329	28.8036	C2orf74	chromosome 2 open reading frame 74
ENSG00000186132	17.7343	18.3211	19.7292	28.2733	27.6518	24.3803	18.4733	18.4649	21.6541	28.0763	21.6579	27.143	18.7303	18.3683	19.6828	29.4009	28.0208	28.6792	C2orf76	chromosome 2 open reading frame 76
ENSG00000284308	6.36666	4.69472	6.3847	4.38744	4.22996	3.78916	5.50885	6.19007	7.53053	4.79988	6.53994	6.72656	5.93028	4.97621	6.13945	3.07893	3.70813	3.27654	C2orf81	chromosome 2 open reading frame 81
ENSG00000228486	4.0674	2.83081	2.11433	7.09669	7.66535	5.75079	3.84154	2.65253	1.9929	5.13376	5.41011	5.25895	1.35485	1.14967	2.34644	6.22525	7.35968	5.92834	C2orf92	chromosome 2 open reading frame 92
ENSG00000125730	2.01197	1.73464	1.64857	3.40646	2.78467	3.17594	1.68973	1.25752	1.44802	3.71255	2.07699	2.62866	1.63129	2.15554	2.18304	2.04333	2.70142	2.43125	C3	complement C3
ENSG00000114405	49.1185	66.3851	65.5257	75.6061	70.9867	74.6044	63.9033	64.8338	60.1857	72.0549	62.8028	64.9471	81.9129	76.383	70.7177	74.0657	71.3558	69.1942	C3orf14	chromosome 3 open reading frame 14
ENSG00000088543	4.20715	4.9421	4.69237	3.02171	3.25389	3.23245	4.07721	3.50749	4.88374	3.29774	2.57917	2.11993	4.46402	4.12541	4.69853	3.20116	3.05138	2.68651	C3orf18	chromosome 3 open reading frame 18
ENSG00000174928	9.33844	12.9738	12.8258	11.7884	11.5928	12.2177	12.2882	11.072	9.59662	11.6055	11.5197	11.7672	10.817	11.5475	10.6016	14.5066	13.3423	14.3918	C3orf33	chromosome 3 open reading frame 33
ENSG00000198590	0.329234	0.411586	0.451196	0.595667	0.697398	0.472726	0.443617	0.488702	0.200407	0.389763	0.705136	0.458377	0.274954	0.097379	0.259467	0.589356	0.478113	0.63082	C3orf35	chromosome 3 open reading frame 35
ENSG00000179021	16.7267	18.7533	18.3964	19.8729	18.3299	20.1449	19.2952	18.0565	16.6388	19.5202	18.9625	20.3992	14.8944	17.3026	17.4573	20.2592	18.5553	18.6026	C3orf38	chromosome 3 open reading frame 38
ENSG00000114529	12.4152	11.9237	12.738	11.4307	11.4787	11.8954	9.7172	10.1883	8.04525	10.9473	8.45818	7.96716	6.2945	6.70302	7.08962	10.985	12.0168	11.1823	C3orf52	chromosome 3 open reading frame 52
ENSG00000188315	2.54273	3.60416	3.09811	5.68925	4.26923	3.3716	4.36377	3.97507	2.97182	5.14923	7.29608	5.38569	1.79223	1.87812	4.18201	5.08819	3.27977	5.95461	C3orf62	chromosome 3 open reading frame 62
ENSG00000163689	5.13549	6.75165	7.32029	5.1963	5.43799	5.24251	6.96554	6.77754	6.1508	5.43844	5.69571	4.79366	5.47734	4.45774	5.18479	4.95769	5.69527	5.05218	C3orf67	chromosome 3 open reading frame 67
ENSG00000187068	0.338717	0.395142	0.450789	0.618339	0.457681	0.514589	0.449818	0.482208	0.358629	0.65287	0.644638	0.564948	0.790102	0.862855	0.828249	0.961148	0.959401	0.987317	C3orf70	chromosome 3 open reading frame 70
ENSG00000180044	0.233483	0.42638	0.38611	0.290657	0.205864	0.388306	0.562582	0.391755	0.406959	0.362176	0.220873	0.240037	0.294327	0.32619	0.347221	0.312941	0.261302	0.341764	C3orf80	chromosome 3 open reading frame 80
ENSG00000244731	1.52441	0.523444	0.432921	2.2265	2.88724	0.987571	2.2817	1.63075	0.985914	1.60335	0.953136	2.61091	1.83074	0.7895	1.41299	2.17861	0.929445	0.776457	C4A	complement C4A (Rodgers blood group)
ENSG00000224389	0.54089	0.292878	0.417881	0.718886	0.403191	0.448034	0.271544	0.601929	0.266015	0.289278	0.786372	0.89394	0.211339	0.027008	0.783406	0.222631	0.929098	0.930051	C4B	complement C4B (Chido blood group)
ENSG00000123843	0.848586	1.04938	1.05201	2.0973	2.24552	2.3706	0.909447	0.668881	0.855516	1.82298	1.50366	2.0185	2.41643	2.32288	2.37387	4.11301	3.24063	4.06492	C4BPB	complement component 4 binding protein beta
ENSG00000154274	93.1366	102.732	103.313	93.4342	92.6242	93.1586	99.4628	100.613	87.8814	100.341	100.05	94.4052	118.807	130.538	128.099	112.053	120.059	110.749	C4orf19	chromosome 4 open reading frame 19
ENSG00000164096	31.8694	38.8278	38.7766	67.5473	64.1218	62.0676	37.4894	38.3778	40.9773	62.644	54.9422	63.0968	46.4445	46.7886	44.1937	59.5826	54.181	56.3602	C4orf3	chromosome 4 open reading frame 3
ENSG00000151470	12.27	12.1666	13.1745	19.5539	18.9541	21.8272	9.54593	13.629	9.85608	17.3678	16.449	20.1449	9.08942	13.4753	10.6733	18.3741	20.9781	21.6728	C4orf33	chromosome 4 open reading frame 33
ENSG00000163633	2.86956	3.39299	2.531	3.0863	3.2148	3.87345	3.21331	3.52226	3.02954	2.77139	3.08966	4.02966	2.63428	3.107	4.01218	4.04056	3.34219	3.84274	C4orf36	chromosome 4 open reading frame 36
ENSG00000285458	0.600672	0.820822	0.778604	0.951125	1.09678	0.858432	0.852929	0.819401	0.291711	1.28969	1.30962	0.928919	0.894005	0.644887	0.704728	0.57179	1.23874	1.16527	C4orf36	chromosome 4 open reading frame 36
ENSG00000205208	9.0728	10.6334	11.258	4.62842	5.11838	5.91142	9.35262	9.6843	7.666	5.57072	5.88644	5.43842	6.06234	7.23326	8.02218	4.62582	5.79741	4.71338	C4orf46	chromosome 4 open reading frame 46
ENSG00000205129	0.896483	0.872874	1.14163	1.69176	2.0507	1.69304	1.08767	0.903792	0.220144	1.77435	1.39979	0.757989	0.527204	0.554827	0.567967	0.842495	0.626757	0.798234	C4orf47	chromosome 4 open reading frame 47
ENSG00000243449	76.0785	81.8603	95.1075	35.7476	47.7951	57.5275	59.5892	78.6327	86.1193	64.055	56.4218	63.2199	78.1669	61.6768	74.0907	26.4933	49.5065	58.7038	C4orf48	chromosome 4 open reading frame 48
ENSG00000106804	3.08387	3.84211	4.49942	5.19379	5.48535	5.09459	3.3274	3.45472	3.0908	5.24478	4.83125	3.68488	2.479	3.233	4.55847	6.3636	6.06468	5.20451	C5	complement C5
ENSG00000197405	0.507818	1.11461	0.191317	0.598773	1.36246	1.61593	1.21111	1.03045	2.01087	1.48086	1.70181	1.47789	0.46104	0.459104	0.77542	0.608934	0.249965	0.713604	C5AR1	complement C5a receptor 1
ENSG00000134830	26.5948	24.8335	26.749	22.1561	21.6196	22.3398	25.6935	26.2685	26.9378	17.3323	16.9709	17.3639	24.6297	25.8211	26.8305	20.1634	20.8804	20.3133	C5AR2	complement component 5a receptor 2
ENSG00000113583	81.6827	91.6039	92.2656	125.312	125.583	129.089	92.278	85.3327	81.3412	116.452	121.7	120.023	77.4532	79.7056	82.2883	127.608	126.617	118.529	C5orf15	chromosome 5 open reading frame 15
ENSG00000082213	23.5779	25.2548	25.9448	28.623	25.1121	27.513	23.7203	30.5553	18.1824	27.1165	28.3992	21.9386	19.0399	21.7663	23.087	30.7129	25.742	25.6346	C5orf22	chromosome 5 open reading frame 22
ENSG00000181904	27.8695	32.7081	30.2715	42.289	34.91	36.0854	32.9461	29.1661	22.3185	38.2035	38.8258	33.9046	25.0793	28.365	27.2185	37.7558	40.1753	36.8005	C5orf24	chromosome 5 open reading frame 24
ENSG00000181751	19.352	24.0772	24.8517	31.4776	29.6007	29.417	23.7764	22.8235	20.6622	26.4715	24.7532	25.5878	18.351	20.8014	20.7495	27.8129	26.375	27.1829	C5orf30	chromosome 5 open reading frame 30
ENSG00000172244	14.5043	15.9163	15.5047	6.89781	6.06801	6.83408	15.8842	14.6203	9.87123	6.78082	7.42333	7.87111	11.4001	10.5864	10.7	7.18731	6.55946	5.98566	C5orf34	chromosome 5 open reading frame 34
ENSG00000186493	85.1426	75.8417	83.7935	64.338	73.6221	78.1656	51.4856	61.6433	75.4684	50.9511	48.9668	61.1158	78.0586	74.4527	73.4544	53.7013	67.329	69.3517	C5orf38	chromosome 5 open reading frame 38
ENSG00000178776	0.230691	0	0	0.32801	0.330289	0.468751	0.084785	0.077252	0	0.205417	0.522982	0.108755	0.082693	0.063006	0.077395	0.398363	0.346279	0.441967	C5orf46	chromosome 5 open reading frame 46
ENSG00000185056	0.063695	0.348941	0.098842	0.092833	0.109446	0.043966	0.047282	0.061159	0.223565	0.067764	0.05683	0.089696	0.174889	0.048428	0.217801	0.086872	0.223228	0	C5orf47	chromosome 5 open reading frame 47
ENSG00000215217	3.74849	4.54421	3.82449	7.03375	7.29411	10.3344	2.93704	3.22209	2.98764	8.08685	9.44162	9.98706	2.67247	3.08761	2.7973	2.2788	1.83228	2.17386	C5orf49	chromosome 5 open reading frame 49
ENSG00000205765	20.6804	25.1934	28.1386	35.005	31.9622	35.2271	24.8074	25.1939	14.531	37.0197	33.6931	28.2946	21.5199	25.9053	29.5058	42.6741	42.8147	40.3536	C5orf51	chromosome 5 open reading frame 51
ENSG00000234511	19.6107	23.8817	22.0457	28.7193	29.9005	27.4381	47.0146	43.958	8.79072	50.2829	51.3853	56.6774	51.2313	42.4158	43.1028	59.6975	57.3297	61.1425	C5orf58	chromosome 5 open reading frame 58
ENSG00000164241	5.20387	7.23137	6.61218	5.89811	6.96878	6.86313	7.03813	7.84668	6.14656	5.74456	5.30742	6.59507	5.48788	4.86643	6.13872	5.79824	5.33335	5.27496	C5orf63	chromosome 5 open reading frame 63
ENSG00000224186	0.57574	0.378472	0.483994	0.924917	1.11245	0.81107	0.413076	0.787597	0.231525	0.618332	0.670968	0.414485	0.409735	0.311252	0.645778	0.823699	0.762665	0.860045	C5orf66	chromosome 5 open reading frame 66
ENSG00000249082	0.414708	0.15053	0.600673	0.070897	0.245072	0	0.118279	0.292099	0.16084	0.081162	0	0	0.109477	0	0.10665	0	0	0	C5orf66-AS1	C5orf66 antisense RNA 1
ENSG00000112539	0.917857	0.640904	0.548423	1.45676	1.79573	1.39625	0.599703	0.222864	0.382022	0.772907	1.90372	1.00235	0.307051	0.129957	0.33926	0.124309	0.058296	0.166893	C6orf118	chromosome 6 open reading frame 118
ENSG00000185127	25.8874	27.7716	31.3481	33.2436	32.4054	31.4862	31.2627	30.2477	28.2675	32.6854	32.0195	31.5455	27.353	28.3268	27.4636	32.6247	32.9802	31.4276	C6orf120	chromosome 6 open reading frame 120
ENSG00000188112	24.4528	22.6809	25.5273	61.0867	66.1279	64.3636	26.4995	24.5228	28.5284	59.5717	59.9624	52.015	29.5429	35.9334	35.7549	60.2981	63.9571	63.6185	C6orf132	chromosome 6 open reading frame 132
ENSG00000204564	19.9558	18.0569	17.9124	18.3382	19.1421	19.4141	20.0331	18.0942	20.5508	18.0382	18.5085	18.2248	16.0635	15.3556	13.8546	16.1815	17.227	19.6523	C6orf136	chromosome 6 open reading frame 136
ENSG00000197261	27.9647	24.8369	24.1441	10.6721	8.46822	9.91566	15.198	11.1104	7.49144	5.43611	5.73859	3.63732	4.49006	2.79723	4.62766	4.22301	4.89351	4.93707	C6orf141	chromosome 6 open reading frame 141
ENSG00000203872	0.269215	0.126754	0.207148	0.20456	0.302438	0.325562	0.467015	0.312221	0.377268	0.551604	0.418473	0.362837	0.191609	0.11323	0.133627	0.72842	0.399751	0.495495	C6orf163	chromosome 6 open reading frame 163
ENSG00000221821	18.9312	15.3231	19.3978	25.5102	31.4024	31.4974	17.4912	16.2423	20.0776	27.2347	30.8579	30.7752	17.78	15.0761	14.1092	26.2111	27.6259	26.8399	C6orf226	chromosome 6 open reading frame 226
ENSG00000204439	25.6285	25.7973	26.6939	29.4431	28.8035	28.5165	26.522	27.4348	31.4416	30.5067	30.3772	30.3152	26.4033	28.1372	26.0284	26.09	26.2363	29.7731	C6orf47	chromosome 6 open reading frame 47
ENSG00000137434	0.650591	0.663891	0.536858	0.738133	0.74763	0.251478	0.642996	0.38969	0.328028	0.273867	0.62902	0.885527	0.512435	0.465593	0.732595	0.324709	0.436656	0.566387	C6orf52	chromosome 6 open reading frame 52
ENSG00000112308	135.804	142.799	157.73	160.085	155.499	159.431	150.861	148.868	116.965	156.707	155.874	156.866	140.713	141.955	143.691	156.357	147.762	149.596	C6orf62	chromosome 6 open reading frame 62
ENSG00000198663	48.5728	49.2477	51.9451	62.9069	68.4111	70.84	56.5522	58.1812	56.3396	81.4701	73.9126	61.7251	42.8685	53.0087	57.9429	71.735	77.0655	69.5205	C6orf89	chromosome 6 open reading frame 89
ENSG00000203711	4.7658	5.17717	5.86077	3.68712	3.93556	4.62056	3.88049	4.24065	5.42011	4.07576	3.37041	3.80811	5.32163	4.8023	4.53563	3.82057	2.69314	5.43218	C6orf99	chromosome 6 open reading frame 99
ENSG00000136197	4.64621	3.33874	2.31594	3.81087	4.39168	4.56111	3.23781	2.60986	7.18317	3.97155	3.86292	4.65791	3.46921	2.85127	2.82952	3.01578	3.78901	4.92938	C7orf25	chromosome 7 open reading frame 25
ENSG00000146576	23.1225	22.0993	23.0342	26.221	27.2421	25.982	26.4238	26.1957	28.587	27.7017	27.3715	28.4123	21.8608	22.5177	22.2852	23.1771	23.9383	25.2087	C7orf26	chromosome 7 open reading frame 26
ENSG00000153790	1.05574	0.929009	1.18284	0.808941	0.631185	0.472432	0.519289	0.62835	1.12081	0.828117	0.899657	0.793934	0.310026	0.429574	0.574593	0.924877	0.302154	0.568683	C7orf31	chromosome 7 open reading frame 31
ENSG00000146540	251.748	241.824	248.623	265.647	273.899	282.183	207.546	209.295	257.452	214.867	232.308	246.496	275.715	264.27	234.168	250.322	232.682	240.181	C7orf50	chromosome 7 open reading frame 50
ENSG00000185955	0.345816	0	0.125738	0.230377	0.220198	0.258134	0.305258	0.102906	0.10934	0.05034	0.123777	0.214641	0.146262	0.303925	0.14032	0.197492	0.223197	0.235365	C7orf61	chromosome 7 open reading frame 61
ENSG00000176919	2.18695	2.54497	2.71219	3.38937	4.03153	4.73836	3.32249	1.62924	1.29805	4.247	3.64496	2.6915	1.19413	1.06484	1.33169	3.18401	2.25384	3.91118	C8G	complement C8 gamma chain
ENSG00000182307	63.992	71.0873	73.0712	57.5734	55.766	57.3504	67.3485	69.3154	67.8895	49.5145	50.8374	49.0783	60.9121	58.665	58.6942	56.0503	52.9538	51.8786	C8orf33	chromosome 8 open reading frame 33
ENSG00000165084	1.42305	1.7019	1.53533	0.421493	0.176439	0.290863	0.80074	1.00734	0.538145	0.094825	0.253654	0.112476	1.47406	1.6133	1.11615	0.125743	0.091166	0.110476	C8orf34	chromosome 8 open reading frame 34
ENSG00000156172	4.4111	5.44031	5.73486	5.01377	4.98115	5.18472	4.53392	4.6281	3.67353	4.68629	5.08646	4.43439	4.28113	4.43996	4.41881	5.16839	5.27045	4.84483	C8orf37	chromosome 8 open reading frame 37
ENSG00000253773	0.506801	1.12448	0.738963	1.06149	0.458005	0.872975	1.31997	1.1536	1.00658	2.0324	0.980533	1.78996	0.685638	0.895207	0.595007	1.49525	0.703415	0.895984	C8orf37-AS1	C8orf37 antisense RNA 1
ENSG00000164743	0.203846	0.272686	0.329226	0.363138	0.17275	0.28717	0.343415	0.221783	0.473731	0.673323	0.690236	0.547773	0.473521	0.395311	0.361696	0.215879	0.319926	0.220123	C8orf48	chromosome 8 open reading frame 48
ENSG00000241852	5.91547	6.14501	5.40031	5.96396	7.01726	6.46145	5.79821	6.07762	6.31362	5.74904	7.28126	5.92914	7.50654	6.73935	6.05307	6.12319	6.98397	6.88091	C8orf58	chromosome 8 open reading frame 58
ENSG00000189376	33.9496	38.1855	35.0768	41.3941	38.5601	38.369	38.8984	44.0921	35.8977	42.5806	38.2424	37.2909	32.4719	32.8431	30.016	40.7928	37.8167	37.3232	C8orf76	chromosome 8 open reading frame 76
ENSG00000213563	43.4095	44.3522	47.0184	31.3429	37.2412	40.7396	44.1026	49.0183	48.3287	38.8319	43.13	40.2234	43.7307	43.8691	43.2619	33.3688	36.0103	35.7846	C8orf82	chromosome 8 open reading frame 82
ENSG00000160345	47.8302	46.8134	50.9081	68.4655	70.9488	72.2469	43.1434	40.7057	47.7099	60.6894	61.9089	66.1001	46.1119	44.881	42.4836	48.5972	53.8729	46.9601	C9orf116	chromosome 9 open reading frame 116
ENSG00000204711	0.564897	0.885041	0.486328	1.65167	1.74768	2.35121	0.50175	0.285113	0.107797	0.701713	1.54475	1.75403	0.440132	0.732628	0.332772	0.223455	0.315703	0.30119	C9orf135	chromosome 9 open reading frame 135
ENSG00000180539	0.308283	0.190949	0.189965	0.17595	0.455654	0.218725	0.138243	0.18544	0.248846	0.2651	0.269123	0.189849	0.114613	0.218801	0.206552	0.386576	0.134909	0.530726	C9orf139	chromosome 9 open reading frame 139
ENSG00000188959	33.2592	35.2828	34.9656	50.4352	48.5946	49.8408	32.6716	31.4672	28.0342	44.2585	42.6553	39.9974	31.1598	32.8674	33.2893	48.6769	50.334	51.1939	C9orf152	chromosome 9 open reading frame 152
ENSG00000171159	117.203	120.595	124.532	98.4972	100.771	103.012	120.702	129.599	143.115	106.529	111.29	113.594	131.939	124.226	99.7304	77.485	86.7649	87.5792	C9orf16	chromosome 9 open reading frame 16
ENSG00000196366	1.21046	0.60406	0.759163	1.2562	1.373	1.78955	0.938114	0.904198	0.677589	0.741141	1.48177	1.01037	0.589205	0.453076	0.433932	1.04505	1.49837	1.1465	C9orf163	chromosome 9 open reading frame 163
ENSG00000164972	1.23811	1.40973	1.34654	1.31603	1.11571	1.78151	0.861434	1.10181	1.07252	0.63337	1.51941	1.89923	1.56489	2.02637	1.13542	0.984592	0.355428	1.36636	C9orf24	chromosome 9 open reading frame 24
ENSG00000135045	17.7512	19.1398	21.1316	10.2143	9.55387	9.43156	20.3438	21.281	27.7402	12.2941	12.3893	11.3098	16.585	16.7406	15.2849	11.1525	9.57807	10.3163	C9orf40	chromosome 9 open reading frame 40
ENSG00000157653	1.34352	1.42267	1.63793	1.5648	1.49361	1.95895	1.99503	1.30945	0.994132	1.17509	1.63271	0.925553	0.961118	1.58913	1.51542	1.15183	1.19558	1.40879	C9orf43	chromosome 9 open reading frame 43
ENSG00000165118	6.77969	7.07348	7.66858	7.06697	6.82835	6.59845	9.03698	9.41239	9.6127	10.0902	9.27415	9.19182	3.25207	3.31944	3.41506	3.93946	4.1382	4.32153	C9orf64	chromosome 9 open reading frame 64
ENSG00000147894	3.58884	4.25308	4.19918	3.98556	4.28071	3.94485	3.92365	3.92044	1.92273	4.26351	4.4492	3.3041	2.50538	2.16056	2.90314	4.5121	4.37737	4.53543	C9orf72	C9orf72-SMCR8 complex subunit
ENSG00000136819	98.9306	110.569	109.276	115.226	113.779	109.501	117.819	109.642	101.423	126.195	113.261	117.041	106.945	98.5484	106.243	112.963	102.527	106.536	C9orf78	chromosome 9 open reading frame 78
ENSG00000155621	6.12087	8.2327	8.28726	7.9265	7.21607	7.17885	7.51727	7.08165	7.64494	8.24397	7.98215	8.49502	6.23365	6.22094	5.48339	8.64366	7.66621	9.70617	C9orf85	chromosome 9 open reading frame 85
ENSG00000063180	12.632	12.881	13.8043	6.96446	4.73969	6.5635	8.63398	11.4505	8.8962	4.09713	4.80375	5.54817	9.14154	9.91912	8.71158	7.13913	5.67294	8.95136	CA11	carbonic anhydrase 11
ENSG00000074410	242.491	268.333	292.52	109.538	108.805	114.626	224.362	229.358	205.409	89.6959	83.6939	64.6271	154.889	197.3	219.919	76.9351	77.9667	73.7527	CA12	carbonic anhydrase 12
ENSG00000185015	1.5657	1.68775	1.58397	2.19896	2.02322	2.11408	2.04439	1.82079	1.82325	3.51274	3.27166	3.02837	0.921162	0.940039	0.999258	2.44103	2.36855	2.2211	CA13	carbonic anhydrase 13
ENSG00000118298	0.59494	0.610666	0.48993	0.293201	0.107838	0.151157	0.314083	0.641967	0.298732	0.239919	0.256159	0.362856	0.242209	0.138709	0.290079	0.176429	0.097903	0.108684	CA14	carbonic anhydrase 14
ENSG00000169239	4.55393	5.30462	6.27895	6.34931	4.66135	5.65847	6.38083	4.70603	4.6221	6.33777	7.75772	5.42619	4.12417	5.41009	5.84115	7.1155	6.49417	6.54566	CA5B	carbonic anhydrase 5B
ENSG00000186312	14.3073	18.035	18.1052	17.5715	17.271	19.4482	16.6439	17.2498	17.9625	18.7089	18.9702	17.3525	13.1767	17.0398	18.9625	16.5413	18.4389	18.53	CA5BP1	carbonic anhydrase 5B pseudogene 1
ENSG00000178538	16.8536	17.1939	19.0971	5.72437	6.25347	5.38144	16.402	16.6693	17.9799	7.09018	6.18124	7.20497	6.63458	6.61851	7.5478	4.47813	4.21698	5.06937	CA8	carbonic anhydrase 8
ENSG00000120159	15.196	17.6427	18.3062	19.3619	18.1238	17.6829	17.5965	19.0948	13.4303	19.171	18.5571	18.8817	16.0828	15.1954	15.2111	20.9965	16.7513	18.8728	CAAP1	caspase activity and apoptosis inhibitor 1
ENSG00000135932	13.655	16.1661	16.4435	46.6264	40.3653	40.9539	16.1483	16.4212	13.7364	48.9585	48.2781	44.6045	19.0586	19.7378	19.3287	52.3891	52.8629	52.5178	CAB39	calcium binding protein 39
ENSG00000102547	22.1967	24.8817	25.1591	35.0105	38.4583	36.0423	24.8971	23.8805	21.0667	35.5092	33.6561	31.441	24.1713	26.8809	27.512	37.1225	39.8907	38.6716	CAB39L	calcium binding protein 39 like
ENSG00000183346	0.252865	0.457126	0.620129	1.74197	0.931338	1.18265	0.488902	0.261727	0.462547	0.692689	1.20025	1.52352	0.22281	0.451932	0.518173	0.716389	0.522468	0.725575	CABCOCO1	ciliary associated calcium binding coiled-coil 1
ENSG00000099991	15.1457	13.2225	12.9022	12.9238	14.0544	15.6097	14.4136	14.674	13.5287	13.2056	13.5699	12.3956	11.9048	12.9778	13.3974	13.5993	16.7607	13.7797	CABIN1	calcineurin binding protein 1
ENSG00000134508	22.3235	22.4848	22.9356	34.7031	34.4168	37.3579	17.9113	23.1072	22.6871	33.6472	32.2028	28.0751	15.4139	18.1757	21.3262	30.2026	31.3464	32.1582	CABLES1	Cdk5 and Abl enzyme substrate 1
ENSG00000149679	9.50543	8.36111	10.754	9.08261	10.3256	9.63081	8.83049	7.47509	10.178	9.31507	9.13483	8.5651	7.96566	8.99166	9.42118	9.52372	9.03814	8.89519	CABLES2	Cdk5 and Abl enzyme substrate 2
ENSG00000154040	12.4413	12.0259	12.4702	9.55082	9.37364	10.1493	9.85715	9.71474	8.01642	7.96616	9.49187	7.66413	11.2316	11.3779	13.0507	11.0099	12.1435	9.68914	CABYR	calcium binding tyrosine phosphorylation regulated
ENSG00000160325	30.2658	29.1905	29.0508	47.3029	51.2464	47.5315	23.4593	24.8095	29.9585	40.9732	40.7549	44.6996	34.3124	31.5976	30.7647	42.9756	52.3347	50.2062	CACFD1	calcium channel flower domain containing 1
ENSG00000158966	0.920832	0.941505	0.99217	0.885879	0.744452	0.992631	0.967746	1.08697	0.874249	1.09825	1.01388	0.788727	0.67638	0.711505	0.783073	1.03143	0.96164	0.922006	CACHD1	cache domain containing 1
ENSG00000141837	0.13976	0.24683	0.096058	0.150771	0.241913	0.083759	0.084797	0.117664	0.248362	0.240558	0.256309	0.438815	0.053068	0.132861	0.232473	0.245296	0.287448	0.444566	CACNA1A	calcium voltage-gated channel subunit alpha1 A
ENSG00000148408	0.237011	0.202975	0.214954	0.084429	0.136526	0.213309	0.313875	0.229552	0.284928	0.131646	0.157523	0.181651	0.158763	0.210538	0.211327	0.072772	0.141504	0.065488	CACNA1B	calcium voltage-gated channel subunit alpha1 B
ENSG00000151067	0	0.005524	0.042032	0.225357	0.865188	0.621688	0.009324	0.011632	0.071434	0.488757	1.41881	0.779084	0.181394	0.01943	0.178177	1.16331	2.16774	1.68497	CACNA1C	calcium voltage-gated channel subunit alpha1 C
ENSG00000157388	5.89226	6.01501	6.54922	10.2905	9.1199	9.43769	7.42789	6.86444	5.48162	10.5594	12.3234	9.41107	5.46708	6.35412	7.44476	11.8144	12.4311	10.5339	CACNA1D	calcium voltage-gated channel subunit alpha1 D
ENSG00000102001	0.349903	0.307827	0.192243	0.450789	0.629079	0.411094	0.243879	0.305656	0.196181	0.274082	0.385241	0.429606	0.078876	0.087006	0.070712	0.211491	0.236977	0.234401	CACNA1F	calcium voltage-gated channel subunit alpha1 F
ENSG00000196557	10.5118	10.0765	10.1456	7.83251	8.12749	9.53743	15.7459	16.1396	18.3199	10.9652	12.5347	10.9416	10.0257	11.3492	11.7552	7.68561	7.87624	8.19157	CACNA1H	calcium voltage-gated channel subunit alpha1 H
ENSG00000100346	0.758741	1.73924	0.822383	0.389547	0.468912	0.383817	1.59746	0.769822	0.851466	0.361373	0.411758	0.360497	0.590213	0.607616	0.684226	0.359179	0.340918	0.370263	CACNA1I	calcium voltage-gated channel subunit alpha1 I
ENSG00000153956	1.63001	1.29452	1.1722	0.867858	0.753339	0.723558	6.26804	7.98887	4.74604	7.93548	8.03938	5.57023	4.28028	4.18368	4.56324	7.5769	8.38768	7.88748	CACNA2D1	calcium voltage-gated channel auxiliary subunit alpha2delta 1
ENSG00000007402	2.53081	2.30742	2.80407	0.80644	0.865373	0.625277	1.39702	1.5557	1.54814	0.630371	0.497798	0.319913	1.6398	1.58102	1.96096	0.629488	0.498842	0.464237	CACNA2D2	calcium voltage-gated channel auxiliary subunit alpha2delta 2
ENSG00000067191	6.29204	4.95128	4.13844	1.9381	2.99274	1.94715	5.44402	5.18914	6.30141	2.24952	2.95279	2.80389	3.52226	2.78999	3.50913	2.94811	3.09759	2.95212	CACNB1	calcium voltage-gated channel auxiliary subunit beta 1
ENSG00000165995	0.236331	0.218016	0.136323	0.156526	0.144954	0.094167	0.100782	0.115682	0.055865	0.011422	0.145785	0.1513	0.06205	0.114839	0.158583	0.111509	0.14792	0.270056	CACNB2	calcium voltage-gated channel auxiliary subunit beta 2
ENSG00000167535	35.603	35.7581	35.4396	32.0112	31.2528	36.496	38.3796	34.5143	40.0733	40.3783	42.1721	37.4724	32.2168	37.3183	36.73	36.6921	36.6336	36.524	CACNB3	calcium voltage-gated channel auxiliary subunit beta 3
ENSG00000182389	2.632	2.29792	3.15186	2.08609	2.78232	2.71546	2.24378	3.0148	2.47354	2.52242	2.73906	1.67014	1.39318	2.00118	2.92757	3.0835	4.70045	2.41529	CACNB4	calcium voltage-gated channel auxiliary subunit beta 4
ENSG00000108878	0.56243	0.467344	0.395112	0.697081	0.403987	0.589358	0.444972	0.348415	0.316632	0.43677	0.448302	0.55258	0.684615	0.550259	0.439814	0.716927	0.520465	0.246668	CACNG1	calcium voltage-gated channel auxiliary subunit gamma 1
ENSG00000075461	74.1057	72.6287	81.782	187.685	192.879	191.94	74.5266	74.5477	82.8901	173.555	177.093	161.777	87.6709	104.852	100.881	173.727	191.259	170.771	CACNG4	calcium voltage-gated channel auxiliary subunit gamma 4
ENSG00000130433	0.289887	0.26452	0.124812	0.641106	0.531732	0.594491	0.262272	0.176139	0.125445	0.331424	0.626807	0.753389	0.157926	0.188072	0.21637	0.286928	0.334383	0.23224	CACNG6	calcium voltage-gated channel auxiliary subunit gamma 6
ENSG00000105298	10.4338	9.60398	10.5715	10.1771	11.0496	11.6238	9.0556	9.43661	11.2714	9.20064	9.25977	9.89391	9.15232	9.24844	8.76182	9.3851	10.6396	10.2924	CACTIN	cactin, spliceosome C complex subunit
ENSG00000226800	0.369432	0.348623	0.436629	0.483205	0.664723	0.503138	0.338887	0.423011	0.459101	0.393173	0.63558	0.446937	0.430049	0.489902	0.283269	0.547719	0.810483	0.428627	CACTIN-AS1	CACTIN antisense RNA 1
ENSG00000151893	13.2597	14.8506	16.4805	18.0955	16.3444	18.8369	14.9962	14.3939	11.4734	18.6862	17.3757	14.8661	10.4921	11.2929	12.9764	17.5251	17.1657	16.6669	CACUL1	CDK2 associated cullin domain 1
ENSG00000116161	197.635	249.791	242.089	152.415	141.183	141.978	234.195	240.524	149.569	150.921	138.853	149.159	201.399	207.63	200.676	149.908	129.531	138.715	CACYBP	calcyclin binding protein
ENSG00000084774	19.2031	16.8091	18.2607	12.5371	13.3401	13.3794	20.6349	19.0338	19.4666	14.6415	13.7466	12.8822	13.2829	15.1726	16.412	12.8097	14.3966	12.4182	CAD	carbamoyl-phosphate synthetase 2, aspartate transcarbamylase, and dihydroorotase
ENSG00000182985	44.778	50.249	50.1072	98.0217	107.843	100.744	40.025	36.2015	39.0998	77.0793	69.2867	59.9936	30.8367	33.3371	36.0699	74.3651	70.9943	73.3171	CADM1	cell adhesion molecule 1
ENSG00000105767	14.5309	12.811	13.1654	11.3127	12.2267	12.7861	12.7509	13.9157	18.3413	13.6593	14.3179	15.0587	15.4385	14.9288	14.4931	11.3338	13.3973	13.734	CADM4	cell adhesion molecule 4
ENSG00000081803	5.99731	7.4364	6.62115	10.4464	10.1246	9.37479	6.69656	6.52155	4.79581	9.61558	8.5091	8.43806	5.29419	6.68955	6.51285	9.21872	9.0851	9.38632	CADPS2	calcium dependent secretion activator 2
ENSG00000270419	0.045085	0.171934	0.053488	0.733126	0.523192	0.709119	0.105458	0.091001	0.235809	0.193631	0.380314	0.243721	0.147911	0.081356	0.136347	0.207836	0.575629	0.277681	CAHM	colon adenocarcinoma hypermethylated
ENSG00000012822	32.7517	30.9658	33.1918	96.048	96.013	95.1209	33.4723	30.8181	37.1727	88.2374	92.0492	76.8084	32.6134	35.1617	35.6046	86.9858	91.2775	95.9109	CALCOCO1	calcium binding and coiled-coil domain 1
ENSG00000136436	146.78	145.122	155.077	207.302	210.941	209.335	148.956	146.196	119.553	199.878	199.676	195.459	140.78	161.822	180.93	208.064	229.347	202.784	CALCOCO2	calcium binding and coiled-coil domain 2
ENSG00000004948	0.158288	0.173183	0.272731	0.19506	0.137992	0.206472	0.095592	0.164329	0.112338	0.210849	0.328861	0.251764	0.13701	0.125717	0.198811	0.167462	0.253668	0.321129	CALCR	calcitonin receptor
ENSG00000122786	5.13103	5.17035	6.81199	9.35111	9.08699	9.11271	7.45223	6.58121	6.38905	13.0355	13.3156	11.9102	10.1006	11.8713	11.3036	15.8242	17.4322	17.472	CALD1	caldesmon 1
ENSG00000198668	512.822	570.108	607.799	509.725	492.438	508.998	529.769	524.614	421.553	493.492	481.011	467.616	481.158	514.795	501.301	510.624	510.353	487.117	CALM1	calmodulin 1
ENSG00000143933	532.337	693.772	655.664	511.681	472.138	507.855	533.033	536.221	327.287	403.359	418.254	412.905	547.39	501.394	492.707	462.352	442.189	455.405	CALM2	calmodulin 2
ENSG00000160014	256.27	293.382	264.312	199.657	209.925	216.683	261.685	255.038	280.305	216.076	217.728	195.683	232.029	246.848	259.725	196.848	200.124	212.675	CALM3	calmodulin 3
ENSG00000129007	3.04687	2.66234	2.27842	1.40376	1.2624	0.973934	2.6898	2.44936	1.95507	1.32436	1.77006	2.08953	1.8643	2.07179	2.73485	1.46036	1.85655	1.58983	CALML4	calmodulin like 4
ENSG00000169885	0.161038	0.042469	0.020527	0.108571	0.26526	0.273282	0.13949	0.129536	0.187894	0.122881	0.10127	0	0.112531	0	0.115512	0.12147	0.053795	0.083695	CALML6	calmodulin like 6
ENSG00000179218	962.376	961.474	1006.88	1069.98	1172.67	1149.92	917.543	913.003	1017.18	1021.92	1034.78	1073.05	1012.48	1033.23	998.353	1053.31	1003.5	1081.26	CALR	calreticulin
ENSG00000128595	102.335	121.017	127.002	121.225	119.188	122.908	108.869	109.384	92.6335	122.568	120.618	109.408	94.2005	104.698	112.378	133.499	127.416	121.325	CALU	calumenin
ENSG00000134072	3.25529	2.79461	3.16817	2.14309	2.06864	2.29575	3.76141	4.11183	4.4838	2.85866	3.43907	3.21517	2.95685	2.25544	2.68846	1.07981	1.62758	3.73365	CAMK1	calcium/calmodulin dependent protein kinase I
ENSG00000183049	6.40945	4.44112	5.54098	10.6048	10.9334	11.8404	5.32113	5.79224	5.94078	11.9848	11.6246	10.6145	4.0314	3.9752	4.30634	11.1345	11.2319	9.67975	CAMK1D	calcium/calmodulin dependent protein kinase ID
ENSG00000058404	2.4277	1.93165	1.55366	1.45989	2.067	1.65813	1.33001	1.26155	1.6155	0.89562	0.970821	0.762342	0.596628	0.44251	0.874193	0.564152	0.648838	0.685441	CAMK2B	calcium/calmodulin dependent protein kinase II beta
ENSG00000145349	0.247448	0.429215	0.317425	0.849978	0.505558	0.433665	0.240304	0.216875	0.061214	0.491213	0.136108	0.281759	0.315634	0.3099	0.572378	0.845329	1.42882	1.74684	CAMK2D	calcium/calmodulin dependent protein kinase II delta
ENSG00000148660	26.7328	28.4475	27.7235	26.6149	30.702	31.5894	28.87	27.4665	27.0289	30.1524	31.1763	25.0519	18.0226	19.6946	20.6404	31.1284	34.5097	30.7977	CAMK2G	calcium/calmodulin dependent protein kinase II gamma
ENSG00000162545	28.7284	28.3871	30.1563	75.1272	70.5586	69.6721	28.5527	28.2288	25.5575	62.216	59.2012	61.4146	31.9571	31.8461	32.0143	70.5064	67.2278	66.3707	CAMK2N1	calcium/calmodulin dependent protein kinase II inhibitor 1
ENSG00000163888	33.3662	28.9084	34.2745	35.4089	35.4544	37.4449	32.44	32.5701	38.3488	33.1502	35.9619	38.7515	33.0028	33.1133	30.8287	31.8904	30.4332	30.7587	CAMK2N2	calcium/calmodulin dependent protein kinase II inhibitor 2
ENSG00000004660	3.96758	3.78131	4.09274	6.00304	6.62305	6.62571	3.89712	3.68553	3.66378	5.598	5.3913	5.33628	5.00478	4.46359	4.37732	7.27499	7.36493	7.53247	CAMKK1	calcium/calmodulin dependent protein kinase kinase 1
ENSG00000110931	29.1794	27.8595	29.4222	30.0541	31.6269	32.6776	29.5391	29.6729	31.2318	31.9387	31.5977	29.3319	25.423	27.4338	29.9433	31.4718	34.6243	31.3942	CAMKK2	calcium/calmodulin dependent protein kinase kinase 2
ENSG00000143919	8.43116	8.79844	9.12274	9.69113	6.59044	7.8769	8.77009	8.60411	7.53493	9.24495	9.3667	8.56499	9.40965	8.68147	8.96416	9.54668	7.27078	9.77696	CAMKMT	calmodulin-lysine N-methyltransferase
ENSG00000164615	42.6358	54.5	58.5154	61.3118	56.425	55.1144	51.6928	50.8682	37.7837	59.6064	55.8411	58.2024	55.4177	55.5766	47.2799	65.9172	57.1604	53.3956	CAMLG	calcium modulating ligand
ENSG00000130559	12.3591	12.6083	15.2552	11.4561	12.0582	12.7002	12.2428	12.7764	13.5057	12.2491	13.0916	11.2688	9.94071	11.7815	12.4471	12.8131	12.641	12.0795	CAMSAP1	calmodulin regulated spectrin associated protein 1
ENSG00000118200	19.9679	21.8305	23.8928	26.3503	24.5924	25.5146	23.1742	22.1972	16.3467	31.7897	29.2089	23.5421	17.0768	21.1295	23.8777	30.9124	30.9108	30.3724	CAMSAP2	calmodulin regulated spectrin associated protein family member 2
ENSG00000076826	21.5257	18.8338	20.504	36.2169	36.7558	36.8273	20.2554	19.5001	23.6792	28.4162	30.3092	28.1324	20.5802	19.5354	20.1808	32.6856	34.5052	32.7269	CAMSAP3	calmodulin regulated spectrin associated protein family member 3
ENSG00000171735	50.0045	49.179	52.2658	55.8993	50.6921	54.1431	47.1974	50.8225	55.5344	48.0395	50.2755	53.6472	49.494	47.0606	51.4479	51.0871	55.6347	56.6697	CAMTA1	calmodulin binding transcription activator 1
ENSG00000108509	14.1958	12.4241	14.8735	18.6891	18.2149	20.7328	14.0377	14.4802	16.0586	18.5242	16.9362	14.8432	11.8077	13.5976	15.0069	17.6493	19.3271	19.7229	CAMTA2	calmodulin binding transcription activator 2
ENSG00000111530	126.345	167.994	176.834	128.025	118.617	124.822	156.362	168.881	134.865	136.258	131.025	116.248	122.078	147.091	159.297	122.943	131.471	128.181	CAND1	cullin associated and neddylation dissociated 1
ENSG00000144712	3.17514	2.92902	2.73843	1.25823	1.39148	1.27874	4.07671	4.17226	4.23516	1.90388	2.03022	1.6836	1.51634	1.63341	1.62349	0.806362	1.14202	0.77554	CAND2	cullin associated and neddylation dissociated 2 (putative)
ENSG00000171302	330.78	332.526	366.901	506.103	556.451	549.234	299.19	321.039	365.693	463.851	444.06	437.665	335.355	383.652	386.491	459.5	498.783	484.406	CANT1	calcium activated nucleotidase 1
ENSG00000127022	419.636	485.002	509.753	504.188	488.772	531.75	466.014	458.011	354.11	571.314	557.276	439.604	375.464	436.963	496.527	533.439	533.49	522.253	CANX	calnexin
ENSG00000131236	161.066	177.401	182.85	178.678	175.339	182.815	187.184	187.323	162.649	190.501	183.619	151.588	144.071	163.648	162.81	177.12	187.776	179.888	CAP1	cyclase associated actin cytoskeleton regulatory protein 1
ENSG00000112186	60.2229	62.8185	68.2289	54.5343	52.3025	54.6903	61.9639	61.8899	52.679	49.7916	51.6224	46.9487	56.94	61.9832	62.3169	56.8877	61.7291	55.9329	CAP2	cyclase associated actin cytoskeleton regulatory protein 2
ENSG00000042493	101.922	94.3956	101.999	122.203	130.872	129.4	105.361	111.523	136.697	126.457	135.352	152.22	135.975	132.433	120.455	132.63	150.547	136.971	CAPG	capping actin protein, gelsolin like
ENSG00000014216	140.125	128.14	133.248	145.09	161.622	166.728	122.855	125.001	148.072	157.808	163.101	157.632	118.165	129.548	127.853	144.675	167.657	142.662	CAPN1	calpain 1
ENSG00000142330	7.50995	4.85532	7.18609	8.14467	8.5622	10.2323	5.90615	6.31056	5.80431	7.34709	8.53461	7.4703	4.5023	4.53659	4.56542	8.15599	8.80724	8.56468	CAPN10	calpain 10
ENSG00000260942	0.482632	0.480843	0.471526	0.54464	0.453709	0.492307	0.722917	0.667792	0.526855	0.476598	0.526532	0.426363	0.376785	0.406431	0.544342	0.494433	0.575411	0.523443	CAPN10-DT	CAPN10 divergent transcript
ENSG00000182472	0.116487	0.103086	0.157097	0.183428	0.148044	0.042322	0.086508	0.178348	0.109622	0.093847	0.129889	0.044358	0.101828	0	0.197469	0.111245	0.103037	0.198605	CAPN12	calpain 12
ENSG00000162949	7.88106	7.08072	7.27181	12.168	15.4524	11.2927	7.75763	7.68366	7.13101	12.5688	13.0097	10.3929	6.04375	5.38566	10.0679	14.8516	15.6938	15.3842	CAPN13	calpain 13
ENSG00000214711	0.05879	0.076769	0.11344	0.626328	0.618219	0.803193	0.102185	0.130274	0.078596	1.29321	1.6452	1.1462	0.05785	0.047955	0.07983	1.05869	1.2284	1.01475	CAPN14	calpain 14
ENSG00000103326	22.2564	17.9757	21.761	14.1997	13.7284	13.6426	20.6421	20.9081	22.5902	15.4055	14.6556	14.8111	16.3938	16.5916	17.2405	14.8499	15.3656	14.0283	CAPN15	calpain 15
ENSG00000162909	88.7767	86.5097	91.1998	237.53	233.044	224.933	80.6047	81.9142	85.0205	198.24	189.684	191.193	102.968	107.82	105.649	212.964	206.662	217.844	CAPN2	calpain 2
ENSG00000092529	0.13745	0.079085	0	0.913628	0.370693	0.507781	0.243849	0.071585	0.277724	0.554511	0.195955	0.348988	0	0	0	0.70184	0.074905	0.130468	CAPN3	calpain 3
ENSG00000149260	5.7235	5.13955	5.55055	5.0125	5.78554	6.09486	5.93357	6.29187	7.19588	6.00045	6.79354	5.74348	7.37186	8.08245	8.61805	6.39623	6.43925	6.15348	CAPN5	calpain 5
ENSG00000077274	0.048721	0.010081	0.039945	0.117381	0.051291	0.078301	0.027131	0.01623	0.017849	0.166041	0.176188	0.178139	0.043772	0.06519	0.065231	0.266925	0.313819	0.914935	CAPN6	calpain 6
ENSG00000131375	28.8039	34.0671	36.592	39.8042	38.2117	38.258	34.1782	34.8769	27.2451	35.2188	35.4775	35.4344	31.4412	34.2393	34.9482	39.4671	41.8739	38.1433	CAPN7	calpain 7
ENSG00000203697	1.2987	1.2857	1.0294	11.2318	11.2073	9.3229	1.2971	1.27546	1.10787	7.94709	7.89644	7.80865	0.365538	0.599978	0.908326	9.35041	8.01713	7.69717	CAPN8	calpain 8
ENSG00000135773	1.56172	1.66009	1.42444	2.94683	3.30967	2.9878	1.22661	1.28455	1.56306	2.61477	2.44287	2.46115	1.30344	1.20776	1.25282	2.88498	2.91489	2.78116	CAPN9	calpain 9
ENSG00000126247	557.858	491.143	563.213	619.791	657.869	664.146	461.325	497.497	552.961	604.855	622.613	628.119	533.645	530.379	546.979	523.771	650.226	590.907	CAPNS1	calpain small subunit 1
ENSG00000135387	215.583	258.929	259.254	243.773	232.893	245.769	283.265	268.496	201.155	249.844	252.779	212.49	195.713	234.963	259.311	259.277	252.855	237.353	CAPRIN1	cell cycle associated protein 1
ENSG00000110888	7.2498	6.86613	6.35658	8.06981	9.65559	9.65427	6.93559	5.936	4.6502	8.82972	7.83937	8.22479	4.6975	3.8574	4.76499	9.96733	7.20929	8.03603	CAPRIN2	caprin family member 2
ENSG00000105519	4.55162	3.01963	2.39856	7.60504	7.63793	7.57761	3.00259	2.68524	3.71911	4.80697	5.80544	5.88127	2.19905	1.89716	2.92216	5.90273	4.31148	5.2217	CAPS	calcyphosine
ENSG00000180881	2.64949	2.24268	3.52533	5.47044	4.96055	5.27719	3.74117	3.3956	2.77223	6.04972	6.4517	5.73268	2.08579	2.75295	2.45625	6.58774	6.72144	6.96728	CAPS2	calcyphosine 2
ENSG00000152611	11.2802	13.0132	12.1714	16.4403	16.5098	18.4413	11.0381	10.6421	9.79769	13.4303	16.6563	15.6392	12.8364	10.273	11.9912	9.29857	7.87944	7.63646	CAPSL	calcyphosine like
ENSG00000116489	105.219	128.539	129.64	119.34	110.477	115.003	123.523	118.863	95.2348	115.067	120.107	105.211	101.769	100.848	105.832	117.803	122.131	116.819	CAPZA1	capping actin protein of muscle Z-line subunit alpha 1
ENSG00000198898	88.3236	93.5649	92.1444	122.59	120.335	122.183	91.0001	83.1562	68.6693	120.064	110.304	121.103	86.0453	84.8833	87.5672	116.004	122.374	121.282	CAPZA2	capping actin protein of muscle Z-line subunit alpha 2
ENSG00000077549	193.078	206.152	209.882	175.27	182.303	178.384	188.017	196.168	189.764	169.815	175.945	176.259	208.473	219.758	221.751	173.717	185.255	178.236	CAPZB	capping actin protein of muscle Z-line subunit beta
ENSG00000100065	9.13784	8.06577	9.48573	5.06574	5.49527	6.08814	6.70363	7.09903	7.72034	4.13167	4.65907	4.24085	6.11392	6.24522	6.08782	4.86543	4.69631	6.26324	CARD10	caspase recruitment domain family member 10
ENSG00000141527	20.7395	16.2431	18.5174	19.5163	19.5238	20.196	20.9469	20.4084	22.1211	18.6577	21.0542	16.911	14.7085	16.6467	19.012	18.462	20.0599	19.4884	CARD14	caspase recruitment domain family member 14
ENSG00000204397	1.89596	1.60584	2.28108	7.82228	5.3907	6.05081	2.77992	2.07478	1.79004	12.0967	9.87949	9.24491	4.08101	3.48817	2.20061	11.7279	8.98319	12.4402	CARD16	caspase recruitment domain family member 16
ENSG00000255501	1.5278	0.989768	1.21805	1.02479	1.22757	0.818099	1.66655	1.87658	2.20698	1.37283	1.83266	1.67127	1.59331	1.46313	1.88267	1.64284	1.88853	1.92943	CARD18	caspase recruitment domain family member 18
ENSG00000165233	39.8829	36.1714	40.4086	30.4738	33.8982	31.3737	33.8819	36.224	48.2019	28.7605	30.3232	34.902	28.5283	28.7822	29.4105	28.5688	31.382	28.4924	CARD19	caspase recruitment domain family member 19
ENSG00000132357	0.137581	0.079267	0.166405	0.556898	0.530224	0.697417	0.174359	0.247879	0.188704	0.977081	0.961522	0.691549	0.184672	0.218675	0.21183	1.09425	1.27116	1.04539	CARD6	caspase recruitment domain family member 6
ENSG00000105483	10.8009	10.5415	10.6969	14.7302	14.2016	14.5343	13.429	10.7263	9.58413	14.7419	13.8962	13.3197	9.06486	9.9267	8.65706	15.8164	17.9218	15.018	CARD8	caspase recruitment domain family member 8
ENSG00000268001	0.378179	0.415074	0.36657	1.14811	1.03753	1.04421	0.632975	0.558245	0.400438	1.25459	1.49233	1.21452	0.463569	0.422995	0.494577	1.54456	1.96952	1.48442	CARD8-AS1	CARD8 antisense RNA 1
ENSG00000187796	3.65754	3.00183	3.29513	6.69637	7.95696	7.17923	3.32168	3.04388	2.77785	5.94437	6.25503	6.43961	2.48567	1.8009	1.8175	6.07207	4.95387	5.52606	CARD9	caspase recruitment domain family member 9
ENSG00000138380	2.15248	2.24516	2.04883	3.79429	2.86582	3.64533	1.74418	2.25904	1.44252	3.98263	4.21987	2.9077	0.937133	1.41261	2.11091	3.51106	4.30648	4.54939	CARF	calcium responsive transcription factor
ENSG00000153048	109.19	109.544	115.156	93.5947	95.466	100.761	95.2463	100.078	118.244	97.7459	94.2582	99.951	113.336	104.695	106.387	81.8845	88.2926	93.177	CARHSP1	calcium regulated heat stable protein 1
ENSG00000142453	28.2074	24.0947	27.2649	23.5723	24.3895	24.8006	27.0011	26.6182	31.7329	23.3685	24.5849	23.0767	19.5284	21.5107	23.7225	20.5772	21.757	22.9749	CARM1	coactivator associated arginine methyltransferase 1
ENSG00000079691	6.60215	7.52079	7.93197	10.5296	11.9491	11.3155	6.44977	6.70623	6.09393	10.8762	11.6006	12.1901	6.4333	6.59164	7.3709	12.6151	11.4726	12.5728	CARMIL1	capping protein regulator and myosin 1 linker 1
ENSG00000159753	5.58826	4.28719	5.95129	1.30112	0.83881	1.50964	5.49355	6.46755	6.47747	1.03868	2.08592	1.38485	5.14697	5.46536	6.37711	1.11096	0.543692	1.75673	CARMIL2	capping protein regulator and myosin 1 linker 2
ENSG00000156017	18.2935	20.4976	22.0521	11.6676	11.0838	11.284	18.573	19.7615	17.292	11.9918	10.8429	10.9354	14.107	15.5244	17.0079	11.1128	10.9563	11.729	CARNMT1	carnosine N-methyltransferase 1
ENSG00000110619	27.4634	25.5164	29.317	25.1182	25.7806	28.5454	30.2298	30.5786	29.7984	27.8831	30.5778	29.7884	25.7329	26.9149	28.5131	25.6316	27.55	26.6667	CARS1	cysteinyl-tRNA synthetase 1
ENSG00000134905	23.6527	24.19	24.5136	26.0305	25.7038	25.8045	21.4067	22.4285	21.6142	24.5043	24.2822	22.3013	21.5417	19.4442	20.5967	22.7999	21.0339	23.5423	CARS2	cysteinyl-tRNA synthetase 2, mitochondrial
ENSG00000118307	3.28213	4.48095	3.31581	5.54545	5.27083	6.26746	2.61824	1.99879	1.15061	4.43999	5.58071	5.76028	2.1514	1.98769	1.99445	3.28267	2.42911	2.6479	CASC1	cancer susceptibility 1
ENSG00000249375	0.273162	0.182754	0.292439	0.122138	0.219378	0.125962	0.098851	0.059396	0.135094	0.054112	0.089125	0.120755	0.14387	0.263096	0.256867	0.104551	0.119166	0.18232	CASC11	cancer susceptibility 11
ENSG00000177640	0.990947	1.21812	1.63696	1.85724	1.77349	1.70103	1.20831	0.945874	1.01435	1.81608	1.52875	1.27328	0.90724	0.995451	1.24051	1.59029	1.9598	1.61559	CASC2	cancer susceptibility 2
ENSG00000229876	0	0.348001	0.269491	0.064795	0.313383	0.423563	0.264407	0.121611	0.151618	0.083881	0.070381	0.150546	0.314607	0.174941	0.339238	0.241777	0.571518	0.420765	CASC20	cancer susceptibility 20
ENSG00000108349	60.3782	57.8337	65.7622	61.6501	64.1724	65.0753	63.6536	63.5709	64.2901	62.7307	63.2272	57.4553	53.263	57.6874	61.3312	60.4504	63.0053	62.5103	CASC3	CASC3 exon junction complex subunit
ENSG00000166734	65.8491	68.8165	69.5461	82.4225	81.7229	79.5343	68.5439	66.5363	61.5766	85.1573	79.7416	75.0786	50.0379	56.7355	60.0517	86.464	83.5951	82.7293	CASC4	cancer susceptibility 4
ENSG00000249395	1.00404	0.984567	1.4093	1.7964	1.49708	1.43449	0.364415	0.434656	0.459439	0.472041	0.602359	0.309476	2.13731	1.94058	1.92393	2.90932	3.07321	3.27847	CASC9	cancer susceptibility 9
ENSG00000127995	4.94355	5.30553	5.86988	11.7495	11.0881	10.4278	5.83203	6.71174	4.08	11.2762	9.97779	9.91454	5.21744	4.09862	5.4982	10.4759	10.5226	11.2148	CASD1	CAS1 domain containing 1
ENSG00000147044	16.1435	19.0006	18.4915	20.0416	18.5856	19.2307	16.9169	17.0253	13.8524	20.2261	17.0967	17.2965	13.3612	16.5821	16.3242	18.899	19.4736	22.1235	CASK	calcium/calmodulin dependent serine protein kinase
ENSG00000167971	1.75179	1.78496	1.79286	1.05242	1.15493	1.25536	2.15881	1.16578	1.15718	1.9965	1.20451	1.11187	0.904531	1.04641	1.25054	1.51339	1.31448	1.10897	CASKIN1	CASK interacting protein 1
ENSG00000177303	12.5271	11.3658	13.2807	14.8899	16.7757	16.1366	11.931	12.9562	15.3049	15.4212	15.8761	14.5483	11.8138	13.6157	13.889	16.732	17.687	16.4228	CASKIN2	CASK interacting protein 2
ENSG00000137752	0.242666	0.208777	0.203542	1.82237	2.16975	1.62723	1.2644	0.425488	0.395741	3.48668	3.04742	3.29698	0.852351	0.717828	0.783189	2.1978	2.54303	2.91365	CASP1	caspase 1
ENSG00000003400	0.432577	0.244267	0.464662	0.211401	0.919117	1.08369	0.13317	0.464832	0.700613	0.689637	0.694949	0.439694	0.293509	0.766704	0.469572	0.804974	0.461912	0.246956	CASP10	caspase 10
ENSG00000106144	15.6963	17.31	18.6244	12.7833	12.6211	12.5485	16.3145	16.3099	15.6077	12.5624	12.445	10.6473	11.9098	13.5093	15.2066	10.6278	11.4532	11.6673	CASP2	caspase 2
ENSG00000164305	18.9256	21.3929	19.4964	20.0583	19.2808	20.7599	22.0625	19.5062	16.7179	19.8003	20.5525	19.8764	16.9581	18.1657	17.6669	21.5534	21.2849	20.5537	CASP3	caspase 3
ENSG00000196954	6.58441	7.25309	7.10058	19.5284	19.3624	19.3109	8.1337	8.50489	7.70243	22.783	21.8688	19.227	6.39404	6.84971	7.12395	21.35	25.4199	23.2941	CASP4	caspase 4
ENSG00000138794	23.4626	23.9749	23.136	25.2747	24.8557	22.7146	18.9065	19.8181	18.2313	25.8383	30.0351	24.6339	18.184	17.6419	21.2999	25.0302	25.5845	26.4592	CASP6	caspase 6
ENSG00000165806	28.9497	33.9695	34.0816	58.7379	55.874	56.9435	33.5621	35.256	33.6676	52.6085	50.9522	46.855	37.2068	38.6172	38.2484	61.0118	58.5734	57.3882	CASP7	caspase 7
ENSG00000064012	10.7249	11.5891	11.3869	19.5476	18.0979	18.0641	12.4072	10.6705	9.22352	20.9133	18.676	19.5724	11.1964	12.4907	12.0528	22.427	21.2278	19.2466	CASP8	caspase 8
ENSG00000118412	8.81093	9.28443	11.3172	8.97541	8.03515	7.7224	9.10213	9.13047	6.59645	8.97191	7.76213	6.76499	5.20556	7.25472	7.10383	8.82281	8.63487	8.85508	CASP8AP2	caspase 8 associated protein 2
ENSG00000132906	6.87519	8.32282	7.25745	15.5602	16.0722	14.2998	7.21974	7.3567	8.39634	14.6977	14.8224	13.9596	9.55362	7.70178	8.2346	15.9517	17.4728	13.8894	CASP9	caspase 9
ENSG00000118729	0.42005	0.502251	0.460658	0.654174	0.639744	0.862366	0.305643	0.252636	0.2292	0.751759	0.778966	0.73485	0.565236	0.579432	0.506781	0.680946	0.529523	0.545143	CASQ2	calsequestrin 2
ENSG00000153113	70.5786	78.691	85.495	129.733	123.404	124.167	81.4195	81.3569	63.8274	134.628	131.557	117.805	68.4994	79.9589	76.7249	127.177	126.055	129.876	CAST	calpastatin
ENSG00000239282	9.79442	7.49084	8.47171	5.66582	7.10009	6.08029	7.80183	7.57406	7.87659	6.43175	6.44738	6.72703	7.53811	6.7606	6.41879	5.01251	6.07742	7.12312	CASTOR1	cytosolic arginine sensor for mTORC1 subunit 1
ENSG00000274070	1.40616	1.57036	1.96577	1.00254	1.2177	1.19906	1.2012	1.25944	1.89877	1.0397	1.05919	1.19296	1.32162	1.19453	1.30039	1.31326	1.80915	1.51618	CASTOR2	cytosolic arginine sensor for mTORC1 subunit 2
ENSG00000239521	6.33228	5.32484	5.31177	6.01848	7.99119	7.58981	6.25843	6.73791	6.20869	4.86784	6.66594	4.55072	4.65587	3.16865	4.84533	5.73352	6.90218	7.13702	CASTOR3	CASTOR family member 3
ENSG00000130940	11.6286	10.204	12.2771	16.7194	14.9863	15.021	10.3453	11.0214	10.293	13.6857	13.8221	11.6448	10.2221	10.1103	11.4421	13.7674	12.409	13.1631	CASZ1	castor zinc finger 1
ENSG00000121691	103.506	109.96	111.186	154.184	152.434	146.04	98.2785	99.4523	94.5	133.283	125.639	121.307	101.919	106.887	100.447	137.622	141.816	143.492	CAT	catalase
ENSG00000158428	0.62281	0.711429	0.453858	0.629519	1.11814	1.10374	0.511254	0.618931	0.649125	0.648133	0.822498	1.04621	0.300081	0.17082	0.272678	0.482447	0.306423	0.313261	CATIP	ciliogenesis associated TTC17 interacting protein
ENSG00000225062	1.8547	1.22641	0.96121	1.94022	2.2578	1.26133	1.6922	0.948649	1.80131	2.01713	1.50574	1.77542	0.790699	0.643114	1.23742	0.951786	0.792086	1.77169	CATIP-AS1	CATIP antisense RNA 1
ENSG00000166762	5.05893	4.01569	2.53688	6.06994	6.05111	6.2318	4.04073	5.03035	5.25512	5.21312	6.36311	6.20089	2.68912	1.69905	2.23873	5.78835	9.30837	7.47485	CATSPER2	cation channel sperm associated 2
ENSG00000205771	5.57018	5.20192	4.73412	8.56129	5.80725	8.44696	5.27013	4.76035	4.39156	7.13129	8.57689	7.78562	6.33475	5.30766	5.02963	7.61013	7.86627	7.1219	CATSPER2P1	cation channel sperm associated 2 pseudogene 1
ENSG00000152705	0.281676	0.359122	0.4787	0.164802	0.375193	0.218882	0.289128	0.309006	0.349802	0.165243	0.456497	0.306536	0.426121	0.394277	0.294075	0.329248	0.185366	0.168069	CATSPER3	cation channel sperm associated 3
ENSG00000133962	0.584473	0.412229	0.929548	1.61481	1.35242	1.97069	0.414945	0.857522	0.297521	1.24898	1.26257	1.25859	0.253804	0.563341	0.457676	1.51024	2.22388	1.31267	CATSPERB	cation channel sperm associated auxiliary subunit beta
ENSG00000174898	0.900387	0.853252	1.05743	1.18942	0.94331	1.66348	0.785341	0.835208	0.740323	0.733568	0.737203	1.64321	0.230396	0	0.362442	0	0	0	CATSPERD	cation channel sperm associated auxiliary subunit delta
ENSG00000179397	0.307065	0.498812	0.171363	0.273122	0.899051	0.950723	0.395732	0.555469	0.104791	0.504463	0.387066	0.52939	0.277676	0.137011	0.215791	0.978902	0.607877	0.70563	CATSPERE	catsper channel auxiliary subunit epsilon
ENSG00000099338	3.3491	3.22758	2.70705	4.3496	4.215	3.4681	2.47551	3.84905	2.97194	3.81446	2.89418	4.69419	3.04419	1.73745	2.5504	3.18196	4.02682	3.78612	CATSPERG	cation channel sperm associated auxiliary subunit gamma
ENSG00000219435	9.0427	7.40882	9.25962	1.94274	2.32819	2.25713	7.978	7.95329	10.0865	2.94497	2.7508	2.28917	6.9475	5.23492	5.06498	2.3688	1.74138	1.84902	CATSPERZ	catsper channel auxiliary subunit zeta
ENSG00000105974	0.135151	0.176524	1.37404	0.174515	0.19297	0.088259	0.206648	0.06347	0.212191	0.128382	0.045234	0.490419	0.215623	0.063277	0.078123	0.314335	0.147003	11.475	CAV1	caveolin 1
ENSG00000177469	18.4117	17.5064	21.4488	23.001	23.813	23.9773	19.7788	19.4114	21.2584	26.5964	26.6791	26.6077	26.901	29.4484	28.4209	23.1474	23.8308	25.8262	CAVIN1	caveolae associated protein 1
ENSG00000168497	0.083356	0.045579	0.044808	0.271845	0.258709	0.191042	0.065398	0.011951	0.037528	0.522407	0.39156	0.464329	0.086849	0.056303	0.057615	0.342305	0.405724	1.0702	CAVIN2	caveolae associated protein 2
ENSG00000170681	0.05792	0.060538	0.060268	0.148206	0.16982	0.118568	0.032269	0.058279	0.033436	0.224025	0.186959	0.178801	0.041666	0.061316	0.051268	0.135183	0.220504	0.245253	CAVIN4	caveolae associated protein 4
ENSG00000099625	2.70978	2.56129	2.3379	0.874616	0.728691	0.67857	2.36797	2.41648	2.6312	0.65942	0.53771	0.597415	1.70899	1.51045	1.8188	1.26371	0.713683	0.789913	CBARP	CACN subunit beta associated regulatory protein
ENSG00000078699	9.49471	8.81181	8.86221	13.5925	13.0385	13.8351	8.67186	9.29247	8.07899	13.7895	12.8691	11.0929	6.59197	7.38701	8.98267	14.43	14.8464	16.0608	CBFA2T2	CBFA2/RUNX1 partner transcriptional co-repressor 2
ENSG00000129993	34.5779	31.8925	38.8957	57.3478	59.514	67.6917	39.0368	36.8079	43.9267	54.7932	53.9229	45.2204	27.2327	31.6861	35.105	38.3624	42.024	48.8471	CBFA2T3	CBFA2/RUNX1 partner transcriptional co-repressor 3
ENSG00000067955	24.254	25.4358	26.7046	13.7485	14.4729	13.1399	23.3738	22.229	23.8907	11.592	12.4457	12.121	15.2796	13.526	15.3788	12.4521	10.0076	12.6605	CBFB	core-binding factor subunit beta
ENSG00000110395	8.38096	9.14326	10.9154	6.67489	6.51534	7.16555	9.15836	8.88934	7.67145	8.16789	7.62114	5.79309	4.76213	6.47669	7.53427	7.79792	8.69241	7.53672	CBL	Cbl proto-oncogene
ENSG00000114423	3.64473	4.1832	4.66256	4.96219	4.96252	4.10464	3.97852	3.07101	3.26157	5.1855	5.13272	4.23064	4.21487	3.19771	4.6264	4.5084	4.81484	4.92022	CBLB	Cbl proto-oncogene B
ENSG00000142273	20.166	19.3172	21.6927	17.0763	16.3705	15.5927	19.7633	20.5487	21.0193	14.8541	15.7998	15.0032	20.644	21.0834	19.0036	15.2864	17.3169	16.5065	CBLC	Cbl proto-oncogene C
ENSG00000105879	12.2188	15.5009	14.1785	13.3791	12.6927	16.3916	14.0641	14.2976	16.448	13.3932	15.0169	13.1462	10.1815	12.2872	13.2934	14.1741	13.0373	14.2905	CBLL1	Cbl proto-oncogene like 1
ENSG00000141668	6.16556	7.48511	7.04252	8.7459	8.22517	8.64069	3.55916	3.14894	2.761	5.09342	5.48531	5.33471	0.130536	0.072664	0.071397	0.038651	0.158555	0.250731	CBLN2	cerebellin 2 precursor
ENSG00000139899	0.779525	0.614669	0.779485	0.777511	0.688366	0.727478	0.882287	0.836436	1.19766	0.734684	1.00506	0.847157	0.891028	0.9621	0.850701	0.620278	0.669348	0.808398	CBLN3	cerebellin 3 precursor
ENSG00000159228	122.41	129.778	122.359	108.669	115.055	111.651	126.793	128.221	141.466	115.043	109.695	117.218	114.885	113.71	102.223	123.343	128.901	130.747	CBR1	carbonyl reductase 1
ENSG00000159231	18.9181	18.1199	16.7954	11.1005	11.4337	11.5088	20.1329	18.6907	19.9652	20.4515	19.9086	20.864	17.8665	16.6911	15.0152	19.7859	18.768	18.5203	CBR3	carbonyl reductase 3
ENSG00000236830	10.0908	10.7537	10.8711	29.9838	31.0902	28.8009	12.7117	13.7682	11.7034	26.0773	28.4975	24.7861	12.0339	13.9981	12.1618	28.4166	30.1356	30.1328	CBR3-AS1	CBR3 antisense RNA 1
ENSG00000145439	16.0424	16.0261	15.7469	15.1679	16.6388	17.1075	15.7137	17.0544	16.6372	16.3357	15.6759	15.3021	13.5083	14.5564	14.6362	14.8647	13.0545	14.2372	CBR4	carbonyl reductase 4
ENSG00000160200	16.5045	14.2691	15.8483	7.50442	7.78712	8.10549	11.9681	11.9815	12.1135	6.79682	7.98307	7.20183	12.0347	12.5788	12.3686	8.40494	10.3363	8.89087	CBS	cystathionine beta-synthase
ENSG00000274276	0.320316	0	0.328362	0	0.305924	0.412096	0.216049	0.146804	0.146057	0.102124	0	0.101291	0.046565	0.210166	0	0.194454	0.366401	0.136389	CBSL	cystathionine beta-synthase like
ENSG00000172785	59.0881	53.1828	60.2127	57.5905	57.2499	58.7006	47.1185	46.1821	65.9693	42.4979	46.8018	52.3951	54.7729	54.3202	54.8652	57.2811	49.6247	48.7098	CBWD1	COBW domain containing 1
ENSG00000136682	49.9177	40.6899	43.353	33.1927	39.2165	30.2184	42.3689	42.2399	42.9402	38.9721	36.6748	43.1286	41.6619	43.2973	45.3574	31.7877	31.8152	35.3887	CBWD2	COBW domain containing 2
ENSG00000196873	15.7368	38.3366	35.2996	30.3805	18.0311	18.142	42.0111	28.3833	17.7791	31.7055	26.4899	19.4833	16.2411	16.5538	12.3927	18.8281	24.9201	23.7858	CBWD3	COBW domain containing 3
ENSG00000147996	245.727	161.614	152.898	136.955	185.077	156.967	146.272	142.564	266.679	105.833	117.937	143.805	104.68	109.524	121.252	113.232	113.823	126.124	CBWD5	COBW domain containing 5
ENSG00000215126	2.70539	3.1416	3.15584	4.2357	5.65606	3.74138	4.38361	3.37108	1.53096	2.86593	3.31884	3.55594	3.21358	3.24275	2.74579	2.68015	2.87284	5.94992	CBWD6	COBW domain containing 6
ENSG00000108468	150.778	172.453	185.135	165.471	163.752	163.983	160.286	162.373	136.92	164.75	161.111	157.819	169.275	177.112	171.646	167.72	167.839	163.571	CBX1	chromobox 1
ENSG00000173894	22.6003	21.3416	23.1886	8.45234	7.92999	7.87921	18.1182	18.41	21.3715	9.1833	8.41129	8.3864	14.4516	15.4432	14.6922	7.68617	8.41735	7.76883	CBX2	chromobox 2
ENSG00000122565	425.26	445.972	432.588	269.834	284.104	277.385	401.839	394.724	379.266	258.76	263.553	271.378	346.337	341.363	360.963	282.167	280.961	267.845	CBX3	chromobox 3
ENSG00000266405	0.623837	0.363524	0.279986	0.320276	0.481266	0.352052	0.150505	0.181187	0.210859	0.293675	0.512464	0.352207	0.414244	0.162636	0.072473	0.283655	0.32907	0.228289	CBX3P2	chromobox 3 pseudogene 2
ENSG00000141582	26.4086	22.0233	25.0804	33.331	34.0445	34.2099	22.1192	20.9542	24.5735	31.4825	31.5079	32.5959	21.2569	21.2094	23.6071	31.1647	30.6723	34.9796	CBX4	chromobox 4
ENSG00000094916	45.6113	53.448	64.41	39.2422	38.2941	40.2315	53.489	50.8914	41.2733	45.4437	41.1348	33.7632	45.1862	57.4768	71.33	41.7697	44.3664	41.8355	CBX5	chromobox 5
ENSG00000183741	30.6581	27.7344	31.4964	44.6642	47.5028	47.6039	27.0457	29.9274	31.7203	43.6441	41.9185	39.3223	26.7174	30.6337	32.7814	49.048	52.0638	49.5079	CBX6	chromobox 6
ENSG00000100307	5.40995	5.29971	6.59831	10.2368	10.3676	9.06544	5.93872	6.11966	6.18414	7.70338	8.60362	8.89059	4.62051	4.69823	4.60387	8.39695	8.45377	9.13605	CBX7	chromobox 7
ENSG00000141570	13.4046	13.7268	15.0977	19.5253	19.9389	19.6477	12.4955	12.8191	15.8861	18.7914	16.4773	18.715	12.1881	13.7252	14.182	17.2903	18.6636	19.4707	CBX8	chromobox 8
ENSG00000100211	23.6399	21.9941	22.8757	29.035	29.7387	31.4825	22.3287	21.0748	22.1455	29.5171	28.3801	31.9158	20.3662	21.9981	19.4012	25.5972	24.4483	24.7281	CBY1	chibby family member 1, beta catenin antagonist
ENSG00000132024	23.3693	21.7343	23.5066	21.6949	23.2627	24.5153	22.4503	22.6375	25.9718	21.9152	23.7754	23.4962	21.0894	21.0066	19.4274	21.8511	22.8797	22.712	CC2D1A	coiled-coil and C2 domain containing 1A
ENSG00000154222	7.92264	8.20172	9.2273	13.1975	12.0049	12.2546	9.99393	8.24166	8.96489	12.0569	13.6147	13.2204	7.8216	7.71403	7.64392	13.0329	12.9657	14.1039	CC2D1B	coiled-coil and C2 domain containing 1B
ENSG00000048342	5.23264	5.22051	5.59466	6.872	7.18029	7.63887	3.83162	4.18711	4.96711	10.1809	8.73851	8.17937	4.06551	3.39859	4.75818	6.3255	7.02073	7.02974	CC2D2A	coiled-coil and C2 domain containing 2A
ENSG00000188649	0.221641	0.227534	0.301071	0.257768	0.827504	0.491236	0.318166	0.590125	0.653775	0.373208	0.801562	0.52682	0.186391	0.378021	0.219188	0.633844	0.571382	0.457966	CC2D2B	coiled-coil and C2 domain containing 2B
ENSG00000060339	61.9398	55.7713	54.8157	60.9108	61.5596	59.0675	63.7438	61.1831	38.2939	53.7491	56.9193	60.3825	45.6938	43.7469	46.3904	64.7904	63.4154	59.6344	CCAR1	cell division cycle and apoptosis regulator 1
ENSG00000158941	104.883	94.6435	98.2663	92.7407	108.718	108.149	107.931	95.3623	115.226	110.8	103.574	94.1816	81.9714	84.1521	92.2295	86.6712	110.947	94.9009	CCAR2	cell cycle and apoptosis regulator 2
ENSG00000135736	6.8039	6.48439	7.50859	9.33749	9.21207	9.2512	7.30926	7.48878	8.50756	9.3972	10.1056	10.9107	9.12939	9.09891	8.49698	9.14066	8.64104	10.2768	CCDC102A	coiled-coil domain containing 102A
ENSG00000150636	0.551955	0.87854	0.650557	0.962863	0.265999	0.136368	0.602306	0.419305	0.274384	0.917942	0.216449	0.405143	0.1684	0.129655	0.074893	0.083604	0.561449	0.169814	CCDC102B	coiled-coil domain containing 102B
ENSG00000214447	7.37024	7.21117	7.39486	9.63569	9.08195	10.6111	6.19944	6.12112	6.55295	9.68647	10.4214	9.20557	5.85253	6.41049	6.02322	7.22053	5.6358	5.33462	CCDC103	coiled-coil domain containing 103
ENSG00000167131	5.14848	3.35427	4.21966	6.14671	6.92356	7.71207	4.1769	3.4995	5.3422	7.25952	6.55472	7.41781	3.27281	2.40387	4.74377	3.76209	5.03303	5.00401	CCDC103	coiled-coil domain containing 103
ENSG00000173581	23.6858	21.9487	19.0878	18.1766	18.5381	19.7564	23.2232	22.6047	24.2302	20.5244	22.3132	23.6451	25.5688	23.7128	20.9486	18.1297	17.295	20.4318	CCDC106	coiled-coil domain containing 106
ENSG00000159884	12.4913	13.3572	12.6926	10.0455	10.5918	11.8256	13.2158	13.3807	13.7342	11.6596	11.8567	11.0694	14.2454	12.4977	11.3986	11.9213	11.7353	11.1543	CCDC107	coiled-coil domain containing 107
ENSG00000168491	4.28178	4.20136	3.58618	3.59904	2.38865	2.62295	4.89215	4.77511	2.80237	2.65432	2.88758	2.05974	3.12249	4.58763	3.68139	3.89714	4.86772	3.46666	CCDC110	coiled-coil domain containing 110
ENSG00000164221	9.55143	10.4081	9.36917	8.90441	8.29421	9.14256	10.8003	9.00516	7.19572	9.28949	8.74771	8.20139	8.54872	8.56976	8.78831	10.5453	10.3149	9.65973	CCDC112	coiled-coil domain containing 112
ENSG00000103021	10.0527	9.63141	8.92334	10.5646	10.9886	12.8494	9.23688	8.41052	7.8918	11.3578	10.0737	8.23842	7.22481	7.9109	9.59265	9.74765	7.91983	6.89504	CCDC113	coiled-coil domain containing 113
ENSG00000105479	3.13586	1.95743	1.64755	3.49478	3.81867	4.08714	1.76485	1.57219	1.35342	2.82732	3.53484	2.97828	0.609387	0.798014	0.778641	1.27982	1.64853	1.3101	CCDC114	coiled-coil domain containing 114
ENSG00000136710	30.2437	27.2472	28.0386	29.6642	30.5368	31.1039	28.6648	29.2449	30.3246	27.2786	29.6158	31.4696	30.3245	31.5654	27.5162	29.9871	29.1936	29.8185	CCDC115	coiled-coil domain containing 115
ENSG00000161180	0.228358	0.154209	0.150733	0.12807	0.074489	0.065616	0.206043	0.220034	0.135515	0.023933	0.111022	0.075988	0.043617	0.084566	0.163749	0.059339	0.142279	0.051243	CCDC116	coiled-coil domain containing 116
ENSG00000159873	25.8057	32.0005	34.0196	25.5716	23.1988	23.0747	35.0413	33.3223	22.0875	22.7249	21.663	20.1972	26.4999	27.0796	31.0139	21.3232	21.4044	21.9285	CCDC117	coiled-coil domain containing 117
ENSG00000160799	40.1064	46.1734	39.5742	55.9547	56.1916	56.7688	36.2836	36.527	52.3294	47.6605	49.0988	56.2172	43.3698	40.4756	38.8443	47.0089	45.4726	52.7092	CCDC12	coiled-coil domain containing 12
ENSG00000147144	23.1218	19.5265	22.0018	27.7271	30.9923	31.0454	22.1984	22.2157	23.4194	28.8155	29.4602	25.322	18.3556	20.038	21.1134	29.0334	32.9686	29.7707	CCDC120	coiled-coil domain containing 120
ENSG00000176714	5.20472	4.86191	5.24466	8.13238	7.84398	7.82403	5.65903	5.59179	4.48352	7.13872	7.77493	6.50764	5.30718	5.64522	5.27985	7.94984	7.85391	7.23896	CCDC121	coiled-coil domain containing 121
ENSG00000151773	0.5261	1.43119	1.64659	1.27678	1.59604	2.07446	2.08241	0.941833	0.971532	1.82543	1.58131	2.10231	1.44504	1.93557	1.02087	2.37512	1.13454	1.86708	CCDC122	coiled-coil domain containing 122
ENSG00000007080	83.4035	78.714	85.7409	67.3567	70.4839	67.7927	74.1	72.3307	92.1703	59.4271	58.2853	65.186	75.5629	80.5995	63.9151	58.7008	56.5765	59.4722	CCDC124	coiled-coil domain containing 124
ENSG00000183323	29.7423	33.0305	34.0508	46.8036	46.9121	46.4345	34.894	33.5976	34.3489	46.2707	42.9903	42.5279	27.9936	33.3279	34.4944	49.862	45.9964	47.3253	CCDC125	coiled-coil domain containing 125
ENSG00000169193	7.69795	8.93634	9.31994	13.3077	14.4965	12.3306	10.5737	8.17784	6.4122	13.6746	13.2074	15.146	8.56991	8.68187	9.50568	16.4123	16.6305	15.7656	CCDC126	coiled-coil domain containing 126
ENSG00000164366	8.04853	8.20155	7.45799	9.36087	12.668	12.8769	6.552	6.44369	10.9761	9.98309	8.06537	11.2847	9.32168	7.12365	9.25022	11.5835	10.5585	11.4422	CCDC127	coiled-coil domain containing 127
ENSG00000244607	1.52507	2.00151	1.63035	1.85931	1.56512	2.28467	1.17989	1.74809	0.881462	2.00676	2.15534	1.71683	0.441297	0.548091	0.811018	0.915829	0.702572	0.499788	CCDC13	coiled-coil domain containing 13
ENSG00000104957	7.68426	6.1808	6.81599	10.8438	9.50233	11.7585	7.2269	6.31013	5.83205	9.68971	9.86665	8.05213	5.12457	4.41101	5.13062	9.44999	10.8825	9.8143	CCDC130	coiled-coil domain containing 130
ENSG00000100147	8.86756	8.94559	10.7293	9.86984	8.83715	10.0604	8.91145	9.31483	8.79974	9.01608	7.98013	7.64494	7.03219	7.48377	8.8312	8.86121	9.34197	10.188	CCDC134	coiled-coil domain containing 134
ENSG00000128596	0.59436	0.807384	1.13864	0.197919	0.448523	0.575149	1.28137	0.618326	0.780999	0.477644	0.518529	0.268612	0.463593	0.596334	0.685667	0.297972	0.421258	0.142537	CCDC136	coiled-coil domain containing 136
ENSG00000185298	47.6098	47.1252	48.9868	35.3966	37.7274	36.0771	54.9575	53.3253	57.4145	40.5694	40.2898	42.9575	38.493	35.6903	36.9971	31.8367	32.7414	34.5601	CCDC137	coiled-coil domain containing 137
ENSG00000163006	6.73408	9.45071	7.47368	4.4764	4.94388	5.25646	7.99815	7.2703	8.82115	5.67174	5.92709	6.45966	4.36782	5.39417	6.02827	4.03378	3.97077	3.46723	CCDC138	coiled-coil domain containing 138
ENSG00000175455	23.0467	23.7436	21.4082	25.6548	23.3051	25.0159	27.1367	24.7773	18.1928	23.3873	28.7458	19.0555	13.8092	13.4736	17.6556	23.7816	22.9803	19.6285	CCDC14	coiled-coil domain containing 14
ENSG00000135637	5.84929	5.99678	5.84237	5.90763	6.60411	5.88094	6.74982	5.58775	5.96761	6.35585	6.62636	6.23178	3.98387	3.88146	5.06122	5.84702	7.4634	7.03732	CCDC142	coiled-coil domain containing 142
ENSG00000170160	2.84398	3.3818	3.49722	4.1239	3.83764	4.32059	3.84559	2.8724	0.916743	4.27074	5.18921	2.17165	0.817041	0.881025	2.38299	4.76948	4.99543	4.20043	CCDC144A	coiled-coil domain containing 144A
ENSG00000154874	4.07698	3.71449	2.74333	2.86912	3.61142	2.55655	3.80357	3.01764	2.2185	4.68873	4.95817	1.58628	1.18873	0.818799	2.87459	3.91807	4.14519	3.28205	CCDC144B	coiled-coil domain containing 144B (pseudogene)
ENSG00000135205	1.57587	1.51072	1.62951	2.03814	2.19278	2.7023	1.07321	0.980632	0.627746	2.14226	2.41107	2.01465	1.03404	0.762212	0.534118	0.558946	0.309729	0.625436	CCDC146	coiled-coil domain containing 146
ENSG00000153237	2.24855	2.32993	2.07686	3.59355	2.89951	3.81308	2.27006	1.8573	1.55211	3.63413	3.74278	3.13327	2.01543	1.52822	2.17224	3.15057	3.15477	2.97637	CCDC148	coiled-coil domain containing 148
ENSG00000181982	9.30002	9.88577	10.9976	20.6986	23.3981	22.4136	9.1474	9.29897	10.3387	22.0042	21.5193	20.052	10.4387	13.2146	14.5729	21.6525	22.9901	23.6564	CCDC149	coiled-coil domain containing 149
ENSG00000149548	8.11229	8.4977	9.07505	5.8998	5.45981	6.15256	9.54181	8.98524	7.38152	6.06004	6.20516	6.26741	6.71538	7.82414	8.08359	6.13273	5.32778	5.93133	CCDC15	coiled-coil domain containing 15
ENSG00000144395	2.93548	1.65239	2.29551	1.38176	1.61341	1.15736	1.77325	1.44668	1.43399	1.46783	2.32832	1.79889	0.712884	0.797846	1.55472	2.16806	2.81318	1.51317	CCDC150	coiled-coil domain containing 150
ENSG00000198003	7.4664	7.52044	8.14674	7.68477	7.75158	8.91191	5.71242	5.91582	7.35668	7.39372	7.33623	8.03328	6.74401	6.46117	6.51795	5.14135	5.23182	6.97527	CCDC151	coiled-coil domain containing 151
ENSG00000198865	0.205479	0.37146	1.07314	0.819084	0.428691	0.521783	0.423375	0.848054	0.203593	0.440572	0.758746	0.339941	0.496798	0.356677	0.422609	0.44484	0.949224	0.709538	CCDC152	coiled-coil domain containing 152
ENSG00000248712	12.1332	10.762	11.3082	9.00448	9.44617	9.57785	11.0508	10.6207	11.249	9.64003	9.36356	9.15081	12.4652	11.211	10.3846	8.95749	8.77945	9.80855	CCDC153	coiled-coil domain containing 153
ENSG00000197599	0.865025	0.526759	0.364068	1.24359	1.69972	2.13648	0.972057	0.782485	0.518625	1.27859	2.73977	1.72736	0.439483	0.133915	0.200588	1.59563	2.1284	1.32471	CCDC154	coiled-coil domain containing 154
ENSG00000187860	3.7345	2.75108	3.68696	4.64456	4.13258	5.36484	3.33234	2.86971	3.50175	3.56644	3.76759	3.90032	3.22713	2.64026	3.21213	3.70562	3.82802	4.32223	CCDC157	coiled-coil domain containing 157
ENSG00000163749	0.05798	0.041509	0.058535	0.373725	0.389187	0.283079	0.081927	0.33713	0.096822	0.331121	0.244219	0.295187	0.038238	0.089876	0.09188	0.208046	0.088673	0.148723	CCDC158	coiled-coil domain containing 158
ENSG00000183401	17.5842	17.1678	17.9795	52.3853	55.747	54.7523	12.988	13.579	13.8776	33.7837	40.6999	35.3404	12.9993	15.2918	12.2879	38.2532	44.8896	40.5514	CCDC159	coiled-coil domain containing 159
ENSG00000203952	3.58388	4.73416	4.554	9.31687	8.04552	9.07348	3.39945	3.503	2.15372	6.26106	6.5556	7.66075	4.21422	4.0054	4.31494	8.92176	8.26638	8.50189	CCDC160	coiled-coil domain containing 160
ENSG00000203799	0.073037	0.045067	0.096925	0.175701	0.112253	0.227933	0.111477	0.115159	0.146139	0.242879	0.242668	0.484004	0.02937	0.021662	0.159949	0.067415	0.129453	0.087618	CCDC162P	coiled-coil domain containing 162, pseudogene
ENSG00000280670	1.79238	1.4929	1.67841	1.19363	1.60804	1.41346	1.64708	1.5351	2.00991	1.74474	1.55922	1.22944	1.36887	1.65245	1.48989	1.60119	1.57793	1.25426	CCDC163	coiled-coil domain containing 163
ENSG00000198937	60.0448	62.8411	65.5751	51.8815	56.3774	59.5559	56.7099	59.6085	68.2598	46.1693	52.9933	54.9852	71.1346	59.031	63.2722	55.0187	58.6338	52.4885	CCDC167	coiled-coil domain containing 167
ENSG00000242715	0.678838	0.249903	0.541224	0.728364	0.797141	0.987955	0.346587	0.605125	0.247364	2.81553	1.8805	2.46624	0.357821	0.368134	0.697719	1.34604	1.04264	1.32509	CCDC169	coiled-coil domain containing 169
ENSG00000159588	0.450588	0.177306	0.336432	0.286889	0.406097	0.396498	0.451094	0.348758	0.808654	0.204848	0.350389	0.179864	0.086065	0.089179	0.125791	0.13097	0.211373	0.355032	CCDC17	coiled-coil domain containing 17
ENSG00000120262	5.42379	5.69837	5.68032	7.02843	6.97534	8.04149	4.92064	5.26063	4.85491	7.54579	7.30945	6.48525	4.65604	5.7721	4.8798	7.63696	7.35787	6.65983	CCDC170	coiled-coil domain containing 170
ENSG00000164989	1.08045	1.01504	1.04806	1.35514	1.48147	1.64446	1.1142	1.21337	1.18928	1.71704	1.6609	1.64981	0.878305	0.795944	0.776374	1.23902	1.11052	0.966346	CCDC171	coiled-coil domain containing 171
ENSG00000154479	0.951742	0.825528	0.581486	1.23763	1.00584	1.35804	0.591174	0.645408	1.15695	0.682743	0.902795	0.622697	0.364272	0.437619	0.407103	0.386906	0.416908	0.595112	CCDC173	coiled-coil domain containing 173
ENSG00000154781	13.7344	14.5206	16.1126	19.3352	21.2234	18.3145	17.4272	13.1975	17.8113	15.2949	19.6554	17.0514	12.7114	9.90824	12.8832	22.1191	18.8276	22.5804	CCDC174	coiled-coil domain containing 174
ENSG00000267909	0.534676	0.660736	0.837604	0.224972	0.224791	0.29911	0.89024	1.04385	0.957057	0.450191	0.301813	0.28497	0.593729	0.584535	0.818361	0.876608	1.03022	0.970388	CCDC177	coiled-coil domain containing 177
ENSG00000122483	4.34297	4.47572	3.85337	2.47451	2.25656	1.38011	3.72104	2.90223	2.76533	1.93439	2.24885	1.81362	2.02166	2.37537	2.5469	2.71324	1.62797	3.19002	CCDC18	coiled-coil domain containing 18
ENSG00000197816	1.20642	0.431245	0.661959	0.924071	1.35232	0.584588	0.756184	0.732036	0.705362	1.53714	0.97963	1.83488	0.745076	0.572113	0.56807	1.60365	2.15061	1.45215	CCDC180	coiled-coil domain containing 180
ENSG00000213213	3.51175	1.84218	3.00055	4.41127	4.98227	5.73948	1.69393	2.32453	1.40275	2.52466	3.41803	4.74402	1.71145	1.76725	1.38364	2.42604	3.65173	4.36613	CCDC183	coiled-coil domain containing 183
ENSG00000228544	3.04234	2.74472	2.67262	4.08458	4.37767	4.27643	2.92521	2.87154	3.03491	4.59723	4.37807	4.17815	2.24477	2.48531	2.74925	3.28829	3.87012	3.70365	CCDC183-AS1	CCDC183 antisense RNA 1
ENSG00000177875	0.142705	0.21416	0.170099	0.207402	0.18174	0.22507	0.305267	0.325753	0.410242	0.142261	0.203525	0.328031	0.136895	0.226185	0.233006	0.041515	0.067838	0.104795	CCDC184	coiled-coil domain containing 184
ENSG00000165813	6.86512	7.40346	7.30165	9.8324	10.6128	9.36719	7.7992	5.84807	4.55816	11.4298	10.3521	8.18492	5.85064	6.87617	7.52534	12.0357	11.0788	12.0953	CCDC186	coiled-coil domain containing 186
ENSG00000196118	20.5052	18.0783	20.4715	18.5448	18.824	19.9009	17.7715	16.1512	18.0025	12.7758	16.4498	17.7377	10.8321	9.95312	9.89797	11.4415	9.64632	10.478	CCDC189	coiled-coil domain containing 189
ENSG00000163617	4.76592	4.26559	5.4029	9.41417	9.02833	9.01051	4.53755	4.12464	3.70742	7.9627	7.24658	6.77238	3.86176	3.69854	4.26548	9.03841	7.77564	7.71619	CCDC191	coiled-coil domain containing 191
ENSG00000230561	0.371037	0.387975	0.406431	0.242444	0.315307	0.234659	0.277875	0.298659	0.278102	0.091881	0.248591	0.128954	0.269248	0.434961	0.53774	0.41323	0.202287	0.231936	CCDC192	coiled-coil domain containing 192
ENSG00000269720	0.263614	0.24652	0.049203	0.31565	0.130504	0.08602	0.273904	0.390129	0.217191	0.11785	0.316707	0.39594	0.043185	0.137881	0	0	0.182253	0	CCDC194	coiled-coil domain containing 194
ENSG00000236383	0.345625	0.435653	0.406801	0.320377	0.487971	0.325059	0.399051	0.570688	0.284306	0.852149	0.318496	0.579887	0.297665	0.163304	0.261358	0.601188	0.361745	0.576453	CCDC200	coiled-coil domain containing 200
ENSG00000101997	27.5714	26.1579	26.7976	33.744	34.4373	33.1926	25.0529	27.4847	32.0891	30.5945	30.4171	31.1583	26.2664	25.7815	23.3301	29.6027	30.5055	31.081	CCDC22	coiled-coil domain containing 22
ENSG00000159214	15.9389	14.6317	13.5228	17.4388	18.2081	20.2076	13.1728	13.1568	14.013	15.0791	18.9872	15.8099	11.4947	10.9729	11.1342	13.7867	15.7325	15.5327	CCDC24	coiled-coil domain containing 24
ENSG00000147419	27.0286	37.3958	36.9172	30.5143	32.5345	30.8995	36.8912	38.4492	23.92	37.383	34.7378	33.6676	27.323	33.2998	31.1447	30.4775	30.2576	31.7175	CCDC25	coiled-coil domain containing 25
ENSG00000229140	1.25414	0.56908	0.796651	1.52971	1.25991	1.47965	0.934466	0.327026	0.547919	1.28992	1.29629	0.642879	0.428339	0.444583	1.01302	0.794832	1.34815	1.32423	CCDC26	CCDC26 long non-coding RNA
ENSG00000024862	4.35492	5.77884	6.33754	11.8149	10.8745	10.2572	5.45999	6.40329	4.83437	11.7451	11.1942	12.4591	5.18392	4.42991	4.39093	10.7619	10.9957	11.1247	CCDC28A	coiled-coil domain containing 28A
ENSG00000160050	13.8604	11.6141	12.953	4.44701	3.78186	3.18665	13.7359	15.3814	16.5438	6.01194	6.54181	6.70254	13.7835	12.0762	12.1441	3.94487	3.8387	4.97681	CCDC28B	coiled-coil domain containing 28B
ENSG00000186409	2.59958	2.57198	2.52072	5.134	3.61683	3.39764	2.1598	1.71934	1.31462	4.10584	3.91253	3.6835	2.11963	1.34259	1.88161	2.65084	3.66749	2.59126	CCDC30	coiled-coil domain containing 30
ENSG00000128891	22.4894	24.5357	23.0457	28.4538	28.2046	32.322	20.9273	29.187	22.6987	31.0997	23.9677	28.1739	19.2948	16.5702	18.7865	31.3347	36.9619	30.47	CCDC32	coiled-coil domain containing 32
ENSG00000140481	0.258002	0.357527	0.416952	0.202301	0.404925	0.415019	0.140327	0.136726	0.176836	0.217341	0.246656	0.306132	0.023151	0.070407	0.026012	0.186025	0	0.031138	CCDC33	coiled-coil domain containing 33
ENSG00000109881	53.5239	61.5559	57.9378	39.0013	38.5474	42.8082	49.2087	45.0725	48.4685	34.2282	35.2705	36.2572	50.1627	50.3926	47.3954	32.518	34.6986	35.6602	CCDC34	coiled-coil domain containing 34
ENSG00000284862	1.14549	1.41243	1.49795	2.16994	1.50332	3.41836	1.46568	1.14463	0.951302	1.99236	2.06852	2.65948	0.668623	0.444576	0.362134	1.10895	0.7755	0.43617	CCDC39	coiled-coil domain containing 39
ENSG00000141519	9.8522	9.5634	7.75182	9.1024	9.1279	10.281	7.78186	7.35327	7.76788	8.40095	9.7148	7.94426	3.83723	3.59418	5.71531	8.47295	8.01206	8.07109	CCDC40	coiled-coil domain containing 40
ENSG00000180329	41.3154	47.8216	46.7214	44.8292	45.0693	46.994	44.6713	43.5161	36.6752	43.268	44.9502	42.5645	40.8016	41.5481	42.827	48.7136	46.1085	46.4579	CCDC43	coiled-coil domain containing 43
ENSG00000108588	141.888	152.635	159.921	154.749	144.335	149.399	168.233	166.268	147.714	167.572	156.973	161.643	150.59	163.385	154.866	156.711	153.442	149.772	CCDC47	coiled-coil domain containing 47
ENSG00000152492	29.0195	35.4697	32.3613	37.4329	36.5808	35.8392	37.2327	34.075	27.71	39.2607	38.6457	33.3766	28.7482	32.2993	31.7939	39.9533	38.7856	37.2517	CCDC50	coiled-coil domain containing 50
ENSG00000164051	24.207	24.4365	27.6776	23.089	23.8237	22.4958	26.2071	27.7663	28.6958	21.429	20.4488	21.6796	23.3601	22.0727	20.9504	20.1484	20.6331	19.6954	CCDC51	coiled-coil domain containing 51
ENSG00000176155	66.0909	54.9925	54.6555	44.1416	46.4552	46.3159	61.9427	57.4082	59.8158	49.2431	51.4932	43.9028	56.6988	54.9613	46.1039	40.6194	43.2432	43.2541	CCDC57	coiled-coil domain containing 57
ENSG00000160124	43.9181	50.4078	41.9041	37.6694	34.7636	31.0698	44.1674	43.0804	42.2247	36.4746	31.2039	35.2279	35.6826	40.2407	35.6672	38.0632	30.6984	36.0364	CCDC58	coiled-coil domain containing 58
ENSG00000133773	64.2361	70.8935	67.7518	63.7224	63.704	59.7016	70.1557	72.2759	69.8084	57.4611	56.2735	59.2219	63.0444	56.0759	55.6674	60.3371	62.0031	62.0136	CCDC59	coiled-coil domain containing 59
ENSG00000108091	52.0848	56.0137	63.5382	102.316	98.9063	94.4444	61.3678	60.7124	52.4319	108.773	102.541	95.7681	50.7892	56.0924	62.0937	94.9141	100.373	93.0029	CCDC6	coiled-coil domain containing 6
ENSG00000183273	1.4317	0.893663	1.3515	1.71363	1.36252	1.8484	1.88498	0.969018	1.355	2.38941	2.45787	1.78904	0.869474	0.710809	1.39755	0.313554	0.311777	0.6139	CCDC60	coiled-coil domain containing 60
ENSG00000104983	5.44773	4.04558	4.77612	5.94093	5.58663	4.9344	4.50048	4.2973	4.71344	5.90643	4.01819	4.69223	4.4477	4.22894	3.77136	4.42975	4.69507	4.48749	CCDC61	coiled-coil domain containing 61
ENSG00000139537	2.24043	2.47419	2.32359	3.56785	3.7223	4.81692	2.73103	1.94013	2.02203	3.72256	4.60956	4.27309	1.26511	1.34971	1.34455	1.18886	1.32883	0.888782	CCDC65	coiled-coil domain containing 65
ENSG00000180376	5.93337	5.55025	5.95707	5.70054	4.40613	4.47171	7.92964	5.52007	4.33148	5.81295	6.60891	5.84224	3.62951	3.62824	3.63872	5.40628	5.50381	5.08503	CCDC66	coiled-coil domain containing 66
ENSG00000198624	1.62539	1.54025	1.56205	2.90228	3.29288	3.6543	1.55479	1.66201	1.62893	4.34749	4.26792	3.65467	1.86028	1.93871	1.81725	4.04001	5.0964	3.7076	CCDC69	coiled-coil domain containing 69
ENSG00000216937	0.925598	1.53407	1.69835	1.12254	1.60169	0.979615	1.36446	0.904297	0.415201	1.03007	1.47374	2.20727	0.643372	0.610291	1.27338	0.871755	1.83393	2.26117	CCDC7	coiled-coil domain containing 7
ENSG00000177352	17.41	17.9559	17.4861	20.5351	19.4672	20.061	19.4143	19.4987	21.4408	20.7444	20.5621	19.1106	18.5066	18.3106	16.0238	17.6678	18.5867	20.5411	CCDC71	coiled-coil domain containing 71
ENSG00000253276	6.60181	7.1318	6.83552	7.70751	7.53834	7.74029	6.43892	6.66463	6.83114	5.62064	7.19409	6.42134	7.15491	6.69376	6.13201	7.32135	7.71924	7.7956	CCDC71L	coiled-coil domain containing 71 like
ENSG00000163040	13.5855	13.3388	13.9776	8.99159	10.3709	10.3887	11.7489	12.4749	10.988	8.47245	10.861	8.56241	10.0262	9.27815	8.16425	6.43616	4.63182	5.40487	CCDC74A	coiled-coil domain containing 74A
ENSG00000152076	10.0659	9.7425	10.4983	4.25726	4.68072	5.8743	11.728	9.86916	10.9155	4.24599	5.5745	4.41118	8.73687	7.72374	8.57368	2.43269	3.55734	3.34837	CCDC74B	coiled-coil domain containing 74B
ENSG00000120647	7.42862	8.5744	8.50814	7.5444	7.07033	7.88087	7.21914	7.57043	6.54139	7.85179	8.06117	8.22898	8.1009	6.81899	6.70228	7.79946	8.00169	7.94378	CCDC77	coiled-coil domain containing 77
ENSG00000162004	11.9112	9.07341	8.13317	7.90484	9.20525	10.6304	9.6941	8.85613	7.33773	11.4692	13.486	10.7288	3.07079	2.7166	3.60805	4.18341	3.7033	5.146	CCDC78	coiled-coil domain containing 78
ENSG00000091986	1.95475	1.87033	2.71199	0.60932	0.573494	0.751195	3.00573	1.68299	1.52856	1.77953	1.06048	1.67847	2.47737	1.92869	2.52382	1.09158	0.760815	13.952	CCDC80	coiled-coil domain containing 80
ENSG00000149201	0.183572	0.317055	0.241728	0.211172	0.177795	0.233561	0.296239	0.244958	0.163121	0.289771	0.397005	0.387778	0.125541	0.173287	0.122139	0.25745	0.160307	0.167654	CCDC81	coiled-coil domain containing 81
ENSG00000149231	1.84749	2.61027	3.04361	6.91864	6.17282	7.16936	1.96084	1.81307	1.30168	5.78549	5.64643	5.47666	1.87625	1.56564	2.48727	8.20039	6.96529	8.16245	CCDC82	coiled-coil domain containing 82
ENSG00000186166	21.6374	21.5567	21.6572	30.1712	28.6591	30.4524	20.7312	17.5667	15.27	25.7747	30.306	26.7555	16.4106	13.6163	18.0937	32.5278	28.1924	26.8546	CCDC84	coiled-coil domain containing 84
ENSG00000055813	1.44763	1.48757	1.6915	1.99334	1.76122	1.71821	1.55964	1.69825	1.69715	1.27608	1.29721	1.60523	0.996946	1.20028	0.941478	1.29436	1.33181	1.65057	CCDC85A	coiled-coil domain containing 85A
ENSG00000175602	72.9633	72.5027	77.4783	27.0441	32.799	30.6211	74.1793	75.6849	95.9375	31.2914	30.7376	39.0324	79.5031	67.9077	66.2804	30.7277	29.071	27.7239	CCDC85B	coiled-coil domain containing 85B
ENSG00000205476	47.4066	45.2121	47.2654	36.4962	37.1477	37.5646	47.736	46.9976	54.1045	40.3438	39.8054	36.805	37.496	48.4923	45.9846	42.2703	42.661	37.7889	CCDC85C	coiled-coil domain containing 85C
ENSG00000110104	63.4485	62.1044	71.7846	35.9178	37.0452	35.9569	63.4679	62.9951	70.5758	33.7955	34.2188	37.6638	48.3212	52.9959	47.6721	33.6186	32.0837	31.3407	CCDC86	coiled-coil domain containing 86
ENSG00000182791	0.780403	0.769421	0.790577	1.63754	1.16739	1.24525	0.721831	0.789108	0.739159	1.15143	1.174	1.21748	0.570992	0.573565	0.673937	0.751898	0.659685	0.724427	CCDC87	coiled-coil domain containing 87
ENSG00000115355	1.35188	1.35252	1.54683	0.553376	0.867173	0.708181	1.32516	0.946184	1.12418	0.998458	0.94479	0.884586	1.03931	0.833681	1.04891	1.24922	1.33962	1.11438	CCDC88A	coiled-coil domain containing 88A
ENSG00000168071	5.09786	6.08992	5.49349	7.43429	6.43837	7.74692	5.56568	5.70716	5.92598	6.63334	6.26917	6.75601	5.71628	4.62463	4.98713	5.46566	6.03556	6.79445	CCDC88B	coiled-coil domain containing 88B
ENSG00000015133	6.35486	5.72179	5.97964	3.33873	3.41216	3.48839	6.40528	6.63916	6.70788	3.64317	3.48482	2.90475	3.96805	3.63774	5.25336	2.8281	3.30732	2.87111	CCDC88C	coiled-coil domain containing 88C
ENSG00000179071	0.501057	0.62193	0.593411	0.314336	0.397492	0.506779	0.669247	0.749611	0.667324	0.539359	0.627486	0.763322	0.239261	0.230409	0.294724	0.125191	0.259162	0.248666	CCDC89	coiled-coil domain containing 89
ENSG00000105321	29.7009	23.6729	27.9681	21.8554	22.4634	22.1919	25.1284	24.8027	29.1436	21.2873	17.2866	21.084	23.3806	22.3978	25.3159	17.5079	17.8659	18.8896	CCDC9	coiled-coil domain containing 9
[truncated: 21,378 more rows]

## Sheet: T47DTamoxifenVsProlif-DEG
ENSEMBL ID	Gene	logFC	AveExpr	t	P.Value	adj.P.Val
[truncated: 2,462 more rows]

## Sheet: T47DTamoxifenVsProlif_GSEA
Hallmark Gene Sets with FDR < 1exp-10	NGenes	Direction	PValue	FDR
[truncated: 215 more rows]

## Sheet: T47DvsH2A.J-KO_DEG
Ensembl ID	Gene	logFC	AveExpr	t	P.Value	adj.P.Val	GeneName
[truncated: 107 more rows]

[truncated: 1 more sheets: H2A.J-KOvsT47D_GSEA]
